# Supplementary material for: Correction: Gene Expression Ratios Lead to Accurate and Translatable Predictors of DR5 Agonism across Multiple Tumor Lineages
Source: PLoS One. 2016 Jan 5;11(1):e0146635. doi: 10.1371/journal.pone.0146635 (PMC4701183; doi:10.1371/journal.pone.0146635)
Supplement: S1 File — Excel table showing for each line the IC50, Amax, experimental sensitivity call, MAS5 gene expression value, 2-gene prediction, and GREPDR5 prediction for all genes used in the GREP model. All genes. Excel table showing differential analysis of all genes with DR5Nb1-tetra sensitivity calls. GREP model classifier. Excel table showing coefficients for ratios used in the GREPDR5 model. In-vivo data. Excel table showing for each primary tumor xenograft model, the T/C, sensitivity call, GREP prediction and gene expression for all genes used in the GREP model. (XLSX) [file pone.0146635.s001.xlsx]

## Sheet: Data S1 Invitro data
							CLIP 2012			Lab			CRXX											Affy U133+2 microarray MAS5 values for genes used in GREP modeling
Description	clean_name	primary_site	hist_subtype	hist_subtype2	hist_subtype3	Pathologist_annotation	IC50 CLIP 2012	Amax CLIP 2012	Calls CLIP	IC50 Lab	Amax Lab	Calls Lab	IC50 CRXX	Amax CRXX	Calls CRXX	consensus_sensitivity	209295_at_TNFRSF10B	213373_s_at_CASP8	High DR5 (1: >= median; 0: < median)	High Casp8 (1: >=median; 0: <median)	2gene prediction (1: predicted sensitive; 0: predicted resistant	GREP prediction score	GREP prediction class	ARHGDIA	ATF3	BAX	BCL2	BCL2L1	BID	BIRC2	BIRC3	BTRC	CASP10	CASP8	CDKN2A	CFLAR	CUL3	CYLD	EGR1	EZR	FADD	FAS	FASLG	FBXW7	GALNT14	HUWE1	IL8	ITCH	MADD
NCIH524_LUNG	NCIH524	lung	carcinoma	small_cell_carcinoma		Lung:SCLC	0.05	-66.8463	Resistant							Resistant	50.3873	11.4604	0	0	0	0.00796195	Predicted resistant	186	20	184	38	210	250	471	1	59	2	12	332	10	211	76	33	59	291	7	10	121	499	56	3	304	71
KPNSI9S_AUTONOMIC_GANGLIA	KPNSI9S	autonomic_ganglia	neuroblastoma			CNS:Neuroblastoma	3.78583e-05	95.7859	Sensitive							Sensitive	3222.5	1212.44	1	1	1	0.839182	Predicted sensitive	129	25	488	89	109	556	1001	27	119	19	1213	63	394	165	54	915	36	343	570	10	173	172	16	1014	197	82
MOLT13_HAEMATOPOIETIC_AND_LYMPHOID_TISSUE	MOLT13	haematopoietic_and_lymphoid_tissue	lymphoid_neoplasm	acute_lymphoblastic_T_cell_leukaemia	L2	Leukemia:ALL											0.4788	863.255	0	1	0	0.0357082	Predicted resistant	98	20	65	155	57	441	986	99	185	82	864	18	510	340	181	135	80	432	293	18	247	105	81	8	199	110
NCIH2029_LUNG	NCIH2029	lung	carcinoma	small_cell_carcinoma		Lung:SCLC											0.7112	291.054	0	0	0	0.00295135	Predicted resistant	39	16	245	630	201	437	1046	14	38	1	291	768	456	113	64	325	57	411	54	7	255	81	39	3	197	169
NCIH2052_PLEURA	NCIH2052	pleura	mesothelioma			Lung:Mesothelioma				10	0	Resistant	0.0001	-0.00731208	Resistant	Resistant	1073.11	662.596	1	1	1	0.098805	Predicted resistant	214	22	773	34	379	386	1446	309	142	23	663	13	3104	220	320	350	42	1178	1333	3	156	638	42	421	436	47
HUCCT1_BILIARY_TRACT	HUCCT1	biliary_tract	carcinoma			Biliary_Tract											1136.65	564.297	1	1	1	0.109028	Predicted resistant	200	17	258	5	432	734	3807	2628	20	41	565	425	1116	103	39	7866	67	1252	431	3	88	657	67	960	452	82
SNU869_BILIARY_TRACT	SNU869	biliary_tract	carcinoma			Biliary_Tract											2943.73	1443.58	1	1	1	0.458848	Predicted resistant	242	8	45	4	634	401	1118	807	101	116	1444	114	1512	154	140	2216	115	217	467	15	267	405	26	890	449	91
BDCM_HAEMATOPOIETIC_AND_LYMPHOID_TISSUE	BDCM	haematopoietic_and_lymphoid_tissue	lymphoid_neoplasm	acute_lymphoblastic_B_cell_leukaemia		Leukemia:ALL	0.05	-52.8223	Resistant							Resistant	1331.36	188.42	1	0	0	0.0274174	Predicted resistant	124	24	332	407	136	396	1041	1135	89	38	189	38	2609	100	298	684	78	321	1536	11	379	10	35	21	245	39
MDAMB134VI_BREAST	MDAMB134VI	breast	carcinoma	ductal_carcinoma		Breast:Carcinoma											1.7903	59.0048	0	0	0	0.00211619	Predicted resistant	16	6	38	737	127	312	700	7	134	3	59	133	171	458	149	51	43	2784	3	9	196	267	41	15	183	76
NCIH1694_LUNG	NCIH1694	lung	carcinoma	small_cell_carcinoma		Lung:SCLC											1.4052	13.3666	0	0	0	3.35607e-05	Predicted resistant	177	11	134	172	105	152	431	7	103	23	14	697	339	179	89	266	43	204	13	17	152	694	62	8	178	67
ALLSIL_HAEMATOPOIETIC_AND_LYMPHOID_TISSUE	ALLSIL	haematopoietic_and_lymphoid_tissue	lymphoid_neoplasm	acute_lymphoblastic_T_cell_leukaemia		Leukemia:ALL				10	0	Resistant				Resistant	2.7609	989.864	0	1	0	0.156974	Predicted resistant	137	5	91	624	187	577	635	82	107	126	990	8	308	217	138	11	37	353	87	18	397	3	44	9	193	79
CORL24_LUNG	CORL24	lung	carcinoma	small_cell_carcinoma		Lung:SCLC											2.706	7.998	0	0	0	0.000149448	Predicted resistant	11	4	202	359	524	203	922	13	203	3	8	317	367	190	383	699	33	155	13	3	174	502	64	40	230	191
CPCN_LUNG	CPCN	lung	carcinoma	small_cell_carcinoma		Lung:SCLC											3	10.2035	0	0	0	0.00333098	Predicted resistant	132	9	122	18	327	1014	688	10	91	17	11	759	120	260	458	184	52	265	1	3	103	1594	80	26	177	163
NCIH1836_LUNG	NCIH1836	lung	carcinoma	small_cell_carcinoma		Lung:SCLC											2.1777	159.732	0	0	0	0.00124955	Predicted resistant	158	4	310	260	441	494	589	3	122	12	160	969	513	245	158	129	21	303	86	11	139	2	41	12	144	187
CORL51_LUNG	CORL51	lung	carcinoma	small_cell_carcinoma		Lung:SCLC											3.4772	16.7811	0	0	0	0.000161525	Predicted resistant	29	2	216	444	277	458	1528	23	122	2	17	1072	557	170	201	841	31	187	9	11	301	23	73	10	224	88
DMS153_LUNG	DMS153	lung	carcinoma	small_cell_carcinoma		Lung:SCLC											3.7733	397.12	0	0	0	0.00154641	Predicted resistant	93	3	287	1335	196	342	1019	54	91	2	398	824	758	240	50	515	32	315	52	10	744	144	26	26	131	140
ECC12_STOMACH	ECC12	stomach	carcinoma	small_cell_adenocarcinoma		Gastric:Carcinoma											3.5896	179.644	0	0	0	0.000344101	Predicted resistant	90	4	410	10	106	81	1514	12	164	15	180	318	1099	74	176	3503	28	312	18	11	1649	1	29	16	242	84
TT_THYROID	TT	oesophagus	carcinoma	medullary_carcinoma		Oesophagus:Carcinoma											4.0172	183.641	0	0	0	0.00158644	Predicted resistant	34	3	97	1051	88	249	414	14	143	14	184	11	395	252	225	888	24	350	24	4	1283	399	58	281	155	136
OAW42_OVARY	OAW42	ovary	carcinoma			Ovary:Carcinoma	0.05	-36.1386	Resistant	10	0	Resistant				Resistant	1281.51	547.413	1	1	1	0.118276	Predicted resistant	38	4	462	57	251	156	974	490	78	2	548	190	752	219	64	8823	68	336	1201	17	136	1100	30	149	293	34
NCIH810_LUNG	NCIH810	lung	carcinoma	large_cell_carcinoma		Lung:NSCLC_Large_Cell	0.05	3.55784	Resistant							Resistant	5.3355	146.78	0	0	0	0.00129422	Predicted resistant	120	294	199	23	208	291	799	10	152	14	147	687	480	243	61	4850	46	287	10	11	807	4	34	15	244	100
NCIH209_LUNG	NCIH209	lung	carcinoma	small_cell_carcinoma		Lung:SCLC											5.3747	40.7423	0	0	0	0.000398617	Predicted resistant	100	5	165	343	210	302	811	3	126	2	41	479	500	330	122	232	30	492	6	12	253	5	44	10	237	95
NCIH1963_LUNG	NCIH1963	lung	carcinoma	small_cell_carcinoma		Lung:SCLC											6.6077	24.0403	0	0	0	7.58773e-05	Predicted resistant	152	17	240	386	151	250	1022	3	119	17	25	860	318	189	317	124	34	357	2	5	262	134	108	9	180	226
NCIH2141_LUNG	NCIH2141	lung	carcinoma	small_cell_carcinoma		Lung:SCLC											6.3555	61.8565	0	0	0	0.000649403	Predicted resistant	37	2	150	1027	131	216	749	9	120	13	62	1174	273	372	117	405	15	218	40	9	170	3	99	3	188	702
NCIH446_LUNG	NCIH446	lung	carcinoma	small_cell_carcinoma		Lung:SCLC											7.6449	23.2816	0	0	0	0.00022174	Predicted resistant	174	25	330	55	175	338	738	3	63	16	24	603	366	219	50	635	27	255	209	12	150	313	31	13	356	169
RAJI_HAEMATOPOIETIC_AND_LYMPHOID_TISSUE	RAJI	haematopoietic_and_lymphoid_tissue	lymphoid_neoplasm	Burkitt_lymphoma		Lymphoma:NH_B_cell	0.05	-35.8099	Resistant							Resistant	396.966	251.191	0	0	0	0.0656046	Predicted resistant	117	15	149	102	128	522	1098	3000	82	12	252	364	402	243	89	165	115	697	1179	2	214	681	95	6	237	52
HPBALL_HAEMATOPOIETIC_AND_LYMPHOID_TISSUE	HPBALL	haematopoietic_and_lymphoid_tissue	lymphoid_neoplasm	acute_lymphoblastic_T_cell_leukaemia		Leukemia:ALL	0.05	-35.4952	Resistant	10	0	Resistant				Resistant	1.1043	743.32	0	1	0	0.00825645	Predicted resistant	70	18	113	332	149	205	1538	617	117	42	744	294	708	234	91	352	38	531	170	13	442	3	39	15	185	128
DMS79_LUNG	DMS79	lung	carcinoma	small_cell_carcinoma		Lung:SCLC	0.05	-34.7286	Resistant							Resistant	105.812	185.318	0	0	0	0.00107488	Predicted resistant	30	28	115	805	203	125	1534	6	74	16	186	879	719	223	45	79	63	271	59	15	132	18	30	20	345	104
CORL88_LUNG	CORL88	lung	carcinoma	small_cell_carcinoma		Lung:SCLC	0.05	3.95513	Resistant							Resistant	12.0415	127.264	0	0	0	0.00142977	Predicted resistant	15	2	241	856	206	248	820	7	64	11	128	674	608	205	98	978	21	147	26	8	202	2	103	6	186	167
NCIH2171_LUNG	NCIH2171	lung	carcinoma	small_cell_carcinoma		Lung:SCLC											12.8858	41.9164	0	0	0	0.00335073	Predicted resistant	104	34	196	52	295	400	291	3	106	19	42	266	121	73	50	199	88	178	7	15	83	3	26	2	407	138
OUMS23_LARGE_INTESTINE	OUMS23	large_intestine	carcinoma	adenocarcinoma		Colorectal:Carcinoma	0.05	-32.5568	Resistant	10	3	Resistant				Resistant	445.703	132.128	0	0	0	0.0178627	Predicted resistant	11	24	170	2	221	192	1358	9	103	41	133	223	709	71	22	2609	161	863	15	5	118	8	23	9	440	56
SCLC21H_LUNG	SCLC21H	lung	carcinoma	small_cell_carcinoma		Lung:SCLC											13.7224	37.7175	0	0	0	0.00638998	Predicted resistant	40	29	97	55	159	363	709	1	146	4	38	536	150	196	175	28	32	153	25	7	249	412	78	22	249	182
SW1417_LARGE_INTESTINE	SW1417	large_intestine	carcinoma	adenocarcinoma		Colorectal:Carcinoma	0.05	-31.8046	Resistant	10	7	Resistant				Resistant	434.058	629.443	0	1	0	0.0321145	Predicted resistant	92	9	273	9	1061	478	958	81	73	20	630	30	1806	246	101	3283	84	760	437	261	96	13	35	226	513	132
NCIH1105_LUNG	NCIH1105	lung	carcinoma	small_cell_carcinoma		Lung:SCLC											15.0918	112.069	0	0	0	0.00168303	Predicted resistant	10	4	320	1584	175	251	1480	14	138	7	113	558	274	329	222	2690	32	127	15	15	297	12	70	22	245	505
NCIH1930_LUNG	NCIH1930	lung	carcinoma	small_cell_carcinoma		Lung:SCLC											15.1465	7.1917	0	0	0	0.000636233	Predicted resistant	102	24	116	97	215	513	1185	37	89	2	8	418	526	154	67	726	10	273	22	2	161	293	61	11	237	152
143B_BONE	143B	bone	osteosarcoma			Bone:Sarcoma_Osteo											1325.41	452.813	1	0	0	0.394301	Predicted resistant	147	8	145	69	254	358	3112	19	99	24	453	20	459	221	48	691	20	1495	97	10	136	996	36	659	310	55
NCIH1436_LUNG	NCIH1436	lung	carcinoma	small_cell_carcinoma		Lung:SCLC											16.6093	150.448	0	0	0	0.000885191	Predicted resistant	20	4	271	517	123	264	1094	32	144	3	151	1049	393	230	180	636	35	197	16	7	1245	140	127	30	164	103
HEL_HAEMATOPOIETIC_AND_LYMPHOID_TISSUE	HEL	haematopoietic_and_lymphoid_tissue	haematopoietic_neoplasm	acute_myeloid_leukaemia	M6	Leukemia:AML											18.4595	810.816	0	1	0	0.103337	Predicted resistant	71	4	270	51	461	776	1446	6	123	40	811	6	784	222	127	711	18	199	53	2	120	307	72	20	285	176
NCIH510_LUNG	NCIH510	lung	carcinoma	small_cell_carcinoma		Lung:SCLC											19.5043	290.935	0	0	0	0.00639739	Predicted resistant	51	26	220	1167	119	423	542	10	136	9	291	410	489	196	86	4156	26	327	62	11	166	70	44	72	216	55
DMS454_LUNG	DMS454	lung	carcinoma	small_cell_carcinoma		Lung:SCLC											20.976	178.238	0	0	0	0.000509115	Predicted resistant	4	2	135	558	217	216	1772	37	68	3	179	756	1147	220	148	492	17	126	25	15	417	1	24	62	242	66
KMRC2_KIDNEY	KMRC2	kidney	carcinoma	clear_cell_renal_cell_carcinoma		Kidney:Carcinoma	0.05	-27.4015	Resistant							Resistant	1344	758.68	1	1	1	0.473804	Predicted resistant	77	5	1125	148	473	720	2794	517	76	32	759	78	1146	192	130	227	24	633	1059	8	168	2139	23	3198	179	41
NCIH2081_LUNG	NCIH2081	lung	carcinoma	small_cell_carcinoma		Lung:SCLC											25.1942	242.149	0	0	0	0.00270942	Predicted resistant	29	6	86	276	129	415	903	43	67	3	243	971	350	163	137	67	11	133	22	10	336	4	85	15	135	116
NCIH69_LUNG	NCIH69	lung	carcinoma	small_cell_carcinoma		Lung:SCLC							0.0001	19.977	Resistant	Resistant	26.2087	35.5684	0	0	0	0.000958305	Predicted resistant	221	35	164	487	163	285	786	5	77	6	36	742	367	110	28	157	37	392	10	5	197	4	56	320	196	137
SKNFI_AUTONOMIC_GANGLIA	SKNFI	autonomic_ganglia	neuroblastoma			CNS:Neuroblastoma	0.05	13.9913	Resistant							Resistant	27.1534	19.6555	0	0	0	0.00104693	Predicted resistant	105	43	115	55	84	280	1208	14	143	26	20	17	181	193	84	6184	50	158	33	21	165	5	99	9	228	98
CORL311_LUNG	CORL311	lung	carcinoma	small_cell_carcinoma		Lung:SCLC											29.1386	0.5667	0	0	0	0.00128211	Predicted resistant	38	2	165	762	175	346	929	14	104	8	1	323	195	275	140	18	42	284	2	7	133	558	126	12	199	205
EJM_HAEMATOPOIETIC_AND_LYMPHOID_TISSUE	EJM	haematopoietic_and_lymphoid_tissue	lymphoid_neoplasm	plasma_cell_myeloma		Lymphoma:Multiple_Myeloma											30.6715	753.752	0	1	0	0.00191784	Predicted resistant	97	26	140	752	405	212	1095	6436	39	202	754	562	2611	109	85	736	38	174	1138	5	329	101	23	2	1485	65
MC116_HAEMATOPOIETIC_AND_LYMPHOID_TISSUE	MC116	haematopoietic_and_lymphoid_tissue	lymphoid_neoplasm	B_cell_lymphoma_unspecified		Lymphoma:NH_B_cell	0.05	27.6005	Resistant				0.0001	27.8717	Resistant	Resistant	125.298	390.683	0	0	0	0.0100193	Predicted resistant	88	4	138	454	225	276	990	6745	58	20	391	418	1393	236	158	192	67	412	1124	2	365	466	40	15	320	57
NCIH1092_LUNG	NCIH1092	lung	carcinoma	small_cell_carcinoma		Lung:SCLC											36.5599	24.7057	0	0	0	0.00076252	Predicted resistant	29	4	101	776	112	322	771	3	157	22	25	1209	134	255	209	139	13	167	4	9	360	120	139	25	108	84
CORL95_LUNG	CORL95	lung	carcinoma	small_cell_carcinoma		Lung:SCLC											41.6752	344.809	0	0	0	0.00576956	Predicted resistant	41	5	148	1570	306	273	980	34	77	7	345	1539	447	177	154	1176	31	220	35	2	277	5	146	241	218	138
NCIH2066_LUNG	NCIH2066	lung	carcinoma	small_cell_carcinoma		Lung:SCLC											48.1463	19.2489	0	0	0	0.000480492	Predicted resistant	56	3	403	12	133	360	1050	36	71	4	20	741	809	203	34	161	47	425	9	16	149	24	15	106	284	64
CORL47_LUNG	CORL47	lung	carcinoma	small_cell_carcinoma		Lung:SCLC	0.05	-25.8761	Resistant							Resistant	16.2327	248.615	0	0	0	0.000825414	Predicted resistant	56	23	165	447	156	283	814	22	44	15	249	1904	689	182	173	4586	15	219	24	15	223	1	115	13	200	146
BEN_LUNG	BEN	lung	carcinoma			Lung:Others											56.1249	242.579	0	0	0	0.0111765	Predicted resistant	95	23	154	439	230	258	721	19	68	15	243	99	407	240	84	749	17	310	22	17	685	42	61	274	314	175
NCIH2227_LUNG	NCIH2227	lung	carcinoma	small_cell_carcinoma		Lung:SCLC											58.91	286.059	0	0	0	0.00322052	Predicted resistant	16	13	91	65	165	333	671	6	295	29	286	540	501	228	127	2179	22	443	20	16	171	5	273	28	152	282
SUPB15_HAEMATOPOIETIC_AND_LYMPHOID_TISSUE	SUPB15	haematopoietic_and_lymphoid_tissue	lymphoid_neoplasm	acute_lymphoblastic_B_cell_leukaemia	Ph_positive	Leukemia:ALL							0.0001	4.18994	Resistant	Resistant	60.1075	307.938	0	0	0	0.027012	Predicted resistant	116	4	416	408	140	396	829	5	80	64	308	13	391	177	72	579	39	531	20	7	177	1154	72	15	161	121
NCIH1876_LUNG	NCIH1876	lung	carcinoma	small_cell_carcinoma		Lung:SCLC											61.4071	108.739	0	0	0	0.000890153	Predicted resistant	12	5	221	323	188	177	983	10	139	5	109	1483	322	200	323	1187	41	174	93	14	206	233	137	12	132	120
NCIH1618_LUNG	NCIH1618	lung	carcinoma	small_cell_carcinoma		Lung:SCLC											62.3501	147.375	0	0	0	0.00418107	Predicted resistant	133	6	223	360	209	286	637	9	127	21	148	605	387	312	108	560	52	347	49	17	181	4	65	74	204	175
SKNBE2_AUTONOMIC_GANGLIA	SKNBE2	autonomic_ganglia	neuroblastoma			CNS:Neuroblastoma	0.05	8.58941	Resistant							Resistant	63.5457	16.8153	0	0	0	0.00304847	Predicted resistant	225	21	136	294	72	747	962	4	126	13	17	49	101	169	90	2320	7	273	19	4	293	2356	31	1	210	98
NCIH2196_LUNG	NCIH2196	lung	carcinoma	small_cell_carcinoma		Lung:SCLC											68.2287	442.991	0	0	0	0.00773323	Predicted resistant	101	20	308	595	289	282	929	44	39	13	443	988	607	325	61	266	4	313	14	11	216	27	54	4598	223	151
SNB19_CENTRAL_NERVOUS_SYSTEM	SNB19	central_nervous_system	glioma	astrocytoma_Grade_IV	glioblastoma_multiforme	CNS:Glioma_HighGrade	0.05	-25.4804	Resistant				0.0001	4.36471	Resistant	Resistant	702.179	246.314	0	0	0	0.0277884	Predicted resistant	166	21	247	37	266	215	2445	113	70	7	247	6	521	183	201	2484	107	697	283	1	112	2	28	2782	322	61
SW1353_BONE	SW1353	bone	chondrosarcoma			Bone:Sarcoma_Chondro	0.05	-25.4616	Resistant							Resistant	827.018	261.929	0	0	0	0.0795819	Predicted resistant	160	24	343	72	187	251	3403	11	71	23	262	84	277	116	164	603	24	739	566	17	148	53	33	20	225	64
KASUMI6_HAEMATOPOIETIC_AND_LYMPHOID_TISSUE	KASUMI6	haematopoietic_and_lymphoid_tissue	haematopoietic_neoplasm	acute_myeloid_leukaemia	M2	Leukemia:AML											86.1381	858.554	0	1	0	0.230554	Predicted resistant	88	17	120	1177	157	1034	982	16	178	81	859	107	656	118	176	349	5	235	271	5	226	226	59	1782	150	141
NCIH889_LUNG	NCIH889	lung	carcinoma	small_cell_carcinoma		Lung:SCLC											86.0766	115.226	0	0	0	0.0131951	Predicted resistant	100	3	289	1543	125	561	766	6	76	17	116	768	323	151	125	197	9	287	37	14	204	4	66	26	122	160
UT7_HAEMATOPOIETIC_AND_LYMPHOID_TISSUE	UT7	haematopoietic_and_lymphoid_tissue	haematopoietic_neoplasm	acute_myeloid_leukaemia	M7	Leukemia:AML											90.0632	1001.64	0	1	0	0.226234	Predicted resistant	32	2	75	276	206	507	1794	47	232	155	1002	10	752	277	181	113	21	340	16	10	184	17	21	319	178	227
AML193_HAEMATOPOIETIC_AND_LYMPHOID_TISSUE	AML193	haematopoietic_and_lymphoid_tissue	haematopoietic_neoplasm	acute_myeloid_leukaemia	M5	Leukemia:AML											92.0323	594.532	0	1	0	0.0526781	Predicted resistant	157	18	223	469	117	396	807	56	97	47	595	492	1735	135	140	284	39	184	260	17	255	538	47	4596	116	104
CMK115_HAEMATOPOIETIC_AND_LYMPHOID_TISSUE	CMK115	haematopoietic_and_lymphoid_tissue	haematopoietic_neoplasm	acute_myeloid_leukaemia	M7	Leukemia:AML	0.05	7.40414	Resistant							Resistant	97.0283	1230.78	0	1	0	0.0800329	Predicted resistant	73	16	250	27	190	511	1354	177	208	44	1231	17	1075	221	115	137	28	469	9	2	209	20	39	103	199	82
HUT78_HAEMATOPOIETIC_AND_LYMPHOID_TISSUE	HUT78	haematopoietic_and_lymphoid_tissue	lymphoid_neoplasm	mycosis_fungoides-Sezary_syndrome		Lymphoma:NH_T_cell											96.6602	388.727	0	0	0	0.0308211	Predicted resistant	182	7	221	61	194	633	2065	3308	144	28	389	8	1289	161	290	41	117	898	1971	111	179	6	58	11	244	108
HCC1937_BREAST	HCC1937	breast	carcinoma	ductal_carcinoma		Breast:Carcinoma	0.05	-25.4198	Resistant							Resistant	349.083	389.628	0	0	0	0.0137915	Predicted resistant	38	6	322	12	333	660	1483	476	43	50	390	1025	1160	107	85	2054	42	699	315	11	207	40	21	51	563	59
HS571T_OVARY	HS571T	ovary	carcinoma			Ovary:Carcinoma	0.05	-24.5777	Resistant							Resistant	1886	224.957	1	0	0	0.0620231	Predicted resistant	122	3	233	14	384	259	1591	26	130	9	225	53	890	94	122	923	28	926	1576	2	111	16	32	10	265	79
IMR32_AUTONOMIC_GANGLIA	IMR32	autonomic_ganglia	neuroblastoma			CNS:Neuroblastoma	0.05	-23.8207	Resistant				0.0001	2.13556	Resistant	Resistant	1070.52	3.1606	1	0	0	0.278361	Predicted resistant	119	17	308	426	145	558	649	1	160	17	4	20	29	246	127	153	72	208	24	17	177	316	54	2	213	106
KMS34_HAEMATOPOIETIC_AND_LYMPHOID_TISSUE	KMS34	haematopoietic_and_lymphoid_tissue	lymphoid_neoplasm	plasma_cell_myeloma		Lymphoma:Multiple_Myeloma	0.05	21.2154	Resistant							Resistant	106.765	1083.64	0	1	0	0.00594692	Predicted resistant	115	13	120	117	167	101	1053	84	40	102	1084	747	2134	147	91	337	58	620	592	23	268	424	82	8	265	54
HCC1599_BREAST	HCC1599	breast	carcinoma	ductal_carcinoma		Breast:Carcinoma											108.918	290.728	0	0	0	0.021013	Predicted resistant	21	39	45	293	97	762	1339	20	60	11	291	558	593	165	58	604	29	407	53	1	142	202	30	61	330	64
DND41_HAEMATOPOIETIC_AND_LYMPHOID_TISSUE	DND41	haematopoietic_and_lymphoid_tissue	lymphoid_neoplasm	acute_lymphoblastic_T_cell_leukaemia		Leukemia:ALL				10	11	Resistant				Resistant	119.668	1143.83	0	1	0	0.0371624	Predicted resistant	119	15	130	1089	636	337	876	39	136	84	1144	536	488	169	208	1125	39	672	173	15	263	21	42	3	258	103
BL41_HAEMATOPOIETIC_AND_LYMPHOID_TISSUE	BL41	haematopoietic_and_lymphoid_tissue	lymphoid_neoplasm	Burkitt_lymphoma		Lymphoma:NH_B_cell	0.05	28.4727	Resistant							Resistant	121.522	404.356	0	0	0	0.0669305	Predicted resistant	161	2	225	179	80	275	851	545	80	2	405	441	297	321	70	97	95	350	9	3	475	412	66	8	179	72
MDAMB231_BREAST	MDAMB231	breast	carcinoma			Breast:Carcinoma				10	49.4	Resistant	0.0001	32.4615	Resistant	Resistant	1269.01	355.962	1	0	0	0.221116	Predicted resistant	132	12	231	38	828	393	3330	324	83	12	356	29	1080	125	68	714	78	1111	86	11	104	51	54	165	375	104
THP1_HAEMATOPOIETIC_AND_LYMPHOID_TISSUE	THP1	haematopoietic_and_lymphoid_tissue	haematopoietic_neoplasm	acute_myeloid_leukaemia	M5	Leukemia:AML	0.05	2.32984	Resistant				0.0001	3.032	Resistant	Resistant	143.871	521.645	0	1	0	0.0988727	Predicted resistant	68	8	139	1137	70	543	1235	24	29	22	522	4	508	110	47	1247	27	520	28	17	167	13	25	177	209	78
JHH7_LIVER	JHH7	liver	carcinoma	hepatocellular_carcinoma		Liver:HCC	0.05	-23.8173	Resistant							Resistant	1211.76	205.095	1	0	0	0.412709	Predicted resistant	83	6	196	26	181	804	1368	11	56	35	206	148	292	111	37	78	40	3669	16	16	170	15	56	23	266	66
HS274T_BREAST	HS274T	breast	carcinoma			Breast:Carcinoma											1771.63	147.959	1	0	0	0.0350297	Predicted resistant	106	19	303	19	271	274	2108	11	120	17	148	44	703	120	147	1390	37	576	1553	8	174	20	32	7	361	58
NCIH211_LUNG	NCIH211	lung	carcinoma	small_cell_carcinoma		Lung:SCLC											130.39	295.731	0	0	0	0.0289977	Predicted resistant	119	5	294	1532	145	302	2694	24	38	8	296	75	375	180	33	327	79	1205	35	13	703	2287	26	7	460	88
HMC18_BREAST	HMC18	breast	carcinoma			Breast:Carcinoma	0.05	-1.90147	Resistant	10	1.2	Resistant				Resistant	1667.53	367.382	1	0	0	0.131121	Predicted resistant	143	32	204	46	93	199	3371	15	67	9	368	16	1122	254	113	8352	79	560	14	4	101	201	51	223	377	57
NCIH1703_LUNG	NCIH1703	lung	carcinoma	adenocarcinoma		Lung:NSCLC_Adeno	0.000182856	79.166	Sensitive	0.0200667	80	Sensitive				Sensitive	404.318	445.745	0	0	0	0.0244444	Predicted resistant	86	31	177	40	112	275	2919	1063	154	10	446	634	404	148	43	1492	61	397	158	10	159	414	38	24	459	49
COLO800_SKIN	COLO800	skin	malignant_melanoma			Skin:Melanoma	0.000551656	88.8296	Sensitive				9.5445e-06	87.6587	Sensitive	Sensitive	1172.57	343.801	1	0	0	0.325185	Predicted resistant	91	10	109	77	152	327	1421	30	41	12	344	18	680	162	61	375	32	585	136	7	69	45	35	2147	391	62
P12ICHIKAWA_HAEMATOPOIETIC_AND_LYMPHOID_TISSUE	P12ICHIKAWA	haematopoietic_and_lymphoid_tissue	lymphoid_neoplasm	acute_lymphoblastic_T_cell_leukaemia		Leukemia:ALL	8.15475e-05	101.809	Sensitive							Sensitive	143.176	534.387	0	1	0	0.0745659	Predicted resistant	52	26	96	344	260	410	681	153	86	48	535	13	226	235	26	165	47	348	223	14	494	8	43	12	303	92
SNGM_ENDOMETRIUM	SNGM	endometrium	carcinoma	adenocarcinoma		Endometrium:Carcinoma	0.05	0.0195801	Resistant				0.0001	2.32981	Resistant	Resistant	3200.51	1050.14	1	1	1	0.64891	Predicted sensitive	62	27	696	43	646	412	3258	673	84	43	1050	130	1503	150	127	547	53	654	1769	9	242	1377	30	582	263	28
CMK_HAEMATOPOIETIC_AND_LYMPHOID_TISSUE	CMK	haematopoietic_and_lymphoid_tissue	haematopoietic_neoplasm	acute_myeloid_leukaemia	M7	Leukemia:AML											151.007	770.406	0	1	0	0.128249	Predicted resistant	44	20	186	53	312	650	1446	90	268	84	771	3	863	195	259	1409	18	386	7	14	109	131	28	428	254	105
NCIH82_LUNG	NCIH82	lung	carcinoma	small_cell_carcinoma		Lung:SCLC	0.05	8.95692	Resistant							Resistant	153.563	9.9072	0	0	0	0.000979219	Predicted resistant	83	24	376	14	106	171	306	4	216	11	10	422	182	270	52	56	20	165	6	9	122	106	46	2	348	64
DMS273_LUNG	DMS273	lung	carcinoma	small_cell_carcinoma		Lung:SCLC	0.05	-22.626	Resistant							Resistant	616.196	101.803	0	0	0	0.0169141	Predicted resistant	31	9	171	90	106	361	638	1	98	17	102	1190	201	228	153	3316	22	182	163	11	122	948	94	8	202	76
A204_SOFT_TISSUE	A204	soft_tissue	rhabdoid_tumour			Soft_Tissue:Sarcoma_Rhabdoid	0.05	-22.5726	Resistant							Resistant	1337.07	293.224	1	0	0	0.0223586	Predicted resistant	78	3	248	14	78	138	2762	37	47	8	294	53	835	103	38	2374	31	448	1076	13	112	4	17	14	273	73
SNU283_LARGE_INTESTINE	SNU283	large_intestine	carcinoma			Colorectal:Carcinoma											555.655	1004.2	0	1	0	0.591076	Predicted sensitive	93	14	206	39	284	530	640	32	135	75	1004	113	896	269	68	1794	42	340	249	38	139	3	28	23	278	92
KG1_HAEMATOPOIETIC_AND_LYMPHOID_TISSUE	KG1	haematopoietic_and_lymphoid_tissue	haematopoietic_neoplasm	acute_myeloid_leukaemia	M6	Leukemia:AML							0.0001	18.573	Resistant	Resistant	160.97	1182.16	0	1	0	0.285979	Predicted resistant	182	3	106	494	114	583	1402	141	116	55	1182	43	1242	170	155	33	22	619	223	18	115	524	42	669	175	115
BT474_BREAST	BT474	breast	carcinoma	ductal_carcinoma		Breast:Carcinoma							0.0001	2.27197	Resistant	Resistant	161.211	724.171	0	1	0	0.0983844	Predicted resistant	103	5	45	200	178	363	1916	18	81	14	725	21	540	316	64	801	31	866	10	4	112	10	27	7	1369	56
KYO1_HAEMATOPOIETIC_AND_LYMPHOID_TISSUE	KYO1	haematopoietic_and_lymphoid_tissue	haematopoietic_neoplasm	blast_phase_chronic_myeloid_leukaemia		Leukemia:CML	0.05	-22.3374	Resistant							Resistant	755.496	431.469	0	0	0	0.0293066	Predicted resistant	88	7	124	47	702	295	840	11	206	149	432	4	4131	122	19	2206	32	335	59	1	168	8	3	32	587	120
MHHCALL3_HAEMATOPOIETIC_AND_LYMPHOID_TISSUE	MHHCALL3	haematopoietic_and_lymphoid_tissue	lymphoid_neoplasm	acute_lymphoblastic_B_cell_leukaemia		Leukemia:ALL											165.66	735.304	0	1	0	0.546945	Predicted sensitive	89	27	156	832	125	880	524	1	109	77	736	11	207	221	172	322	22	241	34	14	2147	1444	90	2	160	139
HUH6_LIVER	HUH6	liver	other	hepatoblastoma		Liver:Hepatoblastoma											165.893	543.167	0	1	0	0.0115586	Predicted resistant	35	14	110	18	265	64	1512	1	122	34	543	111	813	174	50	633	46	291	7	7	207	4	34	26	466	23
AU565_BREAST	AU565	breast	carcinoma			Breast:Carcinoma	0.05	16.7918	Resistant							Resistant	166.704	389.447	0	0	0	0.0370836	Predicted resistant	83	24	86	2	177	329	708	37	40	15	390	95	845	197	61	1024	68	355	1	19	119	55	22	26	425	112
TEN_ENDOMETRIUM	TEN	endometrium	carcinoma	clear_cell_carcinoma		Endometrium:Carcinoma	0.05	45.7059	Resistant							Resistant	849.351	755.774	0	1	0	0.0746988	Predicted resistant	62	2	156	5	314	403	1640	2063	79	53	756	595	969	230	88	4990	54	569	654	22	193	712	40	2674	773	56
PCM6_HAEMATOPOIETIC_AND_LYMPHOID_TISSUE	PCM6	haematopoietic_and_lymphoid_tissue	lymphoid_neoplasm	plasma_cell_myeloma		Lymphoma:Multiple_Myeloma											172.805	280.745	0	0	0	0.0692546	Predicted resistant	137	2	353	2038	298	284	1615	295	46	64	281	319	289	58	48	110	118	614	68	1	137	4	28	673	865	117
VCAP_PROSTATE	VCAP	prostate	carcinoma	adenocarcinoma		Prostate											173.662	273.364	0	0	0	0.0164913	Predicted resistant	129	7	81	16	213	147	882	74	125	11	274	23	564	195	52	220	59	273	1355	10	104	63	26	23	266	63
NCIH146_LUNG	NCIH146	lung	carcinoma	small_cell_carcinoma		Lung:SCLC											175.746	67.6164	0	0	0	0.00237569	Predicted resistant	89	28	237	413	214	410	689	13	136	21	68	876	823	172	71	95	84	426	127	18	314	5	130	21	135	116
MCF7_BREAST	MCF7	breast	carcinoma			Breast:Carcinoma	0.05	11.4784	Resistant				0.0001	13.8746	Resistant	Resistant	510.93	176.582	0	0	0	0.0347249	Predicted resistant	151	11	250	761	75	275	574	11	76	4	177	9	605	165	18	580	33	879	105	7	126	15	27	8	343	91
DMS53_LUNG	DMS53	lung	carcinoma	small_cell_carcinoma		Lung:SCLC											182.001	234.452	0	0	0	0.0376521	Predicted resistant	68	15	186	1400	128	331	1530	31	102	3	235	177	576	98	66	100	25	682	44	20	146	212	48	6555	184	71
HUG1N_STOMACH	HUG1N	stomach	carcinoma			Gastric:Carcinoma	8.0386e-05	94.5228	Sensitive				1.8548e-06	97.006	Sensitive	Sensitive	1490.57	635.266	1	1	1	0.305664	Predicted resistant	51	17	92	1	283	378	1042	84	71	36	636	22	879	136	12	3354	58	473	1147	19	113	1	28	93	451	112
MDST8_LARGE_INTESTINE	MDST8	large_intestine	carcinoma	adenocarcinoma		Colorectal:Carcinoma	0.000318544	73.4031	Sensitive	0.025	76	Sensitive				Sensitive	4460.93	1019.2	1	1	1	0.356707	Predicted resistant	131	3	854	88	410	559	2460	60	71	23	1019	91	2029	138	199	804	14	1143	887	9	103	3	31	8990	269	77
NCIH660_PROSTATE	NCIH660	prostate	carcinoma	small_cell_carcinoma		Prostate											185.722	206.974	0	0	0	0.00473762	Predicted resistant	86	30	142	1054	99	182	1111	27	47	18	207	632	770	213	28	1415	70	250	99	12	114	72	84	167	172	56
RERFLCAI_LUNG	RERFLCAI	lung	carcinoma	squamous_cell_carcinoma		Lung:NSCLC_Squamous	0.05	3.95479	Resistant	10	7	Resistant				Resistant	430.192	967.596	0	1	0	0.0376999	Predicted resistant	118	31	214	34	154	409	3459	458	71	24	968	284	2388	246	183	1655	98	1024	248	9	78	50	80	36	146	38
HEC1A_ENDOMETRIUM	HEC1A	endometrium	carcinoma	adenocarcinoma		Endometrium:Carcinoma	0.05	-8.92336	Resistant							Resistant	1866.51	598.953	1	1	1	0.122518	Predicted resistant	65	5	165	38	438	462	1288	287	94	13	599	154	1211	219	93	4263	140	709	1234	8	157	844	34	147	302	41
JHUEM3_ENDOMETRIUM	JHUEM3	endometrium	carcinoma	adenocarcinoma		Endometrium:Carcinoma											1435.27	554.089	1	1	1	0.188205	Predicted resistant	72	22	116	75	295	444	1772	980	99	23	554	13	1258	196	161	2890	62	1059	833	10	185	1711	37	4564	286	53
HCC202_BREAST	HCC202	breast	carcinoma	ductal_carcinoma		Breast:Carcinoma											204.733	497.34	0	0	0	0.036726	Predicted resistant	235	32	233	9	362	242	784	32	88	18	498	151	703	87	80	2286	20	414	32	4	132	1	37	89	244	98
ME1_HAEMATOPOIETIC_AND_LYMPHOID_TISSUE	ME1	haematopoietic_and_lymphoid_tissue	haematopoietic_neoplasm	acute_myeloid_leukaemia	M4	Leukemia:AML											204.779	525.24	0	1	0	0.551971	Predicted sensitive	120	7	192	1940	163	536	700	21	142	62	526	71	230	80	77	97	7	1089	39	8	137	1419	74	139	174	185
KE37_HAEMATOPOIETIC_AND_LYMPHOID_TISSUE	KE37	haematopoietic_and_lymphoid_tissue	lymphoid_neoplasm	acute_lymphoblastic_leukaemia		Leukemia:ALL											209.138	748.188	0	1	0	0.192231	Predicted resistant	55	5	95	236	226	425	1103	224	101	102	748	15	461	393	270	60	31	358	427	10	515	57	117	8	187	83
L1236_HAEMATOPOIETIC_AND_LYMPHOID_TISSUE	L1236	haematopoietic_and_lymphoid_tissue	lymphoid_neoplasm	Hodgkin_lymphoma		Lymphoma:Hodgkin											209.994	481.26	0	0	0	0.00302089	Predicted resistant	80	55	244	353	736	235	1675	4400	88	22	482	968	3357	109	150	602	51	592	3116	10	97	3	101	8	446	85
JM1_HAEMATOPOIETIC_AND_LYMPHOID_TISSUE	JM1	haematopoietic_and_lymphoid_tissue	lymphoid_neoplasm	B_cell_lymphoma_unspecified		Lymphoma:NH_B_cell							0.0001	2.83688	Resistant	Resistant	211.401	229.646	0	0	0	0.0480142	Predicted resistant	182	3	100	2	161	156	951	48	142	8	230	1	86	286	88	45	38	219	59	25	202	3	125	13	264	63
KYSE520_OESOPHAGUS	KYSE520	oesophagus	carcinoma	squamous_cell_carcinoma		Oesophagus:Carcinoma	0.05	-21.3999	Resistant							Resistant	417.927	161.226	0	0	0	0.0523582	Predicted resistant	38	5	337	35	213	614	799	27	148	24	162	336	163	186	135	2258	32	631	220	32	155	340	17	693	368	42
NCIH1184_LUNG	NCIH1184	lung	carcinoma	small_cell_carcinoma		Lung:SCLC											214.42	1.4149	0	0	0	0.00307664	Predicted resistant	113	6	199	124	72	206	1440	2	95	10	2	940	187	171	105	176	35	280	22	16	177	5	45	14	200	78
BT483_BREAST	BT483	breast	carcinoma	ductal_carcinoma	medullary	Breast:Carcinoma											219.314	299.388	0	0	0	0.0373937	Predicted resistant	67	8	193	50	356	315	852	13	145	7	300	20	351	271	96	1607	31	235	40	14	229	51	15	11	469	104
SUDHL6_HAEMATOPOIETIC_AND_LYMPHOID_TISSUE	SUDHL6	haematopoietic_and_lymphoid_tissue	lymphoid_neoplasm	diffuse_large_B_cell_lymphoma		Lymphoma:NH_B_cell							0.0001	22.0884	Resistant	Resistant	223.981	368.639	0	0	0	0.110557	Predicted resistant	108	1	309	6	81	78	1285	1937	45	10	369	386	55	457	53	1060	88	385	30	2	355	8	55	28	305	89
HEC50B_ENDOMETRIUM	HEC50B	endometrium	carcinoma	adenocarcinoma		Endometrium:Carcinoma	0.05	33.9718	Resistant							Resistant	3374.61	775.463	1	1	1	0.382924	Predicted resistant	122	21	146	25	264	219	3159	141	75	22	776	6	2094	151	73	143	115	558	425	24	186	680	48	404	598	29
P3HR1_HAEMATOPOIETIC_AND_LYMPHOID_TISSUE	P3HR1	haematopoietic_and_lymphoid_tissue	lymphoid_neoplasm	Burkitt_lymphoma		Lymphoma:NH_B_cell	0.05	-21.1723	Resistant							Resistant	372.596	275.966	0	0	0	0.177385	Predicted resistant	107	18	185	15	74	396	1109	861	46	1	276	200	182	327	77	145	115	554	257	3	216	315	112	27	152	70
U266B1_HAEMATOPOIETIC_AND_LYMPHOID_TISSUE	U266B1	haematopoietic_and_lymphoid_tissue	lymphoid_neoplasm	plasma_cell_myeloma		Lymphoma:Multiple_Myeloma	0.05	-20.5392	Resistant							Resistant	125.366	1284.74	0	1	0	0.017822	Predicted resistant	107	7	181	645	662	250	434	2528	79	95	1285	99	2547	137	115	2654	45	316	285	15	248	823	43	20	394	106
NCIH526_LUNG	NCIH526	lung	carcinoma	small_cell_carcinoma		Lung:SCLC							0.0001	7.42905	Resistant	Resistant	239.308	95.6499	0	0	0	0.0195773	Predicted resistant	174	16	329	832	197	246	1883	14	96	8	96	687	258	288	72	36	11	338	37	22	245	603	78	8	205	156
SUPT1_HAEMATOPOIETIC_AND_LYMPHOID_TISSUE	SUPT1	haematopoietic_and_lymphoid_tissue	lymphoid_neoplasm	acute_lymphoblastic_T_cell_leukaemia		Leukemia:ALL				10	0	Resistant				Resistant	241.505	460.452	0	0	0	0.136692	Predicted resistant	104	18	27	173	171	551	1012	25	48	22	461	19	320	65	30	136	63	785	184	15	175	6	21	19	301	50
HEC6_ENDOMETRIUM	HEC6	endometrium	carcinoma	adenocarcinoma		Endometrium:Carcinoma	0.05	0.45188	Resistant				2.46087e-05	71.2814	Sensitive	Intermediate	2005.48	443.909	1	0	0	0.374868	Predicted resistant	51	12	387	19	285	585	3418	526	62	9	444	1	562	81	171	106	62	997	937	11	170	2	46	21	308	41
HEC1B_ENDOMETRIUM	HEC1B	endometrium	carcinoma	adenocarcinoma		Endometrium:Carcinoma																0.144905	Predicted resistant	22	3	167	42	290	302	1335	439	107	3	398	95	674	193	164	4519	40	229	2090	3	93	1342	22	15	329	48
ZR7530_BREAST	ZR7530	breast	carcinoma	ductal_carcinoma		Breast:Carcinoma	0.05	-20.1489	Resistant							Resistant	363.041	138.45	0	0	0	0.00955203	Predicted resistant	80	3	77	143	292	204	433	15	141	1	139	19	290	258	193	6174	34	242	45	10	150	25	49	13	258	96
NCIH1781_LUNG	NCIH1781	lung	carcinoma	bronchioloalveolar_adenocarcinoma		Lung:NSCLC_Adeno	0.05	35.2946	Resistant							Resistant	257.569	520.264	0	1	0	0.0265821	Predicted resistant	72	121	46	17	241	371	1029	87	69	34	521	838	448	116	22	1461	179	380	575	19	166	808	28	4776	472	48
RPMI8226_HAEMATOPOIETIC_AND_LYMPHOID_TISSUE	RPMI8226	haematopoietic_and_lymphoid_tissue	lymphoid_neoplasm	plasma_cell_myeloma		Lymphoma:Multiple_Myeloma	0.05	5.70132	Resistant				0.0001	5.94277	Resistant	Resistant	182.464	1428.94	0	1	0	0.0519152	Predicted resistant	72	4	120	379	344	96	1066	104	32	78	1429	388	1237	70	122	24	52	496	212	8	101	760	62	64	374	93
RERFGC1B_STOMACH	RERFGC1B	stomach	carcinoma			Gastric:Carcinoma											260.063	219.417	0	0	0	0.0807899	Predicted resistant	63	9	190	18	188	635	1230	6	91	19	220	115	542	112	39	1323	54	855	14	17	155	28	18	2	652	57
EFM192A_BREAST	EFM192A	breast	carcinoma			Breast:Carcinoma	0.05	31.495	Resistant							Resistant	262.258	350.58	0	0	0	0.0171175	Predicted resistant	122	15	292	9	294	126	746	16	74	2	351	51	310	161	93	6048	82	1397	94	4	87	29	30	10	154	59
MHHCALL2_HAEMATOPOIETIC_AND_LYMPHOID_TISSUE	MHHCALL2	haematopoietic_and_lymphoid_tissue	lymphoid_neoplasm	acute_lymphoblastic_B_cell_leukaemia		Leukemia:ALL											264.815	562.612	0	1	0	0.285135	Predicted resistant	76	6	222	2803	85	263	519	4	102	62	563	2	157	271	201	741	26	260	72	11	387	668	91	7	205	87
COLO205_LARGE_INTESTINE	COLO205	large_intestine	carcinoma	adenocarcinoma		Colorectal:Carcinoma	3.53552e-05	95.1886	Sensitive	1e-05	99	Sensitive	4.89216e-06	99.9398	Sensitive	Sensitive	1142.72	939.145	1	1	1	0.680686	Predicted sensitive	111	27	167	2	240	611	942	82	66	30	939	161	1069	122	53	443	31	644	46	34	91	4	32	12	193	72
JHOS4_OVARY	JHOS4	ovary	carcinoma	adenocarcinoma		Ovary:Carcinoma											266.214	439.796	0	0	0	0.193927	Predicted resistant	102	59	122	130	266	1317	2148	379	106	30	440	4	868	84	36	2451	41	1143	472	12	141	34	24	3126	687	55
HL60_HAEMATOPOIETIC_AND_LYMPHOID_TISSUE	HL60	haematopoietic_and_lymphoid_tissue	haematopoietic_neoplasm	acute_myeloid_leukaemia	M2	Leukemia:AML							0.0001	3.7234	Resistant	Resistant	267.531	678.352	0	1	0	0.16802	Predicted resistant	86	6	213	552	92	567	520	54	63	49	679	54	969	118	172	89	34	446	115	24	239	964	60	4315	224	149
SUDHL10_HAEMATOPOIETIC_AND_LYMPHOID_TISSUE	SUDHL10	haematopoietic_and_lymphoid_tissue	lymphoid_neoplasm	diffuse_large_B_cell_lymphoma		Lymphoma:NH_B_cell	0.05	-30.4399	Resistant							Resistant	955.099	256.394	0	0	0	0.149654	Predicted resistant	86	13	115	27	63	226	1063	289	50	8	257	378	175	234	196	342	51	445	381	10	293	18	40	4	150	122
SW48_LARGE_INTESTINE	SW48	large_intestine	carcinoma	adenocarcinoma		Colorectal:Carcinoma	0.000510387	88.0141	Sensitive	1e-05	84	Sensitive				Sensitive	4250.13	590.29	1	1	1	0.898592	Predicted sensitive	41	5	101	134	366	577	1506	50	86	16	591	20	330	186	28	3597	151	349	393	14	178	4	22	12	294	56
RCC10RGB_KIDNEY	RCC10RGB	kidney	carcinoma	renal_cell_carcinoma		Kidney:Carcinoma	0.05	-19.9221	Resistant	10	6	Resistant				Resistant	1275.22	861.126	1	1	1	0.270039	Predicted resistant	55	22	294	241	724	282	4985	1109	82	23	861	15	3243	129	342	235	46	564	1345	12	120	5036	26	4024	292	57
SKMM2_HAEMATOPOIETIC_AND_LYMPHOID_TISSUE	SKMM2	haematopoietic_and_lymphoid_tissue	lymphoid_neoplasm	plasma_cell_myeloma		Lymphoma:Multiple_Myeloma											280.878	1565.66	0	1	0	0.231444	Predicted resistant	61	35	173	6505	64	169	1434	43	102	120	1566	241	749	182	98	11	15	498	294	2	794	5	29	10	219	112
RERFLCKJ_LUNG	RERFLCKJ	lung	carcinoma	non_small_cell_carcinoma		Lung:NSCLC_Others											281.882	433.998	0	0	0	0.147982	Predicted resistant	73	17	76	2	235	705	1154	126	145	19	434	385	372	78	70	3365	49	288	293	1	81	2	36	62	319	45
MDAMB415_BREAST	MDAMB415	breast	carcinoma			Breast:Carcinoma	0.05	-19.5669	Resistant							Resistant	157.06	104.868	0	0	0	0.00236239	Predicted resistant	39	10	60	36	263	258	687	33	41	11	105	297	625	136	189	44	57	2258	71	2	305	45	75	51	212	93
TE9_OESOPHAGUS	TE9	oesophagus	carcinoma	squamous_cell_carcinoma		Oesophagus:Carcinoma											290.392	383.284	0	0	0	0.0579309	Predicted resistant	83	49	146	3	213	584	568	32	120	31	384	19	411	171	83	6087	53	3747	135	21	172	226	23	314	380	33
KARPAS620_HAEMATOPOIETIC_AND_LYMPHOID_TISSUE	KARPAS620	haematopoietic_and_lymphoid_tissue	lymphoid_neoplasm	plasma_cell_myeloma		Lymphoma:Multiple_Myeloma	0.05	32.8963	Resistant							Resistant	143.696	927.058	0	1	0	0.0909146	Predicted resistant	82	11	112	1462	99	166	987	37	63	66	927	82	299	184	165	485	33	529	78	15	211	241	57	20	250	86
KYSE140_OESOPHAGUS	KYSE140	oesophagus	carcinoma	squamous_cell_carcinoma		Oesophagus:Carcinoma											299.965	321.669	0	0	0	0.0602527	Predicted resistant	59	26	127	78	130	508	630	8	89	24	322	10	124	108	28	1707	31	2703	16	21	97	395	28	293	264	36
KNS42_CENTRAL_NERVOUS_SYSTEM	KNS42	central_nervous_system	glioma			CNS:Glioma											300.192	231.784	0	0	0	0.00924379	Predicted resistant	100	5	227	109	361	463	1717	46	137	21	232	221	1133	241	137	4376	45	489	1650	14	88	5	25	33	238	53
MDAMB175VII_BREAST	MDAMB175VII	breast	carcinoma	ductal_carcinoma		Breast:Carcinoma	0.05	-18.4064	Resistant	10	27.25	Resistant	1.34915e-06	96.1725	Sensitive	Resistant	851.958	380.24	0	0	0	0.469507	Predicted resistant	72	10	263	24	574	1154	451	9	108	14	381	34	279	179	82	1157	140	1712	54	9	100	52	27	79	262	123
SAOS2_BONE	SAOS2	bone	osteosarcoma			Bone:Sarcoma_Osteo											301.84	239.965	0	0	0	0.0624062	Predicted resistant	162	6	555	57	187	366	1470	6	77	19	240	1014	158	404	145	1683	77	290	238	1	172	233	36	4	553	42
HS746T_STOMACH	HS746T	stomach	carcinoma			Gastric:Carcinoma											303.384	363.368	0	0	0	0.0162194	Predicted resistant	198	5	170	34	242	261	2761	12	57	38	364	295	846	38	74	254	84	4310	1149	5	121	172	30	498	856	49
HCC38_BREAST	HCC38	breast	carcinoma	ductal_carcinoma		Breast:Carcinoma	0.000447372	55.7123	Intermediate							Intermediate	304.275	316.861	0	0	0	0.0824903	Predicted resistant	126	39	91	21	194	856	2827	189	20	13	317	9	583	151	77	5448	48	602	684	10	181	37	20	171	454	69
J82_URINARY_TRACT	J82	urinary_tract	carcinoma	transitional_cell_carcinoma		Bladder	0.05	9.37778	Resistant							Resistant	304.315	441.431	0	0	0	0.028786	Predicted resistant	118	44	372	32	543	303	1910	116	66	39	442	1411	995	65	94	4986	122	1187	76	3	26	3	43	252	727	69
UACC893_BREAST	UACC893	breast	carcinoma	ductal_carcinoma		Breast:Carcinoma											304.787	183.083	0	0	0	0.0135722	Predicted resistant	23	42	22	3	208	132	552	38	81	17	184	53	721	216	75	4529	64	1315	5	7	176	4	20	47	462	146
ECC10_STOMACH	ECC10	stomach	carcinoma	small_cell_adenocarcinoma		Gastric:Carcinoma											415.547	7.037	0	0	0	0.00531993	Predicted resistant	72	16	152	720	137	178	916	8	170	9	8	727	44	305	207	1805	22	296	133	49	195	3	49	3	215	153
TOLEDO_HAEMATOPOIETIC_AND_LYMPHOID_TISSUE	TOLEDO	haematopoietic_and_lymphoid_tissue	lymphoid_neoplasm	diffuse_large_B_cell_lymphoma		Lymphoma:NH_B_cell											245.833	160.225	0	0	0	0.0389452	Predicted resistant	174	16	217	2252	172	314	1671	911	59	15	161	78	125	149	107	28	69	746	103	1	270	86	69	26	318	71
COV318_OVARY	COV318	ovary	carcinoma			Ovary:Carcinoma											310.701	472.357	0	0	0	0.0107072	Predicted resistant	67	47	116	53	381	130	1561	291	105	45	473	1491	617	142	42	3839	93	350	117	2	98	11	36	762	708	42
RCHACV_HAEMATOPOIETIC_AND_LYMPHOID_TISSUE	RCHACV	haematopoietic_and_lymphoid_tissue	lymphoid_neoplasm	acute_lymphoblastic_leukaemia		Leukemia:ALL	0.05	36.4277	Resistant							Resistant	268.219	537.302	0	1	0	0.31256	Predicted resistant	73	2	144	1344	90	433	605	2	94	50	538	36	159	255	45	22	55	321	40	21	1491	1148	65	12	259	98
KMS20_HAEMATOPOIETIC_AND_LYMPHOID_TISSUE	KMS20	haematopoietic_and_lymphoid_tissue	lymphoid_neoplasm	plasma_cell_myeloma		Lymphoma:Multiple_Myeloma											298.524	677.782	0	1	0	0.0382255	Predicted resistant	63	37	149	529	112	280	1	1	144	102	678	221	1676	193	115	95	64	314	158	7	396	148	21	17	503	61
PFEIFFER_HAEMATOPOIETIC_AND_LYMPHOID_TISSUE	PFEIFFER	haematopoietic_and_lymphoid_tissue	lymphoid_neoplasm	diffuse_large_B_cell_lymphoma		Lymphoma:NH_B_cell											316.854	325.548	0	0	0	0.105229	Predicted resistant	112	22	154	16	297	1066	841	3729	80	4	326	107	1132	393	129	363	131	358	74	24	311	51	31	74	331	75
COLO699_LUNG	COLO699	lung	carcinoma	adenocarcinoma		Lung:NSCLC_Adeno	0.05	2.66374	Resistant							Resistant	330.722	99.0827	0	0	0	0.0303858	Predicted resistant	108	19	111	936	92	709	716	1	135	3	100	266	362	190	112	2773	18	960	15	14	154	52	67	13	198	109
NB4_HAEMATOPOIETIC_AND_LYMPHOID_TISSUE	NB4	haematopoietic_and_lymphoid_tissue	haematopoietic_neoplasm	acute_myeloid_leukaemia	M3	Leukemia:AML	0.05	0.328781	Resistant							Resistant	316.878	678.167	0	1	0	0.0712798	Predicted resistant	81	16	99	744	23	337	656	18	140	45	678	1	1546	403	196	1344	41	446	150	5	188	3	33	1583	203	107
NCIH929_HAEMATOPOIETIC_AND_LYMPHOID_TISSUE	NCIH929	haematopoietic_and_lymphoid_tissue	lymphoid_neoplasm	plasma_cell_myeloma		Lymphoma:Multiple_Myeloma											335.314	1784.31	0	1	0	0.0209442	Predicted resistant	139	2	174	145	145	251	1720	58	44	247	1784	43	1972	54	113	1132	40	476	108	5	267	314	38	4	806	67
KASUMI2_HAEMATOPOIETIC_AND_LYMPHOID_TISSUE	KASUMI2	haematopoietic_and_lymphoid_tissue	lymphoid_neoplasm	acute_lymphoblastic_leukaemia	L2	Leukemia:ALL	0.000215369	63.7274	Intermediate							Intermediate	392.388	712.03	0	1	0	0.604404	Predicted sensitive	89	29	159	817	125	731	449	1	97	41	712	63	284	163	151	34	20	227	141	9	760	543	65	2	142	130
MDAMB453_BREAST	MDAMB453	breast	carcinoma			Breast:Carcinoma	0.05	6.84713	Resistant				0.0001	2.81302	Resistant	Resistant	337.784	336.419	0	0	0	0.031496	Predicted resistant	122	3	189	6	290	240	1154	15	54	2	337	52	356	296	56	4158	50	1389	12	12	607	856	34	13	346	95
MONOMAC1_HAEMATOPOIETIC_AND_LYMPHOID_TISSUE	MONOMAC1	haematopoietic_and_lymphoid_tissue	haematopoietic_neoplasm	acute_myeloid_leukaemia	M5	Leukemia:AML	0.05	-18.3379	Resistant							Resistant	742.648	520.326	0	1	0	0.423457	Predicted resistant	35	3	191	1957	46	567	908	46	29	45	521	1192	693	153	284	2422	13	411	13	16	172	3	94	1614	134	149
SNU503_LARGE_INTESTINE	SNU503	large_intestine	carcinoma			Colorectal:Carcinoma											763.243	221.71	0	0	0	0.149481	Predicted resistant	56	4	250	92	118	419	573	26	104	40	222	218	340	128	83	3626	55	369	81	19	173	576	24	202	445	95
NCO2_HAEMATOPOIETIC_AND_LYMPHOID_TISSUE	NCO2	haematopoietic_and_lymphoid_tissue	haematopoietic_neoplasm	chronic_myeloid_leukaemia		Leukemia:CML											341.06	716.417	0	1	0	0.185421	Predicted resistant	67	5	243	337	245	825	1156	20	392	53	717	1631	894	99	70	2288	64	379	37	6	234	4	52	270	252	104
SNU182_LIVER	SNU182	liver	carcinoma	hepatocellular_carcinoma		Liver:HCC	0.05	0.56864	Resistant							Resistant	345.562	329.118	0	0	0	0.0123474	Predicted resistant	80	29	83	21	352	546	772	43	151	18	330	1100	645	142	55	5627	84	742	332	19	152	4	34	283	364	44
SKMEL30_SKIN	SKMEL30	skin	malignant_melanoma			Skin:Melanoma	0.05	-18.2906	Resistant				0.0001	9.33768	Resistant	Resistant	840.336	357.614	0	0	0	0.0481529	Predicted resistant	150	5	83	139	101	196	1028	9	106	11	358	599	536	129	35	1446	31	1306	77	14	77	3	65	890	342	48
MOTN1_HAEMATOPOIETIC_AND_LYMPHOID_TISSUE	MOTN1	haematopoietic_and_lymphoid_tissue	lymphoid_neoplasm	T_cell_large_granular_lymphocytic_leukaemia		Leukemia:ALL											350.705	1241.38	0	1	0	0.0855034	Predicted resistant	90	4	177	359	104	182	1550	135	112	262	1241	584	2375	93	486	17	12	407	906	1076	255	9	133	24	89	345
KOPN8_HAEMATOPOIETIC_AND_LYMPHOID_TISSUE	KOPN8	haematopoietic_and_lymphoid_tissue	lymphoid_neoplasm	acute_lymphoblastic_B_cell_leukaemia		Leukemia:ALL											566.77	803.332	0	1	0	0.475656	Predicted resistant	346	4	274	638	157	641	402	1	55	90	804	269	642	182	66	234	268	708	142	25	225	543	70	2	139	183
CHP212_AUTONOMIC_GANGLIA	CHP212	autonomic_ganglia	neuroblastoma			CNS:Neuroblastoma	9.50657e-05	79.6628	Sensitive				4.1275e-06	75.5906	Sensitive	Sensitive	1071.52	433.349	1	0	0	0.517934	Predicted sensitive	295	11	249	23	46	462	2210	33	159	12	434	64	229	174	130	665	17	536	153	4	150	405	59	21	179	85
MHHNB11_AUTONOMIC_GANGLIA	MHHNB11	autonomic_ganglia	neuroblastoma			CNS:Neuroblastoma	0.05	-17.8941	Resistant							Resistant	1402.66	33.14	1	0	0	0.0284271	Predicted resistant	94	29	113	169	126	102	1010	9	15	18	34	11	168	89	119	108	14	79	62	15	347	616	14	2	456	141
NCIH2342_LUNG	NCIH2342	lung	carcinoma	adenocarcinoma		Lung:NSCLC_Adeno											362.446	110.417	0	0	0	0.00358095	Predicted resistant	19	6	76	2	320	377	2027	184	93	17	111	127	1848	55	28	993	114	631	19	16	114	4	48	27	369	44
MOLT4_HAEMATOPOIETIC_AND_LYMPHOID_TISSUE	MOLT4	haematopoietic_and_lymphoid_tissue	lymphoid_neoplasm	acute_lymphoblastic_T_cell_leukaemia		Leukemia:ALL				10	0	Resistant	0.0001	4.13099	Resistant	Resistant	135.617	645.167	0	1	0	0.220423	Predicted resistant	133	4	190	90	176	695	1059	180	109	59	646	8	217	167	76	27	33	510	420	1	249	4	23	2	357	53
JVM2_HAEMATOPOIETIC_AND_LYMPHOID_TISSUE	JVM2	haematopoietic_and_lymphoid_tissue	lymphoid_neoplasm	mantle_cell_lymphoma		Lymphoma:NH_B_cell	0.05	-17.8701	Resistant							Resistant	976.599	602.886	1	1	1	0.0199992	Predicted resistant	111	21	292	1272	375	358	1744	3052	123	80	603	12	6049	182	460	507	64	274	3074	13	1118	18	161	50	420	67
A4FUK_HAEMATOPOIETIC_AND_LYMPHOID_TISSUE	A4FUK	haematopoietic_and_lymphoid_tissue	lymphoid_neoplasm	diffuse_large_B_cell_lymphoma		Lymphoma:NH_B_cell	0.000277568	68.2795	Intermediate							Intermediate	367.079	1694.62	0	1	0	0.143365	Predicted resistant	80	2	256	26	82	218	1289	188	55	121	1695	202	1809	119	107	5544	29	459	164	20	525	367	38	7	265	66
NCIH1568_LUNG	NCIH1568	lung	carcinoma	non_small_cell_carcinoma		Lung:NSCLC_Others	0.05	28.8919	Resistant							Resistant	366.717	285.272	0	0	0	0.0544396	Predicted resistant	55	26	126	13	169	343	1385	238	95	35	286	52	325	191	22	4302	68	585	97	3	388	116	30	26	652	70
RI1_HAEMATOPOIETIC_AND_LYMPHOID_TISSUE	RI1	haematopoietic_and_lymphoid_tissue	lymphoid_neoplasm	B_cell_lymphoma_unspecified		Lymphoma:NH_B_cell	0.05	30.6354	Resistant							Resistant	372.417	615.689	0	1	0	0.106811	Predicted resistant	106	3	250	6062	318	574	876	654	106	10	616	780	1080	269	127	2291	41	581	17	9	178	4	88	21	141	83
TF1_HAEMATOPOIETIC_AND_LYMPHOID_TISSUE	TF1	haematopoietic_and_lymphoid_tissue	haematopoietic_neoplasm	acute_myeloid_leukaemia	M6	Leukemia:AML	0.05	-17.8525	Resistant							Resistant	10.5912	749.639	0	1	0	0.0385207	Predicted resistant	63	4	117	101	363	532	814	2	187	84	750	1159	1045	167	100	56	42	487	15	15	102	343	26	13	329	67
JEKO1_HAEMATOPOIETIC_AND_LYMPHOID_TISSUE	JEKO1	haematopoietic_and_lymphoid_tissue	lymphoid_neoplasm	mantle_cell_lymphoma		Lymphoma:NH_B_cell	4.79541e-05	93.6884	Sensitive							Sensitive	373.842	607.675	0	1	0	0.10666	Predicted resistant	104	16	77	807	142	401	1383	469	149	26	608	325	545	181	142	849	18	535	8	12	438	503	39	8	221	187
HT115_LARGE_INTESTINE	HT115	large_intestine	carcinoma			Colorectal:Carcinoma	0.000155454	94.7889	Sensitive	0.007	99	Sensitive				Sensitive	2378.65	929.226	1	1	1	0.558438	Predicted sensitive	82	20	107	10	337	216	1029	508	78	69	929	260	783	182	20	1618	59	429	440	14	311	7	17	1719	237	90
MDAMB436_BREAST	MDAMB436	breast	carcinoma			Breast:Carcinoma	0.000132549	75.8251	Sensitive	0.001	80.05	Sensitive				Sensitive	1195.17	832.052	1	1	1	0.452398	Predicted resistant	61	14	258	44	260	616	1196	334	88	33	833	508	604	125	44	499	22	609	341	15	59	289	25	6872	631	70
NCIH1341_LUNG	NCIH1341	lung	carcinoma	small_cell_carcinoma		Lung:SCLC	0.05	1.43608	Resistant				0.0001	5.98785	Resistant	Resistant	513.252	132.404	0	0	0	0.149901	Predicted resistant	73	25	306	184	138	658	907	12	75	14	133	928	17	107	24	6268	39	428	168	2	172	631	82	79	220	65
MOGGCCM_CENTRAL_NERVOUS_SYSTEM	MOGGCCM	central_nervous_system	glioma	astrocytoma		CNS:Glioma											384.962	78.9525	0	0	0	0.00908199	Predicted resistant	110	28	435	63	135	394	833	44	74	24	79	1858	188	93	169	1240	8	310	648	7	80	24	62	15	339	50
RERFLCSQ1_LUNG	RERFLCSQ1	lung	carcinoma	squamous_cell_carcinoma		Lung:NSCLC_Squamous				10	29	Resistant				Resistant	385.401	473.919	0	0	0	0.03513	Predicted resistant	138	33	356	12	211	490	2625	719	67	22	474	10	1235	111	159	2125	50	741	657	19	95	1008	16	28	539	38
M059K_CENTRAL_NERVOUS_SYSTEM	M059K	central_nervous_system	glioma	astrocytoma_Grade_IV	glioblastoma_multiforme	CNS:Glioma_HighGrade											386.17	180.327	0	0	0	0.00808003	Predicted resistant	86	8	163	15	297	199	2991	127	70	2	181	536	386	72	60	3444	92	833	413	22	78	7	23	324	664	65
OAW28_OVARY	OAW28	ovary	carcinoma			Ovary:Carcinoma											387.571	321.748	0	0	0	0.00902022	Predicted resistant	29	4	194	101	323	265	1488	12	106	160	322	1378	1020	197	110	1913	78	209	63	16	167	20	79	80	477	21
NOMO1_HAEMATOPOIETIC_AND_LYMPHOID_TISSUE	NOMO1	haematopoietic_and_lymphoid_tissue	haematopoietic_neoplasm	acute_myeloid_leukaemia	M5	Leukemia:AML	9.82785e-05	90.606	Sensitive							Sensitive	719.484	765.668	0	1	0	0.632282	Predicted sensitive	74	24	265	504	53	558	813	38	96	61	766	23	402	171	125	61	23	422	110	15	204	20	51	148	249	122
EBC1_LUNG	EBC1	lung	carcinoma	squamous_cell_carcinoma		Lung:NSCLC_Squamous	0.05	48.5829	Resistant	10	44	Resistant				Resistant	1164.36	641.583	1	1	1	0.607299	Predicted sensitive	116	4	157	23	408	340	1697	217	58	15	642	6	231	85	38	559	60	1760	322	10	160	3	26	376	342	41
MHHCALL4_HAEMATOPOIETIC_AND_LYMPHOID_TISSUE	MHHCALL4	haematopoietic_and_lymphoid_tissue	lymphoid_neoplasm	acute_lymphoblastic_B_cell_leukaemia		Leukemia:ALL											731.957	919.65	0	1	0	0.713769	Predicted sensitive	77	23	189	1055	179	477	613	6	112	127	920	11	187	276	175	1611	20	284	75	7	693	310	61	10	198	141
SNU324_PANCREAS	SNU324	pancreas	carcinoma			Pancreas											4176.61	1139.79	1	1	1	0.660486	Predicted sensitive	70	17	233	8	344	301	1060	734	128	108	1140	689	1370	159	110	223	44	804	1356	6	158	3	27	6294	269	64
KU812_HAEMATOPOIETIC_AND_LYMPHOID_TISSUE	KU812	haematopoietic_and_lymphoid_tissue	haematopoietic_neoplasm	chronic_myeloid_leukaemia	Ph_positive	Leukemia:CML	0.000145526	87.2258	Sensitive							Sensitive	394.948	405.323	0	0	0	0.405694	Predicted resistant	88	10	123	70	173	451	1132	25	240	67	406	20	254	129	42	389	21	420	3	10	328	116	32	878	335	105
U251MG_CENTRAL_NERVOUS_SYSTEM	U251MG	central_nervous_system	glioma	astrocytoma		CNS:Glioma	0.05	-17.6085	Resistant							Resistant	1161.78	338.651	1	0	0	0.0933943	Predicted resistant	94	30	112	35	169	256	1747	67	165	11	339	7	409	221	487	3584	24	500	275	15	113	4	22	127	148	53
HCC70_BREAST	HCC70	breast	carcinoma	ductal_carcinoma		Breast:Carcinoma	0.05	3.48671	Resistant	10	8.225	Resistant				Resistant	169.8	572.718	0	1	0	0.0485376	Predicted resistant	101	34	194	16	121	578	1339	106	48	58	573	1656	412	105	59	1069	36	537	273	20	71	232	23	38	411	47
MDAMB361_BREAST	MDAMB361	breast	carcinoma			Breast:Carcinoma											398.131	286.53	0	0	0	0.0552512	Predicted resistant	67	9	315	21	252	386	878	17	116	8	287	51	523	305	57	1793	67	1309	118	7	122	633	43	174	383	90
SKM1_HAEMATOPOIETIC_AND_LYMPHOID_TISSUE	SKM1	haematopoietic_and_lymphoid_tissue	haematopoietic_neoplasm	acute_myeloid_leukaemia	M5	Leukemia:AML	0.000791302	52.7075	Intermediate							Intermediate	815.649	591.805	0	1	0	0.458856	Predicted resistant	163	3	146	962	116	866	776	2	59	29	592	278	444	117	51	168	23	422	196	5	176	861	61	662	182	80
OV90_OVARY	OV90	ovary	carcinoma	mixed_carcinoma		Ovary:Carcinoma	0.05	5.24888	Resistant	10	0	Resistant				Resistant	722.506	492.507	0	0	0	0.166123	Predicted resistant	27	31	73	14	322	265	945	13	120	50	493	454	949	174	38	1003	178	511	4	10	139	12	47	745	245	128
NCIH1623_LUNG	NCIH1623	lung	carcinoma	adenocarcinoma		Lung:NSCLC_Adeno	0.05	1.36173	Resistant							Resistant	404.317	879.194	0	1	0	0.597324	Predicted sensitive	76	12	253	75	162	301	2642	97	61	19	879	84	345	162	34	530	37	551	70	24	76	1121	6	242	218	58
SNU398_LIVER	SNU398	liver	carcinoma	hepatocellular_carcinoma		Liver:HCC											404.806	3.2412	0	0	0	0.00127924	Predicted resistant	116	4	71	19	105	373	1082	22	297	3	4	182	638	206	53	7213	13	421	105	3	131	155	27	23	376	88
OVKATE_OVARY	OVKATE	ovary	carcinoma	adenocarcinoma		Ovary:Carcinoma				10	0	Resistant				Resistant	405.653	885.571	0	1	0	0.207285	Predicted resistant	82	4	118	23	358	646	2587	105	58	55	886	241	950	261	74	297	46	719	142	17	81	223	12	302	347	36
KMRC1_KIDNEY	KMRC1	kidney	carcinoma	clear_cell_renal_cell_carcinoma		Kidney:Carcinoma	0.000207039	87.7215	Sensitive	0.008	93	Sensitive				Sensitive	3308.61	1118.64	1	1	1	0.862164	Predicted sensitive	29	4	493	28	196	1251	4581	1209	69	14	1119	1	2192	183	124	20	16	703	948	10	133	1150	54	11016	301	42
HCC1500_BREAST	HCC1500	breast	carcinoma	ductal_carcinoma		Breast:Carcinoma	0.05	-17.4825	Resistant							Resistant	272.946	160.699	0	0	0	0.0474243	Predicted resistant	96	22	114	2584	176	381	935	12	72	13	161	16	144	371	177	651	43	1340	35	19	691	123	43	325	286	97
ST486_HAEMATOPOIETIC_AND_LYMPHOID_TISSUE	ST486	haematopoietic_and_lymphoid_tissue	lymphoid_neoplasm	Burkitt_lymphoma		Lymphoma:NH_B_cell	0.05	-17.1417	Resistant							Resistant	1.271	522.328	0	1	0	0.086005	Predicted resistant	228	7	280	207	209	509	976	200	52	45	523	437	163	209	100	68	56	436	150	11	125	590	41	23	210	43
NCIH1581_LUNG	NCIH1581	lung	carcinoma	large_cell_carcinoma		Lung:NSCLC_Large_Cell	0.05	8.14423	Resistant							Resistant	408.773	10.9614	0	0	0	0.000286468	Predicted resistant	51	2	68	2	119	174	1505	152	271	13	11	178	629	131	30	1576	39	390	162	25	112	2	58	1	361	111
L428_HAEMATOPOIETIC_AND_LYMPHOID_TISSUE	L428	haematopoietic_and_lymphoid_tissue	lymphoid_neoplasm	Hodgkin_lymphoma		Lymphoma:Hodgkin											410.301	877.477	0	1	0	0.00344844	Predicted resistant	170	34	221	54	297	16	691	938	84	47	878	255	4312	282	322	228	28	283	2328	17	172	186	33	21	332	67
KE39_STOMACH	KE39	stomach	carcinoma			Gastric:Carcinoma											1246.58	668.342	1	1	1	0.441233	Predicted resistant	28	39	310	14	958	433	1805	152	46	22	669	262	542	227	52	9207	19	850	111	6	104	3	16	418	518	108
NCIH1435_LUNG	NCIH1435	lung	carcinoma	non_small_cell_carcinoma		Lung:NSCLC_Others											416.37	483.762	0	0	0	0.07054	Predicted resistant	123	32	122	11	372	321	558	138	131	47	484	94	937	213	40	1127	138	459	46	25	110	4	23	931	613	60
KHM1B_HAEMATOPOIETIC_AND_LYMPHOID_TISSUE	KHM1B	haematopoietic_and_lymphoid_tissue	lymphoid_neoplasm	plasma_cell_myeloma		Lymphoma:Multiple_Myeloma	0.05	-11.8006	Resistant							Resistant	5.5024	1124.64	0	1	0	0.0357586	Predicted resistant	100	7	119	549	70	363	1916	120	62	120	1125	140	414	86	79	42	52	986	50	17	197	4	36	3	318	60
SNU423_LIVER	SNU423	liver	carcinoma	hepatocellular_carcinoma		Liver:HCC							0.0001	10.1242	Resistant	Resistant	425.13	431.641	0	0	0	0.0240673	Predicted resistant	164	9	230	19	242	336	2657	1220	154	26	432	367	823	176	152	2072	94	656	115	10	87	13	62	384	390	57
TT_OESOPHAGUS	TT	oesophagus	carcinoma	squamous_cell_carcinoma		Oesophagus:Carcinoma											426.611	335.44	0	0	0	0.0215973	Predicted resistant	48	32	145	42	120	179	884	4	96	21	336	217	602	79	71	10603	11	4119	56	23	124	105	3	114	378	68
SNU5_STOMACH	SNU5	stomach	carcinoma	undifferentiated_adenocarcinoma		Gastric:Carcinoma											1423.42	1162.28	1	1	1	0.414934	Predicted resistant	180	4	162	17	166	250	2670	2303	71	45	1163	77	2956	171	55	1703	63	635	688	4	55	4	27	136	241	73
MB157_BREAST	MB157	breast	carcinoma			Breast:Carcinoma	0.05	33.4135	Resistant							Resistant	427.263	260.044	0	0	0	0.0167954	Predicted resistant	188	6	115	20	86	307	1657	14	74	13	260	1136	427	137	62	158	89	314	7	13	133	1	107	48	260	50
KMRC20_KIDNEY	KMRC20	kidney	carcinoma	renal_cell_carcinoma		Kidney:Carcinoma	0.05	24.3955	Resistant				0.0001	18.5101	Resistant	Resistant	1763.73	1031.18	1	1	1	0.268689	Predicted resistant	53	21	307	319	231	512	1654	577	83	32	1031	11	2176	163	75	2286	59	478	781	13	140	2170	39	128	227	28
KMS12BM_HAEMATOPOIETIC_AND_LYMPHOID_TISSUE	KMS12BM	haematopoietic_and_lymphoid_tissue	lymphoid_neoplasm	plasma_cell_myeloma		Lymphoma:Multiple_Myeloma	0.05	23.2924	Resistant							Resistant	429.854	866.682	0	1	0	0.108272	Predicted resistant	57	3	276	716	106	162	888	355	72	138	867	784	815	152	46	18	56	733	516	10	128	236	42	2	411	63
KATOIII_STOMACH	KATOIII	stomach	carcinoma	adenocarcinoma		Gastric:Carcinoma	0.05	16.1026	Resistant				0.0001	9.84878	Resistant	Resistant	1087.21	584.382	1	1	1	0.234995	Predicted resistant	190	9	187	29	747	551	1739	199	51	26	585	2	1697	127	38	1293	175	921	326	12	125	7	54	2230	413	67
KMM1_HAEMATOPOIETIC_AND_LYMPHOID_TISSUE	KMM1	haematopoietic_and_lymphoid_tissue	lymphoid_neoplasm	plasma_cell_myeloma		Lymphoma:Multiple_Myeloma	0.05	-9.2605	Resistant							Resistant	874.183	479.334	0	0	0	0.154898	Predicted resistant	126	3	263	107	413	285	887	647	160	108	480	624	1263	200	75	63	39	492	757	15	188	2	52	5	461	85
TALL1_HAEMATOPOIETIC_AND_LYMPHOID_TISSUE	TALL1	haematopoietic_and_lymphoid_tissue	lymphoid_neoplasm	acute_lymphoblastic_T_cell_leukaemia		Leukemia:ALL				0.00016	98	Sensitive				Sensitive	435.074	884.292	0	1	0	0.484716	Predicted resistant	100	2	238	556	285	413	857	427	242	39	885	133	236	251	85	228	42	307	10	7	130	2	75	28	206	95
VMRCLCP_LUNG	VMRCLCP	lung	carcinoma	squamous_cell_carcinoma		Lung:NSCLC_Squamous											435.461	371.638	0	0	0	0.0267847	Predicted resistant	77	34	178	33	193	507	1363	124	141	51	372	11	907	165	90	2680	72	478	177	9	142	472	53	5896	961	68
TE10_OESOPHAGUS	TE10	oesophagus	carcinoma	squamous_cell_carcinoma		Oesophagus:Carcinoma	0.05	-16.2741	Resistant							Resistant	701.528	250.429	0	0	0	0.0395187	Predicted resistant	79	19	68	51	258	253	1154	95	76	2	251	5	470	65	108	2326	81	1700	108	7	118	68	24	4549	734	48
MINO_HAEMATOPOIETIC_AND_LYMPHOID_TISSUE	MINO	haematopoietic_and_lymphoid_tissue	lymphoid_neoplasm	mantle_cell_lymphoma		Lymphoma:NH_B_cell	5.9526e-05	93.9646	Sensitive							Sensitive	444.089	783.646	0	1	0	0.366726	Predicted resistant	138	17	226	487	119	546	738	260	75	53	784	557	506	268	141	2696	80	468	53	1	222	3	123	22	468	78
CL14_LARGE_INTESTINE	CL14	large_intestine	carcinoma			Colorectal:Carcinoma											1154.2	762.464	1	1	1	0.356808	Predicted resistant	68	29	88	10	821	285	1164	195	197	36	763	92	1683	328	93	2354	68	472	57	25	124	9	36	93	396	185
MEC2_HAEMATOPOIETIC_AND_LYMPHOID_TISSUE	MEC2	haematopoietic_and_lymphoid_tissue	lymphoid_neoplasm	chronic_lymphocytic_leukaemia-small_lymphocytic_lymphoma		Leukemia:CLL											447.016	722.642	0	1	0	0.226842	Predicted resistant	193	6	158	834	75	554	430	627	42	68	723	80	1127	144	215	113	42	455	661	14	553	266	63	106	435	103
TE6_OESOPHAGUS	TE6	oesophagus	carcinoma	squamous_cell_carcinoma		Oesophagus:Carcinoma	0.05	28.0992	Resistant							Resistant	448.83	338.959	0	0	0	0.0526934	Predicted resistant	29	6	76	64	110	191	838	13	91	18	339	1	551	249	63	5283	30	3506	441	6	216	93	32	159	392	49
NUDUL1_HAEMATOPOIETIC_AND_LYMPHOID_TISSUE	NUDUL1	haematopoietic_and_lymphoid_tissue	lymphoid_neoplasm	B_cell_lymphoma_unspecified		Lymphoma:NH_B_cell											1189.44	800.255	1	1	1	0.692164	Predicted sensitive	108	4	138	121	132	209	447	599	102	66	800	455	293	218	344	195	55	175	103	3	404	477	189	21	354	79
HS870T_BONE	HS870T	bone	osteosarcoma			Bone:Sarcoma_Osteo											460.166	306.168	0	0	0	0.0121219	Predicted resistant	141	61	142	35	187	341	5323	62	43	19	307	114	689	66	78	13008	29	963	1096	21	78	5	3	182	349	15
KS1_CENTRAL_NERVOUS_SYSTEM	KS1	central_nervous_system	glioma	astrocytoma_Grade_IV	glioblastoma_multiforme	CNS:Glioma_HighGrade	0.05	27.0359	Resistant				0.0001	33.4258	Resistant	Resistant	2940.66	621.923	1	1	1	0.383651	Predicted resistant	104	76	384	102	118	434	3230	296	133	26	622	11	642	239	189	4458	34	538	1718	12	179	3	24	120	336	22
PL21_HAEMATOPOIETIC_AND_LYMPHOID_TISSUE	PL21	haematopoietic_and_lymphoid_tissue	haematopoietic_neoplasm	acute_myeloid_leukaemia	M3	Leukemia:AML	0.05	39.5405	Resistant							Resistant	1191.91	1045.71	1	1	1	0.726109	Predicted sensitive	65	15	102	708	98	717	730	7	86	59	1046	339	745	408	262	1888	17	224	253	2	273	8	58	1283	153	110
EFO27_OVARY	EFO27	ovary	carcinoma	mucinous_carcinoma		Ovary:Carcinoma				10	17	Resistant	0.0001	10.5066	Resistant	Resistant	960.165	438.119	1	0	0	0.29993	Predicted resistant	95	24	74	26	367	328	1654	321	92	29	439	415	404	93	91	1539	199	873	164	11	88	397	24	208	616	56
JHOS2_OVARY	JHOS2	ovary	carcinoma	adenocarcinoma		Ovary:Carcinoma							0.0001	24.7644	Resistant	Resistant	485.299	467.544	0	0	0	0.139709	Predicted resistant	87	87	23	32	339	1136	3851	745	77	23	468	20	500	165	105	7082	81	934	563	15	66	207	33	2245	263	75
HDLM2_HAEMATOPOIETIC_AND_LYMPHOID_TISSUE	HDLM2	haematopoietic_and_lymphoid_tissue	lymphoid_neoplasm	Hodgkin_lymphoma		Lymphoma:Hodgkin											486.695	319.265	0	0	0	0.00821671	Predicted resistant	41	34	114	656	123	140	1993	1718	155	30	320	469	2719	213	507	5	83	477	3491	10	306	62	61	11	143	98
HCC1143_BREAST	HCC1143	breast	carcinoma	ductal_carcinoma		Breast:Carcinoma	0.05	19.4628	Resistant							Resistant	487.762	253.279	0	0	0	0.0380901	Predicted resistant	38	44	409	38	384	458	1684	1413	58	44	254	119	831	125	27	1834	59	1897	82	7	78	410	40	4739	867	92
IGR37_SKIN	IGR37	skin	malignant_melanoma			Skin:Melanoma	0.05	5.55069	Resistant							Resistant	489.044	453.623	0	0	0	0.163867	Predicted resistant	446	2	368	267	111	271	590	7	52	32	454	1	501	156	42	462	2	797	16	7	53	219	24	178	370	82
BXPC3_PANCREAS	BXPC3	pancreas	carcinoma	ductal_carcinoma		Pancreas	0.000121698	93.1051	Sensitive				3.64991e-06	99.7265	Sensitive	Sensitive	1898.93	576	1	1	1	0.322646	Predicted resistant	88	12	204	51	344	563	938	166	68	52	576	25	687	116	34	1278	109	971	395	15	96	567	2	3579	703	73
SNU1105_CENTRAL_NERVOUS_SYSTEM	SNU1105	central_nervous_system	glioma	astrocytoma_Grade_IV	glioblastoma_multiforme	CNS:Glioma_HighGrade											490.418	216.363	0	0	0	0.0491414	Predicted resistant	135	5	128	83	236	410	2535	4	78	23	217	4	452	175	234	785	58	411	355	8	116	45	39	1563	333	67
MOLT16_HAEMATOPOIETIC_AND_LYMPHOID_TISSUE	MOLT16	haematopoietic_and_lymphoid_tissue	lymphoid_neoplasm	acute_lymphoblastic_T_cell_leukaemia		Leukemia:ALL	6.56802e-05	93.7655	Sensitive	0.002	87	Sensitive				Sensitive	308.84	1320.44	0	1	0	0.436659	Predicted resistant	75	5	279	573	72	427	1745	263	76	130	1321	28	161	320	313	1359	29	295	1049	12	265	2	116	12	235	101
NCIH1793_LUNG	NCIH1793	lung	carcinoma	non_small_cell_carcinoma		Lung:NSCLC_Others	0.05	-16.0931	Resistant	10	15	Resistant	0.0001	18.5229	Resistant	Resistant	833.195	543.789	0	1	0	0.0641295	Predicted resistant	56	8	324	10	461	312	1101	202	108	31	544	9	2916	203	106	1826	51	515	344	9	113	798	27	299	556	56
NCIH1915_LUNG	NCIH1915	lung	carcinoma	large_cell_carcinoma		Lung:NSCLC_Large_Cell				10	15	Resistant				Resistant	498.17	773.586	0	1	0	0.00757176	Predicted resistant	90	40	102	8	220	71	2305	12	77	22	774	375	2441	233	59	3777	32	752	351	9	76	1	60	2225	239	44
NCIH322_LUNG	NCIH322	lung	carcinoma	adenocarcinoma		Lung:NSCLC_Adeno											497.968	411.258	0	0	0	0.32353	Predicted resistant	83	28	74	37	342	375	2950	921	14	2	412	23	432	52	40	530	119	1245	17	16	69	2948	19	458	1231	64
EPLC272H_LUNG	EPLC272H	lung	carcinoma	squamous_cell_carcinoma		Lung:NSCLC_Squamous											498.838	547.289	0	1	0	0.106904	Predicted resistant	70	18	51	16	180	562	1386	942	97	49	548	278	995	92	101	1165	43	2894	293	24	93	532	47	15398	753	61
KLE_ENDOMETRIUM	KLE	endometrium	carcinoma	adenocarcinoma		Endometrium:Carcinoma	0.05	25.8679	Resistant							Resistant	501.449	417.618	0	0	0	0.0385915	Predicted resistant	68	4	96	36	1189	346	618	60	143	35	418	1707	424	133	29	646	172	614	352	17	85	15	36	3802	567	43
LN18_CENTRAL_NERVOUS_SYSTEM	LN18	central_nervous_system	glioma	astrocytoma_Grade_IV	glioblastoma_multiforme	CNS:Glioma_HighGrade	0.000304618	88.5827	Sensitive							Sensitive	504.488	651.746	0	1	0	0.316354	Predicted resistant	164	11	236	10	211	448	1446	26	66	21	652	12	158	75	45	5763	43	921	180	15	131	1	10	277	937	114
MONOMAC6_HAEMATOPOIETIC_AND_LYMPHOID_TISSUE	MONOMAC6	haematopoietic_and_lymphoid_tissue	haematopoietic_neoplasm	acute_myeloid_leukaemia	M5	Leukemia:AML	0.05	-16.0076	Resistant							Resistant	551.743	569.95	0	1	0	0.167262	Predicted resistant	125	5	145	580	41	316	675	23	70	104	570	1130	672	190	88	1571	63	423	63	13	268	5	50	1517	323	173
KE97_STOMACH	KE97	stomach	carcinoma			Gastric:Carcinoma											1705.56	461.995	1	0	0	0.260681	Predicted resistant	71	24	208	358	116	411	1339	1777	71	35	462	44	1695	64	156	227	57	318	1850	11	144	337	47	19	248	47
DAUDI_HAEMATOPOIETIC_AND_LYMPHOID_TISSUE	DAUDI	haematopoietic_and_lymphoid_tissue	lymphoid_neoplasm	Burkitt_lymphoma		Lymphoma:NH_B_cell											507.655	249.8	0	0	0	0.0363323	Predicted resistant	68	2	497	1	310	120	1336	2566	177	29	250	192	509	211	212	375	88	509	115	9	220	373	49	3	241	101
MM1S_HAEMATOPOIETIC_AND_LYMPHOID_TISSUE	MM1S	haematopoietic_and_lymphoid_tissue	lymphoid_neoplasm	plasma_cell_myeloma		Lymphoma:Multiple_Myeloma	0.05	-8.12061	Resistant				0.0001	1.125	Resistant	Resistant	181.526	1835.44	0	1	0	0.237321	Predicted resistant	208	6	320	346	564	335	912	542	64	248	1836	17	947	155	327	31	38	462	212	8	185	376	67	8	323	58
EM2_HAEMATOPOIETIC_AND_LYMPHOID_TISSUE	EM2	haematopoietic_and_lymphoid_tissue	haematopoietic_neoplasm	blast_phase_chronic_myeloid_leukaemia		Leukemia:CML	0.000283263	60.1391	Intermediate							Intermediate	511.334	414.394	0	0	0	0.736958	Predicted sensitive	168	16	109	141	100	906	661	7	81	60	415	23	470	225	149	71	54	227	204	9	282	725	52	1348	293	116
AMO1_HAEMATOPOIETIC_AND_LYMPHOID_TISSUE	AMO1	haematopoietic_and_lymphoid_tissue	lymphoid_neoplasm	plasma_cell_myeloma		Lymphoma:Multiple_Myeloma	0.000180951	83.705	Sensitive							Sensitive	1608.17	1834.01	1	1	1	0.705039	Predicted sensitive	71	25	434	1415	87	253	508	858	108	295	1834	114	1260	365	197	316	38	164	458	3	318	5	53	7	382	62
ISTMES2_PLEURA	ISTMES2	pleura	mesothelioma			Lung:Mesothelioma				0.0002125	100	Sensitive				Sensitive	765.759	1088.73	0	1	0	0.600601	Predicted sensitive	192	33	103	14	184	1413	1378	900	90	27	1089	11	1425	135	208	239	57	965	202	17	104	167	28	1444	289	41
NCIH838_LUNG	NCIH838	lung	carcinoma	non_small_cell_carcinoma		Lung:NSCLC_Others	0.000567647	54.7939	Intermediate							Intermediate	514.206	1826.51	0	1	0	0.349293	Predicted resistant	34	43	82	55	121	296	1879	52	62	22	1826	10	1372	120	158	2311	37	856	31	13	111	72	28	1290	659	25
KMS28BM_HAEMATOPOIETIC_AND_LYMPHOID_TISSUE	KMS28BM	haematopoietic_and_lymphoid_tissue	lymphoid_neoplasm	plasma_cell_myeloma		Lymphoma:Multiple_Myeloma	0.000671402	50.6859	Intermediate				0.0001	8.15789	Resistant	Intermediate	496.958	1089.66	0	1	0	0.0797272	Predicted resistant	63	31	275	809	99	226	380	38	65	78	1090	452	1105	144	109	121	37	776	114	11	214	691	43	17	363	43
A172_CENTRAL_NERVOUS_SYSTEM	A172	central_nervous_system	glioma	astrocytoma_Grade_IV	glioblastoma_multiforme	CNS:Glioma_HighGrade	0.00101383	96.384	Sensitive				1.07553e-05	88.7676	Sensitive	Sensitive	1871.68	537.055	1	1	1	0.275413	Predicted resistant	171	9	112	27	405	546	2602	102	125	19	538	11	1791	224	276	1637	57	965	196	11	96	15	63	18	249	76
CAL51_BREAST	CAL51	breast	carcinoma			Breast:Carcinoma	0.05	-15.8844	Resistant	10	29.85	Resistant				Resistant	985.517	500	1	0	0	0.11482	Predicted resistant	36	6	179	124	180	108	1010	80	88	30	500	84	605	182	90	516	57	288	80	20	338	276	27	17	344	61
SNU46_UPPER_AERODIGESTIVE_TRACT	SNU46	upper_aerodigestive_tract	carcinoma	squamous_cell_carcinoma		Upper_Aerodigestive_Tract											515.273	251.542	0	0	0	0.0631977	Predicted resistant	88	13	257	14	461	290	1341	12	117	29	252	575	243	53	68	6752	75	879	150	16	80	601	46	246	796	100
BGC823_STOMACH	BGC823	stomach	carcinoma	adenocarcinoma		Gastric:Carcinoma											1755.46	342.726	1	0	0	0.164999	Predicted resistant	86	10	150	40	189	318	2148	199	76	27	343	844	469	74	51	2864	36	457	194	4	74	5	52	930	414	71
NUDHL1_HAEMATOPOIETIC_AND_LYMPHOID_TISSUE	NUDHL1	haematopoietic_and_lymphoid_tissue	lymphoid_neoplasm	diffuse_large_B_cell_lymphoma		Lymphoma:NH_B_cell											3265.06	784.174	1	1	1	0.919948	Predicted sensitive	75	6	237	1794	89	247	461	18	99	148	784	4	281	151	77	833	47	537	425	19	357	10	80	33	432	260
FADU_UPPER_AERODIGESTIVE_TRACT	FADU	upper_aerodigestive_tract	carcinoma	squamous_cell_carcinoma		Upper_Aerodigestive_Tract	0.05	21.1773	Resistant				0.0001	13.3808	Resistant	Resistant	511.795	172.112	0	0	0	0.017718	Predicted resistant	151	19	189	18	192	309	1117	69	55	28	173	165	214	129	88	3536	45	4224	232	17	125	49	23	426	680	75
A2780_OVARY	A2780	ovary	carcinoma	adenocarcinoma		Ovary:Carcinoma	0.05	47.9024	Resistant	10	38	Resistant	0.0001	38.5689	Resistant	Resistant	1503.82	553.177	1	1	1	0.149429	Predicted resistant	93	4	237	55	96	206	1928	7	97	19	554	41	631	194	35	1204	12	493	204	12	115	4	33	11	259	59
HSC4_UPPER_AERODIGESTIVE_TRACT	HSC4	upper_aerodigestive_tract	carcinoma	squamous_cell_carcinoma		Upper_Aerodigestive_Tract											534.99	334.777	0	0	0	0.0861722	Predicted resistant	41	52	139	21	200	518	1554	158	238	38	335	84	296	161	129	6242	26	1038	463	13	162	293	46	643	356	43
NCIH2170_LUNG	NCIH2170	lung	carcinoma	squamous_cell_carcinoma		Lung:NSCLC_Squamous	0.000134533	96.9071	Sensitive	1.5e-05	86.6667	Sensitive	3.82535e-06	96.3993	Sensitive	Sensitive	871.48	776.512	0	1	0	0.631286	Predicted sensitive	167	54	490	32	320	441	644	56	56	18	777	7	370	288	44	2344	20	452	81	7	187	5	35	3903	366	91
CAL148_BREAST	CAL148	breast	carcinoma	ductal_carcinoma		Breast:Carcinoma											539.478	535.046	0	1	0	0.309481	Predicted resistant	96	8	234	3	331	324	868	4	148	7	535	132	428	291	73	1144	23	442	15	12	363	32	37	9	166	123
SKBR3_BREAST	SKBR3	breast	carcinoma			Breast:Carcinoma	0.05	3.16244	Resistant	10	14	Resistant	0.0001	4.96183	Resistant	Resistant	125.576	474.429	0	0	0	0.0567906	Predicted resistant	157	15	176	17	316	329	858	31	46	9	475	121	418	218	77	1542	62	496	12	1	115	5	23	1	260	123
JHOM2B_OVARY	JHOM2B	ovary	carcinoma	adenocarcinoma		Ovary:Carcinoma											545.316	958.263	0	1	0	0.408486	Predicted resistant	43	43	193	60	284	278	1200	154	120	103	959	989	529	300	78	1564	49	447	178	17	294	2	44	480	312	83
SUPT11_HAEMATOPOIETIC_AND_LYMPHOID_TISSUE	SUPT11	haematopoietic_and_lymphoid_tissue	lymphoid_neoplasm	peripheral_T_cell_lymphoma_unspecified		Lymphoma:NH_T_cell				0.0005	91	Sensitive				Sensitive	312.812	1073.72	0	1	0	0.364928	Predicted resistant	75	5	232	5	75	486	1154	78	85	55	1074	441	251	272	258	58	27	405	10	14	88	3	102	18	232	195
U2OS_BONE	U2OS	bone	osteosarcoma			Bone:Sarcoma_Osteo							0.0001	18.7609	Resistant	Resistant	557.924	263.358	0	0	0	0.0502205	Predicted resistant	168	20	799	26	311	164	978	17	70	15	264	13	399	91	25	2660	42	498	211	16	192	342	20	27	764	52
KYSE450_OESOPHAGUS	KYSE450	oesophagus	carcinoma	squamous_cell_carcinoma		Oesophagus:Carcinoma	0.05	-15.3585	Resistant				0.0001	8.04223	Resistant	Resistant	1804.71	209.178	1	0	0	0.321355	Predicted resistant	109	32	165	140	129	778	1412	30	77	23	210	10	265	117	46	2802	112	1628	314	17	79	448	17	775	260	61
HUH28_BILIARY_TRACT	HUH28	biliary_tract	carcinoma			Biliary_Tract											559.634	411.596	0	0	0	0.0288035	Predicted resistant	45	5	77	12	249	208	2065	53	60	25	412	897	870	102	146	160	14	390	854	7	104	55	31	79	298	60
RERFLCMS_LUNG	RERFLCMS	lung	carcinoma	non_small_cell_carcinoma		Lung:NSCLC_Others	0.05	30.882	Resistant				0.0001	22.4444	Resistant	Resistant	1133.82	774.786	1	1	1	0.0839198	Predicted resistant	81	29	121	11	163	285	1358	332	72	31	775	824	785	190	103	5243	49	372	256	19	77	216	45	5885	301	70
A498_KIDNEY	A498	kidney	carcinoma	renal_cell_carcinoma		Kidney:Carcinoma	0.000210207	95.4959	Sensitive				0.0001	42.0811	Resistant	Intermediate	1706.76	535.275	1	1	1	0.270004	Predicted resistant	50	11	258	32	304	503	944	120	89	27	536	6	1572	138	150	192	18	515	977	3	89	382	22	233	380	64
HCC2935_LUNG	HCC2935	lung	carcinoma	non_small_cell_carcinoma		Lung:NSCLC_Others											569.016	616.696	0	1	0	0.0720773	Predicted resistant	68	6	69	15	562	308	769	330	174	102	617	1	1130	221	95	884	60	527	531	14	139	27	34	470	769	76
CHAGOK1_LUNG	CHAGOK1	lung	carcinoma			Lung:Others	0.05	12.6894	Resistant							Resistant	570.95	1186.95	0	1	0	0.0863766	Predicted resistant	2	7	105	87	93	262	896	64	152	72	1187	349	525	329	107	5685	35	181	265	11	347	5	59	58	296	9
HCC1195_LUNG	HCC1195	lung	carcinoma	mixed_adenosquamous_carcinoma		Lung:NSCLC_Adeno				10	19	Resistant				Resistant	573.648	430.177	0	0	0	0.0166301	Predicted resistant	93	19	144	9	340	190	1061	44	60	69	431	47	1255	122	2	821	63	1087	12	16	443	432	16	10800	1353	155
KYSE180_OESOPHAGUS	KYSE180	oesophagus	carcinoma	squamous_cell_carcinoma		Oesophagus:Carcinoma							0.0001	12.6323	Resistant	Resistant	575.16	345.614	0	0	0	0.28193	Predicted resistant	100	39	224	55	149	317	946	11	87	30	346	17	163	154	22	2043	62	2302	203	10	156	573	20	127	893	52
HCC2157_BREAST	HCC2157	breast	carcinoma	ductal_carcinoma		Breast:Carcinoma											576.967	153.244	0	0	0	0.0632254	Predicted resistant	144	29	71	64	90	685	1210	10	96	15	154	1622	264	93	51	154	59	388	7	14	108	374	107	24	297	51
NCIH1693_LUNG	NCIH1693	lung	carcinoma	adenocarcinoma		Lung:NSCLC_Adeno	0.05	5.65863	Resistant							Resistant	581.517	387.55	0	0	0	0.0655904	Predicted resistant	61	5	93	8	230	259	2862	1745	34	29	388	478	1975	78	11	544	101	923	30	8	77	260	4	1299	1099	33
NALM1_HAEMATOPOIETIC_AND_LYMPHOID_TISSUE	NALM1	haematopoietic_and_lymphoid_tissue	haematopoietic_neoplasm	blast_phase_chronic_myeloid_leukaemia		Leukemia:CML											585.77	764.492	0	1	0	0.57398	Predicted sensitive	50	4	280	1489	150	274	681	2	154	133	765	6	181	292	283	758	18	224	102	9	402	1401	109	7	139	147
DOV13_OVARY	DOV13	ovary	carcinoma			Ovary:Carcinoma											591.166	114.885	0	0	0	0.00909103	Predicted resistant	155	29	349	70	63	185	731	2	173	24	115	673	303	113	116	71	30	491	76	1	138	89	77	11	234	80
NCIH520_LUNG	NCIH520	lung	carcinoma	squamous_cell_carcinoma		Lung:NSCLC_Squamous	0.05	-15.1992	Resistant	10	0	Resistant	0.0001	8.20541	Resistant	Resistant	231.865	202.657	0	0	0	0.0173193	Predicted resistant	65	17	89	13	328	321	833	3	40	15	203	562	443	247	48	258	43	568	13	9	117	137	45	10	284	97
CI1_HAEMATOPOIETIC_AND_LYMPHOID_TISSUE	CI1	haematopoietic_and_lymphoid_tissue	lymphoid_neoplasm	B_cell_lymphoma_unspecified		Lymphoma:NH_B_cell	0.05	27.122	Resistant							Resistant	593.388	348.95	0	0	0	0.133036	Predicted resistant	238	21	260	190	129	603	848	1425	65	3	349	177	1207	159	110	391	49	243	1363	21	271	221	40	38	220	92
SKUT1_SOFT_TISSUE	SKUT1	soft_tissue	leiomyosarcoma			Soft_Tissue:Sarcoma_Leiomyo	0.05	-15.0917	Resistant				0.0001	3.91486	Resistant	Resistant	1041.78	303.731	1	0	0	0.0377271	Predicted resistant	123	3	35	8	180	470	2477	139	68	2	304	1285	900	116	54	947	85	875	2254	19	122	808	42	702	248	57
NCIH716_LARGE_INTESTINE	NCIH716	large_intestine	carcinoma	adenocarcinoma		Colorectal:Carcinoma											132.562	63.185	0	0	0	0.00470059	Predicted resistant	87	24	193	13	114	283	749	13	47	18	64	185	143	143	77	3364	44	413	1	6	237	1429	40	213	237	74
SKCO1_LARGE_INTESTINE	SKCO1	large_intestine	carcinoma	adenocarcinoma		Colorectal:Carcinoma	0.05	-66.3013	Resistant				4.07252e-06	85.3544	Sensitive	Intermediate	1132.6	1034.11	1	1	1	0.896834	Predicted sensitive	15	16	540	1	298	847	1313	208	69	44	1034	26	378	248	35	538	78	438	381	6	179	3	29	6561	191	51
TE15_OESOPHAGUS	TE15	oesophagus	carcinoma	squamous_cell_carcinoma		Oesophagus:Carcinoma	0.000444038	61.9408	Intermediate							Intermediate	603.251	459.083	0	0	0	0.155544	Predicted resistant	133	43	87	17	223	497	860	261	56	28	460	2	299	75	49	3764	129	2128	418	14	124	265	19	3372	820	41
SW1271_LUNG	SW1271	lung	carcinoma	small_cell_carcinoma		Lung:SCLC	0.05	0.340739	Resistant				0.0001	8.80436	Resistant	Resistant	424.163	569.019	0	1	0	0.156041	Predicted resistant	95	5	370	22	841	213	4127	607	114	10	570	10	1507	172	98	1020	51	1185	43	2	101	290	17	430	874	68
SNU1040_LARGE_INTESTINE	SNU1040	large_intestine	carcinoma			Colorectal:Carcinoma											1271.91	545.783	1	1	1	0.632008	Predicted sensitive	58	22	155	22	209	534	639	26	154	22	546	24	362	189	64	1651	73	449	168	12	149	11	67	303	614	84
JMSU1_URINARY_TRACT	JMSU1	urinary_tract	carcinoma			Bladder											607.37	541.767	0	1	0	0.12705	Predicted resistant	107	42	366	122	187	481	2717	968	120	11	542	1772	365	178	278	4180	46	441	34	17	184	1083	49	6024	307	88
CAL27_UPPER_AERODIGESTIVE_TRACT	CAL27	upper_aerodigestive_tract	carcinoma	squamous_cell_carcinoma		Upper_Aerodigestive_Tract							0.0001	5.80467	Resistant	Resistant	609.395	483.372	0	0	0	0.120716	Predicted resistant	64	21	309	35	126	863	1547	819	94	65	484	97	1088	110	167	4803	32	709	539	7	71	2	19	5075	528	54
JJN3_HAEMATOPOIETIC_AND_LYMPHOID_TISSUE	JJN3	haematopoietic_and_lymphoid_tissue	lymphoid_neoplasm	plasma_cell_myeloma		Lymphoma:Multiple_Myeloma	0.05	-14.9681	Resistant							Resistant	100.661	856.311	0	1	0	0.0572131	Predicted resistant	156	3	133	1222	153	249	455	2079	89	100	857	624	925	110	229	61	32	565	1802	14	172	505	34	11	211	81
SKMEL28_SKIN	SKMEL28	skin	malignant_melanoma			Skin:Melanoma											614.928	785.385	0	1	0	0.356839	Predicted resistant	74	4	232	93	112	212	1071	2	63	26	786	380	290	173	47	1999	32	229	41	11	86	178	32	1380	369	43
22RV1_PROSTATE	22RV1	prostate	carcinoma			Prostate	0.05	-14.82	Resistant				0.0001	10.8974	Resistant	Resistant	779.469	54.4744	0	0	0	0.00483361	Predicted resistant	75	26	175	36	89	62	1313	22	152	14	55	262	260	223	91	284	22	220	145	6	141	3	75	10	87	51
COLO680N_OESOPHAGUS	COLO680N	oesophagus	carcinoma	squamous_cell_carcinoma		Oesophagus:Carcinoma	0.05	-14.7615	Resistant							Resistant	718.58	290.785	0	0	0	0.0752087	Predicted resistant	23	4	35	13	494	493	3104	1673	149	42	291	15	791	101	241	2132	45	869	81	4	171	128	17	4097	1050	71
YMB1_BREAST	YMB1	breast	carcinoma			Breast:Carcinoma	0.000219296	75.3488	Sensitive							Sensitive	621.272	283.738	0	0	0	0.308712	Predicted resistant	109	1	67	47	130	973	796	10	90	18	284	81	277	189	48	332	57	1676	170	10	104	210	31	11	197	70
SNU61_LARGE_INTESTINE	SNU61	large_intestine	carcinoma			Colorectal:Carcinoma											513.494	1075.11	0	1	0	0.467021	Predicted resistant	136	24	166	8	219	414	1345	456	80	70	1075	142	979	183	50	2042	111	1080	171	15	123	3	18	333	267	58
JHH5_LIVER	JHH5	liver	carcinoma	hepatocellular_carcinoma		Liver:HCC											627.533	784.113	0	1	0	0.466291	Predicted resistant	92	4	384	2	319	672	925	17	40	29	785	360	658	107	15	1753	33	1312	7	19	75	3	24	57	351	67
DETROIT562_UPPER_AERODIGESTIVE_TRACT	DETROIT562	upper_aerodigestive_tract	carcinoma			Upper_Aerodigestive_Tract	0.05	-14.7059	Resistant	0.0033667	85	Sensitive	0.0001	18.1888	Resistant	Resistant	786.025	551.398	0	1	0	0.633609	Predicted sensitive	88	3	62	24	280	1187	7094	1684	41	44	552	23	587	146	13	1143	144	1705	399	14	179	673	18	3892	1184	44
OVCAR4_OVARY	OVCAR4	ovary	carcinoma			Ovary:Carcinoma	0.05	9.11856	Resistant	10	0	Resistant				Resistant	542.464	468.087	0	0	0	0.0377731	Predicted resistant	87	5	244	26	286	432	2100	178	57	32	469	1317	672	119	97	1489	54	621	440	11	101	93	31	597	494	37
HCC1438_LUNG	HCC1438	lung	carcinoma	large_cell_carcinoma		Lung:NSCLC_Large_Cell											633.833	1094.67	0	1	0	0.0493219	Predicted resistant	27	4	191	135	171	513	1629	851	88	59	1095	952	1478	247	120	4869	58	310	337	3	219	41	28	1857	241	56
SW948_LARGE_INTESTINE	SW948	large_intestine	carcinoma	adenocarcinoma		Colorectal:Carcinoma	0.000205032	95.8677	Sensitive	1e-05	99	Sensitive				Sensitive	1472.94	1191.28	1	1	1	0.93471	Predicted sensitive	95	25	70	8	201	543	1274	93	87	53	1192	158	613	387	64	1444	48	536	92	24	166	1	34	21	179	60
LUDLU1_LUNG	LUDLU1	lung	carcinoma	squamous_cell_carcinoma		Lung:NSCLC_Squamous				10	40	Resistant				Resistant	638.8	518.573	0	1	0	0.106478	Predicted resistant	94	5	165	12	118	214	994	28	67	36	519	8	260	155	55	3275	32	819	470	4	67	697	14	8524	353	41
TE4_OESOPHAGUS	TE4	oesophagus	carcinoma	squamous_cell_carcinoma		Oesophagus:Carcinoma	0.000281262	92.4072	Sensitive							Sensitive	641.175	1051.56	0	1	0	0.662921	Predicted sensitive	71	7	128	16	278	496	449	66	112	35	1052	202	428	178	26	527	32	1389	172	5	80	719	8	3311	466	133
BHY_UPPER_AERODIGESTIVE_TRACT	BHY	upper_aerodigestive_tract	carcinoma	squamous_cell_carcinoma		Upper_Aerodigestive_Tract	0.05	-14.6557	Resistant							Resistant	2382.39	371.24	1	0	0	0.175492	Predicted resistant	53	22	85	21	393	296	1547	386	138	41	372	67	1182	65	110	1166	76	1008	782	16	141	8	22	1898	1535	111
KMS26_HAEMATOPOIETIC_AND_LYMPHOID_TISSUE	KMS26	haematopoietic_and_lymphoid_tissue	lymphoid_neoplasm	plasma_cell_myeloma		Lymphoma:Multiple_Myeloma	0.05	-14.6064	Resistant							Resistant	103.218	2438.42	0	1	0	0.0252674	Predicted resistant	135	35	184	1303	174	147	1564	2291	67	164	2438	649	3017	159	370	68	59	331	958	22	220	195	47	6	694	30
MFE280_ENDOMETRIUM	MFE280	endometrium	carcinoma	adenocarcinoma		Endometrium:Carcinoma											643.643	44.6376	0	0	0	0.0196995	Predicted resistant	19	4	156	12	319	563	847	3	96	43	45	1126	379	103	25	1143	43	403	102	17	117	551	54	36	416	64
FTC133_THYROID	FTC133	thyroid	carcinoma	follicular_carcinoma		Thyroid											643.426	269.909	0	0	0	0.0117396	Predicted resistant	62	19	305	85	205	185	857	23	56	30	270	936	387	115	124	2877	54	235	1228	13	133	4	12	1456	634	62
G292CLONEA141B1_BONE	G292CLONEA141B1	bone	osteosarcoma			Bone:Sarcoma_Osteo											646.013	370.196	0	0	0	0.139338	Predicted resistant	139	23	146	182	495	626	1751	10	68	10	371	653	416	144	158	930	11	1008	101	4	100	26	29	735	230	41
DMS114_LUNG	DMS114	lung	carcinoma	small_cell_carcinoma		Lung:SCLC	0.05	-14.2158	Resistant							Resistant	523.731	32.6193	0	0	0	0.00232379	Predicted resistant	80	16	133	14	71	159	1668	252	142	1	33	116	409	237	36	223	32	3745	44	18	151	470	37	2	229	87
SNU1066_UPPER_AERODIGESTIVE_TRACT	SNU1066	upper_aerodigestive_tract	carcinoma	squamous_cell_carcinoma		Upper_Aerodigestive_Tract											652.193	641.372	0	1	0	0.152124	Predicted resistant	19	15	55	28	232	925	2407	1298	160	141	642	842	997	227	195	8127	59	293	518	18	145	1074	59	4247	356	67
TE8_OESOPHAGUS	TE8	oesophagus	carcinoma	squamous_cell_carcinoma		Oesophagus:Carcinoma											655.111	345.147	0	0	0	0.0621156	Predicted resistant	79	80	145	21	195	159	1188	6	126	16	346	7	167	172	109	4594	35	3655	28	6	277	437	28	25	456	87
SNUC2A_LARGE_INTESTINE	SNUC2A	large_intestine	carcinoma	adenocarcinoma		Colorectal:Carcinoma				10	27	Resistant	0.0001	23.5911	Resistant	Resistant	1213.44	556.066	1	1	1	0.281431	Predicted resistant	99	10	149	51	342	324	1769	562	86	1	556	165	854	115	34	223	160	541	387	10	98	71	29	360	263	72
NCIH596_LUNG	NCIH596	lung	carcinoma	mixed_adenosquamous_carcinoma		Lung:NSCLC_Adeno	0.05	-14.0245	Resistant	0.05766	50	Intermediate	0.0001	4.01265	Resistant	Resistant	1277.01	657.573	1	1	1	0.116311	Predicted resistant	21	66	229	30	393	276	1453	497	42	171	658	1298	728	101	87	9471	46	474	442	14	228	4	23	6547	748	61
HCC33_LUNG	HCC33	lung	carcinoma	small_cell_carcinoma		Lung:SCLC	0.05	-13.9472	Resistant							Resistant	0.5145	10.6748	0	0	0	0.000227224	Predicted resistant	79	18	185	206	160	263	1082	11	103	20	11	549	363	188	178	301	20	333	28	6	373	284	97	15	184	149
NCIH2087_LUNG	NCIH2087	lung	carcinoma	adenocarcinoma		Lung:NSCLC_Adeno	0.000252692	63.472	Intermediate							Intermediate	661.83	1081.15	0	1	0	0.153241	Predicted resistant	43	36	273	18	174	329	915	85	37	22	1081	429	2319	66	28	1503	68	1165	607	22	96	251	2	6071	646	46
NCIH2172_LUNG	NCIH2172	lung	carcinoma	non_small_cell_carcinoma		Lung:NSCLC_Others	0.05	-13.8142	Resistant				0.0001	15.1802	Resistant	Resistant	644.008	409.051	0	0	0	0.0284295	Predicted resistant	4	2	145	428	168	64	2065	115	83	23	409	991	625	379	56	2175	54	257	40	15	652	3	59	638	543	40
MOLP2_HAEMATOPOIETIC_AND_LYMPHOID_TISSUE	MOLP2	haematopoietic_and_lymphoid_tissue	lymphoid_neoplasm	plasma_cell_myeloma		Lymphoma:Multiple_Myeloma											663.351	850.175	0	1	0	0.047602	Predicted resistant	55	3	50	2749	212	217	870	1930	131	371	850	67	2236	184	273	370	40	268	847	10	897	344	27	9	460	64
CAL851_BREAST	CAL851	breast	carcinoma			Breast:Carcinoma	6.55673e-05	72.8392	Sensitive							Sensitive	671.099	402.517	0	0	0	0.043572	Predicted resistant	122	33	318	3	237	374	1313	969	55	29	403	1208	982	127	41	3320	39	475	162	6	30	705	28	5886	408	37
NCIH28_PLEURA	NCIH28	pleura	mesothelioma			Lung:Mesothelioma	0.000159581	83.2145	Sensitive	0.00195	93	Sensitive				Sensitive	1700.45	1220.22	1	1	1	0.76301	Predicted sensitive	89	7	187	73	439	717	2121	553	93	34	1220	9	852	329	58	1729	73	443	271	25	75	2611	60	30	167	70
MEC1_HAEMATOPOIETIC_AND_LYMPHOID_TISSUE	MEC1	haematopoietic_and_lymphoid_tissue	lymphoid_neoplasm	chronic_lymphocytic_leukaemia-small_lymphocytic_lymphoma		Leukemia:CLL	0.000372877	58.4363	Intermediate							Intermediate	675.733	943.981	0	1	0	0.337502	Predicted resistant	45	5	128	1504	42	427	612	702	68	71	944	87	1067	173	254	272	47	404	976	11	569	84	65	63	438	52
SW1783_CENTRAL_NERVOUS_SYSTEM	SW1783	central_nervous_system	glioma	astrocytoma_Grade_III	anaplastic	CNS:Glioma_HighGrade	0.000130595	59.3758	Intermediate							Intermediate	677.678	193.245	0	0	0	0.0413921	Predicted resistant	150	2	148	34	165	392	2172	56	90	10	194	1153	184	56	90	2652	42	642	575	4	102	15	44	403	207	44
LC1F_LUNG	LC1F	lung	carcinoma	squamous_cell_carcinoma		Lung:NSCLC_Squamous											678.844	557.698	0	1	0	0.0906857	Predicted resistant	60	5	171	231	147	149	514	10	87	25	558	4	293	146	82	1693	8	466	76	23	273	364	40	24	512	60
CAL78_BONE	CAL78	bone	chondrosarcoma	dedifferentiated		Bone:Sarcoma_Chondro	0.05	4.77162	Resistant							Resistant	683.659	421.814	0	0	0	0.0839347	Predicted resistant	64	12	117	37	144	254	1750	63	142	7	422	307	359	139	185	2337	22	300	452	2	113	5	41	402	375	67
NCIH1651_LUNG	NCIH1651	lung	carcinoma	adenocarcinoma		Lung:NSCLC_Adeno	0.05	2.84108	Resistant				0.0001	12.8453	Resistant	Resistant	716.812	301.07	0	0	0	0.14137	Predicted resistant	24	26	110	19	216	600	2687	806	40	42	301	15	974	83	31	997	97	1441	136	1	70	153	41	150	371	52
LS123_LARGE_INTESTINE	LS123	large_intestine	carcinoma	adenocarcinoma		Colorectal:Carcinoma											607.434	484.073	0	0	0	0.0661094	Predicted resistant	37	57	223	10	667	307	2796	1481	95	24	484	97	973	105	124	1832	110	1241	183	19	111	3	41	114	512	94
CMLT1_HAEMATOPOIETIC_AND_LYMPHOID_TISSUE	CMLT1	haematopoietic_and_lymphoid_tissue	haematopoietic_neoplasm	blast_phase_chronic_myeloid_leukaemia		Leukemia:CML	0.000106301	62.0552	Intermediate							Intermediate	693.916	937.417	0	1	0	0.212126	Predicted resistant	49	12	95	2682	545	448	588	29	162	110	938	7	670	282	428	1637	18	536	976	9	927	35	111	18	162	142
OCIM1_HAEMATOPOIETIC_AND_LYMPHOID_TISSUE	OCIM1	haematopoietic_and_lymphoid_tissue	haematopoietic_neoplasm	acute_myeloid_leukaemia	M6	Leukemia:AML											697.05	859.633	0	1	0	0.157055	Predicted resistant	49	4	137	252	264	194	520	21	499	92	860	861	950	256	58	140	46	805	71	10	269	4	57	356	373	136
KYSE510_OESOPHAGUS	KYSE510	oesophagus	carcinoma	squamous_cell_carcinoma		Oesophagus:Carcinoma	0.05	16.6139	Resistant							Resistant	698.547	663.177	0	1	0	0.194774	Predicted resistant	75	98	474	15	172	383	1853	149	71	32	664	11	543	207	20	5157	27	2767	331	21	175	14	46	465	333	54
BT549_BREAST	BT549	breast	carcinoma	ductal_carcinoma	papillary	Breast:Carcinoma	0.05	-13.6676	Resistant	10	2.5	Resistant				Resistant	559.727	308.069	0	0	0	0.0315823	Predicted resistant	120	11	313	47	187	473	1233	52	77	27	309	2026	505	141	79	2323	28	383	362	13	69	153	64	3900	320	58
SNU387_LIVER	SNU387	liver	carcinoma	hepatocellular_carcinoma		Liver:HCC							0.0001	-0.763359	Resistant	Resistant	701.823	641.5	0	1	0	0.124559	Predicted resistant	116	7	39	28	241	337	1438	90	135	16	642	12	837	283	141	1243	32	1866	40	19	90	41	66	263	306	47
OVSAHO_OVARY	OVSAHO	ovary	carcinoma	adenocarcinoma		Ovary:Carcinoma	0.05	-13.5524	Resistant	10	0	Resistant	0.0001	2.17645	Resistant	Resistant	606.181	263.614	0	0	0	0.118629	Predicted resistant	70	11	121	25	201	125	1068	18	160	15	264	250	230	146	66	149	48	359	278	3	72	222	30	165	689	43
CAL54_KIDNEY	CAL54	kidney	carcinoma	renal_cell_carcinoma		Kidney:Carcinoma	0.05	49.9499	Resistant				4.41821e-05	60.1881	Intermediate	Intermediate	4427.2	988.537	1	1	1	0.626576	Predicted sensitive	52	26	266	297	602	366	1286	1274	130	72	989	8	2674	334	271	1412	26	388	622	7	181	1396	27	928	191	69
697_HAEMATOPOIETIC_AND_LYMPHOID_TISSUE	697	haematopoietic_and_lymphoid_tissue	lymphoid_neoplasm	acute_lymphoblastic_leukaemia		Leukemia:ALL	0.05	-13.4875	Resistant							Resistant	15.6977	510.523	0	1	0	0.0813557	Predicted resistant	84	6	163	1006	123	437	639	2	116	39	511	8	217	252	36	76	28	239	43	16	2349	639	63	12	323	106
NCIH522_LUNG	NCIH522	lung	carcinoma	non_small_cell_carcinoma		Lung:NSCLC_Others							0.0001	11.5622	Resistant	Resistant	705.386	274.315	0	0	0	0.0148727	Predicted resistant	70	4	95	9	129	315	1330	20	236	12	275	683	638	228	56	1840	47	530	114	9	180	44	104	11	224	114
KASUMI1_HAEMATOPOIETIC_AND_LYMPHOID_TISSUE	KASUMI1	haematopoietic_and_lymphoid_tissue	haematopoietic_neoplasm	acute_myeloid_leukaemia	M2	Leukemia:AML							0.0001	9.59088	Resistant	Resistant	707.545	661.263	0	1	0	0.496862	Predicted resistant	56	5	171	394	81	381	794	3	136	70	662	24	240	148	96	261	17	225	23	14	397	407	125	410	196	39
SW403_LARGE_INTESTINE	SW403	large_intestine	carcinoma	adenocarcinoma		Colorectal:Carcinoma											760.746	866.174	0	1	0	0.609851	Predicted sensitive	77	4	111	9	203	779	863	90	75	34	867	12	795	164	101	1185	58	625	82	15	98	200	33	38	219	90
A3KAW_HAEMATOPOIETIC_AND_LYMPHOID_TISSUE	A3KAW	haematopoietic_and_lymphoid_tissue	lymphoid_neoplasm	diffuse_large_B_cell_lymphoma		Lymphoma:NH_B_cell							0.0001	9.7374	Resistant	Resistant	713.77	685.996	0	1	0	0.0464702	Predicted resistant	81	18	325	3	101	176	1087	53	52	83	686	10	1774	76	45	5392	51	411	573	16	287	5	63	2	494	38
BICR31_UPPER_AERODIGESTIVE_TRACT	BICR31	upper_aerodigestive_tract	carcinoma	squamous_cell_carcinoma		Upper_Aerodigestive_Tract											714.186	707.725	0	1	0	0.10415	Predicted resistant	5	19	83	38	181	560	1941	1015	67	59	708	3	1320	156	85	5542	59	1007	395	10	132	253	55	4577	578	28
SW1116_LARGE_INTESTINE	SW1116	large_intestine	carcinoma	adenocarcinoma		Colorectal:Carcinoma											879.965	735.917	0	1	0	0.526479	Predicted sensitive	73	10	147	15	363	534	1470	941	80	35	736	133	1163	119	17	2132	240	516	158	12	114	7	28	565	394	194
COV362_OVARY	COV362	ovary	carcinoma			Ovary:Carcinoma											716.742	687.677	0	1	0	0.0211146	Predicted resistant	26	21	60	47	152	163	1040	100	81	58	688	1206	714	137	81	2882	75	497	792	22	189	666	65	738	527	22
MDAMB435S_SKIN	MDAMB435S	skin	malignant_melanoma			Skin:Melanoma											717.583	638.833	0	1	0	0.0784057	Predicted resistant	15	3	80	31	151	344	1623	156	84	24	639	758	1317	148	162	158	16	548	117	11	111	4	37	351	386	55
RS411_HAEMATOPOIETIC_AND_LYMPHOID_TISSUE	RS411	haematopoietic_and_lymphoid_tissue	lymphoid_neoplasm	acute_lymphoblastic_B_cell_leukaemia		Leukemia:ALL	0.05	-13.4591	Resistant							Resistant	84.764	391.205	0	0	0	0.200384	Predicted resistant	110	20	332	1269	111	988	745	2	75	32	392	13	156	190	74	139	50	538	112	6	157	507	77	14	188	132
GI1_CENTRAL_NERVOUS_SYSTEM	GI1	central_nervous_system	glioma	gliosarcoma		CNS:Glioma	0.000144752	90.0465	Sensitive							Sensitive	719.458	453.413	0	0	0	0.114675	Predicted resistant	91	20	158	71	72	403	904	8	50	16	454	1330	275	107	66	1053	46	351	171	26	97	10	54	373	331	63
HCT15_LARGE_INTESTINE	HCT15	large_intestine	carcinoma	adenocarcinoma		Colorectal:Carcinoma	0.05	37.1511	Resistant				0.0001	30.2337	Resistant	Resistant	1036.43	603.011	1	1	1	0.220267	Predicted resistant	90	9	256	39	236	510	910	61	39	42	604	19	868	148	51	3233	104	704	631	10	108	5	14	20	376	60
SNU1033_LARGE_INTESTINE	SNU1033	large_intestine	carcinoma			Colorectal:Carcinoma											1212.33	868.823	1	1	1	0.286381	Predicted resistant	65	3	183	9	509	463	1135	343	65	38	869	1407	1484	190	49	579	57	603	394	71	138	4	19	384	540	81
SUDHL5_HAEMATOPOIETIC_AND_LYMPHOID_TISSUE	SUDHL5	haematopoietic_and_lymphoid_tissue	lymphoid_neoplasm	diffuse_large_B_cell_lymphoma		Lymphoma:NH_B_cell	0.000135538	92.5934	Sensitive							Sensitive	721.63	408.904	0	0	0	0.0306537	Predicted resistant	109	5	144	15	42	166	1912	1766	83	12	409	248	1169	509	219	3489	51	312	383	18	383	570	105	4	226	104
SNU407_LARGE_INTESTINE	SNU407	large_intestine	carcinoma			Colorectal:Carcinoma											1313.31	385.536	1	0	0	0.574298	Predicted sensitive	56	16	96	32	218	672	1232	241	112	6	386	37	267	163	55	1089	65	348	183	27	121	765	25	2196	205	97
SNU878_LIVER	SNU878	liver	carcinoma	hepatocellular_carcinoma		Liver:HCC	0.05	6.37475	Resistant							Resistant	726.696	778.138	0	1	0	0.164837	Predicted resistant	85	18	215	80	247	585	562	243	47	80	778	427	658	251	61	693	23	277	398	22	73	142	40	330	218	60
KMS21BM_HAEMATOPOIETIC_AND_LYMPHOID_TISSUE	KMS21BM	haematopoietic_and_lymphoid_tissue	lymphoid_neoplasm	plasma_cell_myeloma		Lymphoma:Multiple_Myeloma											730.194	979.395	0	1	0	0.146569	Predicted resistant	72	4	278	638	88	306	783	3643	45	157	980	124	1412	107	106	454	46	543	317	14	709	901	21	15	477	38
PECAPJ34CLONEC12_UPPER_AERODIGESTIVE_TRACT	PECAPJ34CLONEC12	upper_aerodigestive_tract	carcinoma	squamous_cell_carcinoma		Upper_Aerodigestive_Tract											729.741	382.965	0	0	0	0.0554808	Predicted resistant	39	3	127	12	185	387	550	84	116	72	383	1	738	131	64	4823	117	1917	197	16	152	610	38	5626	609	32
CAOV4_OVARY	CAOV4	ovary	carcinoma	adenocarcinoma		Ovary:Carcinoma											731.061	960.426	0	1	0	0.686494	Predicted sensitive	33	8	99	35	271	391	1290	41	105	96	961	394	324	158	83	1049	37	171	130	9	82	109	39	201	419	49
HEC251_ENDOMETRIUM	HEC251	endometrium	carcinoma	adenocarcinoma		Endometrium:Carcinoma	0.05	-13.2804	Resistant							Resistant	1581.49	949.433	1	1	1	0.867891	Predicted sensitive	43	11	222	23	206	549	1374	136	111	41	950	745	151	153	129	1630	453	350	218	11	192	1427	50	1413	532	49
SNU1197_LARGE_INTESTINE	SNU1197	large_intestine	carcinoma			Colorectal:Carcinoma											1402.09	902.393	1	1	1	0.573376	Predicted sensitive	89	12	205	6	833	685	2449	3171	64	45	903	390	1410	110	166	453	301	693	576	15	204	2	17	1481	640	94
LOVO_LARGE_INTESTINE	LOVO	large_intestine	carcinoma	adenocarcinoma		Colorectal:Carcinoma	0.000396584	63.9891	Intermediate	0.123	53	Intermediate				Intermediate	1320.68	855.989	1	1	1	0.392295	Predicted resistant	77	34	97	163	259	298	1216	45	68	42	856	55	703	180	63	1516	106	704	787	5	160	4	54	86	151	48
CAOV3_OVARY	CAOV3	ovary	carcinoma	adenocarcinoma		Ovary:Carcinoma	9.72711e-05	94.0959	Sensitive							Sensitive	733.865	277.85	0	0	0	0.11828	Predicted resistant	99	14	117	12	344	1488	1583	165	115	31	278	589	476	104	26	2532	148	790	502	8	57	187	65	1530	287	85
CW2_LARGE_INTESTINE	CW2	large_intestine	carcinoma			Colorectal:Carcinoma											1546.26	809.357	1	1	1	0.749078	Predicted sensitive	135	18	328	98	257	371	929	39	47	83	810	26	245	40	29	5688	40	684	439	10	135	3	25	695	162	72
HCT116_LARGE_INTESTINE	HCT116	large_intestine	carcinoma			Colorectal:Carcinoma	0.00021401	56.4197	Intermediate	0.67	45	Resistant	0.0001	40.5771	Resistant	Resistant	1027.5	467.893	1	0	0	0.317737	Predicted resistant	203	14	265	26	427	473	957	55	108	10	468	120	526	227	29	1431	178	582	250	10	162	298	33	29	285	62
MELJUSO_SKIN	MELJUSO	skin	malignant_melanoma			Skin:Melanoma	0.000228451	64.558	Intermediate							Intermediate	741.905	296.46	0	0	0	0.206331	Predicted resistant	118	15	673	112	202	316	2769	47	63	6	297	6	324	134	62	2767	31	939	115	8	60	586	24	3273	305	114
HT_HAEMATOPOIETIC_AND_LYMPHOID_TISSUE	HT	haematopoietic_and_lymphoid_tissue	lymphoid_neoplasm	B_cell_lymphoma_unspecified		Lymphoma:NH_B_cell	0.05	-13.1128	Resistant							Resistant	441.4	526.939	0	1	0	0.0968134	Predicted resistant	70	5	395	10	75	245	2704	5508	71	3	527	168	944	202	73	277	114	385	49	7	226	4	66	11	273	74
OCILY3_HAEMATOPOIETIC_AND_LYMPHOID_TISSUE	OCILY3	haematopoietic_and_lymphoid_tissue	lymphoid_neoplasm	diffuse_large_B_cell_lymphoma		Lymphoma:NH_B_cell	0.05	23.7133	Resistant							Resistant	746.703	629.633	0	1	0	0.0569092	Predicted resistant	146	41	286	1290	154	1233	558	1107	32	17	630	5	8361	76	82	35	29	791	323	1	528	1086	34	22	274	42
CL11_LARGE_INTESTINE	CL11	large_intestine	carcinoma	adenocarcinoma		Colorectal:Carcinoma											1577.55	943.29	1	1	1	0.633405	Predicted sensitive	102	30	170	14	521	896	902	66	123	47	944	368	1087	224	58	2358	25	489	396	84	183	156	27	28	589	119
KPL1_BREAST	KPL1	breast	carcinoma			Breast:Carcinoma	0.05	19.8834	Resistant	10	8.2	Resistant				Resistant						0.0394809	Predicted resistant	119	9	221	56	109	413	605	2	99	7	216	3	525	176	31	1885	16	790	107	2	168	432	26	22	472	116
SNU626_CENTRAL_NERVOUS_SYSTEM	SNU626	central_nervous_system	glioma	astrocytoma_Grade_IV	glioblastoma_multiforme	CNS:Glioma_HighGrade	0.05	15.1892	Resistant							Resistant	751.967	794.422	0	1	0	0.11424	Predicted resistant	66	5	134	113	295	170	1054	63	77	47	795	996	421	132	227	243	49	370	563	10	120	7	63	33	250	67
1321N1_CENTRAL_NERVOUS_SYSTEM	1321N1	central_nervous_system	glioma	astrocytoma		CNS:Glioma	0.000186946	60.8332	Intermediate							Intermediate	753.466	702.259	0	1	0	0.146693	Predicted resistant	131	21	170	41	163	187	1413	79	59	14	703	11	761	128	29	4267	34	523	349	14	128	5	25	959	508	65
MOLM6_HAEMATOPOIETIC_AND_LYMPHOID_TISSUE	MOLM6	haematopoietic_and_lymphoid_tissue	haematopoietic_neoplasm	blast_phase_chronic_myeloid_leukaemia		Leukemia:CML	0.000349759	89.1639	Sensitive							Sensitive	755.127	824.941	0	1	0	0.81022	Predicted sensitive	95	29	89	619	79	1144	1021	2	195	62	825	59	371	222	242	971	17	364	333	9	197	667	71	630	100	137
LS513_LARGE_INTESTINE	LS513	large_intestine	carcinoma	adenocarcinoma		Colorectal:Carcinoma											1693.95	530.387	1	1	1	0.749325	Predicted sensitive	43	21	276	12	246	507	1060	165	92	59	531	4	187	199	43	2143	39	218	578	85	227	6	79	264	161	58
CHL1_SKIN	CHL1	skin	malignant_melanoma			Skin:Melanoma	0.05	-13.02	Resistant				0.0001	18.9389	Resistant	Resistant	851.437	47.6916	0	0	0	0.0178732	Predicted resistant	111	11	151	177	101	319	417	1	59	4	48	60	146	187	42	3783	42	886	9	3	220	1	25	22	452	54
SNUC4_LARGE_INTESTINE	SNUC4	large_intestine	carcinoma	adenocarcinoma		Colorectal:Carcinoma											1568	497.654	1	0	0	0.654513	Predicted sensitive	97	10	182	107	134	644	1153	55	94	27	498	14	536	169	45	554	45	429	632	11	202	3	45	141	143	95
RT11284_URINARY_TRACT	RT11284	urinary_tract	carcinoma			Bladder											758.489	451.795	0	0	0	0.437497	Predicted resistant	13	3	173	33	138	488	1487	1	114	29	452	8	367	161	85	234	71	330	206	11	107	305	38	106	511	87
SNU175_LARGE_INTESTINE	SNU175	large_intestine	carcinoma			Colorectal:Carcinoma											1742.91	634.953	1	1	1	0.900599	Predicted sensitive	60	27	166	279	154	772	1080	13	137	36	635	25	297	257	131	1124	81	235	171	19	125	5	78	36	297	96
HS255T_LARGE_INTESTINE	HS255T	large_intestine	carcinoma	adenocarcinoma		Colorectal:Carcinoma											1639.21	206.689	1	0	0	0.0368565	Predicted resistant	52	4	212	29	158	251	1293	14	150	25	207	251	554	157	225	2263	14	227	1787	14	582	6	28	47	244	38
SW480_LARGE_INTESTINE	SW480	large_intestine	carcinoma	adenocarcinoma		Colorectal:Carcinoma	0.05	16.2847	Resistant	10	30	Resistant				Resistant	758.424	282.74	0	0	0	0.111355	Predicted resistant	58	20	220	3	661	560	1567	318	53	23	283	154	588	116	53	1516	92	1305	945	60	79	7	31	50	518	61
HCC366_LUNG	HCC366	lung	carcinoma	mixed_adenosquamous_carcinoma		Lung:NSCLC_Adeno	0.05	26.9434	Resistant	10	15	Resistant				Resistant	674.78	1094.4	0	1	0	0.0934788	Predicted resistant	23	4	173	53	180	376	4147	3211	186	52	1095	411	1434	101	91	638	37	636	357	15	194	13	35	4689	467	25
DAOY_CENTRAL_NERVOUS_SYSTEM	DAOY	central_nervous_system	primitive_neuroectodermal_tumour-medulloblastoma			CNS:Medulloblastoma	0.05	-12.8355	Resistant				0.0001	3.79256	Resistant	Resistant	379.933	440.81	0	0	0	0.119959	Predicted resistant	74	6	121	46	86	360	1124	100	78	44	441	3	243	79	62	1279	82	359	160	30	99	607	19	760	504	49
SCC9_UPPER_AERODIGESTIVE_TRACT	SCC9	upper_aerodigestive_tract	carcinoma	squamous_cell_carcinoma		Upper_Aerodigestive_Tract				10	0	Resistant				Resistant	767.621	330.409	0	0	0	0.0253522	Predicted resistant	109	21	53	14	245	50	2591	1294	107	26	331	5	629	133	114	1605	62	313	331	24	187	18	37	1427	446	99
KELLY_AUTONOMIC_GANGLIA	KELLY	autonomic_ganglia	neuroblastoma			CNS:Neuroblastoma	0.05	-12.7218	Resistant							Resistant	859.32	15.3521	0	0	0	0.00914809	Predicted resistant	112	36	229	415	68	766	1402	10	117	10	16	228	206	181	115	6024	22	213	25	7	237	391	91	9	200	91
SUDHL8_HAEMATOPOIETIC_AND_LYMPHOID_TISSUE	SUDHL8	haematopoietic_and_lymphoid_tissue	lymphoid_neoplasm	diffuse_large_B_cell_lymphoma		Lymphoma:NH_B_cell	5.705e-05	92.0292	Sensitive							Sensitive	776.34	517.816	0	1	0	0.277975	Predicted resistant	108	10	127	84	657	131	431	102	73	31	518	370	349	277	232	280	99	317	151	23	241	6	81	20	340	94
CL40_LARGE_INTESTINE	CL40	large_intestine	carcinoma			Colorectal:Carcinoma											2142.34	837.712	1	1	1	0.757036	Predicted sensitive	108	16	332	20	836	555	711	244	85	66	838	80	1040	221	78	1782	77	350	590	28	128	2	28	875	179	125
COLO678_LARGE_INTESTINE	COLO678	large_intestine	carcinoma	adenocarcinoma		Colorectal:Carcinoma											2143.66	371.019	1	0	0	0.488179	Predicted resistant	69	4	233	15	697	639	1760	29	204	46	371	1	457	360	129	1663	19	1013	1773	11	333	1	66	79	189	89
SW837_LARGE_INTESTINE	SW837	large_intestine	carcinoma	adenocarcinoma		Colorectal:Carcinoma	0.05	7.1599	Resistant							Resistant	782.186	1035.92	0	1	0	0.164627	Predicted resistant	44	20	189	19	305	187	2171	447	88	44	1036	281	1222	254	23	527	96	356	188	16	135	6	40	93	522	59
G401_SOFT_TISSUE	G401	soft_tissue	rhabdoid_tumour			Soft_Tissue:Sarcoma_Rhabdoid	0.05	39.1209	Resistant				0.0001	27.0757	Resistant	Resistant	1023.42	367.121	1	0	0	0.121323	Predicted resistant	57	16	837	201	135	222	1367	3	235	9	368	37	446	172	28	2121	41	482	27	15	140	5	44	15	301	88
MKN74_STOMACH	MKN74	stomach	carcinoma	tubular_adenocarcinoma		Gastric:Carcinoma											1786.03	612.871	1	1	1	0.278575	Predicted resistant	100	32	279	36	885	685	2971	480	123	18	613	49	3745	139	68	3132	151	576	82	24	157	4	19	1006	2316	48
EB1_HAEMATOPOIETIC_AND_LYMPHOID_TISSUE	EB1	haematopoietic_and_lymphoid_tissue	lymphoid_neoplasm	Burkitt_lymphoma		Lymphoma:NH_B_cell	0.05	-12.4956	Resistant							Resistant	2257.32	309.889	1	0	0	0.150924	Predicted resistant	52	5	1075	776	196	499	2306	3336	122	23	310	356	1781	162	317	3133	53	521	1802	6	393	9	29	11	427	64
NCIH747_LARGE_INTESTINE	NCIH747	large_intestine	carcinoma	adenocarcinoma		Colorectal:Carcinoma							0.0001	9.02854	Resistant	Resistant	1125.36	774.345	1	1	1	0.0738846	Predicted resistant	165	30	208	12	587	446	2140	1642	48	37	775	441	2742	156	60	1602	181	1007	696	7	181	11	24	41	632	75
MUTZ5_HAEMATOPOIETIC_AND_LYMPHOID_TISSUE	MUTZ5	haematopoietic_and_lymphoid_tissue	lymphoid_neoplasm	acute_lymphoblastic_B_cell_leukaemia		Leukemia:ALL											781.913	652.806	0	1	0	0.514879	Predicted sensitive	79	5	207	1036	390	577	681	6	149	108	653	9	199	360	313	6341	25	429	76	8	590	478	51	1	148	139
GA10_HAEMATOPOIETIC_AND_LYMPHOID_TISSUE	GA10	haematopoietic_and_lymphoid_tissue	lymphoid_neoplasm	Burkitt_lymphoma		Lymphoma:NH_B_cell	0.000432818	63.4493	Intermediate				1.27253e-05	51.2216	Intermediate	Intermediate	184.655	378.15	0	0	0	0.107831	Predicted resistant	81	29	323	8	98	275	672	309	63	4	379	429	130	271	73	35	63	353	39	3	338	282	60	14	284	60
PECAPJ15_UPPER_AERODIGESTIVE_TRACT	PECAPJ15	upper_aerodigestive_tract	carcinoma	squamous_cell_carcinoma		Upper_Aerodigestive_Tract											782.986	615.041	0	1	0	0.255643	Predicted resistant	17	11	166	2	197	346	1411	266	60	36	615	8	468	113	127	6954	35	1389	334	17	150	657	66	465	397	42
CAKI2_KIDNEY	CAKI2	kidney	carcinoma	clear_cell_renal_cell_carcinoma		Kidney:Carcinoma	0.05	41.247	Resistant	10	29	Resistant				Resistant	1154.02	833.402	1	1	1	0.206187	Predicted resistant	87	8	973	72	849	435	796	810	74	44	922	15	4336	256	33	20	19	545	1733	17	103	2182	31	243	657	39
A375_SKIN	A375	skin	malignant_melanoma			Skin:Melanoma	0.05	33.1732	Resistant				0.0001	45.459	Resistant	Resistant	871.523	374.541	0	0	0	0.243694	Predicted resistant	236	2	664	43	157	204	1488	14	64	22	375	16	181	112	50	871	1	815	219	15	106	347	49	637	477	139
HCC2218_BREAST	HCC2218	breast	carcinoma	ductal_carcinoma		Breast:Carcinoma	0.05	43.488	Resistant	10	31	Resistant				Resistant	490.196	446.645	0	0	0	0.219262	Predicted resistant	93	11	234	2	215	402	980	23	109	32	447	46	179	116	55	5101	64	360	45	12	132	541	49	193	326	37
NCIH226_LUNG	NCIH226	lung	carcinoma	squamous_cell_carcinoma		Lung:NSCLC_Squamous	0.000473117	72.8347	Sensitive	2.03	60	Intermediate				Sensitive	1810.42	359.116	1	0	0	0.18162	Predicted resistant	81	27	370	20	225	607	1406	193	84	7	359	16	2100	120	173	50	168	1027	1948	9	132	17	42	1915	332	36
NALM6_HAEMATOPOIETIC_AND_LYMPHOID_TISSUE	NALM6	haematopoietic_and_lymphoid_tissue	lymphoid_neoplasm	acute_lymphoblastic_B_cell_leukaemia		Leukemia:ALL	5.4313e-05	92.1535	Sensitive							Sensitive	792.911	582.822	0	1	0	0.708153	Predicted sensitive	48	3	148	622	178	292	852	7	158	44	583	12	209	218	183	27	16	254	103	8	392	840	101	6	175	94
NCIH2228_LUNG	NCIH2228	lung	carcinoma	adenocarcinoma		Lung:NSCLC_Adeno											792.838	1100.15	0	1	0	0.145837	Predicted resistant	98	44	103	43	482	367	1818	462	53	22	1101	12	1511	200	132	4361	60	1408	760	3	69	1009	15	424	331	32
U937_HAEMATOPOIETIC_AND_LYMPHOID_TISSUE	U937	haematopoietic_and_lymphoid_tissue	lymphoid_neoplasm	diffuse_large_B_cell_lymphoma		Lymphoma:NH_B_cell	0.000104075	53.7979	Intermediate							Intermediate	794.461	434.838	0	0	0	0.679707	Predicted sensitive	97	7	156	377	78	567	471	11	112	32	435	180	246	72	55	44	27	424	170	16	99	1034	47	51	160	76
LS1034_LARGE_INTESTINE	LS1034	large_intestine	carcinoma	adenocarcinoma		Colorectal:Carcinoma							0.0001	34.5434	Resistant	Resistant	2596.45	913.54	1	1	1	0.724412	Predicted sensitive	103	16	239	8	185	360	1384	295	98	20	914	14	931	195	48	2499	69	620	109	35	144	3	29	42	381	128
EFM19_BREAST	EFM19	breast	carcinoma	ductal_carcinoma		Breast:Carcinoma	0.05	-12.257	Resistant				0.0001	12.8977	Resistant	Resistant	363.465	437.115	0	0	0	0.156357	Predicted resistant	33	3	292	18	154	648	691	7	63	24	438	2	229	295	62	1398	75	430	4	26	144	3	42	7	316	61
NCIH1666_LUNG	NCIH1666	lung	carcinoma	bronchioloalveolar_adenocarcinoma		Lung:NSCLC_Adeno	0.000151384	80.9987	Sensitive				9.85966e-07	94.4367	Sensitive	Sensitive	1698.43	1709.78	1	1	1	0.703832	Predicted sensitive	101	2	229	22	226	205	1019	34	97	15	1710	2	405	105	79	1671	66	791	865	10	131	416	33	5171	475	62
DLD1_LARGE_INTESTINE	DLD1	large_intestine	carcinoma	adenocarcinoma		Colorectal:Carcinoma	0.05	37.4696	Resistant							Resistant	1263.29	767.449	1	1	1	0.301232	Predicted resistant	60	6	267	15	416	279	1206	154	45	43	768	2	1215	158	70	2962	94	696	294	30	172	4	26	104	448	78
SW620_LARGE_INTESTINE	SW620	large_intestine	carcinoma	adenocarcinoma		Colorectal:Carcinoma	0.05	42.3091	Resistant	10	9	Resistant				Resistant	528.861	199.487	0	0	0	0.0139019	Predicted resistant	232	6	312	14	401	313	903	40	86	18	200	320	395	188	64	814	59	707	19	98	98	12	50	148	286	77
KPNYN_AUTONOMIC_GANGLIA	KPNYN	autonomic_ganglia	neuroblastoma			CNS:Neuroblastoma	0.05	7.23648	Resistant							Resistant	806.069	2.7333	0	0	0	0.0218451	Predicted resistant	141	12	306	1091	85	789	833	6	57	10	3	10	139	245	158	3954	2	293	41	22	301	412	68	3	146	108
HCC56_LARGE_INTESTINE	HCC56	large_intestine	carcinoma	adenocarcinoma		Colorectal:Carcinoma				2.5	43	Resistant				Resistant	1002.54	859.674	1	1	1	0.746769	Predicted sensitive	126	13	176	31	210	784	1033	107	97	33	860	29	654	144	109	1178	26	352	93	47	114	3	58	50	185	104
SW1463_LARGE_INTESTINE	SW1463	large_intestine	carcinoma	adenocarcinoma		Colorectal:Carcinoma				0.44	50	Intermediate				Intermediate	656.769	695.778	0	1	0	0.543184	Predicted sensitive	69	32	142	8	538	403	782	400	74	30	696	218	1132	207	40	4814	35	520	71	20	63	4	52	401	380	104
RCM1_LARGE_INTESTINE	RCM1	large_intestine	carcinoma	adenocarcinoma		Colorectal:Carcinoma				0.115902	63	Intermediate				Intermediate	2228.87	1013.18	1	1	1	0.30407	Predicted resistant	91	28	117	22	1254	394	1233	220	91	45	1013	114	2116	138	83	3746	110	582	138	35	239	4	44	467	646	121
LC1SQSF_LUNG	LC1SQSF	lung	carcinoma	squamous_cell_carcinoma		Lung:NSCLC_Squamous	0.05	20.9554	Resistant	10	7	Resistant				Resistant	711.414	479.094	0	0	0	0.0298214	Predicted resistant	11	42	188	46	103	152	858	7	84	64	479	1	492	139	113	3113	23	159	183	33	269	81	34	2060	484	21
REC1_HAEMATOPOIETIC_AND_LYMPHOID_TISSUE	REC1	haematopoietic_and_lymphoid_tissue	lymphoid_neoplasm	mantle_cell_lymphoma		Lymphoma:NH_B_cell	0.05	-12.0546	Resistant							Resistant	286.256	575.525	0	1	0	0.0467107	Predicted resistant	81	18	298	744	403	545	1994	3597	125	41	576	2	1194	173	223	2696	41	689	526	9	231	32	33	24	808	51
HUH1_LIVER	HUH1	liver	carcinoma	hepatocellular_carcinoma		Liver:HCC	0.05	-11.8878	Resistant							Resistant	301.238	1028.42	0	1	0	0.126482	Predicted resistant	61	27	392	18	239	397	1188	112	67	43	1029	184	1935	173	52	130	51	387	9	13	75	4	33	2004	609	58
T84_LARGE_INTESTINE	T84	large_intestine	carcinoma	adenocarcinoma		Colorectal:Carcinoma	0.00023555	63.0822	Intermediate							Intermediate	895.933	744.778	0	1	0	0.145276	Predicted resistant	142	13	254	4	326	224	916	912	57	61	745	43	1062	186	36	1580	27	447	339	21	169	2	33	429	438	113
LS180_LARGE_INTESTINE	LS180	large_intestine	carcinoma	adenocarcinoma		Colorectal:Carcinoma	0.000358641	70.0178	Sensitive							Sensitive	1323.12	814.281	1	1	1	0.547551	Predicted sensitive	116	20	36	45	208	175	960	167	67	33	815	13	429	141	63	297	84	667	479	3	159	53	30	567	184	91
COV644_OVARY	COV644	ovary	carcinoma			Ovary:Carcinoma	0.05	48.9988	Resistant							Resistant	830.883	901.664	0	1	0	0.116065	Predicted resistant	26	59	104	10	196	112	3772	1275	288	87	902	880	712	345	87	4107	111	398	64	9	132	5	69	40	215	53
HT29_LARGE_INTESTINE	HT29	large_intestine	carcinoma	adenocarcinoma		Colorectal:Carcinoma	0.05	-11.8671	Resistant	10	30	Resistant	0.0001	2.17469	Resistant	Resistant	339.671	595.187	0	1	0	0.145929	Predicted resistant	157	12	623	5	589	516	804	21	44	17	596	533	666	116	46	1726	29	869	78	15	159	647	64	207	236	120
ML1_THYROID	ML1	haematopoietic_and_lymphoid_tissue	haematopoietic_neoplasm	acute_myeloid_leukaemia		Leukemia:AML											833.45	477.073	0	0	0	0.084403	Predicted resistant	33	37	82	23	77	341	793	9	138	10	477	347	377	184	134	4017	21	289	249	1	211	9	16	6903	484	37
8305C_THYROID	8305C	thyroid	carcinoma	anaplastic_carcinoma		Thyroid	0.00015547	80.2665	Sensitive							Sensitive	837.489	805.34	0	1	0	0.111356	Predicted resistant	137	4	265	36	154	396	1149	51	61	38	806	485	941	136	107	1071	112	633	249	11	119	314	42	6791	4265	87
CA46_HAEMATOPOIETIC_AND_LYMPHOID_TISSUE	CA46	haematopoietic_and_lymphoid_tissue	lymphoid_neoplasm	Burkitt_lymphoma		Lymphoma:NH_B_cell											837.274	326.206	0	0	0	0.192737	Predicted resistant	73	6	133	299	158	290	1999	615	126	13	327	254	641	199	235	86	117	478	200	23	151	348	31	7	249	98
NALM19_HAEMATOPOIETIC_AND_LYMPHOID_TISSUE	NALM19	haematopoietic_and_lymphoid_tissue	lymphoid_neoplasm	acute_lymphoblastic_B_cell_leukaemia		Leukemia:ALL											838.262	515.968	0	1	0	0.754063	Predicted sensitive	94	10	258	2075	94	720	524	4	105	42	516	9	125	247	178	824	20	419	67	7	254	413	74	10	95	136
HCC1419_BREAST	HCC1419	breast	carcinoma	ductal_carcinoma		Breast:Carcinoma	0.05	-11.693	Resistant							Resistant	162.447	170.837	0	0	0	0.00937998	Predicted resistant	43	40	110	97	267	152	434	10	125	7	171	37	196	254	112	1116	67	476	6	4	342	86	28	5	606	136
HS343T_BREAST	HS343T	breast	carcinoma			Breast:Carcinoma											844.011	216.345	0	0	0	0.0248937	Predicted resistant	147	7	233	7	95	207	1523	8	67	16	217	97	510	162	83	3247	27	473	1113	15	147	9	27	790	446	51
OUMS27_BONE	OUMS27	bone	chondrosarcoma			Bone:Sarcoma_Chondro											844.349	257.104	0	0	0	0.0816897	Predicted resistant	99	17	299	53	148	247	2034	310	49	18	258	14	569	87	66	750	39	825	1054	9	87	44	22	7238	708	43
GP2D_LARGE_INTESTINE	GP2D	large_intestine	carcinoma	adenocarcinoma		Colorectal:Carcinoma	8.95336e-05	96.2373	Sensitive							Sensitive	777.316	482.866	0	0	0	0.520615	Predicted sensitive	21	4	123	57	153	380	1113	20	88	25	483	13	419	147	47	580	53	135	285	4	243	3	23	12	265	58
NCIH2286_LUNG	NCIH2286	lung	carcinoma	small_cell_carcinoma		Lung:SCLC	0.05	46.4351	Resistant							Resistant	849.892	944.862	0	1	0	0.104826	Predicted resistant	40	17	55	11	197	1025	4709	2750	138	21	945	418	1839	220	92	5139	66	461	930	4	177	867	53	169	446	100
KNS62_LUNG	KNS62	lung	carcinoma	squamous_cell_carcinoma		Lung:NSCLC_Squamous	0.00010137	86.867	Sensitive				1.31745e-05	71.0862	Sensitive	Sensitive	2133.61	525.55	1	1	1	0.49297	Predicted resistant	74	5	260	18	382	363	927	77	43	35	526	374	330	105	38	352	83	261	997	13	106	989	24	5949	929	46
MKN1_STOMACH	MKN1	stomach	carcinoma	mixed_adenosquamous_carcinoma		Gastric:Carcinoma	0.05	33.8219	Resistant	10	18	Resistant				Resistant	915.665	688.036	0	1	0	0.138807	Predicted resistant	50	6	184	29	155	407	1993	274	63	50	688	655	852	142	105	4084	108	557	392	11	209	10	46	356	584	59
SNU245_BILIARY_TRACT	SNU245	biliary_tract	carcinoma			Biliary_Tract											852.696	588.381	0	1	0	0.520499	Predicted sensitive	49	12	298	12	277	508	509	36	64	52	589	21	564	198	34	2872	56	443	58	10	90	4	23	61	362	123
SUPHD1_HAEMATOPOIETIC_AND_LYMPHOID_TISSUE	SUPHD1	haematopoietic_and_lymphoid_tissue	lymphoid_neoplasm	Hodgkin_lymphoma		Lymphoma:Hodgkin											854.036	346.092	0	0	0	0.00322054	Predicted resistant	65	27	189	1119	97	26	1	2	328	1	346	61	2852	197	497	13	48	401	2950	14	83	6	56	12	373	59
TE11_OESOPHAGUS	TE11	oesophagus	carcinoma	squamous_cell_carcinoma		Oesophagus:Carcinoma	0.05	-11.2804	Resistant				0.0001	28.9287	Resistant	Resistant	1043.5	560.845	1	1	1	0.154379	Predicted resistant	92	25	167	26	141	318	1264	87	92	39	561	21	521	110	64	717	52	3364	333	2	152	366	3	2638	914	36
SKES1_BONE	SKES1	bone	Ewings_sarcoma-peripheral_primitive_neuroectodermal_tumour			Bone:Sarcoma_Ewing	0.05	2.56321	Resistant							Resistant	856.501	77.5699	0	0	0	0.0177083	Predicted resistant	93	4	156	128	98	461	537	16	141	2	78	297	367	189	30	260	45	517	122	2	134	419	26	24	262	92
KARPAS299_HAEMATOPOIETIC_AND_LYMPHOID_TISSUE	KARPAS299	haematopoietic_and_lymphoid_tissue	lymphoid_neoplasm	anaplastic_large_cell_lymphoma		Lymphoma:NH_T_cell	0.05	-11.1702	Resistant				0.0001	9.94441	Resistant	Resistant	2765.56	906.946	1	1	1	0.23967	Predicted resistant	16	20	165	26	95	3	1345	867	54	33	907	333	1796	260	344	41	41	399	302	120	176	15	86	49	270	75
HS839T_SKIN	HS839T	skin	malignant_melanoma			Skin:Melanoma											862.914	190.666	0	0	0	0.0131435	Predicted resistant	228	16	142	40	117	176	2025	21	52	2	191	65	550	130	76	5845	25	561	1747	28	85	4	18	53	227	45
HS934T_SKIN	HS934T	skin	malignant_melanoma			Skin:Melanoma											862.82	198.738	0	0	0	0.0228751	Predicted resistant	138	17	219	31	173	183	2244	70	107	16	199	83	482	167	161	4104	29	536	1613	2	149	18	29	172	405	44
NCIH508_LARGE_INTESTINE	NCIH508	large_intestine	carcinoma	adenocarcinoma		Colorectal:Carcinoma											1894.07	969.698	1	1	1	0.917033	Predicted sensitive	56	23	140	14	332	602	1461	118	102	63	970	73	654	142	90	2573	47	329	156	22	112	2	42	30	89	100
SNU840_OVARY	SNU840	ovary	carcinoma	Brenner_tumour		Ovary:Germline											869.504	466.79	0	0	0	0.201262	Predicted resistant	100	56	284	11	312	271	1228	59	50	38	467	1	314	67	76	5987	122	609	690	10	90	172	27	327	800	63
HCC1187_BREAST	HCC1187	breast	carcinoma	ductal_carcinoma		Breast:Carcinoma	0.05	30.1674	Resistant				0.0001	13.901	Resistant	Resistant	391.746	146.392	0	0	0	0.0120573	Predicted resistant	53	4	185	57	112	498	2328	217	67	20	147	840	413	125	64	1247	41	839	68	12	156	302	24	34	326	74
SCC25_UPPER_AERODIGESTIVE_TRACT	SCC25	upper_aerodigestive_tract	carcinoma	squamous_cell_carcinoma		Upper_Aerodigestive_Tract				0.12	50	Intermediate	0.0001	33.6258	Resistant	Intermediate	1132.08	464.437	1	0	0	0.0988489	Predicted resistant	41	15	88	15	157	273	2387	347	109	68	465	15	647	113	184	1855	51	3858	416	29	141	985	29	2788	550	41
BL70_HAEMATOPOIETIC_AND_LYMPHOID_TISSUE	BL70	haematopoietic_and_lymphoid_tissue	lymphoid_neoplasm	Burkitt_lymphoma		Lymphoma:NH_B_cell	0.05	-10.8954	Resistant							Resistant	1.5893	352.523	0	0	0	0.0204807	Predicted resistant	153	3	195	2	80	422	1296	1140	75	7	353	530	97	339	94	525	69	334	48	10	374	3	65	10	122	71
KMS11_HAEMATOPOIETIC_AND_LYMPHOID_TISSUE	KMS11	haematopoietic_and_lymphoid_tissue	lymphoid_neoplasm	plasma_cell_myeloma		Lymphoma:Multiple_Myeloma	0.05	-10.8949	Resistant				0.0001	10.143	Resistant	Resistant	429.481	1077.33	0	1	0	0.0429072	Predicted resistant	93	35	257	947	123	559	872	408	62	80	1077	429	2344	180	140	1109	16	442	2523	17	188	648	56	19	385	55
T98G_CENTRAL_NERVOUS_SYSTEM	T98G	central_nervous_system	glioma	astrocytoma_Grade_IV	glioblastoma_multiforme	CNS:Glioma_HighGrade	1.49827e-05	96.2373	Sensitive							Sensitive	877.608	450.883	0	0	0	0.333519	Predicted resistant	91	14	334	38	191	645	1674	178	45	21	451	1	567	176	158	1329	11	610	200	18	67	4	35	161	317	73
RT4_URINARY_TRACT	RT4	urinary_tract	carcinoma	transitional_cell_carcinoma	papillary_transitional_cell_carcinoma	Bladder											877.687	725.497	0	1	0	0.504766	Predicted sensitive	101	26	245	143	207	752	1373	44	38	29	726	7	493	132	42	3313	58	433	215	19	151	785	38	65	422	137
OCILY10_HAEMATOPOIETIC_AND_LYMPHOID_TISSUE	OCILY10	haematopoietic_and_lymphoid_tissue	lymphoid_neoplasm	diffuse_large_B_cell_lymphoma		Lymphoma:NH_B_cell	8.15356e-05	71.0235	Sensitive							Sensitive	879.042	273.206	0	0	0	0.170267	Predicted resistant	131	6	429	6	78	474	1785	16	28	17	274	131	503	108	30	408	29	527	1074	24	88	18	41	8	328	83
NCIH684_LIVER	NCIH684	liver	other	hepatoblastoma		Liver:Hepatoblastoma											1107.13	1057.46	1	1	1	0.564955	Predicted sensitive	72	3	507	15	577	419	674	69	60	92	1058	110	1154	139	25	1030	61	636	106	9	172	3	30	533	540	105
NCIH2122_LUNG	NCIH2122	lung	carcinoma	adenocarcinoma		Lung:NSCLC_Adeno	8.65071e-05	97.4885	Sensitive				3.64982e-07	96.9888	Sensitive	Sensitive	2325.53	1233.82	1	1	1	0.819645	Predicted sensitive	101	18	345	22	247	394	624	83	73	29	1234	7	680	106	42	582	156	597	464	20	83	1215	21	5344	345	67
COLO320_LARGE_INTESTINE	COLO320	large_intestine	carcinoma	adenocarcinoma		Colorectal:Carcinoma	0.05	-10.7581	Resistant							Resistant	941.084	153.26	0	0	0	0.146387	Predicted resistant	89	6	107	129	89	289	624	55	151	44	154	90	326	225	208	546	7	185	14	11	261	228	56	23	447	47
HS863T_BONE	HS863T	bone	Ewings_sarcoma-peripheral_primitive_neuroectodermal_tumour			Bone:Sarcoma_Ewing											884.364	148.589	0	0	0	0.00854293	Predicted resistant	146	15	231	25	197	239	3292	47	93	2	149	73	679	140	165	1354	25	527	1003	11	97	5	24	147	420	85
HEP3B217_LIVER	HEP3B217	liver	carcinoma	hepatocellular_carcinoma		Liver:HCC											885.678	853.72	0	1	0	0.291633	Predicted resistant	65	7	159	12	605	439	1473	192	63	45	854	775	768	138	74	668	37	855	3	11	204	4	44	4830	297	48
AN3CA_ENDOMETRIUM	AN3CA	endometrium	carcinoma	adenocarcinoma		Endometrium:Carcinoma	8.88096e-05	96.4986	Sensitive							Sensitive	886.443	668.054	0	1	0	0.279283	Predicted resistant	188	19	573	116	141	364	1158	13	276	26	669	424	312	168	29	4236	2	411	622	21	184	5	40	4	297	91
S117_SOFT_TISSUE	S117	soft_tissue	sarcoma			Soft_Tissue:Sarcoma_Others											886.42	600.994	0	1	0	0.133598	Predicted resistant	155	8	99	77	235	149	784	105	138	4	601	10	422	141	459	1226	111	187	218	15	120	50	25	2534	695	73
HS229T_LUNG	HS229T	lung	carcinoma	adenocarcinoma		Lung:NSCLC_Adeno											889.416	344.254	0	0	0	0.106135	Predicted resistant	328	28	364	31	167	430	3692	47	55	14	345	105	299	148	69	6228	46	882	1251	20	91	7	20	151	320	33
NCIH1385_LUNG	NCIH1385	lung	carcinoma	squamous_cell_carcinoma		Lung:NSCLC_Squamous											127.932	14.3002	0	0	0	0.000131715	Predicted resistant	87	35	316	233	295	218	801	26	42	5	15	1	1256	180	430	4543	30	122	37	3	649	82	110	102	184	159
AZ521_STOMACH	AZ521	stomach	carcinoma			Gastric:Carcinoma											1821.97	23.1622	1	0	0	0.00599455	Predicted resistant	92	5	412	30	184	230	2084	700	173	3	24	161	277	394	125	2140	24	344	1138	19	205	5	45	10	299	75
GSS_STOMACH	GSS	stomach	carcinoma	adenocarcinoma		Gastric:Carcinoma											1959.51	12.5305	1	0	0	0.0565955	Predicted resistant	132	13	149	83	563	276	2041	252	209	11	13	304	658	280	141	83	38	526	14	8	184	3	37	669	612	95
TE125T_SOFT_TISSUE	TE125T	soft_tissue	rhabdomyosarcoma			Soft_Tissue:Sarcoma_Rhabdoid											894.893	127.866	0	0	0	0.00700083	Predicted resistant	91	47	189	18	262	213	2308	12	131	23	128	118	695	144	146	3602	12	626	1244	8	156	3	26	58	251	56
COLO668_LUNG	COLO668	lung	carcinoma	small_cell_carcinoma		Lung:SCLC	0.00102082	54.13	Intermediate							Intermediate	196.431	456.638	0	0	0	0.0670686	Predicted resistant	42	16	121	731	116	315	633	14	56	12	457	497	335	195	71	2788	25	142	39	18	948	193	104	890	148	157
NCIH1155_LUNG	NCIH1155	lung	carcinoma	large_cell_carcinoma		Lung:NSCLC_Large_Cell											198.618	122.603	0	0	0	0.000903578	Predicted resistant	112	2	150	413	77	235	1235	7	150	4	123	728	393	311	119	1453	62	392	52	10	591	246	147	20	160	124
NCIH441_LUNG	NCIH441	lung	carcinoma	adenocarcinoma		Lung:NSCLC_Adeno	0.05	-18.1722	Resistant							Resistant	596.125	875.27	0	1	0	0.0435794	Predicted resistant	66	4	88	3	246	185	1291	163	76	55	876	85	2713	120	54	1217	116	1026	431	20	105	527	13	362	1452	68
MOLP8_HAEMATOPOIETIC_AND_LYMPHOID_TISSUE	MOLP8	haematopoietic_and_lymphoid_tissue	lymphoid_neoplasm	plasma_cell_myeloma		Lymphoma:Multiple_Myeloma	4.31048e-05	88.998	Sensitive							Sensitive	904.775	2133.32	0	1	0	0.418588	Predicted resistant	67	11	112	79	68	324	1238	14	62	177	2133	9	1739	165	141	1086	69	212	107	14	1217	242	42	23	509	65
PECAPJ49_UPPER_AERODIGESTIVE_TRACT	PECAPJ49	upper_aerodigestive_tract	carcinoma	squamous_cell_carcinoma		Upper_Aerodigestive_Tract											906.307	675.9	0	1	0	0.351046	Predicted resistant	64	7	203	23	202	560	1088	259	69	66	676	299	498	112	91	5223	109	588	482	24	184	393	21	8976	913	46
A549_LUNG	A549	lung	carcinoma	non_small_cell_carcinoma		Lung:NSCLC_Others	0.05	1.09123	Resistant				0.0001	7.97078	Resistant	Resistant	1801	871.072	1	1	1	0.281497	Predicted resistant	125	26	296	19	387	373	1137	578	61	31	872	3	2171	250	52	36	146	759	431	25	72	746	28	141	368	59
KYSE70_OESOPHAGUS	KYSE70	oesophagus	carcinoma	squamous_cell_carcinoma		Oesophagus:Carcinoma	0.05	16.0518	Resistant							Resistant	910.187	388.839	0	0	0	0.47872	Predicted resistant	26	18	241	98	169	372	1184	5	186	24	389	2	28	222	72	665	19	396	14	12	222	3	29	31	253	74
SNU520_STOMACH	SNU520	stomach	carcinoma			Gastric:Carcinoma											2530.17	423.008	1	0	0	0.193055	Predicted resistant	91	2	211	52	483	18	1243	243	141	51	423	84	533	128	123	1193	54	207	1011	9	185	2	18	66	118	51
LK2_LUNG	LK2	lung	carcinoma	squamous_cell_carcinoma		Lung:NSCLC_Squamous	0.05	-10.7471	Resistant	10	0	Resistant				Resistant	801.464	189.089	0	0	0	0.031985	Predicted resistant	210	18	299	11	175	273	678	17	42	11	190	1089	663	205	28	2268	53	563	111	13	79	23	35	10	218	82
HS888T_BONE	HS888T	bone	osteosarcoma			Bone:Sarcoma_Osteo											921.051	330.487	0	0	0	0.0507411	Predicted resistant	148	108	272	30	212	208	1553	17	76	16	331	202	407	167	168	6750	27	499	870	1	165	12	39	1492	380	64
SKNAS_AUTONOMIC_GANGLIA	SKNAS	autonomic_ganglia	neuroblastoma			CNS:Neuroblastoma	8.13604e-05	77.9689	Sensitive							Sensitive	922.224	437.468	0	0	0	0.195567	Predicted resistant	114	7	120	43	86	276	602	15	91	11	438	32	587	152	108	1583	8	614	82	23	298	6	54	71	331	70
YD15_SALIVARY_GLAND	YD15	salivary_gland	carcinoma	mucoepidermoid_carcinoma		Salivary_Gland											751.914	1108.13	0	1	0	0.526102	Predicted sensitive	56	4	134	24	169	891	1111	13	98	29	1108	217	264	153	35	3140	60	822	755	12	108	3	20	40	1124	55
SNU1076_UPPER_AERODIGESTIVE_TRACT	SNU1076	upper_aerodigestive_tract	carcinoma	squamous_cell_carcinoma		Upper_Aerodigestive_Tract											923.84	947.489	0	1	0	0.35289	Predicted resistant	47	5	143	14	322	432	1803	1768	71	121	948	453	616	137	177	1446	92	393	819	15	127	11	53	1536	748	86
SNU119_OVARY	SNU119	ovary	carcinoma	adenocarcinoma		Ovary:Carcinoma	0.000241227	75.0905	Sensitive							Sensitive	924.459	361.923	0	0	0	0.0754065	Predicted resistant	35	3	213	11	390	371	1766	37	88	25	362	1188	323	140	31	2340	86	615	187	9	153	887	16	8	379	47
NCIH2126_LUNG	NCIH2126	lung	carcinoma	adenocarcinoma		Lung:NSCLC_Adeno	0.05	-10.7439	Resistant							Resistant	407.062	610.912	0	1	0	0.256563	Predicted resistant	31	4	217	1	179	409	2064	454	147	36	611	15	505	213	80	146	15	634	89	6	110	1009	27	59	463	69
42MGBA_CENTRAL_NERVOUS_SYSTEM	42MGBA	central_nervous_system	glioma	astrocytoma_Grade_IV	glioblastoma_multiforme	CNS:Glioma_HighGrade											925.153	402.702	0	0	0	0.303958	Predicted resistant	155	32	320	49	122	273	3637	19	54	7	403	4	129	114	52	2272	91	850	282	7	156	2	16	751	903	35
HDMYZ_HAEMATOPOIETIC_AND_LYMPHOID_TISSUE	HDMYZ	haematopoietic_and_lymphoid_tissue	lymphoid_neoplasm	Hodgkin_lymphoma		Lymphoma:Hodgkin											927.018	500.1	0	1	0	0.0107474	Predicted resistant	94	15	135	39	132	144	2049	647	61	7	501	2	1709	183	100	3345	48	446	594	8	92	1212	33	2036	419	55
COLO741_SKIN	COLO741	skin	malignant_melanoma			Skin:Melanoma	0.05	19.7722	Resistant							Resistant	936.661	117.596	0	0	0	0.0918288	Predicted resistant	108	19	123	129	144	441	1369	23	68	19	118	11	437	101	68	634	12	641	52	3	67	87	43	1788	243	93
NCIH1755_LUNG	NCIH1755	lung	carcinoma	adenocarcinoma		Lung:NSCLC_Adeno											936.721	712.74	0	1	0	0.488854	Predicted resistant	145	26	160	56	189	455	1289	197	104	25	713	18	363	191	53	6838	19	610	76	12	96	13	30	2079	274	60
HS698T_LARGE_INTESTINE	HS698T	large_intestine	carcinoma	adenocarcinoma		Colorectal:Carcinoma											2383.73	229.345	1	0	0	0.0724125	Predicted resistant	86	36	340	21	376	155	1625	80	147	11	230	63	616	123	257	3785	11	635	1928	12	229	10	33	549	160	81
D283MED_CENTRAL_NERVOUS_SYSTEM	D283MED	central_nervous_system	primitive_neuroectodermal_tumour-medulloblastoma			CNS:Medulloblastoma											941.121	656.22	0	1	0	0.150798	Predicted resistant	69	4	490	44	409	227	637	4	138	17	657	25	642	118	83	378	31	361	54	19	154	380	88	7	226	53
PC3_PROSTATE	PC3	lung	carcinoma	non_small_cell_carcinoma		Lung:NSCLC_Adeno	0.05	0.357778	Resistant				0.0001	17.0621	Resistant	Resistant	781.157	412.506	0	0	0	0.304843	Predicted resistant	100	13	163	11	530	202	1179	104	43	17	413	232	471	155	44	3	21	854	79	2	69	104	16	6499	390	51
HS895T_SKIN	HS895T	skin	malignant_melanoma			Skin:Melanoma											949.432	359.359	0	0	0	0.0510258	Predicted resistant	108	22	185	24	242	715	3851	73	54	5	360	296	676	126	129	4235	92	772	1532	20	122	17	30	111	268	37
YH13_CENTRAL_NERVOUS_SYSTEM	YH13	central_nervous_system	glioma	astrocytoma_Grade_IV	glioblastoma_multiforme	CNS:Glioma_HighGrade							0.0001	26.6012	Resistant	Resistant	951.078	362.392	0	0	0	0.217615	Predicted resistant	105	35	336	26	226	541	2503	225	80	24	363	6	381	123	162	6567	32	564	372	26	163	8	22	789	229	81
HCC1171_LUNG	HCC1171	lung	carcinoma	non_small_cell_carcinoma		Lung:NSCLC_Others	0.05	23.0082	Resistant							Resistant	602.654	964.867	0	1	0	0.178319	Predicted resistant	128	3	159	12	400	260	1888	381	88	29	965	2	1347	246	202	181	76	565	383	5	258	475	21	94	478	54
PLCPRF5_LIVER	PLCPRF5	liver	carcinoma	hepatocellular_carcinoma		Liver:HCC	0.000127712	66.6946	Intermediate				1.02329e-05	83.4579	Sensitive	Sensitive	985.51	746.702	1	1	1	0.101337	Predicted resistant	120	41	254	2	291	236	2185	1180	96	29	747	219	1383	111	50	7662	44	528	4	7	184	3	51	11905	415	82
LP1_HAEMATOPOIETIC_AND_LYMPHOID_TISSUE	LP1	haematopoietic_and_lymphoid_tissue	lymphoid_neoplasm	plasma_cell_myeloma		Lymphoma:Multiple_Myeloma	0.05	4.13754	Resistant							Resistant	954.505	2413.89	0	1	0	0.154748	Predicted resistant	108	33	136	3564	120	142	1556	272	138	215	2414	195	3944	249	355	3	24	461	298	4	399	35	51	3	300	42
HEC151_ENDOMETRIUM	HEC151	endometrium	carcinoma	adenocarcinoma		Endometrium:Carcinoma	0.05	-10.5687	Resistant							Resistant	3535.14	686.596	1	1	1	0.44176	Predicted resistant	90	10	43	40	284	669	4569	1446	72	14	687	16	2096	124	51	475	25	880	1031	19	173	4	27	219	227	26
NCIH460_LUNG	NCIH460	lung	carcinoma	large_cell_carcinoma		Lung:NSCLC_Large_Cell	0.05	22.9859	Resistant	10	33	Resistant				Resistant	1236.4	1171.29	1	1	1	0.290399	Predicted resistant	159	5	157	92	121	180	823	21	80	31	1172	2	816	221	36	290	50	369	326	4	98	831	39	3567	181	54
HS618T_LUNG	HS618T	lung	carcinoma	adenocarcinoma		Lung:NSCLC_Adeno											956.761	310.356	1	0	0	0.0574052	Predicted resistant	222	4	364	11	225	423	2914	27	114	1	311	155	699	125	82	1102	46	730	1074	7	116	3	20	107	319	52
647V_URINARY_TRACT	647V	urinary_tract	carcinoma	transitional_cell_carcinoma		Bladder											958.363	840.548	1	1	1	0.148345	Predicted resistant	121	11	229	13	357	585	1161	271	97	46	841	1168	1231	164	123	2880	78	475	161	10	148	15	71	308	563	65
NCIH1944_LUNG	NCIH1944	lung	carcinoma	non_small_cell_carcinoma		Lung:NSCLC_Others	0.05	40.3082	Resistant	0.22	51	Intermediate				Intermediate	1247.12	710.83	1	1	1	0.197424	Predicted resistant	38	30	220	6	304	424	1212	1315	67	32	711	4	1502	180	48	663	43	447	525	15	138	6	36	520	332	54
SF295_CENTRAL_NERVOUS_SYSTEM	SF295	central_nervous_system	glioma	astrocytoma_Grade_IV	glioblastoma_multiforme	CNS:Glioma_HighGrade	2.18184e-05	95.8782	Sensitive							Sensitive	963.771	275.861	1	0	0	0.314347	Predicted resistant	185	13	229	17	109	410	5108	835	52	22	276	17	153	128	231	1021	37	498	392	15	88	14	47	2258	296	73
SNU201_CENTRAL_NERVOUS_SYSTEM	SNU201	central_nervous_system	glioma	astrocytoma_Grade_IV	glioblastoma_multiforme	CNS:Glioma_HighGrade											964.873	201.645	1	0	0	0.0856318	Predicted resistant	69	4	134	51	234	244	1613	72	53	8	202	8	502	175	408	956	44	493	385	2	98	18	31	34	307	73
KYSE30_OESOPHAGUS	KYSE30	oesophagus	carcinoma	squamous_cell_carcinoma		Oesophagus:Carcinoma	0.05	26.6593	Resistant				0.0001	9.79256	Resistant	Resistant	782.732	504.187	0	1	0	0.477711	Predicted resistant	80	279	329	15	290	661	913	201	152	16	505	110	282	148	72	8370	36	1988	276	20	131	8	25	794	727	128
CALU1_LUNG	CALU1	lung	carcinoma	squamous_cell_carcinoma		Lung:NSCLC_Squamous	0.05	-13.4785	Resistant				0.0001	7.62821	Resistant	Resistant	265.757	409.707	0	0	0	0.0114886	Predicted resistant	345	3	277	87	469	178	1473	105	66	26	410	442	669	213	121	178	62	795	368	6	91	40	35	78	427	55
CAL12T_LUNG	CAL12T	lung	carcinoma	non_small_cell_carcinoma		Lung:NSCLC_Others											970.765	339.214	1	0	0	0.07557	Predicted resistant	70	9	382	25	350	780	1387	496	102	21	340	182	2155	121	46	3958	136	763	163	19	103	1686	29	534	1612	49
CAL29_URINARY_TRACT	CAL29	urinary_tract	carcinoma	transitional_cell_carcinoma		Bladder											973.793	494.783	1	0	0	0.256623	Predicted resistant	55	123	69	28	333	539	1202	172	76	46	495	6	537	192	38	4642	73	1890	275	20	135	24	20	4144	705	56
LOUCY_HAEMATOPOIETIC_AND_LYMPHOID_TISSUE	LOUCY	haematopoietic_and_lymphoid_tissue	lymphoid_neoplasm	acute_lymphoblastic_T_cell_leukaemia		Leukemia:ALL	0.05	17.1694	Resistant	10	0	Resistant				Resistant	407.024	907.285	0	1	0	0.581147	Predicted sensitive	112	4	62	711	117	674	1279	145	81	96	908	193	638	174	138	24	14	405	190	7	223	3	39	4	171	153
NCIH2009_LUNG	NCIH2009	lung	carcinoma	adenocarcinoma		Lung:NSCLC_Adeno											749.92	850.645	0	1	0	0.0851399	Predicted resistant	113	9	156	3	280	288	1226	180	63	29	851	1120	989	277	37	280	106	393	529	8	125	4	48	69	838	60
SKLU1_LUNG	SKLU1	lung	carcinoma	adenocarcinoma		Lung:NSCLC_Adeno	9.10593e-05	89.9383	Sensitive							Sensitive	778.062	512.723	0	1	0	0.354552	Predicted resistant	90	26	230	66	2004	283	3573	1369	39	40	513	12	231	132	128	1203	32	1037	255	9	89	691	43	581	366	72
HOS_BONE	HOS	bone	osteosarcoma			Bone:Sarcoma_Osteo											982.514	363.796	1	0	0	0.440183	Predicted resistant	88	27	137	20	131	394	2361	22	96	23	364	1	531	196	32	281	65	1869	83	15	141	456	38	8	304	60
NCIH196_LUNG	NCIH196	lung	carcinoma	small_cell_carcinoma		Lung:SCLC	0.05	-10.214	Resistant							Resistant	337.185	315.693	0	0	0	0.00941909	Predicted resistant	241	21	104	31	127	14	1061	29	44	26	316	393	516	67	55	86	48	430	368	1	85	4	23	64	660	70
NCIH2030_LUNG	NCIH2030	lung	carcinoma	non_small_cell_carcinoma		Lung:NSCLC_Others											896.696	1035.36	0	1	0	0.01483	Predicted resistant	186	19	281	17	325	155	1943	2187	119	31	1036	121	5216	85	60	1368	57	644	209	18	52	686	14	4235	779	35
KMBC2_URINARY_TRACT	KMBC2	urinary_tract	carcinoma			Bladder											984.878	521.892	1	1	1	0.288832	Predicted resistant	33	23	252	85	665	662	1731	613	45	35	522	846	396	144	42	3217	63	486	68	16	1	44	38	2631	739	101
HEC59_ENDOMETRIUM	HEC59	endometrium	carcinoma	adenocarcinoma		Endometrium:Carcinoma	0.05	-10.1837	Resistant							Resistant	496.439	560.567	0	1	0	0.0452788	Predicted resistant	44	19	93	37	169	98	1185	19	78	36	561	133	410	286	36	1115	68	274	56	13	200	7	102	53	309	8
RL_HAEMATOPOIETIC_AND_LYMPHOID_TISSUE	RL	haematopoietic_and_lymphoid_tissue	lymphoid_neoplasm	B_cell_lymphoma_unspecified		Lymphoma:NH_B_cell	0.05	-10.0487	Resistant							Resistant	916.662	352.989	0	0	0	0.0809449	Predicted resistant	108	3	104	3	90	290	1241	1199	36	24	353	287	878	153	67	39	124	684	958	14	349	2	60	13	169	76
ISHIKAWAHERAKLIO02ER_ENDOMETRIUM	ISHIKAWAHERAKLIO02ER	endometrium	carcinoma	adenocarcinoma		Endometrium:Carcinoma	0.05	-9.87704	Resistant							Resistant	1186.41	392.13	1	0	0	0.181428	Predicted resistant	25	2	259	99	159	490	1124	13	93	61	393	799	254	80	204	661	53	169	675	11	206	4	37	7	116	51
SNU478_BILIARY_TRACT	SNU478	biliary_tract	carcinoma			Biliary_Tract											990.942	607.177	1	1	1	0.362356	Predicted resistant	93	45	215	41	168	936	1396	439	92	45	607	5	965	97	40	5457	97	600	128	7	101	545	40	7633	404	103
JHH6_LIVER	JHH6	liver	carcinoma	hepatocellular_carcinoma		Liver:HCC											992.079	850.203	1	1	1	0.324339	Predicted resistant	15	6	136	102	287	631	1887	300	284	55	850	346	403	142	136	1119	27	321	62	8	130	3	66	765	234	97
MJ_HAEMATOPOIETIC_AND_LYMPHOID_TISSUE	MJ	haematopoietic_and_lymphoid_tissue	lymphoid_neoplasm	mycosis_fungoides-Sezary_syndrome		Lymphoma:NH_T_cell	0.05	23.9856	Resistant							Resistant	996.713	619.249	1	1	1	0.0131636	Predicted resistant	157	6	1123	217	291	77	1083	2539	85	5	620	56	2942	197	143	4178	47	426	2012	18	208	4	57	130	212	35
NCIH661_LUNG	NCIH661	lung	carcinoma	large_cell_carcinoma		Lung:NSCLC_Large_Cell	0.05	-9.48227	Resistant				0.0001	6.16013	Resistant	Resistant	629.219	63.8164	0	0	0	0.000685054	Predicted resistant	84	30	151	13	122	216	3189	527	83	26	64	314	1596	180	37	264	39	345	31	13	95	10	26	54	533	42
SNU761_LIVER	SNU761	liver	carcinoma	hepatocellular_carcinoma		Liver:HCC											998.912	510.398	1	1	1	0.154394	Predicted resistant	61	9	182	115	565	696	920	135	151	27	511	118	674	141	320	494	30	2544	92	24	133	7	22	10607	264	83
UACC257_SKIN	UACC257	skin	malignant_melanoma			Skin:Melanoma	0.05	-9.44215	Resistant				0.0001	22.0959	Resistant	Resistant	984.433	399.859	1	0	0	0.213498	Predicted resistant	295	6	562	128	122	240	1055	5	51	27	400	435	374	198	22	1121	20	521	290	20	94	554	32	1123	316	72
BCP1_HAEMATOPOIETIC_AND_LYMPHOID_TISSUE	BCP1	haematopoietic_and_lymphoid_tissue	lymphoid_neoplasm	B_cell_lymphoma_unspecified		Lymphoma:NH_B_cell											1004.74	541.477	1	1	1	0.316321	Predicted resistant	145	15	276	3	83	183	929	9	100	57	542	239	1597	259	114	64	49	545	102	9	267	4	33	17	278	71
CALU6_LUNG	CALU6	lung	carcinoma	undifferentiated_carcinoma		Lung:NSCLC_Others	0.00115659	81.8611	Sensitive							Sensitive	980.671	560.978	1	1	1	0.266027	Predicted resistant	77	6	202	3	208	356	1156	33	86	8	561	869	1097	178	74	1410	33	634	53	16	87	10	35	307	365	134
KNS60_CENTRAL_NERVOUS_SYSTEM	KNS60	central_nervous_system	glioma	astrocytoma_Grade_IV	glioblastoma_multiforme	CNS:Glioma_HighGrade											1013.92	347.614	1	0	0	0.104292	Predicted resistant	70	98	236	52	163	526	1415	150	131	26	348	24	808	90	303	6255	34	495	316	25	57	79	40	49	350	46
SNU1077_ENDOMETRIUM	SNU1077	endometrium	carcinoma	carcinosarcoma-malignant_mesodermal_mixed_tumour		Endometrium:Others											1016.83	590.377	1	1	1	0.0809404	Predicted resistant	41	15	58	90	338	218	1732	519	108	33	591	706	1051	76	73	2693	99	549	112	15	175	3851	21	289	845	29
NCIH1339_LUNG	NCIH1339	lung	carcinoma	small_cell_carcinoma		Lung:SCLC											1093.71	1072.16	1	1	1	0.381044	Predicted resistant	21	13	226	40	76	315	2857	1090	57	19	1072	71	626	154	245	1896	46	471	42	15	175	5	28	9179	738	53
8505C_THYROID	8505C	thyroid	carcinoma	anaplastic_carcinoma		Thyroid											1017.94	442.135	1	0	0	0.06386	Predicted resistant	150	6	120	32	299	164	1878	24	77	22	442	202	941	212	162	1204	70	752	482	14	137	3	18	4999	598	39
OC314_OVARY	OC314	ovary	carcinoma	serous_carcinoma		Ovary:Carcinoma	0.05	37.3027	Resistant	0.07	56	Intermediate				Intermediate	1338.68	749.381	1	1	1	0.177506	Predicted resistant	94	23	236	38	195	378	2829	1382	121	7	750	786	837	149	62	2373	28	378	224	6	70	980	37	227	256	68
JIMT1_BREAST	JIMT1	breast	carcinoma	ductal_carcinoma		Breast:Carcinoma	0.05	-9.33368	Resistant	10	0	Resistant				Resistant	1168.61	644.15	1	1	1	0.142697	Predicted resistant	80	2	140	11	577	375	1016	15	133	31	644	655	894	82	144	3217	64	585	106	12	102	571	62	56	1421	100
TC71_BONE	TC71	bone	Ewings_sarcoma-peripheral_primitive_neuroectodermal_tumour			Bone:Sarcoma_Ewing											1025.17	215.329	1	0	0	0.135472	Predicted resistant	155	2	135	104	71	513	954	10	94	20	216	13	414	126	24	664	47	726	145	7	88	725	68	17	267	79
KALS1_CENTRAL_NERVOUS_SYSTEM	KALS1	central_nervous_system	glioma			CNS:Glioma											1024.6	229.225	1	0	0	0.0868904	Predicted resistant	75	7	148	37	154	931	1796	97	75	16	230	2112	365	141	140	1081	49	345	782	12	146	4	86	119	220	45
HCC2108_LUNG	HCC2108	lung	carcinoma	adenocarcinoma		Lung:NSCLC_Adeno											1107.77	929.408	1	1	1	0.0498458	Predicted resistant	33	5	160	81	146	371	2605	956	118	28	930	368	1530	94	122	2683	25	668	740	18	165	457	45	7982	507	42
BICR18_UPPER_AERODIGESTIVE_TRACT	BICR18	upper_aerodigestive_tract	carcinoma	squamous_cell_carcinoma		Upper_Aerodigestive_Tract											1024.86	412.431	1	0	0	0.285158	Predicted resistant	171	6	100	34	488	507	687	104	66	51	413	15	655	94	73	1417	98	4003	144	8	171	815	15	702	632	56
786O_KIDNEY	786O	kidney	carcinoma	clear_cell_renal_cell_carcinoma		Kidney:Carcinoma	0.05	24.1657	Resistant							Resistant	1026.19	492.999	1	0	0	0.110067	Predicted resistant	102	31	362	24	386	915	3180	664	62	40	493	16	4265	144	147	23	59	640	838	14	46	1710	47	2609	396	47
MEG01_HAEMATOPOIETIC_AND_LYMPHOID_TISSUE	MEG01	haematopoietic_and_lymphoid_tissue	haematopoietic_neoplasm	blast_phase_chronic_myeloid_leukaemia		Leukemia:CML	5.76183e-05	81.7798	Sensitive							Sensitive	1026.46	749.59	1	1	1	0.221105	Predicted resistant	240	3	250	86	364	528	706	2	50	44	750	1107	1838	88	44	922	34	649	36	7	164	671	34	549	395	87
DOHH2_HAEMATOPOIETIC_AND_LYMPHOID_TISSUE	DOHH2	haematopoietic_and_lymphoid_tissue	lymphoid_neoplasm	diffuse_large_B_cell_lymphoma		Lymphoma:NH_B_cell	0.05	-9.32012	Resistant							Resistant	822.676	278.245	0	0	0	0.255078	Predicted resistant	99	26	238	16	80	224	846	167	81	15	279	9	251	364	160	496	65	376	63	2	237	11	42	8	198	102
HUTU80_SMALL_INTESTINE	HUTU80	small_intestine	carcinoma	adenocarcinoma		Colorectal:Carcinoma							0.0001	0.654308	Resistant	Resistant	1388.65	9.8792	1	0	0	0.0103194	Predicted resistant	105	5	488	27	143	420	1686	20	153	20	10	152	235	223	36	4881	30	384	69	1	133	2	54	5	239	85
NCIH1355_LUNG	NCIH1355	lung	carcinoma	adenocarcinoma		Lung:NSCLC_Adeno	0.05	8.59961	Resistant							Resistant	1115.52	407.998	1	0	0	0.0568534	Predicted resistant	54	7	210	44	376	264	3448	1963	63	25	408	601	1258	139	28	181	52	644	426	14	113	5	44	906	358	32
NCIH854_LUNG	NCIH854	lung	carcinoma	adenocarcinoma		Lung:NSCLC_Adeno											1029.72	348.793	1	0	0	0.285867	Predicted resistant	80	23	194	152	305	321	1351	27	70	21	349	118	480	211	94	3302	171	339	14	32	147	4	43	79	402	173
MDAPCA2B_PROSTATE	MDAPCA2B	prostate	carcinoma	adenocarcinoma		Prostate											1034.18	467.482	1	0	0	0.331077	Predicted resistant	152	19	83	34	216	243	1859	90	192	26	468	11	364	177	75	29	51	365	292	1	94	4	26	9	160	96
RPMI7951_SKIN	RPMI7951	skin	malignant_melanoma			Skin:Melanoma	0.000121824	96.1698	Sensitive				2.47912e-06	76.0682	Sensitive	Sensitive	1096.08	954.985	1	1	1	0.322525	Predicted resistant	35	8	382	64	234	280	1839	65	45	50	955	1206	660	186	213	1888	41	437	320	16	300	6	44	2515	570	59
SCC15_UPPER_AERODIGESTIVE_TRACT	SCC15	upper_aerodigestive_tract	carcinoma	squamous_cell_carcinoma		Upper_Aerodigestive_Tract				10	7.5	Resistant				Resistant	1039.86	594.464	1	1	1	0.0499218	Predicted resistant	62	21	131	9	181	346	4871	3962	101	102	595	344	1738	121	304	1501	244	2214	1164	15	177	425	53	9883	528	85
CCFSTTG1_CENTRAL_NERVOUS_SYSTEM	CCFSTTG1	central_nervous_system	glioma	astrocytoma		CNS:Glioma											1041.13	84.1924	1	0	0	0.0438923	Predicted resistant	280	5	386	127	121	318	4243	312	60	15	85	715	164	128	62	3892	28	571	952	10	112	23	22	4713	404	66
T47D_BREAST	T47D	breast	carcinoma	ductal_carcinoma		Breast:Carcinoma	0.05	-9.21497	Resistant				0.0001	8.75576	Resistant	Resistant	536.298	231.212	0	0	0	0.123536	Predicted resistant	88	11	112	7	376	382	2307	63	103	9	232	68	441	97	51	20	49	914	613	21	90	2	32	12	362	62
HCC95_LUNG	HCC95	lung	carcinoma	squamous_cell_carcinoma		Lung:NSCLC_Squamous	0.05	-9.18404	Resistant	10	44	Resistant				Resistant	684.504	380.084	0	0	0	0.127914	Predicted resistant	36	3	115	167	187	272	1341	46	75	30	380	3	281	193	39	2478	24	237	333	14	205	491	61	1104	479	41
FTC238_THYROID	FTC238	thyroid	carcinoma	follicular_carcinoma		Thyroid											1044.79	582.708	1	1	1	0.0720335	Predicted resistant	45	3	139	65	210	245	1281	29	100	43	583	1346	281	311	241	1806	25	202	124	16	207	5	123	923	526	28
SNU1214_UPPER_AERODIGESTIVE_TRACT	SNU1214	upper_aerodigestive_tract	carcinoma	squamous_cell_carcinoma		Upper_Aerodigestive_Tract											1045	568.77	1	1	1	0.161781	Predicted resistant	75	4	129	38	239	433	1461	264	159	59	569	80	569	52	258	2307	52	540	510	10	148	426	30	497	191	44
TT2609C02_THYROID	TT2609C02	thyroid	carcinoma	follicular_carcinoma		Thyroid	0.05	39.2311	Resistant							Resistant	1048.97	812.448	1	1	1	0.181069	Predicted resistant	196	17	122	40	298	600	897	25	114	28	813	349	1308	208	50	2026	52	538	517	8	144	3	43	4683	421	64
HS172T_URINARY_TRACT	HS172T	urinary_tract	carcinoma			Bladder											1054.86	164.917	1	0	0	0.0647157	Predicted resistant	94	5	255	22	177	458	2935	84	381	4	165	73	463	142	315	843	7	428	1419	8	177	12	22	11025	302	50
PECAPJ41CLONED2_UPPER_AERODIGESTIVE_TRACT	PECAPJ41CLONED2	upper_aerodigestive_tract	carcinoma	squamous_cell_carcinoma		Upper_Aerodigestive_Tract	0.05	-9.1831	Resistant							Resistant	766.319	528.447	0	1	0	0.0874802	Predicted resistant	38	36	89	1	133	333	12267	6157	94	70	529	63	951	140	85	3453	76	449	678	15	117	251	20	5396	932	35
BICR56_UPPER_AERODIGESTIVE_TRACT	BICR56	upper_aerodigestive_tract	carcinoma	squamous_cell_carcinoma		Upper_Aerodigestive_Tract											1070.05	1089.08	1	1	1	0.145224	Predicted resistant	31	135	83	17	265	386	1534	1205	137	94	1089	256	1385	114	307	7050	118	462	302	29	227	100	46	12475	844	66
COV504_OVARY	COV504	ovary	carcinoma			Ovary:Carcinoma	0.05	-8.99341	Resistant				0.0001	6.39475	Resistant	Resistant	815.794	558.36	0	1	0	0.258446	Predicted resistant	230	20	59	92	310	280	1530	133	79	25	559	2	433	142	74	3741	264	878	407	11	72	89	79	2394	264	51
HH_HAEMATOPOIETIC_AND_LYMPHOID_TISSUE	HH	haematopoietic_and_lymphoid_tissue	lymphoid_neoplasm	adult_T_cell_lymphoma-leukaemia		Leukemia:ALL	0.05	34.4767	Resistant				0.0001	13.2101	Resistant	Resistant	799.535	746.697	0	1	0	0.0794476	Predicted resistant	107	8	225	13	93	21	1680	1385	123	11	747	343	2538	265	321	17	34	379	251	7	104	15	147	15	189	68
DB_HAEMATOPOIETIC_AND_LYMPHOID_TISSUE	DB	haematopoietic_and_lymphoid_tissue	lymphoid_neoplasm	diffuse_large_B_cell_lymphoma		Lymphoma:NH_B_cell	0.05	3.29017	Resistant				0.0001	24.8895	Resistant	Resistant	644.501	337.472	0	0	0	0.0738001	Predicted resistant	152	18	626	1297	209	279	972	1493	244	16	338	12	665	191	51	417	73	519	4	5	214	808	48	5	315	120
HUNS1_HAEMATOPOIETIC_AND_LYMPHOID_TISSUE	HUNS1	haematopoietic_and_lymphoid_tissue	lymphoid_neoplasm	plasma_cell_myeloma		Lymphoma:Multiple_Myeloma											1073.82	339.414	1	0	0	0.130647	Predicted resistant	177	13	281	335	177	648	1385	2167	76	54	340	45	2898	95	88	27	55	642	2328	11	238	6	79	6	237	63
NCIH2023_LUNG	NCIH2023	lung	carcinoma	adenocarcinoma		Lung:NSCLC_Adeno	0.000134182	56.7859	Intermediate							Intermediate	1078.01	568.153	1	1	1	0.232685	Predicted resistant	98	23	196	40	174	250	1678	1428	76	11	568	8	1016	266	109	763	62	336	573	8	148	52	23	932	297	30
MG63_BONE	MG63	bone	osteosarcoma			Bone:Sarcoma_Osteo											1084.53	300.356	1	0	0	0.221087	Predicted resistant	133	17	129	47	130	349	1336	25	78	14	301	1	330	156	46	8865	56	650	411	11	149	64	50	142	211	33
SW1088_CENTRAL_NERVOUS_SYSTEM	SW1088	central_nervous_system	glioma			CNS:Glioma	0.05	40.2971	Resistant							Resistant	1086.32	484.614	1	0	0	0.398763	Predicted resistant	160	22	155	32	249	507	1908	62	70	19	485	17	410	195	169	7624	30	501	1	20	136	10	14	856	278	58
HS604T_HAEMATOPOIETIC_AND_LYMPHOID_TISSUE	HS604T	haematopoietic_and_lymphoid_tissue	lymphoid_neoplasm	Hodgkin_lymphoma		Lymphoma:Hodgkin											1086	219.736	1	0	0	0.0321576	Predicted resistant	96	7	404	39	208	284	962	240	114	13	220	151	610	138	140	2883	38	506	2495	21	198	266	15	372	310	110
NCIH23_LUNG	NCIH23	lung	carcinoma	non_small_cell_carcinoma		Lung:NSCLC_Others	0.05	-8.8644	Resistant							Resistant	1468.75	141.22	1	0	0	0.00742898	Predicted resistant	103	12	162	25	80	83	4006	2399	60	6	142	49	533	236	63	6369	24	1343	449	20	61	596	40	963	465	52
NCIH727_LUNG	NCIH727	lung	carcinoid-endocrine_tumour			Endocrine	0.05	12.9995	Resistant							Resistant	1160.7	489.099	1	0	0	0.191551	Predicted resistant	77	7	109	99	201	160	1626	29	73	8	489	259	502	295	37	365	22	642	15	16	255	482	29	2750	714	243
CORL23_LUNG	CORL23	lung	carcinoma	large_cell_carcinoma		Lung:NSCLC_Large_Cell	0.05	42.1093	Resistant				1.31081e-05	67.2344	Intermediate	Intermediate	1028.32	491.231	1	0	0	0.133672	Predicted resistant	41	12	181	2	580	688	924	232	69	31	492	353	1608	93	71	1859	57	925	111	12	153	2	25	218	1484	83
IALM_LUNG	IALM	lung	carcinoma	large_cell_carcinoma		Lung:NSCLC_Large_Cell											1177.95	199.571	1	0	0	0.0266538	Predicted resistant	88	18	237	26	389	239	1853	120	122	28	200	1145	632	124	129	1101	47	1130	161	17	131	4	27	183	498	56
ISTMES1_PLEURA	ISTMES1	pleura	mesothelioma			Lung:Mesothelioma				0.0064	89	Sensitive				Sensitive	1097.17	1124.43	1	1	1	0.476277	Predicted resistant	112	32	158	31	232	769	1810	603	146	4	1125	2	2340	329	142	276	176	1068	256	11	95	502	31	100	238	71
M07E_HAEMATOPOIETIC_AND_LYMPHOID_TISSUE	M07E	haematopoietic_and_lymphoid_tissue	haematopoietic_neoplasm	acute_myeloid_leukaemia	M7	Leukemia:AML											1106.94	324.473	1	0	0	0.147191	Predicted resistant	81	15	499	966	325	445	1109	52	408	83	325	160	671	331	128	667	24	310	122	9	376	20	60	67	227	116
NCIH647_LUNG	NCIH647	lung	carcinoma	mixed_adenosquamous_carcinoma		Lung:NSCLC_Adeno				0.008	66	Intermediate				Intermediate	1126.75	1052.8	1	1	1	0.36045	Predicted resistant	61	24	192	16	311	727	2888	1058	111	36	1053	26	2007	124	42	1179	216	871	290	13	90	669	3	9692	394	97
KPNRTBM1_AUTONOMIC_GANGLIA	KPNRTBM1	autonomic_ganglia	neuroblastoma			CNS:Neuroblastoma											1108.05	15.5129	1	0	0	0.133182	Predicted resistant	145	6	296	1672	96	604	984	3	152	6	16	29	20	218	284	370	21	250	61	4	292	68	112	9	145	173
SW1573_LUNG	SW1573	lung	carcinoma	squamous_cell_carcinoma		Lung:NSCLC_Squamous				10	18	Resistant				Resistant	1204.2	635.931	1	1	1	0.218006	Predicted resistant	31	18	464	43	573	218	1686	25	160	3	636	1	1139	161	178	5742	94	387	2274	11	131	337	51	2	325	67
RD_SOFT_TISSUE	RD	soft_tissue	rhabdomyosarcoma	embryonal		Soft_Tissue:Sarcoma_Rhabdoid	9.60641e-05	81.0198	Sensitive							Sensitive	1109.08	439.081	1	0	0	0.168244	Predicted resistant	108	3	94	60	123	373	1181	1	177	6	439	360	708	408	84	984	26	306	70	12	150	195	45	762	373	58
BICR6_UPPER_AERODIGESTIVE_TRACT	BICR6	upper_aerodigestive_tract	carcinoma	squamous_cell_carcinoma		Upper_Aerodigestive_Tract	0.000192797	84.0967	Sensitive							Sensitive	1050.14	835.882	1	1	1	0.238851	Predicted resistant	36	34	38	44	276	661	1894	1801	118	47	836	63	1289	168	88	1085	163	2836	461	20	129	644	41	6253	792	63
BCPAP_THYROID	BCPAP	thyroid	carcinoma	papillary_carcinoma		Thyroid											1110.06	383.944	1	0	0	0.328943	Predicted resistant	46	12	191	14	163	534	1193	48	122	49	384	184	784	79	162	649	12	763	173	16	134	186	28	10212	1713	139
HCC4006_LUNG	HCC4006	lung	carcinoma	adenocarcinoma		Lung:NSCLC_Adeno											1110.53	820.892	1	1	1	0.230852	Predicted resistant	92	14	78	13	338	395	1113	252	55	80	821	7	487	223	65	987	82	779	952	10	139	481	17	890	309	45
HCC2279_LUNG	HCC2279	lung	carcinoma	adenocarcinoma		Lung:NSCLC_Adeno											1112.45	998.899	1	1	1	0.530805	Predicted sensitive	65	4	111	40	329	699	2192	1572	44	34	999	16	841	257	85	757	57	1100	654	6	177	1535	23	112	557	55
SHP77_LUNG	SHP77	lung	carcinoma	small_cell_carcinoma		Lung:SCLC	0.05	-7.41043	Resistant							Resistant	9.0189	193.364	0	0	0	0.00262666	Predicted resistant	86	28	151	491	79	212	536	18	113	11	194	229	616	200	121	1172	26	372	23	11	169	6	120	462	302	80
SNU620_STOMACH	SNU620	stomach	carcinoma			Gastric:Carcinoma											2789.41	664.404	1	1	1	0.764524	Predicted sensitive	92	1	296	33	228	347	1005	166	118	30	665	59	577	225	97	1059	58	430	154	11	244	3	29	175	224	75
SKOV3_OVARY	SKOV3	ovary	carcinoma	adenocarcinoma		Ovary:Carcinoma	0.05	39.3929	Resistant	10	16	Resistant	0.0001	9.38628	Resistant	Resistant	699.461	569.699	0	1	0	0.0886558	Predicted resistant	150	13	116	35	385	125	2800	97	45	47	570	8	554	255	36	6270	113	594	140	5	157	157	21	972	551	62
HCC1588_LUNG	HCC1588	lung	carcinoma	squamous_cell_carcinoma		Lung:NSCLC_Squamous				0.01	92	Sensitive				Sensitive	3140.6	579.34	1	1	1	0.871325	Predicted sensitive	67	19	335	7	546	634	1443	416	99	32	580	2	361	232	84	1358	82	475	585	60	223	3	28	911	157	74
ALEXANDERCELLS_LIVER	ALEXANDERCELLS	liver	carcinoma	hepatocellular_carcinoma		Liver:HCC											1128.01	1136.15	1	1	1	0.126906	Predicted resistant	113	3	133	7	278	132	2388	2111	72	30	1136	235	1276	229	58	294	23	366	7	18	212	6	90	9042	451	67
NCIH1792_LUNG	NCIH1792	lung	carcinoma	adenocarcinoma		Lung:NSCLC_Adeno	9.79881e-05	93.3291	Sensitive							Sensitive	1278.51	350.54	1	0	0	0.231992	Predicted resistant	92	9	488	22	157	549	1166	254	58	24	351	502	967	179	75	121	54	485	233	9	108	1357	22	1733	517	52
COLO704_OVARY	COLO704	ovary	carcinoma			Ovary:Carcinoma	0.05	8.35351	Resistant				0.0001	30.8081	Resistant	Resistant	35.0309	6.594	0	0	0	0.000248641	Predicted resistant	96	11	94	71	138	248	628	3	300	10	7	462	277	223	93	44	9	295	17	14	200	4	46	11	353	73
PC14_LUNG	PC14	lung	carcinoma	non_small_cell_carcinoma		Lung:NSCLC_Others	8.60507e-05	85.5246	Sensitive				3.90976e-05	62.6386	Intermediate	Sensitive	515.67	766.16	0	1	0	0.12356	Predicted resistant	56	32	138	32	275	432	813	48	59	26	767	1542	636	460	59	203	57	757	160	16	161	47	129	56	567	68
NH6_AUTONOMIC_GANGLIA	NH6	autonomic_ganglia	neuroblastoma			CNS:Neuroblastoma											1133.74	49.218	1	0	0	0.0492767	Predicted resistant	190	19	63	991	97	734	1204	10	144	3	50	46	119	200	158	11080	24	285	47	20	236	197	67	36	173	66
SW900_LUNG	SW900	lung	carcinoma	squamous_cell_carcinoma		Lung:NSCLC_Squamous							7.65698e-06	94.2298	Sensitive	Sensitive	1286.9	389.266	1	0	0	0.318521	Predicted resistant	96	30	227	22	386	458	1822	596	72	44	390	12	954	182	42	1348	167	1060	77	24	41	581	26	3353	426	50
RERFLCAD1_LUNG	RERFLCAD1	lung	carcinoma	adenocarcinoma		Lung:NSCLC_Adeno							0.0001	0.889454	Resistant	Resistant	1299.41	1553.6	1	1	1	0.114402	Predicted resistant	58	3	113	19	275	245	1770	360	72	33	1554	6	2752	205	65	2341	83	958	1710	15	124	21	29	825	522	64
BICR16_UPPER_AERODIGESTIVE_TRACT	BICR16	upper_aerodigestive_tract	carcinoma	squamous_cell_carcinoma		Upper_Aerodigestive_Tract	0.000321748	57.9723	Intermediate							Intermediate	1139.49	744.22	1	1	1	0.245495	Predicted resistant	56	5	142	47	269	303	1076	708	52	33	744	3	2562	61	38	1486	88	668	164	3	84	819	4	4727	901	56
SNUC1_LARGE_INTESTINE	SNUC1	large_intestine	carcinoma	adenocarcinoma		Colorectal:Carcinoma	0.000172007	80.4794	Sensitive				2.94504e-05	56.5467	Intermediate	Sensitive	626.375	426.291	0	0	0	0.562096	Predicted sensitive	87	24	183	10	202	906	692	145	28	59	427	38	389	152	53	437	69	466	26	37	126	7	39	62	238	81
NCIH2444_LUNG	NCIH2444	lung	carcinoma	non_small_cell_carcinoma		Lung:NSCLC_Others											1310.18	409.338	1	0	0	0.329866	Predicted resistant	117	32	281	23	550	621	1088	595	93	19	410	235	996	110	84	712	65	455	303	4	103	673	24	10457	563	62
NCIH2110_LUNG	NCIH2110	lung	carcinoma	non_small_cell_carcinoma		Lung:NSCLC_Others											1148.72	735.047	1	1	1	0.0751585	Predicted resistant	12	8	148	6	135	346	1327	490	137	45	735	851	845	199	41	1048	46	356	338	16	173	27	71	3113	209	13
NCIH358_LUNG	NCIH358	lung	carcinoma	bronchioloalveolar_adenocarcinoma		Lung:NSCLC_Adeno	0.000163756	71.822	Sensitive							Sensitive	1327.39	723.809	1	1	1	0.253487	Predicted resistant	130	19	106	7	171	206	1409	35	38	29	724	405	537	134	33	256	65	720	152	16	203	537	29	402	614	35
LU99_LUNG	LU99	lung	carcinoma	large_cell_carcinoma		Lung:NSCLC_Large_Cell	0.05	-6.98082	Resistant							Resistant	876.376	714.753	0	1	0	0.100031	Predicted resistant	63	17	605	54	151	269	1662	182	68	32	715	3	1361	133	104	6592	90	511	520	3	201	5	45	24	371	34
U87MG_CENTRAL_NERVOUS_SYSTEM	U87MG	central_nervous_system	glioma	astrocytoma		CNS:Glioma							0.0001	19.9868	Resistant	Resistant	1159.77	375.818	1	0	0	0.157597	Predicted resistant	255	23	494	51	465	695	1191	74	83	22	376	1	940	127	343	1434	12	973	431	10	94	6	64	2006	285	83
NCIH1734_LUNG	NCIH1734	lung	carcinoma	adenocarcinoma		Lung:NSCLC_Adeno	9.09716e-05	89.5074	Sensitive							Sensitive	1424.24	728.219	1	1	1	0.316406	Predicted resistant	147	25	316	47	130	203	1369	58	61	23	728	936	407	74	19	2666	70	747	434	5	95	450	26	3056	274	50
WM88_SKIN	WM88	skin	malignant_melanoma			Skin:Melanoma	0.05	-8.81842	Resistant							Resistant	1649.95	418.211	1	0	0	0.20374	Predicted resistant	30	7	414	118	113	63	1234	15	71	17	419	8	209	117	167	1304	20	228	227	17	278	1	74	216	275	43
TE1_OESOPHAGUS	TE1	oesophagus	carcinoma	squamous_cell_carcinoma		Oesophagus:Carcinoma	0.05	-8.7668	Resistant							Resistant	660.532	156.452	0	0	0	0.0361848	Predicted resistant	79	210	174	41	329	832	4575	1242	68	21	157	348	273	71	41	4749	116	1045	487	12	185	508	37	143	692	41
MDAMB157_BREAST	MDAMB157	breast	carcinoma	ductal_carcinoma	medullary	Breast:Carcinoma				10	37.9	Resistant	0.0001	13.2383	Resistant	Resistant	271.761	528.971	0	1	0	0.00861381	Predicted resistant	188	3	93	37	102	270	1457	13	70	3	529	982	659	155	25	474	18	375	165	18	124	22	38	522	327	41
SNU1196_BILIARY_TRACT	SNU1196	biliary_tract	carcinoma			Biliary_Tract											1168.32	817.153	1	1	1	0.261959	Predicted resistant	97	17	309	24	1403	347	474	55	87	27	817	11	1228	186	48	4284	77	828	165	11	92	204	58	2298	865	87
KM12_LARGE_INTESTINE	KM12	large_intestine	carcinoma	adenocarcinoma		Colorectal:Carcinoma	0.05	5.9815	Resistant	10	31	Resistant				Resistant	2552.16	714.971	1	1	1	0.73029	Predicted sensitive	50	12	93	24	251	355	1273	32	69	26	715	451	666	172	33	483	9	676	299	21	156	5	6	294	345	62
HS688AT_SKIN	HS688AT	skin	malignant_melanoma			Skin:Melanoma											1172.11	168.396	1	0	0	0.0271951	Predicted resistant	381	9	335	26	142	230	2372	12	42	5	169	60	433	146	135	3303	23	571	1676	4	147	6	28	50	196	62
NCIH2291_LUNG	NCIH2291	lung	carcinoma	adenocarcinoma		Lung:NSCLC_Adeno											1427.1	941.972	1	1	1	0.117091	Predicted resistant	89	34	191	28	458	333	1438	347	76	53	942	247	2306	137	64	1182	81	522	1578	11	95	638	30	1256	745	61
HCC44_LUNG	HCC44	lung	carcinoma	adenocarcinoma		Lung:NSCLC_Adeno	0.05	37.0277	Resistant				0.0001	5.60772	Resistant	Resistant	2238.36	457.819	1	0	0	0.540449	Predicted sensitive	72	47	212	27	140	506	2164	546	59	26	458	945	272	102	207	2866	77	487	108	14	123	857	40	7391	366	41
KMS27_HAEMATOPOIETIC_AND_LYMPHOID_TISSUE	KMS27	haematopoietic_and_lymphoid_tissue	lymphoid_neoplasm	plasma_cell_myeloma		Lymphoma:Multiple_Myeloma	0.05	29.0906	Resistant							Resistant	1178.53	968.873	1	1	1	0.147229	Predicted resistant	129	19	272	858	66	322	1264	2331	68	97	969	318	2009	100	76	893	58	762	837	17	635	5	26	6	362	56
HS281T_BREAST	HS281T	breast	carcinoma			Breast:Carcinoma											1182.64	200.928	1	0	0	0.0212554	Predicted resistant	189	4	301	33	166	172	1608	28	80	10	201	83	603	138	115	2957	33	460	1404	7	142	15	24	82	526	54
SCABER_URINARY_TRACT	SCABER	urinary_tract	carcinoma	transitional_cell_carcinoma		Bladder	0.05	-8.6237	Resistant							Resistant	610.552	418.964	0	0	0	0.0491111	Predicted resistant	7	4	167	35	205	202	4780	795	78	32	419	299	529	74	62	541	81	845	389	10	144	361	4	3152	1231	48
P31FUJ_HAEMATOPOIETIC_AND_LYMPHOID_TISSUE	P31FUJ	haematopoietic_and_lymphoid_tissue	haematopoietic_neoplasm	acute_myeloid_leukaemia	M5	Leukemia:AML	0.05	-8.40668	Resistant							Resistant	69.4075	634.053	0	1	0	0.113265	Predicted resistant	88	4	134	650	85	909	1159	17	80	28	634	398	742	91	180	460	33	540	299	11	60	5	53	2012	111	73
LU65_LUNG	LU65	lung	carcinoma	non_small_cell_carcinoma		Lung:NSCLC_Others	0.00055314	58.6657	Intermediate	10	27	Resistant				Intermediate	1991.76	636.719	1	1	1	0.104595	Predicted resistant	106	6	244	27	104	184	1043	251	81	21	637	1038	594	147	76	3033	66	1040	758	13	54	9	60	594	185	61
MORCPR_LUNG	MORCPR	lung	carcinoma	adenocarcinoma		Lung:NSCLC_Adeno	0.05	23.6444	Resistant							Resistant	1541.58	441.229	1	0	0	0.198688	Predicted resistant	41	27	123	123	177	293	832	50	127	2	442	113	618	199	101	5015	39	513	6	10	97	2	39	1650	331	58
BICR22_UPPER_AERODIGESTIVE_TRACT	BICR22	upper_aerodigestive_tract	carcinoma	squamous_cell_carcinoma		Upper_Aerodigestive_Tract	0.000943955	51.6407	Intermediate							Intermediate	1194.23	874.425	1	1	1	0.146217	Predicted resistant	39	46	98	4	182	550	962	1251	150	61	875	10	2043	133	398	4719	64	2400	465	21	198	535	28	6933	397	54
RERFLCAD2_LUNG	RERFLCAD2	lung	carcinoma	adenocarcinoma		Lung:NSCLC_Adeno											1646.89	770.292	1	1	1	0.53114	Predicted sensitive	53	2	25	40	219	452	4206	4188	58	7	771	404	1939	107	87	827	277	952	291	36	118	940	26	2141	887	66
RMUGS_OVARY	RMUGS	ovary	carcinoma	adenocarcinoma		Ovary:Carcinoma	0.05	-8.35978	Resistant	10	0	Resistant				Resistant	822.811	759.062	0	1	0	0.740182	Predicted sensitive	70	29	317	29	367	698	899	79	42	21	759	39	1080	108	35	17	94	1180	199	19	90	5	19	24	508	49
WSUDLCL2_HAEMATOPOIETIC_AND_LYMPHOID_TISSUE	WSUDLCL2	haematopoietic_and_lymphoid_tissue	lymphoid_neoplasm	diffuse_large_B_cell_lymphoma		Lymphoma:NH_B_cell	0.05	44.8448	Resistant							Resistant	1202.95	353.2	1	0	0	0.298774	Predicted resistant	61	5	135	2934	96	239	1350	492	68	8	354	266	522	354	131	2929	81	315	59	2	392	383	43	1	327	113
T3M10_LUNG	T3M10	lung	carcinoma	large_cell_carcinoma		Lung:NSCLC_Large_Cell											1772.64	803.631	1	1	1	0.617023	Predicted sensitive	150	26	275	32	511	396	886	123	83	40	804	3078	659	88	77	95	35	1365	593	20	26	1150	33	2686	177	66
CAMA1_BREAST	CAMA1	breast	carcinoma			Breast:Carcinoma	7.72827e-05	69.7411	Intermediate	10	44.5	Resistant				Intermediate	191.615	374.051	0	0	0	0.194501	Predicted resistant	58	20	231	72	131	630	766	3	49	10	374	156	38	173	47	1209	56	1306	19	2	132	61	56	5	218	60
NCIH1573_LUNG	NCIH1573	lung	carcinoma	adenocarcinoma		Lung:NSCLC_Adeno	0.000150885	63.1105	Intermediate				0.0001	11.2676	Resistant	Intermediate	1205.03	682.588	1	1	1	0.18679	Predicted resistant	51	20	97	6	148	321	878	509	124	15	683	230	770	132	123	995	60	1471	121	17	119	746	64	1158	257	80
C2BBE1_LARGE_INTESTINE	C2BBE1	large_intestine	carcinoma	adenocarcinoma		Colorectal:Carcinoma							0.0001	19.0606	Resistant	Resistant	869.791	790.149	0	1	0	0.353743	Predicted resistant	74	19	46	21	1008	229	1245	110	59	11	791	48	1055	138	34	2415	42	858	2	17	146	6	43	26	531	71
SNU738_CENTRAL_NERVOUS_SYSTEM	SNU738	central_nervous_system	glioma	oligodendroglioma		CNS:Glioma	0.05	-8.32602	Resistant							Resistant	731.515	914.633	0	1	0	0.125237	Predicted resistant	67	20	127	35	391	141	1029	159	85	32	915	4	860	218	185	565	94	254	51	17	128	34	56	36	584	59
GLC82_LUNG	GLC82	lung	carcinoma	adenocarcinoma		Lung:NSCLC_Adeno											1218.77	519.131	1	1	1	0.155215	Predicted resistant	72	72	51	38	159	286	1363	291	85	24	519	541	575	29	51	8074	39	719	179	30	72	5	38	1409	232	71
SNU308_BILIARY_TRACT	SNU308	biliary_tract	carcinoma			Biliary_Tract											1221.83	458.304	1	0	0	0.17927	Predicted resistant	27	25	220	39	217	346	1012	114	61	39	459	422	648	104	55	2373	56	408	742	16	97	11	24	2921	621	111
ZR751_BREAST	ZR751	breast	carcinoma	ductal_carcinoma		Breast:Carcinoma	0.05	-8.25582	Resistant				0.0001	9.84911	Resistant	Resistant	475.947	310.966	0	0	0	0.0804575	Predicted resistant	116	38	51	360	200	996	1253	36	89	12	311	63	561	190	52	6965	44	1861	83	21	118	135	34	15	213	72
ACCMESO1_PLEURA	ACCMESO1	pleura	mesothelioma			Lung:Mesothelioma	0.05	8.58865	Resistant							Resistant	1225.59	582.729	1	1	1	0.0311244	Predicted resistant	63	4	106	24	284	214	2045	1315	53	15	583	9	3064	127	73	559	52	586	352	16	46	3	25	125	500	25
NCIH1373_LUNG	NCIH1373	lung	carcinoma	adenocarcinoma		Lung:NSCLC_Adeno											2299.46	754.423	1	1	1	0.156436	Predicted resistant	185	21	118	10	222	132	1632	128	95	56	755	276	885	120	71	2024	75	794	187	4	120	872	40	1284	219	61
NCIH2405_LUNG	NCIH2405	lung	carcinoma	adenocarcinoma		Lung:NSCLC_Adeno	0.000144359	85.7316	Sensitive							Sensitive	1230.52	1189.74	1	1	1	0.246883	Predicted resistant	51	4	99	9	307	330	1908	912	152	41	1190	9	1955	263	270	3228	45	403	440	24	175	82	64	3658	463	65
HS683_CENTRAL_NERVOUS_SYSTEM	HS683	central_nervous_system	glioma			CNS:Glioma											1232.94	293.778	1	0	0	0.331424	Predicted resistant	161	13	179	40	131	556	3550	370	61	18	294	10	270	118	107	4782	34	716	324	17	94	3	29	3599	246	67
SQ1_LUNG	SQ1	lung	carcinoma	squamous_cell_carcinoma		Lung:NSCLC_Squamous				10	30	Resistant				Resistant	1233.09	750.013	1	1	1	0.0659452	Predicted resistant	186	37	271	6	484	515	1269	960	48	27	751	117	3111	159	56	4218	28	800	305	36	170	5	16	302	541	39
769P_KIDNEY	769P	kidney	carcinoma	clear_cell_renal_cell_carcinoma		Kidney:Carcinoma	0.000256817	64.1131	Intermediate	10	38	Resistant				Intermediate	2780.5	600.007	1	1	1	0.366574	Predicted resistant	103	21	399	113	317	921	1896	2655	66	35	601	3	1740	141	119	342	68	826	2593	1	129	2433	63	3438	279	36
BC3C_URINARY_TRACT	BC3C	urinary_tract	carcinoma	transitional_cell_carcinoma		Bladder											1242.34	460.37	1	0	0	0.148556	Predicted resistant	120	40	169	21	225	199	701	76	122	57	461	3	1240	143	80	1026	61	392	212	10	449	316	32	6630	608	43
G402_SOFT_TISSUE	G402	soft_tissue	rhabdoid_tumour			Soft_Tissue:Sarcoma_Rhabdoid	0.05	-8.0076	Resistant							Resistant	1999.83	624.697	1	1	1	0.218847	Predicted resistant	60	3	503	13	110	310	1222	7	81	14	625	66	716	199	36	4122	54	205	644	12	176	22	47	13	224	87
IPC298_SKIN	IPC298	skin	malignant_melanoma			Skin:Melanoma	0.05	-7.91809	Resistant							Resistant	883.256	340.768	0	0	0	0.134236	Predicted resistant	262	11	143	68	105	166	1260	13	54	34	341	510	254	116	71	357	45	529	144	10	70	5	24	74	432	65
NCIH1650_LUNG	NCIH1650	lung	carcinoma	bronchioloalveolar_adenocarcinoma		Lung:NSCLC_Adeno	0.05	-7.75756	Resistant				0.0001	8.21773	Resistant	Resistant	362.284	595.378	0	1	0	0.0615597	Predicted resistant	61	25	170	12	424	475	1765	91	50	22	596	3	1193	184	92	377	34	354	168	8	271	549	42	72	989	31
NCIH1048_LUNG	NCIH1048	lung	carcinoma	small_cell_carcinoma		Lung:SCLC	0.05	32.4042	Resistant				0.0001	4.71038	Resistant	Resistant	524.188	263.428	0	0	0	0.0619291	Predicted resistant	177	21	191	630	117	445	1334	23	101	8	264	702	332	194	73	315	33	280	446	3	217	1206	51	58	163	81
YD10B_UPPER_AERODIGESTIVE_TRACT	YD10B	upper_aerodigestive_tract	carcinoma	squamous_cell_carcinoma		Upper_Aerodigestive_Tract											1247.35	796.033	1	1	1	0.442186	Predicted resistant	52	6	91	16	148	181	953	19	130	28	796	148	269	71	100	3188	47	475	333	2	218	584	53	109	375	60
EB2_HAEMATOPOIETIC_AND_LYMPHOID_TISSUE	EB2	haematopoietic_and_lymphoid_tissue	lymphoid_neoplasm	Burkitt_lymphoma		Lymphoma:NH_B_cell	0.05	22.952	Resistant							Resistant	1249.24	513.114	1	1	1	0.203314	Predicted resistant	57	14	593	584	144	440	1357	1434	119	14	514	522	864	124	162	959	30	638	1532	5	255	93	73	14	455	74
LOXIMVI_SKIN	LOXIMVI	skin	malignant_melanoma			Skin:Melanoma	0.05	49.4773	Resistant				0.0001	21.6512	Resistant	Resistant	2438.62	947.042	1	1	1	0.121991	Predicted resistant	279	8	632	62	182	129	1829	470	85	23	948	15	2592	165	115	1038	4	779	576	4	153	12	34	6228	263	66
HS944T_SKIN	HS944T	skin	malignant_melanoma			Skin:Melanoma	0.000682013	65.1457	Intermediate							Intermediate	1256.98	376.147	1	0	0	0.146874	Predicted resistant	266	4	584	48	193	273	1090	215	63	35	377	737	400	150	31	955	22	516	234	5	106	720	31	10345	349	68
LS411N_LARGE_INTESTINE	LS411N	large_intestine	carcinoma	adenocarcinoma		Colorectal:Carcinoma	0.000541267	52.2794	Intermediate	10	24	Resistant				Intermediate	984.966	423.514	1	0	0	0.294731	Predicted resistant	53	7	236	35	128	403	1112	89	72	22	424	22	498	138	34	699	17	448	122	5	158	3	37	89	277	59
OE19_OESOPHAGUS	OE19	oesophagus	carcinoma	adenocarcinoma		Oesophagus:Carcinoma	0.000112338	95.8821	Sensitive							Sensitive	1265.15	393.889	1	0	0	0.751798	Predicted sensitive	141	28	351	5	449	1103	862	79	72	34	394	49	264	145	52	848	8	1084	15	16	120	3	26	520	223	92
KYSE150_OESOPHAGUS	KYSE150	oesophagus	carcinoma	squamous_cell_carcinoma		Oesophagus:Carcinoma	0.05	-7.45436	Resistant							Resistant	1064.02	318.273	1	0	0	0.114897	Predicted resistant	136	490	214	49	278	344	1298	136	106	41	319	521	362	205	180	6010	20	578	409	23	182	499	31	528	595	121
ONCODG1_OVARY	ONCODG1	ovary	carcinoma	adenocarcinoma		Ovary:Carcinoma	0.05	13.7346	Resistant							Resistant	1272.16	507.292	1	1	1	0.21177	Predicted resistant	75	15	67	37	358	463	638	9	176	28	508	654	456	192	61	2298	56	450	150	8	161	380	68	1916	333	42
NCIH2347_LUNG	NCIH2347	lung	carcinoma	adenocarcinoma		Lung:NSCLC_Adeno							0.0001	26.1993	Resistant	Resistant	2356.22	397.261	1	0	0	0.0645696	Predicted resistant	90	23	159	6	355	724	1879	516	43	35	398	194	3331	61	46	2389	137	895	1252	20	123	264	30	580	889	34
WM2664_SKIN	WM2664	skin	malignant_melanoma			Skin:Melanoma	0.05	38.5759	Resistant							Resistant	1273.42	561.718	1	1	1	0.265956	Predicted resistant	173	3	663	92	101	207	1277	16	57	21	562	12	608	128	87	1129	2	553	387	12	99	11	14	734	233	90
NCIH1838_LUNG	NCIH1838	lung	carcinoma	non_small_cell_carcinoma		Lung:NSCLC_Others											1273.67	383.656	1	0	0	0.166525	Predicted resistant	164	105	203	17	502	340	3682	1608	63	20	384	2	970	87	27	2120	52	990	532	6	118	2	25	1938	1150	68
T24_URINARY_TRACT	T24	urinary_tract	carcinoma	transitional_cell_carcinoma		Bladder	0.05	38.5907	Resistant				0.0001	9.16296	Resistant	Resistant	751.105	405.54	0	0	0	0.104728	Predicted resistant	171	21	357	72	615	408	1623	29	83	19	406	275	402	159	57	1106	69	1275	292	4	97	244	28	1664	688	80
HMCB_SKIN	HMCB	skin	malignant_melanoma			Skin:Melanoma	0.05	13.1522	Resistant							Resistant	1274.83	82.5124	1	0	0	0.0843373	Predicted resistant	115	17	151	61	113	442	765	2	56	7	83	108	142	245	49	2215	28	556	13	7	98	16	46	3	393	70
DV90_LUNG	DV90	lung	carcinoma	adenocarcinoma		Lung:NSCLC_Adeno	0.05	26.7215	Resistant							Resistant	2712.89	381.751	1	0	0	0.524202	Predicted sensitive	173	15	341	106	331	449	533	1	52	25	382	289	494	176	59	214	59	556	1021	6	150	4	67	1960	149	49
LCLC97TM1_LUNG	LCLC97TM1	lung	carcinoma	large_cell_carcinoma		Lung:NSCLC_Large_Cell	0.000174486	92.6339	Sensitive							Sensitive	3017.28	1014.62	1	1	1	0.78984	Predicted sensitive	53	8	105	27	119	384	1382	603	123	74	1015	10	776	212	105	3109	59	468	259	1	165	492	26	2512	343	52
JHH2_LIVER	JHH2	liver	carcinoma	hepatocellular_carcinoma		Liver:HCC	0.05	6.00683	Resistant							Resistant	1278.77	654.604	1	1	1	0.0643633	Predicted resistant	118	30	467	31	265	337	1473	244	114	25	655	403	576	210	156	1923	11	799	434	11	79	11	14	6478	537	101
FUOV1_OVARY	FUOV1	ovary	carcinoma	serous_carcinoma		Ovary:Carcinoma	0.05	29.7501	Resistant	10	0	Resistant				Resistant	968.33	411.364	1	0	0	0.18751	Predicted resistant	119	25	129	48	364	186	2127	622	89	21	412	522	407	85	43	983	58	822	324	7	143	320	23	15	973	78
NCIH650_LUNG	NCIH650	lung	carcinoma	bronchioloalveolar_adenocarcinoma		Lung:NSCLC_Adeno	0.05	15.879	Resistant				3.84559e-06	79.5789	Sensitive	Intermediate	2217.76	1420.14	1	1	1	0.411847	Predicted resistant	39	3	259	38	182	475	3063	3013	109	39	1420	453	2523	215	203	6881	24	403	84	14	203	330	20	2670	683	64
KYSE410_OESOPHAGUS	KYSE410	oesophagus	carcinoma	squamous_cell_carcinoma		Oesophagus:Carcinoma	0.05	-8.35076	Resistant				0.0001	9.29654	Resistant	Resistant	377.281	275.491	0	0	0	0.117132	Predicted resistant	46	50	122	57	230	600	4661	110	51	24	276	452	258	141	21	4644	70	2500	248	3	115	433	34	73	358	52
HLE_LIVER	HLE	liver	carcinoma	hepatocellular_carcinoma		Liver:HCC											1291.5	1264.4	1	1	1	0.127002	Predicted resistant	48	5	218	13	200	185	1983	202	110	30	1264	370	1593	165	116	612	40	328	212	25	218	101	80	63	380	42
KIJK_HAEMATOPOIETIC_AND_LYMPHOID_TISSUE	KIJK	haematopoietic_and_lymphoid_tissue	lymphoid_neoplasm	anaplastic_large_cell_lymphoma		Lymphoma:NH_T_cell	0.000283434	67.8108	Intermediate							Intermediate	1300.29	1332.28	1	1	1	0.192485	Predicted resistant	112	35	584	43	122	10	1923	423	116	5	1332	100	901	216	27	60	33	276	500	26	139	534	36	90	221	46
MCAS_OVARY	MCAS	ovary	carcinoma	adenocarcinoma		Ovary:Carcinoma	0.05	30.9096	Resistant							Resistant	598.205	792.333	0	1	0	0.341948	Predicted resistant	103	2	88	13	513	926	953	1060	175	43	793	42	1306	207	40	538	143	625	156	11	112	377	31	6330	458	56
GCT_SOFT_TISSUE	GCT	soft_tissue	malignant_fibrous_histiocytoma-pleomorphic_sarcoma			Soft_Tissue:Sarcoma_FibrousHistiocytoma	0.000217023	65.6969	Intermediate							Intermediate	1300.16	392.97	1	0	0	0.278818	Predicted resistant	130	3	244	29	142	403	2619	298	50	19	393	350	724	155	73	840	30	775	36	8	75	447	13	10652	585	77
OV7_OVARY	OV7	ovary	carcinoma			Ovary:Carcinoma	0.05	-10.4006	Resistant							Resistant	663.631	719.875	0	1	0	0.0924383	Predicted resistant	62	3	101	14	577	257	1937	1007	42	7	720	1653	562	152	55	5052	70	551	351	8	61	1	52	5132	327	37
SNU8_OVARY	SNU8	ovary	carcinoma	adenocarcinoma		Ovary:Carcinoma											1007.82	690.519	1	1	1	0.135415	Predicted resistant	110	21	107	13	316	554	1225	576	62	62	691	1255	1132	173	81	762	105	394	687	3	133	1	59	14348	466	56
EOL1CELL_HAEMATOPOIETIC_AND_LYMPHOID_TISSUE	EOL1CELL	haematopoietic_and_lymphoid_tissue	haematopoietic_neoplasm	chronic_eosinophilic_leukaemia-hypereosinophilic_syndrome		Leukemia:CML											1319.66	415.285	1	0	0	0.451	Predicted resistant	23	5	331	1512	93	497	1344	5	109	45	416	5	598	368	387	1896	34	307	109	5	356	3	67	251	224	87
NIHOVCAR3_OVARY	NIHOVCAR3	ovary	carcinoma			Ovary:Carcinoma				0.0116	87	Sensitive				Sensitive	1222.94	494.682	1	0	0	0.586183	Predicted sensitive	108	18	50	25	364	1191	524	1	164	25	495	981	258	134	22	1000	80	496	112	18	177	306	67	284	476	41
SNUC5_LARGE_INTESTINE	SNUC5	large_intestine	carcinoma	adenocarcinoma		Colorectal:Carcinoma	0.00230385	98.8646	Sensitive	0.005	69	Intermediate				Sensitive	2901.07	549.638	1	1	1	0.545864	Predicted sensitive	102	3	142	34	702	535	1480	465	114	34	550	391	1507	244	155	1945	145	476	834	14	356	8	47	197	322	59
NB1_AUTONOMIC_GANGLIA	NB1	autonomic_ganglia	neuroblastoma			CNS:Neuroblastoma	0.05	4.66583	Resistant							Resistant	1324.85	170.475	1	0	0	0.0931007	Predicted resistant	172	12	183	269	106	340	587	3	103	9	171	23	298	180	103	210	49	226	38	13	174	15	84	4	307	123
TOV21G_OVARY	TOV21G	ovary	carcinoma	clear_cell_carcinoma		Ovary:Carcinoma	0.05	33.0014	Resistant	0.046	55	Intermediate				Intermediate	1844.64	718.908	1	1	1	0.243124	Predicted resistant	66	3	631	93	483	315	2310	534	170	29	719	38	1042	184	111	1115	50	622	1880	9	109	2562	27	952	194	72
HEYA8_OVARY	HEYA8	ovary	carcinoma			Ovary:Carcinoma	0.00185106	54.5436	Intermediate	10	30	Resistant				Intermediate	1613.59	498.64	1	0	0	0.367504	Predicted resistant	119	19	929	30	302	424	2167	441	42	16	499	8	642	111	63	130	92	1101	836	19	147	636	9	5287	517	29
TE159T_SOFT_TISSUE	TE159T	soft_tissue	rhabdomyosarcoma			Soft_Tissue:Sarcoma_Rhabdoid											1331.21	130.352	1	0	0	0.0240453	Predicted resistant	131	30	29	58	290	221	2960	42	98	24	131	97	517	145	160	8162	4	528	3347	14	98	14	58	366	188	49
WM983B_SKIN	WM983B	skin	malignant_melanoma			Skin:Melanoma	0.05	-7.10664	Resistant							Resistant	1863.79	357.661	1	0	0	0.146671	Predicted resistant	27	2	125	181	96	226	1	1	61	23	358	500	535	155	67	2336	17	296	123	14	151	10	84	5777	446	30
RH41_SOFT_TISSUE	RH41	soft_tissue	rhabdomyosarcoma	alveolar		Soft_Tissue:Sarcoma_Rhabdoid	0.05	-6.99359	Resistant							Resistant	1567.03	85.6201	1	0	0	0.425153	Predicted resistant	69	11	299	178	66	319	853	5	216	18	86	358	18	503	37	311	20	182	16	3	137	120	36	24	275	92
AM38_CENTRAL_NERVOUS_SYSTEM	AM38	central_nervous_system	glioma	astrocytoma_Grade_IV	glioblastoma_multiforme	CNS:Glioma_HighGrade											1335.92	511.098	1	1	1	0.290284	Predicted resistant	172	17	671	62	241	324	6205	34	51	8	511	29	714	179	94	192	42	787	995	21	176	623	25	8055	395	39
OVCAR8_OVARY	OVCAR8	ovary	carcinoma			Ovary:Carcinoma	0.05	-5.48709	Resistant	10	0	Resistant				Resistant	783.403	333.306	0	0	0	0.0258371	Predicted resistant	20	3	200	42	210	407	1808	20	121	38	334	1304	1035	156	207	1259	110	267	172	18	77	376	79	85	328	46
OVK18_OVARY	OVK18	ovary	carcinoma	endometrioid_carcinoma		Ovary:Carcinoma											2109.24	360.221	1	0	0	0.233693	Predicted resistant	175	4	164	10	96	265	1115	130	170	25	361	41	423	135	105	1846	37	404	34	5	115	1	41	14	247	76
EN_ENDOMETRIUM	EN	endometrium	carcinoma			Endometrium:Carcinoma	0.05	33.6621	Resistant							Resistant	1340.75	245.203	1	0	0	0.0426071	Predicted resistant	31	18	117	43	121	186	693	6	179	26	246	444	360	63	41	3592	66	418	278	11	119	675	37	13	553	84
TO175T_HAEMATOPOIETIC_AND_LYMPHOID_TISSUE	TO175T	haematopoietic_and_lymphoid_tissue	lymphoid_neoplasm	Hodgkin_lymphoma		Lymphoma:Hodgkin											1342.58	190.18	1	0	0	0.0564637	Predicted resistant	148	64	144	15	271	231	2184	1	76	17	191	72	352	114	82	11766	30	484	1358	27	116	22	46	1198	198	72
SKNDZ_AUTONOMIC_GANGLIA	SKNDZ	autonomic_ganglia	neuroblastoma			CNS:Neuroblastoma	0.05	-6.93506	Resistant							Resistant	235.705	14.3232	0	0	0	0.0550304	Predicted resistant	143	23	117	147	124	1006	453	12	126	19	15	123	46	140	51	837	19	354	11	13	113	4	73	12	199	78
F36P_HAEMATOPOIETIC_AND_LYMPHOID_TISSUE	F36P	haematopoietic_and_lymphoid_tissue	haematopoietic_neoplasm	acute_myeloid_leukaemia	M6	Leukemia:AML											1346.39	708.376	1	1	1	0.184539	Predicted resistant	75	3	117	463	309	401	1120	23	436	213	709	8	2114	192	392	331	5	120	7	5	257	126	94	374	248	144
OCIAML5_HAEMATOPOIETIC_AND_LYMPHOID_TISSUE	OCIAML5	haematopoietic_and_lymphoid_tissue	haematopoietic_neoplasm	acute_myeloid_leukaemia	M4	Leukemia:AML	0.05	5.87505	Resistant							Resistant	1350.57	346.738	1	0	0	0.659851	Predicted sensitive	65	2	254	1214	107	701	1056	9	63	29	347	107	437	144	192	130	10	375	161	11	156	476	36	4386	190	139
CGTHW1_THYROID	CGTHW1	thyroid	carcinoma	follicular_carcinoma		Thyroid											1350.52	465.49	1	0	0	0.216632	Predicted resistant	92	3	136	63	112	246	2133	6	133	9	466	11	383	136	155	240	42	911	42	12	161	694	19	2193	505	59
2313287_STOMACH	2313287	stomach	carcinoma	adenocarcinoma		Gastric:Carcinoma				0.056	55	Intermediate				Intermediate	3270.07	909.222	1	1	1	0.639678	Predicted sensitive	59	16	281	27	436	167	1588	449	79	13	909	112	594	288	54	531	64	459	268	10	184	5	45	6869	379	80
HS695T_SKIN	HS695T	skin	malignant_melanoma			Skin:Melanoma	0.000138624	62.6989	Intermediate							Intermediate	1354.89	439.959	1	0	0	0.340465	Predicted resistant	149	23	314	55	147	148	1880	29	70	19	440	22	184	80	77	2268	22	606	259	14	58	1057	20	206	368	120
HCC1359_LUNG	HCC1359	lung	carcinoma	large_cell_carcinoma		Lung:NSCLC_Large_Cell											1357.57	1222.17	1	1	1	0.101151	Predicted resistant	37	5	113	36	166	174	1747	810	78	17	1222	1	1783	352	77	1000	55	290	373	6	160	557	69	6483	380	4
KARPAS422_HAEMATOPOIETIC_AND_LYMPHOID_TISSUE	KARPAS422	haematopoietic_and_lymphoid_tissue	lymphoid_neoplasm	diffuse_large_B_cell_lymphoma		Lymphoma:NH_B_cell	0.05	45.7966	Resistant							Resistant	1377.55	613.911	1	1	1	0.30649	Predicted resistant	57	3	297	5	69	292	2348	75	42	17	614	63	735	134	133	702	33	256	631	7	207	26	50	31	335	149
SW1710_URINARY_TRACT	SW1710	urinary_tract	carcinoma	transitional_cell_carcinoma		Bladder											1379.79	542.484	1	1	1	0.279184	Predicted resistant	53	2	92	612	285	535	859	161	165	32	543	9	851	190	172	373	60	479	240	18	186	2599	33	283	198	69
OV56_OVARY	OV56	ovary	carcinoma			Ovary:Carcinoma	0.000471604	92.5322	Sensitive	10	30	Resistant	0.0001	13.6195	Resistant	Resistant	4316.19	483.284	1	0	0	0.0955889	Predicted resistant	57	19	88	43	415	317	2694	6054	70	28	484	1189	5458	74	187	2276	38	317	614	25	244	612	28	5334	971	10
HPAC_PANCREAS	HPAC	pancreas	carcinoma	ductal_carcinoma		Pancreas											1025.05	951.533	1	1	1	0.599848	Predicted sensitive	16	15	172	26	403	452	2377	1269	151	29	952	138	479	93	36	526	197	354	476	9	289	28	42	114	243	74
MV411_HAEMATOPOIETIC_AND_LYMPHOID_TISSUE	MV411	haematopoietic_and_lymphoid_tissue	haematopoietic_neoplasm	acute_myeloid_leukaemia	M5	Leukemia:AML	0.00150496	57.4753	Intermediate				0.0001	26.9795	Resistant	Intermediate	1833.58	275.056	1	0	0	0.235389	Predicted resistant	136	5	1555	1550	93	623	469	3	70	39	276	287	860	223	203	419	5	442	92	1	248	5	48	89	165	210
HT1376_URINARY_TRACT	HT1376	urinary_tract	carcinoma	transitional_cell_carcinoma		Bladder	0.05	-6.86433	Resistant				0.0001	3.52234	Resistant	Resistant	397.744	413.796	0	0	0	0.0122744	Predicted resistant	72	44	98	52	254	105	1278	302	38	20	414	313	708	114	98	529	76	560	170	14	99	9	18	29	383	81
CHP126_AUTONOMIC_GANGLIA	CHP126	autonomic_ganglia	neuroblastoma			CNS:Neuroblastoma											1405.06	4.5547	1	0	0	0.196696	Predicted resistant	110	15	190	1161	110	447	407	9	238	2	5	32	21	691	245	188	2	236	3	8	345	152	86	8	125	121
C32_SKIN	C32	skin	malignant_melanoma			Skin:Melanoma	0.05	46.289	Resistant							Resistant	1411.46	996.218	1	1	1	0.333572	Predicted resistant	97	19	291	72	81	128	3516	10	89	7	997	9	516	187	137	3145	30	236	551	19	193	9	53	236	199	62
SNU213_PANCREAS	SNU213	pancreas	carcinoma			Pancreas											1804.02	1064.09	1	1	1	0.414779	Predicted resistant	108	34	118	11	392	633	2384	1896	95	54	1064	625	1535	77	41	727	113	734	518	19	208	307	26	3856	938	84
PF382_HAEMATOPOIETIC_AND_LYMPHOID_TISSUE	PF382	haematopoietic_and_lymphoid_tissue	lymphoid_neoplasm	acute_lymphoblastic_T_cell_leukaemia		Leukemia:ALL	0.05	30.5294	Resistant	10	0	Resistant				Resistant	156.202	786.262	0	1	0	0.0486269	Predicted resistant	35	3	76	340	260	157	1125	255	138	63	787	3	410	242	240	1867	35	347	163	25	322	5	61	4	289	111
HCC1569_BREAST	HCC1569	breast	carcinoma	metaplastic_carcinoma		Breast:Carcinoma	0.00019098	64.9056	Intermediate	10	33.55	Resistant				Intermediate	829.208	125.521	0	0	0	0.0128829	Predicted resistant	46	31	195	37	175	649	1416	16	66	1	126	818	746	88	89	6121	52	461	74	12	168	64	32	49	500	44
OCILY19_HAEMATOPOIETIC_AND_LYMPHOID_TISSUE	OCILY19	haematopoietic_and_lymphoid_tissue	lymphoid_neoplasm	diffuse_large_B_cell_lymphoma		Lymphoma:NH_B_cell	9.31605e-05	95.1646	Sensitive							Sensitive	1416.29	850.931	1	1	1	0.636846	Predicted sensitive	103	6	252	1987	184	329	516	21	135	61	851	16	414	197	131	2021	27	301	96	12	344	754	23	14	267	193
UBLC1_URINARY_TRACT	UBLC1	urinary_tract	carcinoma	transitional_cell_carcinoma		Bladder											1420.57	184.209	1	0	0	0.0608554	Predicted resistant	59	26	119	26	280	439	1474	168	99	27	185	351	1770	127	113	146	111	340	52	16	119	1010	63	1348	400	70
PANC0213_PANCREAS	PANC0213	pancreas	carcinoma			Pancreas											1937.77	465.848	1	0	0	0.401226	Predicted resistant	19	22	83	18	322	497	2153	3822	51	55	466	12	1387	118	244	1237	65	561	309	9	101	520	44	11178	571	96
NCIN87_STOMACH	NCIN87	stomach	carcinoma			Gastric:Carcinoma							0.0001	2.64513	Resistant	Resistant	507.718	548.415	0	1	0	0.150416	Predicted resistant	74	3	367	29	383	852	1160	239	80	14	549	694	777	290	110	5204	66	688	278	11	226	15	39	64	225	77
PK1_PANCREAS	PK1	pancreas	carcinoma			Pancreas				10	0	Resistant				Resistant	0.9389	750.265	0	1	0	0.0471711	Predicted resistant	222	39	144	32	519	638	1054	64	84	25	750	3	390	79	29	2288	45	1005	666	14	118	4	4	103	757	96
KU1919_URINARY_TRACT	KU1919	urinary_tract	carcinoma	transitional_cell_carcinoma		Bladder											1429.95	738.888	1	1	1	0.555274	Predicted sensitive	51	8	229	25	175	335	430	21	101	38	739	13	426	137	90	1264	30	2705	121	14	302	296	28	27	626	7
NCIH2085_LUNG	NCIH2085	lung	carcinoma	adenocarcinoma		Lung:NSCLC_Adeno											1434.19	282.268	1	0	0	0.534556	Predicted sensitive	39	21	129	26	315	890	3670	674	59	25	283	347	1320	82	71	636	168	461	17	7	71	134	17	126	732	53
HS766T_PANCREAS	HS766T	pancreas	carcinoma	ductal_carcinoma		Pancreas	0.05	17.73	Resistant				0.0001	11.9394	Resistant	Resistant	953.82	623.491	0	1	0	0.337182	Predicted resistant	68	5	309	19	997	506	1357	115	120	24	624	403	851	71	67	164	79	1070	466	14	87	273	44	119	701	128
HLF_LIVER	HLF	liver	carcinoma	hepatocellular_carcinoma		Liver:HCC											1437.03	1178.37	1	1	1	0.0486965	Predicted resistant	142	11	345	27	322	82	2280	658	49	20	1179	244	2553	146	30	529	50	744	111	21	168	110	31	49	471	38
RL952_ENDOMETRIUM	RL952	endometrium	carcinoma	mixed_adenosquamous_carcinoma		Endometrium:Carcinoma											1439.57	273.187	1	0	0	0.320477	Predicted resistant	35	50	156	54	224	716	1750	121	105	5	274	406	374	135	57	3931	81	498	432	5	139	1160	44	20	288	80
NCIH1563_LUNG	NCIH1563	lung	carcinoma	adenocarcinoma		Lung:NSCLC_Adeno	0.05	46.6097	Resistant							Resistant	1440.15	799.626	1	1	1	0.198394	Predicted resistant	86	3	235	96	388	164	814	17	81	14	800	2	805	217	56	4527	29	687	247	16	181	14	12	71	352	61
MALME3M_SKIN	MALME3M	skin	malignant_melanoma			Skin:Melanoma							0.0001	1.16346	Resistant	Resistant	1440.89	576.701	1	1	1	0.377073	Predicted resistant	109	3	267	114	140	298	694	36	54	33	577	11	478	187	34	1052	70	475	194	20	97	5	60	119	347	68
OE33_OESOPHAGUS	OE33	oesophagus	other	metaplasia		Oesophagus:Benign	0.000209296	86.7327	Sensitive							Sensitive	1445.27	1027.91	1	1	1	0.596782	Predicted sensitive	19	6	48	7	392	980	1891	1073	104	28	1028	605	1802	185	56	861	211	594	588	16	181	3	27	1406	1003	58
CAPAN2_PANCREAS	CAPAN2	pancreas	carcinoma	ductal_carcinoma		Pancreas				10	0	Resistant				Resistant	481.035	815.205	0	1	0	0.0947084	Predicted resistant	54	12	317	18	367	391	2991	2408	60	23	816	695	2294	89	46	513	68	1007	842	5	131	5	23	560	907	59
A253_SALIVARY_GLAND	A253	salivary_gland	carcinoma	mucoepidermoid_carcinoma		Salivary_Gland	0.05	47.246	Resistant							Resistant	1452.34	635.122	1	1	1	0.256571	Predicted resistant	26	5	216	42	164	363	954	24	86	51	635	226	244	217	43	1744	46	1244	149	20	334	317	62	194	342	25
HS751T_HAEMATOPOIETIC_AND_LYMPHOID_TISSUE	HS751T	haematopoietic_and_lymphoid_tissue	lymphoid_neoplasm	Hodgkin_lymphoma		Lymphoma:Hodgkin											1466.54	229.66	1	0	0	0.0218079	Predicted resistant	71	7	203	50	147	250	2229	43	105	11	230	57	518	135	110	3960	37	267	1290	13	215	3	66	56	241	53
RPMI8402_HAEMATOPOIETIC_AND_LYMPHOID_TISSUE	RPMI8402	haematopoietic_and_lymphoid_tissue	lymphoid_neoplasm	acute_lymphoblastic_T_cell_leukaemia		Leukemia:ALL	0.05	-6.77425	Resistant	10	0	Resistant				Resistant	378.696	727.49	0	1	0	0.0674233	Predicted resistant	50	6	158	160	116	264	708	128	145	133	728	18	1403	296	86	57	31	191	27	13	321	89	56	22	383	121
JHOM1_OVARY	JHOM1	ovary	carcinoma	adenocarcinoma		Ovary:Carcinoma	0.00019982	74.3083	Sensitive							Sensitive	1472.23	360.831	1	0	0	0.39696	Predicted resistant	84	22	120	36	239	288	2114	246	75	11	361	2	530	265	159	151	33	2112	333	6	94	107	20	192	581	39
HDQP1_BREAST	HDQP1	breast	carcinoma	ductal_carcinoma		Breast:Carcinoma	0.05	-6.72518	Resistant							Resistant	593.682	511.284	0	1	0	0.240403	Predicted resistant	11	62	97	27	361	295	1395	238	101	47	512	1170	212	216	144	864	95	1542	237	13	108	349	42	152	370	82
HT1197_URINARY_TRACT	HT1197	urinary_tract	carcinoma			Bladder											1473.91	526.364	1	1	1	0.113955	Predicted resistant	60	7	420	3	339	141	1736	45	80	43	527	136	1190	115	21	189	153	573	465	22	158	62	57	55	989	66
MFE319_ENDOMETRIUM	MFE319	endometrium	carcinoma	adenocarcinoma		Endometrium:Carcinoma											1478.74	104.557	1	0	0	0.0164827	Predicted resistant	59	104	326	74	337	359	1828	185	74	27	105	373	654	158	75	5259	82	424	1441	28	109	141	41	1649	300	87
SNU1041_UPPER_AERODIGESTIVE_TRACT	SNU1041	upper_aerodigestive_tract	carcinoma			Upper_Aerodigestive_Tract											1480.39	436.797	1	0	0	0.222274	Predicted resistant	37	27	97	11	469	237	7016	1245	121	21	437	10	485	172	61	5042	103	2564	219	16	222	477	42	3487	1026	40
SNU1079_BILIARY_TRACT	SNU1079	biliary_tract	carcinoma			Biliary_Tract	0.000267935	68.3811	Intermediate							Intermediate	1480.74	873.938	1	1	1	0.341307	Predicted resistant	37	57	238	101	718	249	2491	398	129	32	874	16	945	250	185	1639	54	178	421	13	100	6	24	556	263	89
KCL22_HAEMATOPOIETIC_AND_LYMPHOID_TISSUE	KCL22	haematopoietic_and_lymphoid_tissue	haematopoietic_neoplasm	blast_phase_chronic_myeloid_leukaemia		Leukemia:CML	0.05	-6.70939	Resistant							Resistant	257.878	1151.24	0	1	0	0.30312	Predicted resistant	79	27	151	946	112	529	675	29	87	83	1151	61	519	201	103	302	31	294	9	10	174	654	29	29	313	145
OC316_OVARY	OC316	ovary	carcinoma	adenocarcinoma		Ovary:Carcinoma	0.05	27.0116	Resistant							Resistant	1481.84	731.734	1	1	1	0.139219	Predicted resistant	92	19	158	28	205	306	3879	1338	75	16	732	609	1309	106	44	1083	67	726	272	1	35	870	46	333	292	44
HS840T_UPPER_AERODIGESTIVE_TRACT	HS840T	upper_aerodigestive_tract	other	papilloma		Upper_Aerodigestive_Tract											1483.22	263.071	1	0	0	0.169429	Predicted resistant	235	10	298	22	175	560	2971	77	79	10	263	209	465	136	143	4313	19	686	930	10	56	250	26	649	281	49
HPAFII_PANCREAS	HPAFII	pancreas	carcinoma	ductal_carcinoma		Pancreas	0.05	20.6602	Resistant				0.0001	14.1736	Resistant	Resistant	801.436	1142.08	0	1	0	0.110775	Predicted resistant	51	16	234	24	700	380	1175	844	50	79	1143	1404	1277	165	39	7031	100	678	91	10	112	6	40	586	1410	140
DANG_PANCREAS	DANG	pancreas	carcinoma			Pancreas	0.05	20.2556	Resistant	10	12	Resistant				Resistant	388.14	1588.07	0	1	0	0.291601	Predicted resistant	96	22	112	22	239	337	1173	95	96	42	1589	2	945	124	17	225	55	1103	394	13	348	462	20	32	959	62
LOUNH91_LUNG	LOUNH91	lung	carcinoma	squamous_cell_carcinoma		Lung:NSCLC_Squamous				10	0	Resistant				Resistant	1496.81	541.624	1	1	1	0.464145	Predicted resistant	112	3	383	17	397	514	1588	33	111	22	542	10	689	116	221	819	48	588	194	6	45	698	69	41	320	56
A673_BONE	A673	bone	Ewings_sarcoma-peripheral_primitive_neuroectodermal_tumour			Bone:Sarcoma_Ewing	0.00010797	80.888	Sensitive							Sensitive	1502.96	249.628	1	0	0	0.0941258	Predicted resistant	95	5	195	297	135	437	1015	18	121	8	250	7	682	241	44	3667	25	900	495	2	155	252	44	61	342	215
HS611T_HAEMATOPOIETIC_AND_LYMPHOID_TISSUE	HS611T	haematopoietic_and_lymphoid_tissue	lymphoid_neoplasm	Hodgkin_lymphoma		Lymphoma:Hodgkin	0.05	-6.60943	Resistant							Resistant	2032.21	141.052	1	0	0	0.0749425	Predicted resistant	105	9	645	327	178	783	1748	3507	65	9	142	42	2716	106	87	367	76	609	1732	14	495	18	28	1496	289	37
DM3_PLEURA	DM3	pleura	mesothelioma			Lung:Mesothelioma											1507.33	286.959	1	0	0	0.0792559	Predicted resistant	205	22	190	9	534	410	1932	62	113	7	287	327	493	155	337	5200	22	534	1323	5	107	4	42	110	218	66
MEWO_SKIN	MEWO	skin	malignant_melanoma			Skin:Melanoma	0.05	3.08457	Resistant							Resistant	1510.14	317.385	1	0	0	0.32677	Predicted resistant	29	4	144	278	98	246	665	1	94	7	318	72	295	174	119	3786	23	1185	9	16	131	3	32	428	259	78
HCC15_LUNG	HCC15	lung	carcinoma	squamous_cell_carcinoma		Lung:NSCLC_Squamous	0.05	-6.55662	Resistant				5.81796e-06	78.4849	Sensitive	Intermediate	534.243	760.724	0	1	0	0.349654	Predicted resistant	79	4	162	18	375	564	1335	147	119	50	761	3	708	173	77	144	117	818	415	13	40	23	58	1876	360	152
HS600T_SKIN	HS600T	skin	malignant_melanoma			Skin:Melanoma											1517.41	220.095	1	0	0	0.0628186	Predicted resistant	219	35	176	20	239	250	2404	68	66	25	221	109	387	112	105	6469	6	647	2025	12	143	3	38	4561	195	55
HS675T_LARGE_INTESTINE	HS675T	large_intestine	carcinoma			Colorectal:Carcinoma				10	29	Resistant				Resistant	2208.32	158.641	1	0	0	0.120916	Predicted resistant	169	10	437	55	274	426	1782	74	166	3	159	46	794	140	77	3192	16	547	1841	14	150	4	15	6434	190	41
OPM2_HAEMATOPOIETIC_AND_LYMPHOID_TISSUE	OPM2	haematopoietic_and_lymphoid_tissue	lymphoid_neoplasm	plasma_cell_myeloma		Lymphoma:Multiple_Myeloma							5.31216e-06	78.9896	Sensitive	Sensitive	1534.66	1836.61	1	1	1	0.23203	Predicted resistant	97	24	129	529	82	66	1210	26	114	175	1837	350	1189	135	244	25	36	427	77	10	839	70	49	12	448	65
HSC3_UPPER_AERODIGESTIVE_TRACT	HSC3	upper_aerodigestive_tract	carcinoma	squamous_cell_carcinoma		Upper_Aerodigestive_Tract							0.0001	5.68878	Resistant	Resistant	1535.99	260.177	1	0	0	0.198213	Predicted resistant	100	10	144	33	140	598	2805	196	83	9	261	93	451	117	71	1417	82	1790	840	13	117	5	17	9473	960	25
KP4_PANCREAS	KP4	pancreas	carcinoma	ductal_carcinoma		Pancreas				10	7	Resistant				Resistant	998.006	437.542	1	0	0	0.0399783	Predicted resistant	78	5	164	11	111	413	1747	414	152	3	438	12	1093	335	135	7314	37	333	861	7	75	234	122	168	250	64
BECKER_CENTRAL_NERVOUS_SYSTEM	BECKER	central_nervous_system	glioma	astrocytoma_Grade_IV	glioblastoma_multiforme	CNS:Glioma_HighGrade											1542.39	517.225	1	1	1	0.170432	Predicted resistant	307	13	89	72	195	207	1884	5	46	7	518	1	658	150	111	1742	26	875	200	7	87	4	29	878	217	58
ACHN_KIDNEY	ACHN	kidney	carcinoma	renal_cell_carcinoma		Kidney:Carcinoma	0.000101435	90.816	Sensitive	0.07	58	Intermediate				Sensitive	2055.98	1182.12	1	1	1	0.367415	Predicted resistant	56	39	199	287	389	309	818	317	83	38	1183	3	2328	238	275	2071	73	588	1853	12	159	2440	32	718	144	42
SIMA_AUTONOMIC_GANGLIA	SIMA	autonomic_ganglia	neuroblastoma			CNS:Neuroblastoma											1566.01	2.143	1	0	0	0.0131454	Predicted resistant	144	6	242	369	121	263	586	8	230	12	3	32	115	489	200	7121	10	243	44	10	740	472	108	11	244	154
OSRC2_KIDNEY	OSRC2	kidney	carcinoma	renal_cell_carcinoma		Kidney:Carcinoma	0.05	-6.521	Resistant	10	22	Resistant				Resistant	2144.31	611.293	1	1	1	0.345989	Predicted resistant	86	6	477	106	610	518	2927	829	90	9	612	17	944	122	128	912	70	566	1222	14	132	1612	34	8482	392	48
QGP1_PANCREAS	QGP1	pancreas	carcinoma			Pancreas				10	11	Resistant				Resistant	392.512	57.3163	0	0	0	0.00323887	Predicted resistant	55	17	143	335	175	248	2064	123	108	13	58	191	346	117	293	1056	36	627	15	14	1044	307	54	38	216	86
SUIT2_PANCREAS	SUIT2	pancreas	carcinoma	ductal_carcinoma		Pancreas				10	13	Resistant	0.0001	1.08995	Resistant	Resistant	779.896	699.038	0	1	0	0.068547	Predicted resistant	29	5	139	36	314	608	1929	130	110	53	699	60	1106	307	178	2807	69	431	467	30	185	5	138	67	285	38
JK1_HAEMATOPOIETIC_AND_LYMPHOID_TISSUE	JK1	haematopoietic_and_lymphoid_tissue	haematopoietic_neoplasm	blast_phase_chronic_myeloid_leukaemia		Leukemia:CML											1578.78	552.525	1	1	1	0.165062	Predicted resistant	49	42	225	40	351	430	1565	74	355	113	553	17	1257	184	199	466	70	188	277	18	291	19	34	1129	393	124
HCC1954_BREAST	HCC1954	breast	carcinoma	ductal_carcinoma		Breast:Carcinoma	0.05	-6.30129	Resistant				0.0001	9.23828	Resistant	Resistant	251.613	440.568	0	0	0	0.0195072	Predicted resistant	59	40	348	11	149	323	3042	147	55	75	441	224	650	94	58	3888	73	1666	272	16	108	353	21	839	399	43
JHH1_LIVER	JHH1	liver	carcinoma	hepatocellular_carcinoma		Liver:HCC							8.97357e-05	56.6741	Intermediate	Intermediate	1599.71	392.292	1	0	0	0.171523	Predicted resistant	37	31	565	139	249	160	2053	5	104	16	393	288	627	118	41	5553	129	407	278	8	79	254	24	80	662	31
KP2_PANCREAS	KP2	pancreas	carcinoma			Pancreas				10	14	Resistant				Resistant	507.349	701.395	0	1	0	0.240158	Predicted resistant	53	22	229	11	429	536	1450	196	122	34	702	6	1175	136	58	440	22	581	122	13	109	412	66	30	388	114
CFPAC1_PANCREAS	CFPAC1	pancreas	carcinoma	ductal_carcinoma		Pancreas	0.05	-12.422	Resistant	10	20	Resistant				Resistant	1880.34	667.88	1	1	1	0.0928178	Predicted resistant	33	24	130	9	708	528	1544	1324	105	44	668	463	3549	127	67	875	152	759	310	17	222	327	34	5633	526	125
NCIH1648_LUNG	NCIH1648	lung	carcinoma	adenocarcinoma		Lung:NSCLC_Adeno											1622.09	397.863	1	0	0	0.139684	Predicted resistant	71	21	195	26	209	277	1879	4030	50	12	398	3	1105	78	31	1428	83	677	452	14	102	378	29	9169	1962	51
RS5_PLEURA	RS5	pleura	mesothelioma			Lung:Mesothelioma											1623.05	317.681	1	0	0	0.0911266	Predicted resistant	119	5	153	30	227	373	1926	15	117	39	318	120	872	145	172	4210	18	516	1951	8	173	24	34	96	280	63
HS606T_BREAST	HS606T	breast	carcinoma			Breast:Carcinoma				10	2.45	Resistant				Resistant	1631.45	373.819	1	0	0	0.100373	Predicted resistant	120	1	357	20	67	322	1859	92	82	12	374	110	591	132	148	1924	29	447	1507	10	174	21	26	5396	217	52
CAKI1_KIDNEY	CAKI1	kidney	carcinoma	clear_cell_renal_cell_carcinoma		Kidney:Carcinoma	0.000308703	87.4817	Sensitive	0.01	96	Sensitive	3.29545e-05	51.4368	Intermediate	Sensitive	2905.95	783.049	1	1	1	0.434969	Predicted resistant	77	16	314	41	271	594	1575	1384	75	56	783	3	2397	88	134	401	52	976	876	2	129	1747	57	12208	273	58
NUGC3_STOMACH	NUGC3	stomach	carcinoma			Gastric:Carcinoma	0.000436874	64.2881	Intermediate				0.0001	30.4588	Resistant	Intermediate	1895.52	802.147	1	1	1	0.332198	Predicted resistant	107	8	288	10	707	441	1569	612	81	60	803	189	3063	283	69	382	86	1113	145	4	97	584	19	5319	805	107
RPMI6666_HAEMATOPOIETIC_AND_LYMPHOID_TISSUE	RPMI6666	haematopoietic_and_lymphoid_tissue	lymphoid_neoplasm	Hodgkin_lymphoma		Lymphoma:Hodgkin											1643.84	508.235	1	1	1	0.106244	Predicted resistant	119	29	516	617	154	423	1341	1179	57	74	509	110	3073	117	248	63	36	454	2931	24	1004	85	51	50	165	70
MIAPACA2_PANCREAS	MIAPACA2	pancreas	carcinoma	ductal_carcinoma		Pancreas	0.000152112	83.69	Sensitive	0.0141	80	Sensitive	1.49221e-06	98.2005	Sensitive	Sensitive	891.138	992.819	0	1	0	0.477666	Predicted resistant	64	5	156	47	222	584	1381	143	118	30	993	9	1191	207	130	399	101	447	125	10	125	2	44	1946	339	76
OC315_OVARY	OC315	ovary	carcinoma	serous_carcinoma		Ovary:Carcinoma											1649.18	837.963	1	1	1	0.187551	Predicted resistant	96	69	228	34	201	359	4259	1660	97	4	838	681	1341	154	58	2350	49	571	195	3	43	748	63	1267	223	53
LCLC103H_LUNG	LCLC103H	lung	carcinoma	large_cell_carcinoma		Lung:NSCLC_Large_Cell	0.05	-6.28299	Resistant	10	22	Resistant				Resistant	1140.09	583.457	1	1	1	0.0735552	Predicted resistant	97	34	119	53	272	149	1267	236	106	35	584	11	1026	163	584	1072	65	430	156	11	125	100	32	26	1064	88
SKLMS1_SOFT_TISSUE	SKLMS1	soft_tissue	sarcoma			Soft_Tissue:Sarcoma_Others	0.05	-6.25205	Resistant				0.0001	2.61859	Resistant	Resistant	855.604	97.373	0	0	0	0.00932172	Predicted resistant	165	14	263	16	274	139	2033	95	92	6	98	132	419	122	170	2487	29	824	204	3	124	93	15	1220	359	89
H4_CENTRAL_NERVOUS_SYSTEM	H4	central_nervous_system	glioma			CNS:Glioma	5.98006e-05	96.3459	Sensitive							Sensitive	1662.67	424.517	1	0	0	0.421419	Predicted resistant	54	3	637	30	127	409	1340	55	106	11	425	7	268	155	107	1183	24	588	431	21	141	597	21	1908	359	55
OCIAML2_HAEMATOPOIETIC_AND_LYMPHOID_TISSUE	OCIAML2	haematopoietic_and_lymphoid_tissue	haematopoietic_neoplasm	acute_myeloid_leukaemia	M4	Leukemia:AML	0.05	35.0806	Resistant							Resistant	1662.86	453.697	1	0	0	0.672404	Predicted sensitive	54	7	400	1417	59	442	839	1	60	77	454	295	599	147	151	61	22	485	231	11	248	2	40	3100	200	130
BFTC905_URINARY_TRACT	BFTC905	urinary_tract	carcinoma	transitional_cell_carcinoma	papillary_transitional_cell_carcinoma	Bladder											2335.37	434.895	1	0	0	0.24128	Predicted resistant	60	79	132	48	266	386	801	71	177	30	449	17	799	220	64	4970	55	910	233	13	112	918	44	3278	433	51
PANC0327_PANCREAS	PANC0327	pancreas	carcinoma	ductal_carcinoma		Pancreas	8.39136e-05	94.1232	Sensitive				1.4171e-05	80.5014	Sensitive	Sensitive	1642.72	606.384	1	1	1	0.486467	Predicted resistant	58	3	155	21	303	1143	2133	1920	89	25	607	14	1330	131	61	1072	151	758	825	8	110	541	51	660	478	68
HS737T_BONE	HS737T	bone	other	giant_cell_tumour		Bone:Sarcoma_Giant_Cell											1669.96	113.497	1	0	0	0.0418104	Predicted resistant	219	7	163	21	246	365	1866	39	74	2	114	293	334	91	112	5453	31	750	1126	13	138	31	26	30	262	56
MELHO_SKIN	MELHO	skin	malignant_melanoma			Skin:Melanoma	9.04535e-05	80.1517	Sensitive							Sensitive	1672.22	814.956	1	1	1	0.742644	Predicted sensitive	83	6	293	138	158	197	564	5	38	26	815	36	374	151	23	229	57	1137	248	22	77	4	23	236	333	78
HT144_SKIN	HT144	skin	malignant_melanoma			Skin:Melanoma	0.00011022	75.0581	Sensitive							Sensitive	1674.84	595.347	1	1	1	0.687924	Predicted sensitive	165	5	305	71	107	268	2146	28	29	15	596	25	433	154	72	827	31	668	426	21	123	3	25	2880	362	51
MOGGUVW_CENTRAL_NERVOUS_SYSTEM	MOGGUVW	central_nervous_system	glioma	astrocytoma		CNS:Glioma	0.05	44.8236	Resistant							Resistant	1674.09	425.276	1	0	0	0.377608	Predicted resistant	76	12	116	7	136	628	1560	90	54	19	426	428	228	167	158	2938	48	661	210	18	179	70	34	486	496	80
HEPG2_LIVER	HEPG2	liver	carcinoma	hepatocellular_carcinoma		Liver:HCC							0.0001	21.6354	Resistant	Resistant	1675.58	348.82	1	0	0	0.276962	Predicted resistant	128	2	590	8	691	249	1168	20	133	69	349	29	1528	180	52	346	18	391	219	4	107	3	17	110	566	48
TE14_OESOPHAGUS	TE14	oesophagus	carcinoma	squamous_cell_carcinoma		Oesophagus:Carcinoma											1683.31	373.081	1	0	0	0.139202	Predicted resistant	58	36	168	42	204	326	1689	22	127	23	373	1	501	246	74	3800	33	2793	227	6	69	84	31	3517	298	65
NCIH1869_LUNG	NCIH1869	lung	carcinoma	squamous_cell_carcinoma		Lung:NSCLC_Squamous	0.05	25.2984	Resistant	0.034	60	Intermediate				Intermediate	331.697	803.209	0	1	0	0.0772053	Predicted resistant	80	9	86	12	416	406	1324	1206	59	83	803	21	1379	115	37	915	46	427	1302	13	144	124	39	1893	379	56
SW1990_PANCREAS	SW1990	pancreas	carcinoma	ductal_carcinoma		Pancreas	0.00117385	65.2026	Intermediate	0.02	79	Sensitive				Sensitive	2018.19	531.721	1	1	1	0.543788	Predicted sensitive	148	18	381	3	785	653	3272	726	41	14	532	14	749	82	35	224	139	1197	1187	14	62	311	21	1096	921	89
HS578T_BREAST	HS578T	breast	carcinoma	ductal_carcinoma		Breast:Carcinoma	0.05	-6.14442	Resistant	10	40.65	Resistant				Resistant	1415.11	249.342	1	0	0	0.0247793	Predicted resistant	107	21	279	2	238	218	3206	413	51	13	250	12	1667	105	69	5361	28	260	274	10	100	5	19	5066	687	47
SKMEL1_SKIN	SKMEL1	skin	malignant_melanoma			Skin:Melanoma	0.05	-5.84841	Resistant				1.81609e-05	58.5045	Intermediate	Intermediate	2297.21	145.961	1	0	0	0.0655903	Predicted resistant	234	18	130	83	234	236	1358	34	73	38	146	251	389	186	91	945	34	557	363	10	101	4	21	149	250	131
PANC0403_PANCREAS	PANC0403	pancreas	carcinoma			Pancreas	0.05	35.7374	Resistant	10	50	Intermediate				Intermediate	1693.58	732.504	1	1	1	0.255145	Predicted resistant	59	3	236	7	868	404	1713	519	70	57	733	266	1249	133	83	291	316	929	1022	6	142	3	29	1524	1221	74
HUH7_LIVER	HUH7	liver	carcinoma	hepatocellular_carcinoma		Liver:HCC							0.0001	11.4843	Resistant	Resistant	1707.06	413.19	1	0	0	0.585136	Predicted sensitive	37	3	324	12	360	523	1252	25	41	20	414	253	458	125	52	837	41	580	10	20	198	2	44	2215	351	33
OVTOKO_OVARY	OVTOKO	ovary	carcinoma	clear_cell_carcinoma		Ovary:Carcinoma				10	21	Resistant				Resistant	1708.7	1119.58	1	1	1	0.351139	Predicted resistant	64	12	375	27	306	237	1170	191	56	26	1120	18	2439	64	55	2628	35	729	841	25	115	642	35	5337	393	69
KYM1_SOFT_TISSUE	KYM1	soft_tissue	rhabdomyosarcoma			Soft_Tissue:Sarcoma_Rhabdoid	9.55972e-05	96.1448	Sensitive							Sensitive	1722.34	1713.44	1	1	1	0.595618	Predicted sensitive	96	19	335	6	89	73	1407	82	121	67	1713	13	788	215	54	253	17	264	562	28	997	5	60	5	259	93
RH18_SOFT_TISSUE	RH18	soft_tissue	rhabdomyosarcoma	alveolar		Soft_Tissue:Sarcoma_Rhabdoid	0.00070249	53.0429	Intermediate							Intermediate	1727.04	356.44	1	0	0	0.444508	Predicted resistant	44	34	235	32	299	370	847	49	152	12	357	537	140	223	61	2619	13	497	683	9	141	3	31	1636	707	49
VMRCRCZ_KIDNEY	VMRCRCZ	kidney	carcinoma	renal_cell_carcinoma		Kidney:Carcinoma	0.000203552	73.3303	Sensitive							Sensitive	1732.57	1201.45	1	1	1	0.375938	Predicted resistant	49	2	227	337	318	454	1141	696	99	25	1202	13	3063	102	121	1119	39	389	608	4	75	6149	19	280	334	51
LNCAPCLONEFGC_PROSTATE	LNCAPCLONEFGC	prostate	carcinoma	adenocarcinoma		Prostate							0.0001	24.5883	Resistant	Resistant	1732.42	218.791	1	0	0	0.0680783	Predicted resistant	56	25	121	21	196	161	1188	91	94	15	219	74	480	123	102	18	18	410	172	10	137	7	27	12	238	75
WM1799_SKIN	WM1799	skin	malignant_melanoma			Skin:Melanoma	0.05	0.384166	Resistant							Resistant	1738.42	394.536	1	0	0	0.409379	Predicted resistant	58	3	259	146	113	181	1496	19	84	21	395	15	435	160	85	1535	20	747	2	7	133	4	64	705	299	46
NCIH1395_LUNG	NCIH1395	lung	carcinoma	adenocarcinoma		Lung:NSCLC_Adeno											1737.45	537.982	1	1	1	0.369548	Predicted resistant	42	27	102	2	132	103	606	83	42	19	538	68	710	55	60	3755	23	464	68	18	67	813	2	111	415	85
SIGM5_HAEMATOPOIETIC_AND_LYMPHOID_TISSUE	SIGM5	haematopoietic_and_lymphoid_tissue	haematopoietic_neoplasm	acute_myeloid_leukaemia	M5a	Leukemia:AML	0.05	7.24679	Resistant							Resistant	1741.27	691.191	1	1	1	0.277253	Predicted resistant	110	3	245	900	63	275	412	37	49	50	691	242	1092	255	167	1139	30	423	127	11	183	34	100	5628	243	113
HCC78_LUNG	HCC78	lung	carcinoma	adenocarcinoma		Lung:NSCLC_Adeno											1740	1154.47	1	1	1	0.14686	Predicted resistant	51	123	93	4	259	498	2434	1654	91	49	1155	71	2616	135	305	2173	100	932	987	14	211	484	46	933	361	53
CAL120_BREAST	CAL120	breast	carcinoma			Breast:Carcinoma	0.05	-5.49912	Resistant	10	41.9	Resistant				Resistant	766.311	741.181	0	1	0	0.159014	Predicted resistant	147	39	233	147	496	161	1252	61	82	2	741	716	569	269	262	2028	49	410	34	2	185	353	59	90	359	90
HS739T_BREAST	HS739T	breast	carcinoma			Breast:Carcinoma				10	2.655	Resistant				Resistant	1744.65	224.678	1	0	0	0.0478157	Predicted resistant	175	7	416	34	94	334	2133	34	89	10	225	218	847	91	176	945	23	621	1076	18	131	4	25	166	251	63
TUHR14TKB_KIDNEY	TUHR14TKB	kidney	carcinoma			Kidney:Carcinoma											1745.76	1003.7	1	1	1	0.518599	Predicted sensitive	47	22	334	582	860	377	2067	535	54	28	1004	11	1309	116	258	884	50	590	713	2	109	4628	27	125	263	60
SW579_THYROID	SW579	thyroid	carcinoma	anaplastic_carcinoma		Thyroid				0.0201333	70	Sensitive	0.0001	33.7447	Resistant	Intermediate	402.411	302.423	0	0	0	0.0340427	Predicted resistant	229	4	579	93	255	316	1520	6	42	5	303	6	443	126	95	182	17	1159	80	11	91	598	16	848	559	62
PATU8902_PANCREAS	PATU8902	pancreas	carcinoma	ductal_carcinoma		Pancreas				10	25	Resistant				Resistant	634.282	817.681	0	1	0	0.513773	Predicted sensitive	107	18	115	29	570	469	2230	822	44	4	818	457	423	157	23	173	232	1211	1101	1	82	3	30	153	586	106
CORL105_LUNG	CORL105	lung	carcinoma	adenocarcinoma		Lung:NSCLC_Adeno											1762.91	842.089	1	1	1	0.225493	Predicted resistant	89	68	251	14	658	147	2287	688	100	31	842	62	1453	165	96	2181	52	845	1116	12	158	1	29	501	377	60
SKMES1_LUNG	SKMES1	lung	carcinoma	squamous_cell_carcinoma		Lung:NSCLC_Squamous	0.05	49.644	Resistant	0.0046355	100	Sensitive	5.31592e-06	89.3737	Sensitive	Sensitive	1091.38	665.309	1	1	1	0.602923	Predicted sensitive	80	14	107	3	254	366	1504	695	41	39	666	8	523	125	79	1929	58	1047	166	31	102	439	17	501	367	62
ES2_OVARY	ES2	ovary	carcinoma	clear_cell_carcinoma		Ovary:Carcinoma	0.05	-5.45147	Resistant							Resistant	798.526	675.253	0	1	0	0.124397	Predicted resistant	123	3	247	41	140	199	4045	55	73	23	676	870	431	157	69	1125	65	3747	129	33	88	2	35	6781	359	49
TCCPAN2_PANCREAS	TCCPAN2	pancreas	carcinoma			Pancreas							0.0001	25.8719	Resistant	Resistant	966.022	1496.98	1	1	1	0.573702	Predicted sensitive	296	6	539	2	731	255	683	40	50	48	1497	20	1185	182	111	636	35	755	320	25	60	2	33	35	295	122
PATU8988S_PANCREAS	PATU8988S	pancreas	carcinoma	ductal_carcinoma		Pancreas	0.05	29.6242	Resistant							Resistant	754.518	875.036	0	1	0	0.500366	Predicted sensitive	42	8	245	25	191	465	893	31	54	39	875	168	1169	136	29	2309	73	662	343	4	59	5	31	324	247	68
HS822T_BONE	HS822T	bone	Ewings_sarcoma-peripheral_primitive_neuroectodermal_tumour			Bone:Sarcoma_Ewing											1772.86	174.652	1	0	0	0.03842	Predicted resistant	246	6	280	20	196	274	2361	47	78	2	175	131	511	106	174	3709	17	577	2159	18	164	7	21	221	210	41
HS742T_BREAST	HS742T	breast	carcinoma			Breast:Carcinoma											1781.03	186.891	1	0	0	0.0425769	Predicted resistant	119	2	244	18	132	320	2058	5	109	18	187	169	842	104	167	910	24	549	1388	7	126	14	26	4533	374	52
GCIY_STOMACH	GCIY	stomach	carcinoma	adenocarcinoma		Gastric:Carcinoma				10	25	Resistant				Resistant	1255.61	1078.16	1	1	1	0.158901	Predicted resistant	114	5	320	58	196	224	1108	78	93	31	1078	431	925	121	101	2324	187	346	126	24	151	918	36	12	256	49
JHUEM1_ENDOMETRIUM	JHUEM1	endometrium	carcinoma	adenocarcinoma		Endometrium:Carcinoma											1789.66	393.11	1	0	0	0.273757	Predicted resistant	90	4	864	33	291	270	903	11	113	26	394	119	589	173	82	1442	104	401	396	2	187	180	23	28	376	31
DU4475_BREAST	DU4475	breast	carcinoma	ductal_carcinoma		Breast:Carcinoma	0.05	35.0644	Resistant	0.011	72.65	Sensitive				Intermediate	260.027	420.856	0	0	0	0.355367	Predicted resistant	141	3	290	99	134	1114	1765	109	53	8	421	84	185	157	28	7841	49	290	37	71	92	34	21	68	127	74
RKO_LARGE_INTESTINE	RKO	large_intestine	carcinoma	adenocarcinoma		Colorectal:Carcinoma	0.05	-5.1477	Resistant	10	8	Resistant	0.0001	0.720877	Resistant	Resistant	1921.93	545.054	1	1	1	0.760669	Predicted sensitive	79	16	168	42	219	820	2490	125	72	12	545	24	240	117	38	2595	32	559	717	2	208	5	39	110	198	50
NCIH1299_LUNG	NCIH1299	lung	carcinoma	non_small_cell_carcinoma		Lung:NSCLC_Others	0.05	-5.11004	Resistant				0.0001	13.0256	Resistant	Resistant	560.773	225.104	0	0	0	0.0175958	Predicted resistant	153	13	275	27	159	127	1720	1087	77	16	226	385	497	313	71	1403	45	269	232	23	80	571	58	19	403	47
DU145_PROSTATE	DU145	prostate	carcinoma			Prostate	0.000185206	64.0092	Intermediate				0.0001	24.8575	Resistant	Intermediate	1260.95	441.85	1	0	0	0.0590239	Predicted resistant	111	14	163	15	293	564	3224	1211	90	29	442	1065	2335	96	80	1040	64	1064	415	13	43	592	16	1097	326	33
PEER_HAEMATOPOIETIC_AND_LYMPHOID_TISSUE	PEER	haematopoietic_and_lymphoid_tissue	lymphoid_neoplasm	acute_lymphoblastic_T_cell_leukaemia		Leukemia:ALL	0.05	-5.05224	Resistant							Resistant	16.1607	1044.82	0	1	0	0.0446528	Predicted resistant	168	2	130	177	284	377	814	68	83	66	1045	12	376	275	41	454	25	352	288	12	16	17	36	130	250	62
SNU475_LIVER	SNU475	liver	carcinoma	hepatocellular_carcinoma		Liver:HCC	0.05	46.8614	Resistant				0.0001	6.73845	Resistant	Resistant	408.819	644.719	0	1	0	0.0420218	Predicted resistant	134	4	476	24	167	369	987	23	41	35	645	326	915	138	61	3241	17	2213	379	30	78	44	22	55	526	43
HCC1428_BREAST	HCC1428	breast	carcinoma			Breast:Carcinoma	0.05	-4.75325	Resistant							Resistant	25.9396	444.61	0	0	0	0.00349644	Predicted resistant	127	95	106	266	165	116	885	17	117	17	445	118	483	354	144	3396	34	484	55	17	251	9	35	10	276	76
HS834T_SKIN	HS834T	skin	malignant_melanoma			Skin:Melanoma											1826.96	138.504	1	0	0	0.0457225	Predicted resistant	98	45	268	2	435	317	1988	4	159	16	139	132	610	89	92	2663	18	559	1301	4	119	1	28	142	281	84
253J_URINARY_TRACT	253J	urinary_tract	carcinoma	transitional_cell_carcinoma		Bladder											1827.24	663.922	1	1	1	0.134583	Predicted resistant	1	5	394	192	156	263	1224	726	74	48	664	15	1489	155	73	1737	21	182	1149	11	94	759	40	10919	339	45
SF126_CENTRAL_NERVOUS_SYSTEM	SF126	central_nervous_system	glioma	astrocytoma		CNS:Glioma	3.6032e-05	93.7003	Sensitive				0.0001	52.7814	Intermediate	Sensitive	1335.2	534.271	1	1	1	0.299005	Predicted resistant	155	20	172	20	154	419	2175	144	78	24	535	12	458	95	84	994	127	801	471	3	117	20	20	117	407	67
HSC2_UPPER_AERODIGESTIVE_TRACT	HSC2	upper_aerodigestive_tract	carcinoma	squamous_cell_carcinoma		Upper_Aerodigestive_Tract											1840.97	681.787	1	1	1	0.368572	Predicted resistant	78	4	78	48	167	422	1934	66	139	35	682	455	258	151	66	3349	36	785	583	16	162	9	45	1768	411	64
NUGC4_STOMACH	NUGC4	stomach	carcinoma	signet_ring_adenocarcinoma		Gastric:Carcinoma	0.05	16.7589	Resistant				2.32748e-05	58.8796	Intermediate	Intermediate	2034.79	1325.66	1	1	1	0.765602	Predicted sensitive	81	30	311	27	499	461	587	194	64	34	1326	2	867	312	48	7908	66	610	713	42	150	903	40	215	166	112
MOLM13_HAEMATOPOIETIC_AND_LYMPHOID_TISSUE	MOLM13	haematopoietic_and_lymphoid_tissue	haematopoietic_neoplasm	acute_myeloid_leukaemia	M5a	Leukemia:AML	0.000329093	76.2224	Sensitive				0.0001	34.0542	Resistant	Intermediate	974.869	445.612	1	0	0	0.719123	Predicted sensitive	166	15	432	1266	80	722	585	4	38	41	446	4	465	203	144	291	12	503	154	4	192	4	37	207	227	148
RDES_BONE	RDES	bone	Ewings_sarcoma-peripheral_primitive_neuroectodermal_tumour			Bone:Sarcoma_Ewing							2.79374e-06	91.9164	Sensitive	Sensitive	1848.08	285.265	1	0	0	0.0996563	Predicted resistant	74	11	262	63	109	260	1064	15	199	16	286	248	527	227	22	205	15	1002	1868	16	95	119	96	24	348	156
OCIAML3_HAEMATOPOIETIC_AND_LYMPHOID_TISSUE	OCIAML3	haematopoietic_and_lymphoid_tissue	haematopoietic_neoplasm	acute_myeloid_leukaemia	M4	Leukemia:AML	0.000214674	76.6852	Sensitive							Sensitive	1861.29	532.212	1	1	1	0.682606	Predicted sensitive	75	17	142	929	71	1014	817	11	104	100	533	16	503	156	219	1861	44	611	57	13	148	11	34	9280	251	253
SJSA1_BONE	SJSA1	bone	osteosarcoma			Bone:Sarcoma_Osteo	0.05	-4.71042	Resistant							Resistant	1649.94	202.279	1	0	0	0.0180639	Predicted resistant	188	4	307	85	221	220	1429	22	88	14	203	590	1464	197	119	524	58	1689	425	14	143	24	27	463	292	56
SNU449_LIVER	SNU449	liver	carcinoma	hepatocellular_carcinoma		Liver:HCC	0.000322554	58.0939	Intermediate							Intermediate	1865.88	412.27	1	0	0	0.0816729	Predicted resistant	129	10	142	161	465	447	1451	108	157	32	413	17	2050	130	62	742	58	443	159	4	86	2970	52	568	283	63
K562_HAEMATOPOIETIC_AND_LYMPHOID_TISSUE	K562	haematopoietic_and_lymphoid_tissue	haematopoietic_neoplasm	blast_phase_chronic_myeloid_leukaemia	Ph_positive	Leukemia:CML	0.05	-4.49859	Resistant							Resistant	1806.23	459.079	1	0	0	0.408011	Predicted resistant	66	35	199	19	429	396	885	18	108	64	460	13	534	105	40	2555	5	298	16	10	123	1	36	921	325	119
T173_BONE	T173	bone	osteosarcoma			Bone:Sarcoma_Osteo											1870.71	120.422	1	0	0	0.0141058	Predicted resistant	140	6	161	32	130	263	2489	105	65	3	121	226	830	64	92	9669	27	779	2046	23	116	15	25	129	210	66
PL45_PANCREAS	PL45	pancreas	carcinoma	ductal_carcinoma		Pancreas				10	30	Resistant				Resistant	816.173	774.756	0	1	0	0.119838	Predicted resistant	99	53	205	4	639	529	2252	1107	67	37	775	746	2493	179	113	852	104	680	722	1	69	274	43	179	426	51
NCIH2452_PLEURA	NCIH2452	pleura	mesothelioma			Lung:Mesothelioma	5.3503e-05	80.3828	Sensitive	0.01	60	Intermediate	0.0001	20.7298	Resistant	Intermediate	926.188	273.296	0	0	0	0.339022	Predicted resistant	162	4	42	46	107	755	2024	254	101	16	274	2	545	180	271	80	61	846	240	16	72	7	36	625	219	63
5637_URINARY_TRACT	5637	urinary_tract	carcinoma			Bladder							9.56794e-07	97.7295	Sensitive	Sensitive	1882.23	513.284	1	1	1	0.455801	Predicted resistant	406	7	283	24	475	1140	3343	474	50	20	514	1337	734	94	35	261	137	1607	214	9	71	1289	39	5330	587	60
SNU410_PANCREAS	SNU410	pancreas	carcinoma			Pancreas				10	30	Resistant				Resistant	1387.2	682.651	1	1	1	0.405937	Predicted resistant	125	18	209	34	1100	726	1528	717	169	57	683	1	1678	164	147	886	46	541	398	2	81	97	97	57	471	191
SJRH30_SOFT_TISSUE	SJRH30	soft_tissue	rhabdomyosarcoma			Soft_Tissue:Sarcoma_Rhabdoid	0.05	-4.38212	Resistant							Resistant	659.882	130.848	0	0	0	0.0430294	Predicted resistant	128	25	321	64	72	317	612	1	469	29	131	450	258	515	70	1375	6	187	13	12	131	2	67	13	462	66
PANC1005_PANCREAS	PANC1005	pancreas	carcinoma	ductal_carcinoma		Pancreas	0.05	31.4314	Resistant							Resistant	687.502	733.58	0	1	0	0.0506085	Predicted resistant	101	28	250	1	433	470	1141	275	102	57	734	619	2687	171	113	1488	112	790	524	3	64	155	62	48	563	54
IM95_STOMACH	IM95	stomach	carcinoma	intestinal_adenocarcinoma		Gastric:Carcinoma				1e-05	100	Sensitive				Sensitive	1517.08	910.28	1	1	1	0.631913	Predicted sensitive	169	2	325	119	204	270	384	93	55	74	911	17	576	151	36	1707	11	471	957	17	137	209	21	271	246	93
L33_PANCREAS	L33	pancreas	carcinoma			Pancreas	0.05	-10.2569	Resistant	10	14	Resistant				Resistant	954.28	698.334	0	1	0	0.22826	Predicted resistant	79	6	155	56	160	217	4821	1359	53	41	699	402	363	131	53	504	36	1133	771	18	78	557	25	1873	484	45
KMS18_HAEMATOPOIETIC_AND_LYMPHOID_TISSUE	KMS18	haematopoietic_and_lymphoid_tissue	lymphoid_neoplasm	plasma_cell_myeloma		Lymphoma:Multiple_Myeloma											1906.93	743.773	1	1	1	0.30199	Predicted resistant	82	23	151	893	112	199	1239	1206	114	44	744	51	1396	120	372	294	34	261	1616	5	431	376	108	17	237	85
HS940T_SKIN	HS940T	skin	malignant_melanoma			Skin:Melanoma	0.000101926	93.0879	Sensitive							Sensitive	1909.77	116.297	1	0	0	0.0341114	Predicted resistant	98	4	316	23	240	339	2685	25	86	16	117	80	613	66	91	1787	51	732	1104	8	85	135	25	84	267	65
JURKAT_HAEMATOPOIETIC_AND_LYMPHOID_TISSUE	JURKAT	haematopoietic_and_lymphoid_tissue	lymphoid_neoplasm	acute_lymphoblastic_T_cell_leukaemia		Leukemia:ALL	0.000103188	84.6468	Sensitive	10	39	Resistant				Intermediate	870.252	511.387	0	1	0	0.448967	Predicted resistant	45	18	101	181	337	368	1364	309	216	45	512	11	111	164	347	1113	27	393	248	5	348	33	55	8	349	72
EFE184_ENDOMETRIUM	EFE184	endometrium	carcinoma			Endometrium:Carcinoma											1923.06	692.632	1	1	1	0.249915	Predicted resistant	29	21	161	22	529	414	978	564	70	21	693	811	1217	169	89	581	69	455	378	27	80	1449	45	6975	1060	39
YKG1_CENTRAL_NERVOUS_SYSTEM	YKG1	central_nervous_system	glioma	astrocytoma_Grade_IV	glioblastoma_multiforme	CNS:Glioma_HighGrade	0.05	39.1809	Resistant							Resistant	1929.55	611.872	1	1	1	0.300621	Predicted resistant	92	8	173	28	95	339	1318	9	117	11	612	2	505	270	178	3307	27	229	133	5	89	2	47	28	266	65
K029AX_SKIN	K029AX	skin	malignant_melanoma			Skin:Melanoma	0.05	35.3961	Resistant							Resistant	1931.28	295.095	1	0	0	0.305276	Predicted resistant	92	26	380	116	88	291	1477	8	40	21	296	350	393	127	48	370	42	606	197	10	44	178	36	295	311	75
COLO818_SKIN	COLO818	skin	malignant_melanoma			Skin:Melanoma											1932.44	517.879	1	1	1	0.42869	Predicted resistant	134	11	107	66	133	155	1432	155	29	16	518	5	578	149	99	792	18	306	143	19	124	553	41	5557	563	69
LI7_LIVER	LI7	liver	carcinoma	hepatocellular_carcinoma		Liver:HCC	0.05	18.6549	Resistant							Resistant	1933.71	298.609	1	0	0	0.149493	Predicted resistant	108	4	285	38	231	290	1210	212	131	26	299	11	735	206	64	835	47	3116	193	9	153	607	41	66	253	83
VMCUB1_URINARY_TRACT	VMCUB1	urinary_tract	carcinoma	transitional_cell_carcinoma		Bladder	0.05	-4.13665	Resistant							Resistant	3980.32	734.257	1	1	1	0.518104	Predicted sensitive	32	22	100	39	374	365	1288	227	134	50	735	630	845	118	67	1723	103	764	940	11	165	515	43	1737	406	79
COV434_OVARY	COV434	ovary	sex_cord-stromal_tumour	granulosa_cell_tumour		Ovary:Germline											1950.58	495.263	1	0	0	0.0933448	Predicted resistant	28	5	321	11	65	268	1227	12	214	27	496	384	549	304	140	5496	29	206	866	21	227	3	117	114	278	55
GRANTA519_HAEMATOPOIETIC_AND_LYMPHOID_TISSUE	GRANTA519	haematopoietic_and_lymphoid_tissue	lymphoid_neoplasm	mantle_cell_lymphoma		Lymphoma:NH_B_cell	0.05	11.4591	Resistant							Resistant	1951.12	394.422	1	0	0	0.222904	Predicted resistant	80	15	208	6550	158	490	1062	1132	115	48	395	7	1733	265	815	432	53	288	1048	9	502	180	84	118	354	69
C3A_LIVER	C3A	liver	carcinoma	hepatocellular_carcinoma		Liver:HCC											1959.12	832.761	1	1	1	0.701296	Predicted sensitive	88	3	321	40	540	304	1691	68	122	50	833	38	1557	135	40	459	44	317	651	26	100	4	36	331	377	73
PATU8988T_PANCREAS	PATU8988T	pancreas	carcinoma	ductal_carcinoma		Pancreas				10	38	Resistant				Resistant	795.891	616.952	0	1	0	0.223978	Predicted resistant	178	14	390	39	261	301	1505	139	97	3	617	320	952	243	147	159	14	777	197	12	80	227	31	91	328	101
SKNSH_AUTONOMIC_GANGLIA	SKNSH	autonomic_ganglia	neuroblastoma			CNS:Neuroblastoma	0.000244424	51.8427	Intermediate							Intermediate	1965.78	210.997	1	0	0	0.146428	Predicted resistant	139	17	212	169	146	546	2192	24	83	16	211	30	622	148	130	2786	26	554	621	9	162	135	39	532	210	67
OVMANA_OVARY	OVMANA	ovary	carcinoma	clear_cell_carcinoma		Ovary:Carcinoma											1979.75	724.107	1	1	1	0.217291	Predicted resistant	9	13	348	2	254	81	1157	455	89	44	724	319	791	204	50	1341	98	216	1050	24	899	1326	61	1379	715	51
BT20_BREAST	BT20	breast	carcinoma	ductal_carcinoma		Breast:Carcinoma	8.46869e-05	84.2685	Sensitive	0.01	68.2	Intermediate	0.0001	21.9642	Resistant	Intermediate	158.333	686.369	0	1	0	0.074735	Predicted resistant	49	2	331	19	189	679	848	77	15	116	687	7	822	111	107	2850	48	379	46	9	294	312	23	109	921	50
SKMEL24_SKIN	SKMEL24	skin	malignant_melanoma			Skin:Melanoma	0.000150859	55.5316	Intermediate							Intermediate	1991.59	189.275	1	0	0	0.0537625	Predicted resistant	122	13	450	51	107	38	2600	325	67	2	190	11	487	116	131	2763	35	495	285	4	96	62	19	7939	270	81
A704_KIDNEY	A704	kidney	carcinoma	renal_cell_carcinoma		Kidney:Carcinoma											1997.06	782.303	1	1	1	0.316796	Predicted resistant	2	47	107	333	210	383	3404	2785	52	38	783	17	1337	120	76	4283	31	266	1234	26	127	678	41	15760	124	42
SBC5_LUNG	SBC5	lung	carcinoma	small_cell_carcinoma		Lung:SCLC							0.0001	11.1359	Resistant	Resistant	1998.46	53.1869	1	0	0	0.00311368	Predicted resistant	74	14	124	24	104	164	836	19	128	13	54	453	720	115	69	6032	36	205	24	21	133	680	48	20	308	68
KYSE270_OESOPHAGUS	KYSE270	oesophagus	carcinoma	squamous_cell_carcinoma		Oesophagus:Carcinoma	0.05	-4.05937	Resistant							Resistant	1246.23	152.352	1	0	0	0.17224	Predicted resistant	29	28	128	59	118	297	590	24	100	20	153	261	180	76	45	2526	26	413	177	16	92	1081	39	11	519	49
SKMEL5_SKIN	SKMEL5	skin	malignant_melanoma			Skin:Melanoma	0.05	-4.04371	Resistant							Resistant	839.851	334.657	0	0	0	0.0880833	Predicted resistant	542	2	625	61	180	266	645	30	42	8	335	11	580	151	36	1341	5	2211	116	2	68	271	15	810	387	107
CADOES1_BONE	CADOES1	bone	Ewings_sarcoma-peripheral_primitive_neuroectodermal_tumour			Bone:Sarcoma_Ewing											2005.7	6.3582	1	0	0	0.00820519	Predicted resistant	110	31	189	653	86	433	753	5	227	20	7	11	546	240	129	3065	22	175	7781	1	102	4	41	18	283	188
PANC0203_PANCREAS	PANC0203	pancreas	carcinoma			Pancreas	0.05	40.8496	Resistant	10	60	Intermediate				Intermediate	870.404	1427.16	0	1	0	0.170532	Predicted resistant	68	3	133	18	215	265	1945	951	77	52	1427	270	1582	188	91	765	72	420	388	25	180	534	32	142	574	93
WM115_SKIN	WM115	skin	malignant_melanoma			Skin:Melanoma	0.000789287	102.478	Sensitive							Sensitive	2020.23	367.173	1	0	0	0.324971	Predicted resistant	108	10	537	55	129	242	2611	21	34	1	368	2	396	120	92	3059	13	812	135	14	145	4	33	2641	339	78
HUT102_HAEMATOPOIETIC_AND_LYMPHOID_TISSUE	HUT102	haematopoietic_and_lymphoid_tissue	lymphoid_neoplasm	mycosis_fungoides-Sezary_syndrome		Lymphoma:NH_T_cell											2024.1	1003.17	1	1	1	0.0131808	Predicted resistant	123	20	424	891	252	12	2003	1398	68	38	1003	57	8272	128	378	6618	62	502	3072	38	224	7	76	30	160	90
L363_HAEMATOPOIETIC_AND_LYMPHOID_TISSUE	L363	haematopoietic_and_lymphoid_tissue	lymphoid_neoplasm	plasma_cell_myeloma		Lymphoma:Multiple_Myeloma	0.05	29.9848	Resistant							Resistant	2025.3	816.15	1	1	1	0.248569	Predicted resistant	141	8	179	949	63	378	1408	1032	110	129	816	215	647	203	344	2928	5	488	49	18	219	3	21	6	519	42
LMSU_STOMACH	LMSU	stomach	carcinoma	adenocarcinoma		Gastric:Carcinoma	0.000111287	92.3886	Sensitive							Sensitive	894.947	455.254	0	0	0	0.256147	Predicted resistant	114	8	131	36	151	501	9173	6793	94	19	456	3	509	335	214	1181	65	715	86	20	166	3	47	8013	442	58
HEL9217_HAEMATOPOIETIC_AND_LYMPHOID_TISSUE	HEL9217	haematopoietic_and_lymphoid_tissue	haematopoietic_neoplasm	acute_myeloid_leukaemia	M6	Leukemia:AML	0.05	-3.9133	Resistant				0.0001	6.21284	Resistant	Resistant	1.4358	511.747	0	1	0	0.0204032	Predicted resistant	70	8	447	90	364	617	1399	7	73	64	512	14	638	176	66	3149	46	340	89	3	87	560	52	25	222	110
SH4_SKIN	SH4	skin	malignant_melanoma			Skin:Melanoma	0.05	12.2689	Resistant							Resistant	2038.78	642.129	1	1	1	0.487857	Predicted resistant	106	18	180	54	89	354	2640	242	79	35	642	13	812	253	120	4232	20	406	246	12	137	2	88	3448	243	80
HLC1_LUNG	HLC1	lung	carcinoma	adenocarcinoma		Lung:NSCLC_Adeno	0.05	-3.53345	Resistant							Resistant	1758.18	412.788	1	0	0	0.0962204	Predicted resistant	89	3	69	51	197	444	1722	1	139	20	413	1	845	205	170	3860	46	227	118	9	253	64	58	340	315	46
HS294T_SKIN	HS294T	skin	malignant_melanoma			Skin:Melanoma	0.00100158	90.2861	Sensitive							Sensitive	2058.96	345.703	1	0	0	0.539024	Predicted sensitive	104	22	1162	47	260	485	1468	124	51	18	346	17	440	144	150	394	10	512	416	11	137	148	44	3036	428	81
GMS10_CENTRAL_NERVOUS_SYSTEM	GMS10	central_nervous_system	glioma	astrocytoma_Grade_IV	glioblastoma_multiforme	CNS:Glioma_HighGrade	0.000239423	79.417	Sensitive							Sensitive	2059.61	427.807	1	0	0	0.205385	Predicted resistant	76	18	189	141	290	327	2072	307	51	16	428	710	346	60	84	3397	69	619	606	6	119	4	16	446	947	70
HS819T_BONE	HS819T	bone	chondrosarcoma			Bone:Sarcoma_Chondro											2070.62	178.126	1	0	0	0.073475	Predicted resistant	200	3	292	21	180	236	2152	12	74	5	179	122	497	98	109	1019	16	471	2355	3	152	18	44	77	216	36
EOL1_HAEMATOPOIETIC_AND_LYMPHOID_TISSUE	EOL1	haematopoietic_and_lymphoid_tissue	haematopoietic_neoplasm	acute_myeloid_leukaemia	M5	Leukemia:AML	8.6779e-05	84.7883	Sensitive							Sensitive	2074.39	530.467	1	1	1	0.864485	Predicted sensitive	58	6	274	1269	88	605	680	2	128	55	531	7	534	345	548	88	24	366	66	7	331	12	83	65	168	144
HS616T_HAEMATOPOIETIC_AND_LYMPHOID_TISSUE	HS616T	haematopoietic_and_lymphoid_tissue	lymphoid_neoplasm	Hodgkin_lymphoma		Lymphoma:Hodgkin											2084.06	182.45	1	0	0	0.0829434	Predicted resistant	208	12	423	5	328	374	1714	4	105	15	183	132	551	98	106	3714	26	706	1312	18	151	4	24	176	211	52
ESS1_ENDOMETRIUM	ESS1	endometrium	carcinoma	carcinosarcoma-malignant_mesodermal_mixed_tumour		Endometrium:Others	0.000357498	82.6212	Sensitive				0.0001	35.557	Resistant	Intermediate	1793.5	548.994	1	1	1	0.120072	Predicted resistant	94	26	158	78	169	249	2317	286	112	15	549	1161	898	189	192	857	40	680	1155	8	130	9	54	7696	204	78
TYKNU_OVARY	TYKNU	ovary	carcinoma	undifferentiated_carcinoma		Ovary:Carcinoma				10	33	Resistant				Resistant	2097.51	734.559	1	1	1	0.127969	Predicted resistant	90	19	113	29	324	271	2158	509	54	32	735	16	3255	120	23	1837	45	708	71	21	103	5	26	7822	402	55
HUPT4_PANCREAS	HUPT4	pancreas	carcinoma			Pancreas				10	47	Resistant				Resistant	515.926	464.215	0	0	0	0.539632	Predicted sensitive	115	3	215	11	481	714	1617	487	66	49	465	11	652	123	167	429	70	419	909	3	101	157	23	245	607	148
GDM1_HAEMATOPOIETIC_AND_LYMPHOID_TISSUE	GDM1	haematopoietic_and_lymphoid_tissue	haematopoietic_neoplasm	acute_myeloid_leukaemia	M4	Leukemia:AML											2110.17	817.501	1	1	1	0.848304	Predicted sensitive	55	10	253	1263	190	605	974	7	162	62	818	2	552	239	78	16	9	465	589	4	216	4	42	37	185	154
YD38_UPPER_AERODIGESTIVE_TRACT	YD38	upper_aerodigestive_tract	carcinoma	squamous_cell_carcinoma		Upper_Aerodigestive_Tract											2117.43	567.446	1	1	1	0.0511506	Predicted resistant	100	17	168	38	477	104	845	571	78	50	568	366	1956	160	98	892	98	1850	799	21	99	29	23	3183	8626	44
TE5_OESOPHAGUS	TE5	oesophagus	carcinoma	squamous_cell_carcinoma		Oesophagus:Carcinoma	0.05	-3.46302	Resistant				0.0001	5.42753	Resistant	Resistant	783.063	416.702	0	0	0	0.0857459	Predicted resistant	24	436	62	39	322	231	1648	233	234	43	417	11	421	113	82	7350	31	369	665	12	151	277	39	706	325	43
DBTRG05MG_CENTRAL_NERVOUS_SYSTEM	DBTRG05MG	central_nervous_system	glioma	astrocytoma_Grade_IV	glioblastoma_multiforme	CNS:Glioma_HighGrade	0.000305495	53.1352	Intermediate							Intermediate	2121.91	343.696	1	0	0	0.219773	Predicted resistant	122	9	617	27	659	374	1013	36	102	16	344	1	567	141	145	233	44	796	741	8	78	18	46	784	323	63
GOS3_CENTRAL_NERVOUS_SYSTEM	GOS3	central_nervous_system	glioma	astrocytoma		CNS:Glioma	0.05	8.57696	Resistant							Resistant	2121.22	555.081	1	1	1	0.244105	Predicted resistant	80	32	235	85	343	275	1943	51	51	33	556	10	1077	224	208	9979	83	704	265	31	96	35	29	70	221	73
COLO679_SKIN	COLO679	skin	malignant_melanoma			Skin:Melanoma											2123.95	549.884	1	1	1	0.743267	Predicted sensitive	200	5	280	40	87	618	1358	8	82	29	550	12	238	356	38	1709	29	454	248	20	112	9	48	63	349	59
CALU3_LUNG	CALU3	lung	carcinoma	adenocarcinoma		Lung:NSCLC_Adeno	0.000611792	84.1925	Sensitive							Sensitive	2127.08	1037.38	1	1	1	0.504586	Predicted sensitive	44	25	127	29	434	494	897	1057	38	61	1038	706	1885	206	124	251	93	398	98	12	132	890	44	6898	493	61
IGR39_SKIN	IGR39	skin	malignant_melanoma			Skin:Melanoma	0.000222745	52.8467	Intermediate				0.0001	3.10501	Resistant	Intermediate	1020.04	493.066	1	0	0	0.510549	Predicted sensitive	137	3	272	42	290	348	2203	115	67	24	493	11	433	183	99	206	36	605	82	9	68	764	31	2215	536	48
ASPC1_PANCREAS	ASPC1	pancreas	carcinoma	ductal_carcinoma		Pancreas				10	50	Intermediate				Intermediate	2870.29	844.777	1	1	1	0.143737	Predicted resistant	86	7	139	6	576	330	1735	543	124	67	845	884	2325	219	42	3269	141	959	386	6	118	1	34	161	535	156
HCC1806_BREAST	HCC1806	breast	carcinoma	ductal_carcinoma	squamous_cell_carcinoma	Breast:Carcinoma	0.05	8.19381	Resistant	0.185	59.05	Intermediate				Intermediate	460.307	739.656	0	1	0	0.345049	Predicted resistant	26	6	105	57	224	416	1517	369	242	86	740	3	288	151	63	1576	94	419	544	15	181	653	2	835	659	165
KP3_PANCREAS	KP3	pancreas	carcinoma	ductal_carcinoma		Pancreas	0.05	-7.14419	Resistant	10	18	Resistant				Resistant	2607.64	1695.13	1	1	1	0.197193	Predicted resistant	70	22	133	23	378	238	4030	4213	122	49	1695	838	4881	186	107	342	142	474	681	16	112	16	78	243	325	52
L540_HAEMATOPOIETIC_AND_LYMPHOID_TISSUE	L540	haematopoietic_and_lymphoid_tissue	lymphoid_neoplasm	Hodgkin_lymphoma		Lymphoma:Hodgkin											2147.73	997.511	1	1	1	0.0621383	Predicted resistant	67	39	326	710	106	37	1318	1783	76	23	998	9	7226	100	1113	19	30	427	3074	3	266	1061	36	14	464	104
SNU1272_KIDNEY	SNU1272	kidney	carcinoma	clear_cell_renal_cell_carcinoma		Kidney:Carcinoma											2149.68	517.375	1	1	1	0.182483	Predicted resistant	65	51	416	292	596	534	2743	571	179	10	518	150	1658	124	153	851	55	572	2016	12	202	4352	46	4105	164	38
ECGI10_OESOPHAGUS	ECGI10	oesophagus	carcinoma			Oesophagus:Carcinoma											2176.18	301.725	1	0	0	0.111726	Predicted resistant	26	82	62	9	254	188	1288	494	166	24	302	9	434	115	85	1894	40	997	291	13	133	374	11	8999	471	55
MESSA_SOFT_TISSUE	MESSA	soft_tissue	sarcoma			Soft_Tissue:Sarcoma_Others											2175.41	554.209	1	1	1	0.61002	Predicted sensitive	89	16	654	92	161	279	1055	41	85	23	555	2	568	159	51	2217	38	839	86	24	119	6	16	1	320	136
HCC1395_BREAST	HCC1395	breast	carcinoma	ductal_carcinoma		Breast:Carcinoma	0.05	24.5114	Resistant				3.59204e-06	75.6952	Sensitive	Intermediate	643.817	353.343	0	0	0	0.109831	Predicted resistant	142	18	76	11	120	299	1389	135	60	17	354	13	555	162	79	248	37	882	519	21	66	129	46	479	441	44
COLO783_SKIN	COLO783	skin	malignant_melanoma			Skin:Melanoma											2203.49	346.701	1	0	0	0.349836	Predicted resistant	46	5	417	230	116	372	2243	20	88	45	347	589	430	133	70	258	3	348	236	7	120	39	22	3033	585	89
RT112_URINARY_TRACT	RT112	urinary_tract	carcinoma	transitional_cell_carcinoma		Bladder	0.000121206	94.6441	Sensitive				0.0001	41.827	Resistant	Intermediate	483.563	498.301	0	0	0	0.347826	Predicted resistant	181	36	367	33	250	618	1009	11	125	12	499	7	351	129	83	159	38	603	284	25	86	186	36	91	585	106
SKMEL3_SKIN	SKMEL3	skin	malignant_melanoma			Skin:Melanoma	0.05	23.0958	Resistant							Resistant	2228.13	248.886	1	0	0	0.42874	Predicted resistant	174	19	429	50	180	286	819	44	44	14	249	86	240	99	41	367	27	1266	105	12	70	1373	27	2298	504	73
EHEB_HAEMATOPOIETIC_AND_LYMPHOID_TISSUE	EHEB	haematopoietic_and_lymphoid_tissue	lymphoid_neoplasm	chronic_lymphocytic_leukaemia-small_lymphocytic_lymphoma		Leukemia:CLL											2229.53	303.517	1	0	0	0.0245061	Predicted resistant	105	52	276	1165	210	297	1674	3210	120	72	304	25	7419	112	573	759	9	233	3271	6	501	472	68	58	323	72
NCIH841_LUNG	NCIH841	lung	carcinoma	small_cell_carcinoma		Lung:SCLC	0.05	-3.41538	Resistant							Resistant	772.892	15.5329	0	0	0	0.00323001	Predicted resistant	74	9	121	44	99	272	1458	181	220	7	16	462	454	244	58	2847	32	305	200	16	129	412	54	17	491	112
HS852T_SKIN	HS852T	skin	malignant_melanoma			Skin:Melanoma											2248.99	228.896	1	0	0	0.0295028	Predicted resistant	27	37	172	185	123	43	2167	95	101	18	229	64	271	96	91	3150	16	553	218	10	275	252	23	526	415	91
SNU466_CENTRAL_NERVOUS_SYSTEM	SNU466	central_nervous_system	glioma	astrocytoma_Grade_IV	glioblastoma_multiforme	CNS:Glioma_HighGrade											2257.36	293.522	1	0	0	0.192564	Predicted resistant	109	9	473	89	163	279	2912	31	61	13	294	22	331	166	148	2067	8	364	1686	8	120	21	50	19	321	104
MFE296_ENDOMETRIUM	MFE296	endometrium	carcinoma	adenocarcinoma		Endometrium:Carcinoma	0.05	-3.29842	Resistant				0.0001	4.32272	Resistant	Resistant	646.879	361.375	0	0	0	0.0551043	Predicted resistant	104	16	204	51	153	390	1224	16	133	24	362	171	472	153	80	3634	93	637	1470	10	91	16	43	10	293	79
TUHR10TKB_KIDNEY	TUHR10TKB	kidney	carcinoma			Kidney:Carcinoma											2267.87	988.562	1	1	1	0.37256	Predicted resistant	88	65	392	37	570	481	3528	2827	123	40	989	11	1918	117	112	910	64	742	1659	9	137	802	59	994	170	81
LXF289_LUNG	LXF289	lung	carcinoma	adenocarcinoma		Lung:NSCLC_Adeno	0.05	10.6645	Resistant							Resistant	2269.73	474.05	1	0	0	0.149355	Predicted resistant	61	11	44	9	352	414	3724	1376	192	29	474	519	2088	136	178	144	38	536	242	15	159	244	29	572	265	120
SKNMC_BONE	SKNMC	bone	Ewings_sarcoma-peripheral_primitive_neuroectodermal_tumour			Bone:Sarcoma_Ewing							1.4113e-05	69.4611	Intermediate	Intermediate	2275.17	140.393	1	0	0	0.27655	Predicted resistant	67	5	291	152	95	561	857	11	87	22	141	487	336	256	21	168	18	757	46	12	163	487	75	10	354	93
UACC62_SKIN	UACC62	skin	malignant_melanoma			Skin:Melanoma	0.05	25.3744	Resistant							Resistant	2289.36	486.163	1	0	0	0.195658	Predicted resistant	75	22	399	57	87	140	1016	5	53	25	487	8	330	93	32	1225	26	400	237	21	100	15	35	3061	538	96
UACC812_BREAST	UACC812	breast	carcinoma	ductal_carcinoma		Breast:Carcinoma				0.105	58.4	Intermediate				Intermediate	836.778	207.809	0	0	0	0.661416	Predicted sensitive	37	3	124	21	147	705	680	13	175	24	208	18	67	114	164	857	42	197	29	15	212	65	78	3	230	142
PSN1_PANCREAS	PSN1	pancreas	carcinoma	ductal_carcinoma		Pancreas	0.000391198	55.5088	Intermediate	1e-05	86	Sensitive				Sensitive	1882.94	1061.95	1	1	1	0.503798	Predicted sensitive	166	3	391	18	335	527	1019	83	183	11	1062	3	1829	200	93	2545	17	587	147	11	167	869	53	236	388	115
HS729_SOFT_TISSUE	HS729	soft_tissue	rhabdomyosarcoma			Soft_Tissue:Sarcoma_Rhabdoid	0.05	-2.82738	Resistant							Resistant	668.701	94.974	0	0	0	0.0322647	Predicted resistant	237	29	255	33	201	298	1506	39	78	5	95	811	66	89	87	7063	46	867	363	10	104	4	57	2720	305	96
T3M4_PANCREAS	T3M4	pancreas	carcinoma	ductal_carcinoma		Pancreas							1.10536e-05	66.3792	Intermediate	Intermediate	1842.84	636.018	1	1	1	0.541295	Predicted sensitive	94	32	106	22	230	336	1857	707	100	49	636	125	378	113	98	946	86	465	284	34	283	94	62	2374	586	73
VMRCRCW_KIDNEY	VMRCRCW	kidney	carcinoma			Kidney:Carcinoma				10	38	Resistant				Resistant	2316.58	1670.56	1	1	1	0.556773	Predicted sensitive	74	20	129	91	424	464	1737	607	54	28	1670	922	1704	116	132	3267	32	493	823	33	61	729	38	1289	348	40
NMCG1_CENTRAL_NERVOUS_SYSTEM	NMCG1	central_nervous_system	glioma			CNS:Glioma							0.0001	25.2813	Resistant	Resistant	2323.89	143.303	1	0	0	0.0336847	Predicted resistant	144	10	537	97	686	321	1042	30	76	8	144	6	929	192	126	4074	41	917	1068	21	163	3	49	947	254	50
DKMG_CENTRAL_NERVOUS_SYSTEM	DKMG	central_nervous_system	glioma	astrocytoma_Grade_IV	glioblastoma_multiforme	CNS:Glioma_HighGrade	0.000552516	51.5047	Intermediate				0.0001	-2.20714	Resistant	Intermediate	2827.86	359.435	1	0	0	0.148207	Predicted resistant	35	2	252	99	61	246	2025	16	75	24	360	2	431	210	362	254	8	197	610	11	390	2	105	65	264	37
MHHES1_BONE	MHHES1	bone	Ewings_sarcoma-peripheral_primitive_neuroectodermal_tumour			Bone:Sarcoma_Ewing											1663.1	448.813	1	0	0	0.0441523	Predicted resistant	26	19	59	181	112	134	1620	57	153	8	435	51	885	254	133	4024	22	432	633	11	373	286	65	27	290	77
COLO829_SKIN	COLO829	skin	malignant_melanoma			Skin:Melanoma	0.05	21.772	Resistant							Resistant	2337.92	640.672	1	1	1	0.206111	Predicted resistant	87	7	316	44	177	110	1512	19	68	8	641	1499	388	124	37	1853	19	475	448	10	163	6	31	5237	491	108
HUPT3_PANCREAS	HUPT3	pancreas	carcinoma			Pancreas	0.000278394	54.3921	Intermediate				3.64343e-06	86.0441	Sensitive	Sensitive	904.918	733.107	0	1	0	0.427372	Predicted resistant	37	16	191	45	359	395	1380	1351	52	25	734	8	469	166	65	492	91	673	295	10	119	965	17	383	721	52
CAPAN1_PANCREAS	CAPAN1	pancreas	carcinoma	ductal_carcinoma		Pancreas	0.000206966	54.1096	Intermediate	10	18	Resistant				Intermediate	1124.51	719.909	1	1	1	0.565732	Predicted sensitive	13	27	240	8	591	825	1583	2260	46	103	720	1	2073	193	32	1429	66	877	269	13	145	642	53	1792	321	94
LN229_CENTRAL_NERVOUS_SYSTEM	LN229	central_nervous_system	glioma	astrocytoma_Grade_IV	glioblastoma_multiforme	CNS:Glioma_HighGrade	0.05	-2.67424	Resistant							Resistant	1161.43	307.651	1	0	0	0.0710761	Predicted resistant	200	33	171	128	97	189	1730	35	51	19	308	24	616	99	97	1924	31	1120	284	16	74	4	32	1101	327	52
MDAMB468_BREAST	MDAMB468	breast	carcinoma			Breast:Carcinoma	0.05	0.236361	Resistant	0.01	68.65	Intermediate	0.0001	5.01945	Resistant	Resistant	336.926	567.083	0	1	0	0.0851443	Predicted resistant	129	3	253	39	248	1070	1491	289	65	58	568	539	647	172	75	1913	23	766	64	17	146	327	33	585	326	96
MKN45_STOMACH	MKN45	stomach	carcinoma	diffuse_adenocarcinoma		Gastric:Carcinoma	0.05	-2.66	Resistant	0.0150476	75	Sensitive				Intermediate	704.444	784.561	0	1	0	0.585026	Predicted sensitive	87	4	176	22	517	327	672	57	138	37	785	14	686	396	90	690	25	671	315	12	183	352	47	344	547	102
JHH4_LIVER	JHH4	liver	carcinoma	hepatocellular_carcinoma		Liver:HCC							1.28106e-05	84.7912	Sensitive	Sensitive	2401.77	1155.62	1	1	1	0.622357	Predicted sensitive	114	7	230	107	295	418	787	106	105	31	1156	361	817	175	42	814	58	629	43	22	151	17	26	60	276	69
SKHEP1_LIVER	SKHEP1	liver	carcinoma	adenocarcinoma		Liver:Carcinoma_Adeno							0.0001	10.6814	Resistant	Resistant	2408.82	1135.78	1	1	1	0.134382	Predicted resistant	64	2	583	32	158	204	2359	643	120	33	1136	5	3134	303	250	502	40	272	542	16	194	759	58	2667	230	55
RVH421_SKIN	RVH421	skin	malignant_melanoma			Skin:Melanoma	0.05	-2.65735	Resistant							Resistant	2412.66	770.555	1	1	1	0.632696	Predicted sensitive	158	8	277	104	81	315	6252	48	37	37	771	4	732	75	46	836	23	640	305	12	110	6	42	864	371	63
G361_SKIN	G361	skin	malignant_melanoma			Skin:Melanoma	0.000118474	85.5021	Sensitive				0.0001	31.0433	Resistant	Intermediate	2185.31	652.544	1	1	1	0.547513	Predicted sensitive	170	3	485	93	72	160	739	17	44	23	653	17	159	200	52	199	31	743	213	15	137	132	27	1330	430	51
TM31_CENTRAL_NERVOUS_SYSTEM	TM31	central_nervous_system	glioma	astrocytoma		CNS:Glioma											2453.29	202.849	1	0	0	0.0461406	Predicted resistant	70	7	111	67	234	201	1265	15	167	10	203	9	1585	109	184	2017	144	1176	56	9	159	16	41	1400	316	62
BHT101_THYROID	BHT101	thyroid	carcinoma	anaplastic_carcinoma		Thyroid											2494.66	765.475	1	1	1	0.254307	Predicted resistant	40	3	183	7	86	82	1335	959	166	44	766	520	810	159	167	177	63	445	482	21	164	2	81	3272	312	53
MSTO211H_PLEURA	MSTO211H	pleura	mesothelioma			Lung:Mesothelioma	0.00017701	92.8397	Sensitive	0.0025	98	Sensitive	0.0001	28.0668	Resistant	Sensitive	3135.92	538.341	1	1	1	0.589146	Predicted sensitive	129	5	456	78	224	678	2096	821	49	18	539	10	1339	207	461	124	29	623	328	10	77	437	50	11958	241	54
A101D_SKIN	A101D	skin	malignant_melanoma			Skin:Melanoma	0.000314937	94.0209	Sensitive							Sensitive	2507.57	495.725	1	0	0	0.60235	Predicted sensitive	156	6	415	78	144	424	2712	196	59	18	496	4	594	176	80	180	7	551	470	8	103	46	46	12866	330	42
KMH2_HAEMATOPOIETIC_AND_LYMPHOID_TISSUE	KMH2	haematopoietic_and_lymphoid_tissue	lymphoid_neoplasm	Hodgkin_lymphoma		Lymphoma:Hodgkin											2518.5	855.593	1	1	1	0.152633	Predicted resistant	119	6	254	393	149	5	1416	960	153	56	856	9	1561	331	53	191	26	156	2302	19	536	11	209	36	178	68
FU97_STOMACH	FU97	stomach	carcinoma	diffuse_adenocarcinoma		Gastric:Carcinoma				0.026	96	Sensitive				Sensitive	2295.72	150.244	1	0	0	0.072698	Predicted resistant	43	12	226	7	115	253	1203	18	93	32	151	94	1103	128	88	1762	48	466	11	23	57	2	38	15	369	69
COLO849_SKIN	COLO849	skin	malignant_melanoma			Skin:Melanoma											2540.61	684.955	1	1	1	0.569532	Predicted sensitive	71	3	728	55	127	230	744	1	58	7	685	2213	264	162	40	840	9	319	241	2	125	7	21	2030	399	71
NCIH1975_LUNG	NCIH1975	lung	carcinoma	non_small_cell_carcinoma		Lung:NSCLC_Others	0.000151562	75.0815	Sensitive				0.0001	19.0184	Resistant	Intermediate	736.838	870.373	0	1	0	0.102887	Predicted resistant	74	18	180	1	261	187	1008	10	77	24	871	68	763	48	91	2613	50	1477	251	10	106	16	34	163	708	46
MKN7_STOMACH	MKN7	stomach	carcinoma	tubular_adenocarcinoma		Gastric:Carcinoma	0.00016166	75.3219	Sensitive	10	19	Resistant				Intermediate	427.237	838.517	0	1	0	0.496619	Predicted resistant	53	15	82	15	366	509	2012	870	65	44	839	367	756	104	43	500	234	1035	110	11	85	12	21	412	1128	78
HT55_LARGE_INTESTINE	HT55	large_intestine	carcinoma	adenocarcinoma		Colorectal:Carcinoma	0.00014	90.2694	Sensitive							Sensitive	1353.55	910.24	1	1	1	0.584954	Predicted sensitive	32	4	144	7	148	321	1182	126	80	48	910	15	1205	361	47	2301	54	391	84	15	134	4	29	14	276	111
253JBV_URINARY_TRACT	253JBV	urinary_tract	carcinoma	transitional_cell_carcinoma		Bladder											2597.43	614.269	1	1	1	0.0422913	Predicted resistant	23	15	284	78	384	337	1371	1334	100	57	615	52	3201	141	77	1570	31	275	1656	4	132	1003	77	11220	254	28
PK59_PANCREAS	PK59	pancreas	carcinoma			Pancreas				0.037	74	Sensitive				Sensitive	2090.9	469.261	1	0	0	0.455089	Predicted resistant	30	13	283	94	585	495	1459	200	241	13	470	279	1207	113	128	1059	193	466	549	28	78	5	71	601	968	161
HS939T_SKIN	HS939T	skin	malignant_melanoma			Skin:Melanoma	0.05	-2.58661	Resistant							Resistant	2610.59	421.972	1	0	0	0.495751	Predicted resistant	226	3	277	137	85	211	3308	64	45	18	422	46	285	119	39	3090	17	813	411	11	86	3	16	3148	283	63
IGR1_SKIN	IGR1	skin	malignant_melanoma			Skin:Melanoma	0.000370501	55.4705	Intermediate							Intermediate	2621.97	179.591	1	0	0	0.294297	Predicted resistant	46	3	229	152	105	151	984	31	129	20	180	1	358	205	99	158	48	254	65	13	136	32	68	1897	255	63
KNS81_CENTRAL_NERVOUS_SYSTEM	KNS81	central_nervous_system	glioma	astrocytoma_Grade_IV	glioblastoma_multiforme	CNS:Glioma_HighGrade											2630.33	226.951	1	0	0	0.203192	Predicted resistant	88	10	168	73	251	251	2285	213	92	19	227	13	491	204	295	1700	163	640	790	18	237	15	35	28	190	54
PANC1_PANCREAS	PANC1	pancreas	carcinoma	ductal_carcinoma		Pancreas	0.000260473	54.628	Intermediate				0.0001	9.8965	Resistant	Intermediate	453.596	534.353	0	1	0	0.0889029	Predicted resistant	77	3	50	11	293	622	7240	2237	41	13	535	2	477	136	25	1867	55	760	356	2	40	4	32	80	367	56
D341MED_CENTRAL_NERVOUS_SYSTEM	D341MED	central_nervous_system	primitive_neuroectodermal_tumour-medulloblastoma			CNS:Medulloblastoma											2754.98	3.9874	1	0	0	0.0249142	Predicted resistant	160	30	188	17	352	183	890	5	193	10	4	59	377	246	150	165	54	246	84	5	223	290	73	25	168	288
HGC27_STOMACH	HGC27	stomach	carcinoma	undifferentiated_adenocarcinoma		Gastric:Carcinoma	0.00010255	73.6825	Sensitive	10	17	Resistant				Intermediate	894.051	215.153	0	0	0	0.111892	Predicted resistant	121	9	213	52	71	284	747	10	98	4	216	472	116	118	75	1414	20	308	483	11	72	775	23	9	461	60
OCUM1_STOMACH	OCUM1	stomach	carcinoma	diffuse_adenocarcinoma		Gastric:Carcinoma	0.000157165	88.9301	Sensitive							Sensitive	2025.56	535.818	1	1	1	0.568777	Predicted sensitive	63	17	891	13	479	497	1392	160	91	26	536	95	426	174	37	3942	25	833	514	65	151	13	3	1345	299	85
REH_HAEMATOPOIETIC_AND_LYMPHOID_TISSUE	REH	haematopoietic_and_lymphoid_tissue	lymphoid_neoplasm	acute_lymphoblastic_B_cell_leukaemia		Leukemia:ALL	2.3788e-05	95.3533	Sensitive				0.0001	38.2332	Resistant	Intermediate	617.603	526.793	0	1	0	0.631773	Predicted sensitive	83	4	302	1213	128	680	574	2	103	39	527	6	155	220	55	2	36	385	72	10	1021	362	79	71	169	69
KCIMOH1_PANCREAS	KCIMOH1	pancreas	carcinoma	ductal_carcinoma		Pancreas				0.004	86	Sensitive				Sensitive	830.048	570.874	0	1	0	0.282271	Predicted resistant	72	28	287	27	378	999	1776	160	100	11	571	193	506	107	35	2437	160	575	795	23	151	4	38	290	428	80
COLO792_SKIN	COLO792	skin	malignant_melanoma			Skin:Melanoma	0.000163716	99.0608	Sensitive							Sensitive	2803.73	1053.63	1	1	1	0.363705	Predicted resistant	89	14	284	173	112	144	1266	27	53	38	1054	180	789	107	44	3402	23	376	201	21	222	3	229	424	216	62
JVM3_HAEMATOPOIETIC_AND_LYMPHOID_TISSUE	JVM3	haematopoietic_and_lymphoid_tissue	lymphoid_neoplasm	chronic_lymphocytic_leukaemia-small_lymphocytic_lymphoma		Leukemia:CLL	0.05	29.5268	Resistant							Resistant	2803.48	617.38	1	1	1	0.144195	Predicted resistant	77	31	393	2151	239	342	1424	1478	125	108	618	62	2920	125	668	660	20	224	2857	8	957	241	72	269	365	84
LAMA84_HAEMATOPOIETIC_AND_LYMPHOID_TISSUE	LAMA84	haematopoietic_and_lymphoid_tissue	haematopoietic_neoplasm	blast_phase_chronic_myeloid_leukaemia		Leukemia:CML	0.05	11.4355	Resistant							Resistant	2826.3	700.918	1	1	1	0.574991	Predicted sensitive	65	11	85	116	462	436	1426	2	181	54	701	20	1680	131	200	3937	37	426	84	13	395	10	70	1085	124	217
NCIH1437_LUNG	NCIH1437	lung	carcinoma	adenocarcinoma		Lung:NSCLC_Adeno	0.000176475	85.6021	Sensitive				0.0001	27.4038	Resistant	Intermediate	1132.62	409.674	1	0	0	0.125899	Predicted resistant	44	27	189	11	186	268	1112	180	85	9	410	6	522	118	106	2901	20	684	90	14	90	940	39	193	392	75
SUPM2_HAEMATOPOIETIC_AND_LYMPHOID_TISSUE	SUPM2	haematopoietic_and_lymphoid_tissue	lymphoid_neoplasm	anaplastic_large_cell_lymphoma		Lymphoma:NH_T_cell	4.90849e-05	82.7264	Sensitive							Sensitive	2832	1327.78	1	1	1	0.18973	Predicted resistant	34	30	518	156	81	24	1927	1249	181	15	1328	197	1043	181	207	89	34	245	705	20	263	226	113	110	211	61
PANC0813_PANCREAS	PANC0813	pancreas	carcinoma	ductal_carcinoma		Pancreas				1e-05	90	Sensitive				Sensitive	907.804	1067.32	0	1	0	0.828289	Predicted sensitive	191	5	161	7	553	1720	2172	1057	57	62	1067	10	935	88	19	1466	135	1298	298	17	167	665	33	2815	820	84
SNU899_UPPER_AERODIGESTIVE_TRACT	SNU899	upper_aerodigestive_tract	carcinoma	squamous_cell_carcinoma		Upper_Aerodigestive_Tract											2896.28	772.576	1	1	1	0.641412	Predicted sensitive	74	29	53	15	626	817	1014	484	150	76	773	658	888	113	95	1069	67	612	749	18	126	817	31	12155	959	100
COLO201_LARGE_INTESTINE	COLO201	large_intestine	carcinoma	adenocarcinoma		Colorectal:Carcinoma				1e-05	91	Sensitive				Sensitive	1027.87	703.998	1	1	1	0.347984	Predicted resistant	137	7	180	12	637	534	1147	46	88	17	704	230	1083	233	105	1931	56	555	35	209	121	3	45	144	410	105
HS821T_BONE	HS821T	bone	giant_cell_tumour			Bone:Sarcoma_Giant_Cell											2902.61	247.446	1	0	0	0.050563	Predicted resistant	140	41	372	92	325	161	2908	89	87	8	248	80	688	139	143	3631	26	476	1574	23	178	11	3	314	508	70
CCK81_LARGE_INTESTINE	CCK81	large_intestine	carcinoma	adenocarcinoma		Colorectal:Carcinoma	0.000217605	92.1657	Sensitive							Sensitive	734.887	488.749	0	0	0	0.373152	Predicted resistant	50	5	125	37	66	452	496	3	83	2	489	17	352	327	34	1068	51	375	167	19	142	9	62	28	204	51
YAPC_PANCREAS	YAPC	pancreas	carcinoma			Pancreas	4.93138e-05	91.5334	Sensitive							Sensitive	1158.62	611.394	1	1	1	0.630737	Predicted sensitive	39	19	112	47	721	1229	2226	517	154	75	612	34	633	201	131	1407	123	722	243	9	168	217	55	2703	335	116
DEL_HAEMATOPOIETIC_AND_LYMPHOID_TISSUE	DEL	haematopoietic_and_lymphoid_tissue	lymphoid_neoplasm	anaplastic_large_cell_lymphoma		Lymphoma:NH_T_cell	0.05	49.3397	Resistant							Resistant	2943.9	611.075	1	1	1	0.172738	Predicted resistant	90	45	118	50	111	155	2915	4070	151	24	611	122	1204	91	178	1621	3	280	306	11	263	1003	75	7363	421	95
PK45H_PANCREAS	PK45H	pancreas	carcinoma			Pancreas				0.00505	92	Sensitive				Sensitive	1283.32	595.151	1	1	1	0.307818	Predicted resistant	123	74	163	37	362	402	1048	100	172	31	595	6	1012	153	195	588	68	382	352	26	113	4	44	46	332	62
JL1_PLEURA	JL1	pleura	mesothelioma			Lung:Mesothelioma											2951.6	1340.48	1	1	1	0.597374	Predicted sensitive	167	20	169	19	348	403	574	148	124	62	1341	3	3163	310	292	1168	219	654	306	8	150	245	40	1345	326	35
SU8686_PANCREAS	SU8686	pancreas	carcinoma	ductal_carcinoma		Pancreas							3.94577e-06	96.5359	Sensitive	Sensitive	3174.66	1111.31	1	1	1	0.934292	Predicted sensitive	42	35	54	8	515	1173	1881	1335	73	60	1111	13	2048	148	206	347	195	603	88	14	240	447	49	2081	530	101
GAMG_CENTRAL_NERVOUS_SYSTEM	GAMG	central_nervous_system	glioma			CNS:Glioma	0.05	-2.51856	Resistant							Resistant	2298.97	423.824	1	0	0	0.223469	Predicted resistant	129	19	169	46	306	370	2670	726	84	11	424	7	878	166	94	981	66	972	197	1	65	10	36	9363	456	62
WM793_SKIN	WM793	skin	malignant_melanoma			Skin:Melanoma	0.05	15.2578	Resistant							Resistant	3049.73	517.638	1	1	1	0.526351	Predicted sensitive	20	3	219	102	239	303	2728	58	89	14	518	597	267	144	99	2059	19	550	388	10	153	394	27	13368	599	65
SUDHL1_HAEMATOPOIETIC_AND_LYMPHOID_TISSUE	SUDHL1	haematopoietic_and_lymphoid_tissue	lymphoid_neoplasm	anaplastic_large_cell_lymphoma		Lymphoma:NH_T_cell											3072.64	547.944	1	1	1	0.344371	Predicted resistant	70	32	172	82	72	210	1072	374	119	17	548	196	853	418	184	207	26	239	232	11	170	891	51	21	540	70
JURLMK1_HAEMATOPOIETIC_AND_LYMPHOID_TISSUE	JURLMK1	haematopoietic_and_lymphoid_tissue	haematopoietic_neoplasm	blast_phase_chronic_myeloid_leukaemia		Leukemia:CML											3076.56	859.69	1	1	1	0.298635	Predicted resistant	50	29	101	164	1119	402	1066	4	90	82	860	3	3192	198	157	6874	8	232	196	5	364	4	42	2093	643	139
SW780_URINARY_TRACT	SW780	urinary_tract	carcinoma	transitional_cell_carcinoma		Bladder											3077.31	880.667	1	1	1	0.93254	Predicted sensitive	67	10	549	36	234	513	1409	40	122	31	881	10	409	39	61	415	25	614	432	8	146	12	51	55	416	160
JHUEM2_ENDOMETRIUM	JHUEM2	endometrium	carcinoma	adenocarcinoma		Endometrium:Carcinoma	0.000405561	74.4905	Sensitive							Sensitive	3117.33	621.152	1	1	1	0.371163	Predicted resistant	59	17	277	94	89	488	1271	11	154	3	622	118	642	366	82	2848	39	472	3324	3	202	3	25	11	277	51
SCC4_UPPER_AERODIGESTIVE_TRACT	SCC4	upper_aerodigestive_tract	carcinoma	squamous_cell_carcinoma		Upper_Aerodigestive_Tract				0.044	80	Sensitive	0.0001	18.309	Resistant	Intermediate	1511.16	287.201	1	0	0	0.355384	Predicted resistant	38	4	135	3	314	411	997	547	89	26	288	56	360	96	54	1281	88	2529	518	25	151	1976	31	2784	506	29
PANC0504_PANCREAS	PANC0504	pancreas	carcinoma			Pancreas				1e-05	100	Sensitive				Sensitive	2572.26	1220.58	1	1	1	0.900652	Predicted sensitive	179	2	273	20	498	971	1231	710	85	43	1221	2	595	149	129	741	108	949	777	17	123	262	28	1726	222	67
MPP89_PLEURA	MPP89	pleura	mesothelioma			Lung:Mesothelioma				0.37	52	Intermediate				Intermediate	883.588	380.069	0	0	0	0.0639748	Predicted resistant	86	58	176	20	232	209	819	114	56	44	380	1805	603	81	62	9224	52	416	163	15	103	6	20	96	395	57
TOV112D_OVARY	TOV112D	ovary	carcinoma	endometrioid_carcinoma		Ovary:Carcinoma	0.05	-2.49578	Resistant				0.0001	10.7364	Resistant	Resistant	1144.83	2.1242	1	0	0	0.00144815	Predicted resistant	146	24	442	21	136	354	711	18	104	20	3	429	636	330	55	5722	33	158	85	11	104	826	77	9	290	100
SKMEL2_SKIN	SKMEL2	skin	malignant_melanoma			Skin:Melanoma	0.000149265	68.5958	Intermediate							Intermediate	514.96	416.589	0	0	0	0.049375	Predicted resistant	158	6	83	60	105	168	955	26	59	16	417	127	197	186	69	1197	43	2439	20	13	140	2	44	508	366	65
ONS76_CENTRAL_NERVOUS_SYSTEM	ONS76	central_nervous_system	primitive_neuroectodermal_tumour-medulloblastoma			CNS:Medulloblastoma							0.0001	5.44987	Resistant	Resistant	3322.5	234.537	1	0	0	0.35117	Predicted resistant	122	3	97	26	117	229	359	20	53	26	235	6	257	84	78	476	22	337	606	16	78	70	56	2912	437	75
NUGC2_STOMACH	NUGC2	stomach	carcinoma	adenocarcinoma		Gastric:Carcinoma											1186.22	842.064	1	1	1	0.649646	Predicted sensitive	165	18	163	28	438	727	606	69	63	56	842	13	583	83	53	600	69	983	166	22	104	12	26	103	395	100
HS706T_BONE	HS706T	bone	giant_cell_tumour			Bone:Sarcoma_Giant_Cell											3483.39	321.618	1	0	0	0.134237	Predicted resistant	171	10	356	81	161	167	5900	18	63	2	322	18	447	75	101	4949	65	660	2603	5	124	16	15	45	259	45
AGS_STOMACH	AGS	stomach	carcinoma	adenocarcinoma		Gastric:Carcinoma	0.05	-13.2776	Resistant	10	14	Resistant	0.0001	5.04298	Resistant	Resistant	1414.93	675.977	1	1	1	0.417155	Predicted resistant	68	12	941	8	478	393	1153	35	80	29	676	11	573	108	34	1360	170	523	263	19	176	9	32	38	487	61
HEC265_ENDOMETRIUM	HEC265	endometrium	carcinoma	adenocarcinoma		Endometrium:Carcinoma	9.81589e-05	95.186	Sensitive							Sensitive	3544.39	562.923	1	1	1	0.833098	Predicted sensitive	59	3	266	51	211	936	2544	760	48	20	563	25	749	179	82	50	93	884	1387	3	143	4	50	8347	310	27
TE441T_SOFT_TISSUE	TE441T	soft_tissue	rhabdomyosarcoma			Soft_Tissue:Sarcoma_Rhabdoid											3595.23	81.7417	1	0	0	0.442779	Predicted resistant	96	7	287	844	54	1017	763	1	136	14	82	79	269	289	89	28	44	284	92	6	410	5	78	14	369	92
HS936T_SKIN	HS936T	skin	malignant_melanoma			Skin:Melanoma	0.05	7.55258	Resistant							Resistant	3672.64	203.237	1	0	0	0.189632	Predicted resistant	121	3	115	108	198	228	805	10	96	26	204	367	260	128	61	2003	37	643	345	11	48	8	37	77	282	73
RMGI_OVARY	RMGI	ovary	carcinoma	clear_cell_carcinoma		Ovary:Carcinoma							0.0001	28.3435	Resistant	Resistant	3708.1	459.242	1	0	0	0.380001	Predicted resistant	145	12	833	26	810	127	707	94	57	7	460	20	1151	169	22	453	44	560	484	28	136	621	23	3003	604	42
EFO21_OVARY	EFO21	ovary	carcinoma	serous_carcinoma		Ovary:Carcinoma				10	0	Resistant				Resistant	3803.43	797.405	1	1	1	0.281166	Predicted resistant	37	17	137	48	923	252	3087	420	100	41	798	379	935	173	138	2658	12	601	322	15	69	204	32	12587	487	26
HARA_LUNG	HARA	lung	carcinoma	squamous_cell_carcinoma		Lung:NSCLC_Squamous	0.05	-2.46247	Resistant				0.0001	36.4802	Resistant	Resistant	632.408	334.197	0	0	0	0.0182275	Predicted resistant	159	20	188	16	130	247	391	20	172	7	335	1600	326	174	85	1338	44	958	584	15	245	108	34	959	291	70
TUHR4TKB_KIDNEY	TUHR4TKB	kidney	carcinoma			Kidney:Carcinoma											4091.47	684.752	1	1	1	0.660533	Predicted sensitive	60	22	464	237	709	546	2585	946	102	19	685	49	1640	92	222	1438	51	544	1370	4	169	1910	61	6973	220	52
HEC108_ENDOMETRIUM	HEC108	endometrium	carcinoma	adenocarcinoma		Endometrium:Carcinoma											4125.74	517.866	1	1	1	0.663109	Predicted sensitive	32	5	457	115	289	229	1981	576	110	60	518	25	542	63	106	447	48	340	879	2	218	598	62	2436	259	57
SH10TC_STOMACH	SH10TC	stomach	carcinoma			Gastric:Carcinoma	0.05	23.0256	Resistant				0.0001	5.36913	Resistant	Resistant	780.383	930.168	0	1	0	0.105839	Predicted resistant	105	20	255	16	269	143	1954	431	85	37	930	237	1519	134	26	977	67	638	76	9	113	18	26	26	494	79
KMRC3_KIDNEY	KMRC3	kidney	carcinoma	clear_cell_renal_cell_carcinoma		Kidney:Carcinoma											4251.47	1000.69	1	1	1	0.543837	Predicted sensitive	150	6	368	183	418	355	3183	542	130	31	1001	257	2077	87	96	3329	27	581	2914	5	126	6196	36	5666	158	55
ABC1_LUNG	ABC1	lung	carcinoma	non_small_cell_carcinoma		Lung:NSCLC_Others	0.000108084	73.6033	Sensitive				0.0001	7.76923	Resistant	Intermediate	543.461	243.122	0	0	0	0.135354	Predicted resistant	41	74	130	54	206	1728	1589	179	104	19	244	154	658	166	40	3401	240	549	6	2	215	22	37	80	167	33
JHOC5_OVARY	JHOC5	ovary	carcinoma	clear_cell_carcinoma		Ovary:Carcinoma											4280.39	812.96	1	1	1	0.126694	Predicted resistant	104	23	292	325	451	213	2593	2693	85	30	813	3	3554	143	72	1405	73	488	569	8	182	1537	4	6826	1049	36
TGBC11TKB_STOMACH	TGBC11TKB	stomach	carcinoma			Gastric:Carcinoma											2775.82	381.417	1	0	0	0.631406	Predicted sensitive	74	9	220	128	194	301	1173	223	163	27	382	213	249	206	280	2350	36	484	506	5	215	3	40	92	164	122
SUDHL4_HAEMATOPOIETIC_AND_LYMPHOID_TISSUE	SUDHL4	haematopoietic_and_lymphoid_tissue	lymphoid_neoplasm	diffuse_large_B_cell_lymphoma		Lymphoma:NH_B_cell	0.05	-2.35369	Resistant							Resistant	987.346	477.764	1	0	0	0.590942	Predicted sensitive	84	2	236	9	172	216	946	115	60	12	478	246	363	286	102	332	37	393	14	7	233	774	63	11	146	121
TE617T_SOFT_TISSUE	TE617T	soft_tissue	rhabdomyosarcoma			Soft_Tissue:Sarcoma_Rhabdoid	0.05	-2.27175	Resistant							Resistant	3021.54	1.5961	1	0	0	0.00967902	Predicted resistant	191	21	454	13	126	248	1895	53	104	12	2	266	464	198	39	8133	15	397	46	15	127	6	84	9	294	92
HT1080_SOFT_TISSUE	HT1080	soft_tissue	fibrosarcoma			Soft_Tissue:Sarcoma_Fibro	0.05	36.0034	Resistant							Resistant	4656.68	297.417	1	0	0	0.78531	Predicted sensitive	116	3	496	45	314	731	2826	1	62	7	298	17	307	155	88	245	152	1072	800	7	105	813	43	418	245	71
SKMEL31_SKIN	SKMEL31	skin	malignant_melanoma			Skin:Melanoma											4659.56	390.66	1	0	0	0.544684	Predicted sensitive	52	16	54	49	122	141	869	9	39	18	391	6	354	148	143	1032	17	476	438	10	164	51	37	5146	254	57
CJM_SKIN	CJM	skin	malignant_melanoma			Skin:Melanoma											5060.88	922.466	1	1	1	0.852636	Predicted sensitive	67	18	59	15	368	486	1312	48	201	18	923	625	269	180	104	1344	48	903	383	7	218	3	35	3543	1144	41
KG1C_CENTRAL_NERVOUS_SYSTEM	KG1C	central_nervous_system	glioma	astrocytoma_Grade_IV	glioblastoma_multiforme	CNS:Glioma_HighGrade											6095.79	439.643	1	0	0	0.373938	Predicted resistant	55	24	368	17	556	441	2423	840	82	16	440	3	1119	134	155	4009	17	726	1729	18	120	15	23	10176	346	62
SNU16_STOMACH	SNU16	stomach	carcinoma	undifferentiated_adenocarcinoma		Gastric:Carcinoma	5.03659e-05	91.5329	Sensitive							Sensitive	516.077	581.061	0	1	0	0.526911	Predicted sensitive	65	4	432	45	126	431	692	16	60	30	582	1	360	186	17	2637	48	484	48	9	114	3	27	12	370	83
GSU_STOMACH	GSU	stomach	carcinoma	adenocarcinoma		Gastric:Carcinoma				0.0064998	98	Sensitive				Sensitive	2122.11	603.414	1	1	1	0.795586	Predicted sensitive	125	38	385	22	357	356	1147	10	153	49	604	16	404	173	54	1680	52	539	1030	8	199	3	18	64	263	67
SR786_HAEMATOPOIETIC_AND_LYMPHOID_TISSUE	SR786	haematopoietic_and_lymphoid_tissue	lymphoid_neoplasm	anaplastic_large_cell_lymphoma		Lymphoma:NH_T_cell	0.05	-1.93438	Resistant							Resistant	2397.59	1131.52	1	1	1	0.182449	Predicted resistant	66	38	160	67	109	17	1832	580	171	31	1132	88	1277	229	188	43	81	482	701	75	162	288	156	20	343	128
IGROV1_OVARY	IGROV1	ovary	carcinoma	adenocarcinoma		Ovary:Carcinoma	0.05	-1.91711	Resistant	10	0	Resistant				Resistant	785.707	289.786	0	0	0	0.0528849	Predicted resistant	122	6	346	7	705	90	1832	474	72	14	290	43	541	28	51	642	111	680	861	20	217	6	54	22	479	36
SNU1_STOMACH	SNU1	stomach	carcinoma	undifferentiated_adenocarcinoma		Gastric:Carcinoma	0.000102263	80.1016	Sensitive							Sensitive	2504.63	474.541	1	0	0	0.377304	Predicted resistant	207	17	297	172	151	228	716	8	96	26	475	96	444	299	73	368	44	520	515	19	162	3	41	18	223	76
SEM_HAEMATOPOIETIC_AND_LYMPHOID_TISSUE	SEM	haematopoietic_and_lymphoid_tissue	lymphoid_neoplasm	acute_lymphoblastic_B_cell_leukaemia		Leukemia:ALL	3.51803e-05	87.1117	Sensitive				0.0001	3.31754	Resistant	Intermediate	212.127	830.331	0	1	0	0.296956	Predicted resistant	97	18	202	1229	85	1231	549	6	35	37	831	709	345	261	104	1970	83	426	26	21	217	455	85	21	210	118
CAL62_THYROID	CAL62	thyroid	carcinoma	anaplastic_carcinoma		Thyroid											955.347	336.27	1	0	0	0.130396	Predicted resistant	35	11	148	54	348	202	1189	36	118	19	337	14	386	188	205	2992	55	589	132	9	131	441	36	99	785	72
YD8_UPPER_AERODIGESTIVE_TRACT	YD8	upper_aerodigestive_tract	carcinoma	squamous_cell_carcinoma		Upper_Aerodigestive_Tract											521.089	556.879	0	1	0	0.106784	Predicted resistant	64	15	208	22	304	271	1949	17	119	56	557	441	624	94	164	4096	107	2032	132	23	74	138	18	319	645	96
CL34_LARGE_INTESTINE	CL34	large_intestine	carcinoma	adenocarcinoma		Colorectal:Carcinoma				1e-05	98	Sensitive				Sensitive	1452.01	884.348	1	1	1	0.831641	Predicted sensitive	57	5	131	66	157	312	900	78	114	70	885	131	346	215	77	1314	32	328	305	14	225	4	21	197	300	78
COLO677_LUNG	COLO677	haematopoietic_and_lymphoid_tissue	lymphoid_neoplasm	plasma_cell_myeloma		Lymphoma:Multiple_Myeloma							0.0001	9.10405	Resistant	Resistant	1650.93	1243.51	1	1	1	0.180412	Predicted resistant	49	16	79	2574	183	128	1068	1272	84	139	1244	227	1613	97	777	101	50	231	847	25	163	237	49	19	748	98
639V_URINARY_TRACT	639V	urinary_tract	carcinoma	transitional_cell_carcinoma		Bladder											719.396	434.918	0	0	0	0.389807	Predicted resistant	97	73	218	52	267	408	1006	34	127	20	435	443	208	164	91	6938	67	542	67	17	78	170	47	37	602	74
UMUC3_URINARY_TRACT	UMUC3	urinary_tract	carcinoma	transitional_cell_carcinoma		Bladder	0.05	45.7311	Resistant							Resistant	1413.15	874.068	1	1	1	0.421134	Predicted resistant	73	19	180	65	153	301	3376	2060	85	14	874	19	733	159	122	120	63	839	579	15	126	628	39	1470	186	72
SHSY5Y_AUTONOMIC_GANGLIA	SHSY5Y	autonomic_ganglia	neuroblastoma			CNS:Neuroblastoma																0.0464121	Predicted resistant	97	7	155	687	83	309	1131	5	145	9	16	32	189	122	205	2015	17	176	32	12	450	342	70	5	146	123
U138MG_CENTRAL_NERVOUS_SYSTEM	U138MG	central_nervous_system	glioma	astrocytoma_Grade_IV	glioblastoma_multiforme	CNS:Glioma_HighGrade																0.8141	Predicted sensitive	274	39	214	73	406	115	2213	87	57	4	453	15	978	130	412	3319	26	443	492	2	329	1	26	2651	557	52
SNU216_STOMACH	SNU216	stomach	carcinoma			Gastric:Carcinoma	0.0080958	96.1456	Sensitive	10	5	Resistant				Intermediate	307.783	641.663	0	1	0	0.288958	Predicted resistant	25	18	241	4	518	555	1983	192	71	22	642	270	880	89	98	2742	194	466	36	15	119	5	30	60	1331	87
CAS1_CENTRAL_NERVOUS_SYSTEM	CAS1	central_nervous_system	glioma	astrocytoma_Grade_IV	glioblastoma_multiforme	CNS:Glioma_HighGrade	0.05	-1.899	Resistant							Resistant	1767.58	340.495	1	0	0	0.523032	Predicted sensitive	146	3	252	36	182	895	2254	232	70	16	341	31	131	112	246	1545	27	426	1184	12	74	2	32	3037	356	89
BV173_HAEMATOPOIETIC_AND_LYMPHOID_TISSUE	BV173	haematopoietic_and_lymphoid_tissue	haematopoietic_neoplasm	blast_phase_chronic_myeloid_leukaemia		Leukemia:CML	0.05	-1.81343	Resistant							Resistant	13.1538	504.764	0	1	0	0.0691774	Predicted resistant	55	38	368	280	192	246	774	3	30	77	505	17	183	268	121	25	24	161	535	17	540	1027	95	7	362	87
KO52_HAEMATOPOIETIC_AND_LYMPHOID_TISSUE	KO52	haematopoietic_and_lymphoid_tissue	haematopoietic_neoplasm	acute_myeloid_leukaemia	M2	Leukemia:AML	0.05	-1.79588	Resistant							Resistant	167.548	990.97	0	1	0	0.269425	Predicted resistant	68	6	252	668	84	752	1363	46	99	59	991	31	704	162	91	1664	44	406	82	4	188	498	95	3431	153	101
SET2_HAEMATOPOIETIC_AND_LYMPHOID_TISSUE	SET2	haematopoietic_and_lymphoid_tissue	haematopoietic_neoplasm	essential_thrombocythaemia		Leukemia:MPD	0.05	-1.64561	Resistant							Resistant	234.533	1029.75	0	1	0	0.25735	Predicted resistant	44	3	155	93	300	535	747	29	216	244	1030	11	998	195	138	443	39	224	35	15	237	459	38	73	335	165
NCIH2106_LUNG	NCIH2106	lung	carcinoma	non_small_cell_carcinoma		Lung:NSCLC_Others	0.05	-1.27516	Resistant							Resistant	8.1289	51.8022	0	0	0	0.0041627	Predicted resistant	68	5	165	455	278	600	800	9	129	3	52	879	111	182	215	465	11	253	19	4	120	415	41	11	252	447
HCC827_LUNG	HCC827	lung	carcinoma	adenocarcinoma		Lung:NSCLC_Adeno	0.05	-1.23625	Resistant							Resistant	1482.4	735.914	1	1	1	0.0491037	Predicted resistant	47	30	76	8	362	28	1825	659	69	56	736	1207	855	153	168	826	39	705	257	5	170	4	15	440	586	26
8MGBA_CENTRAL_NERVOUS_SYSTEM	8MGBA	central_nervous_system	glioma	astrocytoma_Grade_IV	glioblastoma_multiforme	CNS:Glioma_HighGrade	0.05	-1.20907	Resistant							Resistant	732.243	651.45	0	1	0	0.0969093	Predicted resistant	66	5	172	39	138	349	762	116	60	20	652	971	622	59	144	2297	21	693	364	5	160	58	21	371	478	33
MOLM16_HAEMATOPOIETIC_AND_LYMPHOID_TISSUE	MOLM16	haematopoietic_and_lymphoid_tissue	haematopoietic_neoplasm	acute_myeloid_leukaemia	M0	Leukemia:AML	0.05	-1.11057	Resistant							Resistant	353.35	1013.63	0	1	0	0.0776368	Predicted resistant	54	3	151	47	87	335	793	22	666	129	1014	2260	1812	297	50	56	30	283	7	8	151	166	12	21	449	199
BFTC909_KIDNEY	BFTC909	kidney	carcinoma			Kidney:Carcinoma	0.05	-0.305054	Resistant	10	9	Resistant				Resistant	1487	464.296	1	0	0	0.0420778	Predicted resistant	37	26	97	41	233	143	504	58	95	1	465	7	2445	161	215	224	30	206	761	8	152	1060	63	984	608	33
SUM52_BREAST	SUM52	breast	carcinoma			Breast:Carcinoma	0.05	-28.5621	Resistant							Resistant
EVSAT_BREAST	EVSAT	breast	carcinoma			Breast:Carcinoma											151.887	321.122	0	0	0
SUM52PE_BREAST	SUM52PE	breast	carcinoma			Breast:Carcinoma	0.05	-21.6938	Resistant							Resistant
NCIH3255_LUNG	NCIH3255	lung	carcinoma	adenocarcinoma		Lung:NSCLC_Adeno	0.05	16.343	Resistant							Resistant	329.348	762.436	0	1	0
MEL285_SKIN	MEL285	skin	malignant_melanoma			Skin:Melanoma	0.05	-16.3765	Resistant							Resistant
OVISE_OVARY	OVISE	ovary	carcinoma	clear_cell_carcinoma		Ovary:Carcinoma	0.05	7.43239	Resistant	10	0	Resistant				Resistant	1200.15	772.661	1	1	1
WS1_SKIN	WS1	skin	normal			Skin:Normal	0.05	-15.7121	Resistant							Resistant
htk_haematopoietic_and_lymphoid_tissue	htk	haematopoietic_and_lymphoid_tissue	lymphoid_neoplasm	plasma_cell_myeloma		Lymphoma:Multiple_Myeloma	0.05	-2.48407	Resistant							Resistant	2446.54	387.607	1	0	0
COLO775_HAEMATOPOIETIC_AND_LYMPHOID_TISSUE	COLO775	haematopoietic_and_lymphoid_tissue	haematopoietic_neoplasm	chronic_myeloid_leukaemia		Leukemia:CML	6.58485e-05	85.3292	Sensitive							Sensitive	501.887	1559.3	0	1	0
mel202_skin	mel202	skin	malignant_melanoma			Skin:Melanoma	0.05	-15.4831	Resistant							Resistant
KURAMOCHI_OVARY	KURAMOCHI	ovary	carcinoma	undifferentiated_carcinoma		Ovary:Carcinoma	0.05	-14.2307	Resistant							Resistant	348.976	810.985	0	1	0
CCRFCEM_HAEMATOPOIETIC_AND_LYMPHOID_TISSUE	CCRFCEM	haematopoietic_and_lymphoid_tissue	lymphoid_neoplasm	acute_lymphoblastic_T_cell_leukaemia		Leukemia:ALL	0.05	-13.7751	Resistant	10	47	Resistant				Resistant
HRT18_LARGE_INTESTINE	HRT18	large_intestine	carcinoma	adenocarcinoma		Colorectal:Carcinoma	0.05	-2.57642	Resistant							Resistant
t778_soft_tissue	t778	soft_tissue	sarcoma	liposarcoma		Soft_Tissue:Sarcoma_Lipo	0.05	-11.7077	Resistant							Resistant
NCIH2330_LUNG	NCIH2330	lung	carcinoma	small_cell_carcinoma		Lung:SCLC	0.05	-11.0201	Resistant							Resistant
TCCSUP_URINARY_TRACT	TCCSUP	urinary_tract	carcinoma	transitional_cell_carcinoma		Bladder							0.0001	10.7355	Resistant	Resistant	2255.68	515.328	1	1	1
omm23_skin	omm23	skin	malignant_melanoma			Skin:Melanoma	0.05	-7.47928	Resistant							Resistant
HLFA_LUNG	HLFA	lung	squamous cell carcinoma	squamous_cell_carcinoma		Lung:NSCLC_Squamous											1463.98	327.516	1	0	0	0.0958525	Predicted resistant	113	54	508	18	155	395	1933	29	111	23	328	286	559	174	107	3749	54	541	1587	3	146	16	38	100	372	45
A2058_SKIN	A2058	skin	malignant_melanoma			Skin:Melanoma	0.000159367	77.0976	Sensitive				0.0001	42.184	Resistant	Intermediate	1344.39	392.912	1	0	0
KP1NL_PANCREAS	KP1NL	pancreas	carcinoma	ductal_carcinoma		Pancreas	0.05	46.1577	Resistant							Resistant	747.487	892.933	0	1	0
KP1N_PANCREAS	KP1N	pancreas	carcinoma	ductal_carcinoma		Pancreas	0.0012321	50.0952	Intermediate							Intermediate	622.5	896.967	0	1	0
GRM_SKIN	GRM	skin	malignant_melanoma			Skin:Melanoma	7.18522e-05	95.2298	Sensitive							Sensitive	2406.32	1183.11	1	1	1
RKN_SOFT_TISSUE	RKN	soft_tissue	sarcoma			Soft_Tissue:Sarcoma_Leiomyo	0.000316114	73.0208	Sensitive	0.0122113	85	Sensitive	0.0001	38.0643	Resistant	Sensitive	1230.34	561.865	1	1	1	0.39468	Predicted resistant	119	22	243	16	282	533	1858	29	69	17	562	17	554	79	129	6324	45	1220	151	3	85	10	20	14993	552	51
U118MG_CENTRAL_NERVOUS_SYSTEM	U118MG	central_nervous_system	glioma	astrocytoma		CNS:Glioma	0.05	36.2505	Resistant							Resistant	1109.23	434.195	1	0	0
CORL279_LUNG	CORL279	lung	carcinoma	small_cell_carcinoma		Lung:SCLC	0.05	0.24339	Resistant							Resistant	1.4583	209.648	0	0	0
VMRCLCD_LUNG	VMRCLCD	lung	carcinoma	adenocarcinoma		Lung:NSCLC_Adeno							0.0001	3.05029	Resistant	Resistant	107.369	386.414	0	0	0
59M_OVARY	59M	ovary	carcinoma			Ovary:Carcinoma	0.05	46.5208	Resistant							Resistant	718.342	642.559	0	1	0
REN_PLEURA	REN	pleura	mesothelioma	epithelial		Lung:Mesothelioma				0.0001945	100	Sensitive				Sensitive
ME180_CERVIX	ME180	cervix	carcinoma			Cervix:Carcinoma				0.0077667	62.5	Intermediate				Intermediate
MOLT3_HAEMATOPOIETIC_AND_LYMPHOID_TISSUE	MOLT3	haematopoietic_and_lymphoid_tissue	lymphoid_neoplasm	acute_lymphoblastic_T_cell_leukaemia		Leukemia:ALL				1.5	60	Intermediate				Intermediate
Z138_HAEMATOPOIETIC_AND_LYMPHOID_TISSUE	Z138	haematopoietic_and_lymphoid_tissue	lymphoid_neoplasm	mantle_cell_lymphoma		Lymphoma:NH_B_cell	9.00115e-05	91.7089	Sensitive							Sensitive
184B5_BREAST	184B5	breast	carcinoma			Breast:Normal				10	41.45	Resistant				Resistant
SiHa_CERVIX	SiHa	cervix	carcinoma	squamous_cell_carcinoma		Cervix:Carcinoma_Squamous				10	0	Resistant				Resistant
BE13_HAEMATOPOIETIC_AND_LYMPHOID_TISSUE	BE13	haematopoietic_and_lymphoid_tissue	lymphoid_neoplasm	acute_lymphoblastic_T_cell_leukaemia		Leukemia:ALL				10	0	Resistant				Resistant
HSB2_HAEMATOPOIETIC_AND_LYMPHOID_TISSUE	HSB2	haematopoietic_and_lymphoid_tissue	lymphoid_neoplasm	acute_lymphoblastic_T_cell_leukaemia		Leukemia:ALL				10	0	Resistant				Resistant
JM_HAEMATOPOIETIC_AND_LYMPHOID_TISSUE	JM	haematopoietic_and_lymphoid_tissue	lymphoid_neoplasm	acute_lymphoblastic_T_cell_leukaemia		Leukemia:ALL				10	17	Resistant				Resistant
SKW3_HAEMATOPOIETIC_AND_LYMPHOID_TISSUE	SKW3	haematopoietic_and_lymphoid_tissue	lymphoid_neoplasm	chronic_lymphocytic_leukaemia-small_lymphocytic_lymphoma		Leukemia:CLL				10	33	Resistant				Resistant
U2932_HAEMATOPOIETIC_AND_LYMPHOID_TISSUE	U2932	haematopoietic_and_lymphoid_tissue	lymphoid_neoplasm	diffuse_large_B_cell_lymphoma		Lymphoma:NH_B_cell							0.0001	16.0508	Resistant	Resistant
OE21_OESOPHAGUS	OE21	oesophagus	carcinoma	squamous_cell_carcinoma		Oesophagus:Carcinoma							0.0001	17.6236	Resistant	Resistant
LRK_PLEURA	LRK	pleura	mesothelioma	epithelial		Lung:Mesothelioma				10	0	Resistant				Resistant
OMM25_SKIN	OMM25	skin	malignant_melanoma			Skin:Melanoma	0.05	3.15867	Resistant							Resistant
NCIH2073_LUNG	NCIH2073	lung	carcinoma	adenocarcinoma		Lung:NSCLC_Adeno	0.05	-0.356001	Resistant							Resistant
lp6_soft_tissue	lp6	soft_tissue	sarcoma			Soft_Tissue:Sarcoma_Lipo	0.05	24.7003	Resistant							Resistant
SW872_SOFT_TISSUE	SW872	soft_tissue	liposarcoma			Soft_Tissue:Sarcoma_Lipo							0.0001	45.1704	Resistant	Resistant
NCIH1993_LUNG	NCIH1993	lung	carcinoma	adenocarcinoma		Lung:NSCLC_Adeno
[truncated: 144 more columns]

## Sheet: Data S2 All Genes 
Differential analysis for all genes vs. DR5NB1-tetra sensitivity
genes	ttest p.value	adj.p.value (FDR)	fold-change
TNFRSF10B	6.11641e-16	3.68697e-12	1.66834
CASP8	6.33957e-13	1.91075e-09	1.28
PARP4	4.44296e-10	8.92739e-07	1.28593
CASP4	3.57486e-08	5.38731e-05	1.54008
STAT6	1.24992e-07	0.000150691	1.44667
ANTXR2	3.48376e-07	0.000350002	2.79
BID	8.67493e-07	0.000747035	1.34579
TSPAN3	1.99785e-06	0.00150538	1.26029
GBP3	3.51913e-06	0.00235704	1.82796
ZBTB7A	4.51344e-06	0.0027207	1.19858
SLC12A7	7.65544e-06	0.00395388	1.37107
MLKL	7.87103e-06	0.00395388	1.66667
ADAP1	8.90548e-06	0.0041294	1.75
DNPEP	9.62159e-06	0.00414278	1.14982
DTX3L	1.73889e-05	0.00664715	1.23885
MLXIP	1.79623e-05	0.00664715	1.21505
CD97	1.88886e-05	0.00664715	1.40397
TMEM106B	1.98488e-05	0.00664715	1.12989
DCP1B	2.25434e-05	0.00686931	1.159
RFC4	2.27913e-05	0.00686931	0.82987
PSME1	2.49425e-05	0.00715969	1.21202
RNF19A	2.84896e-05	0.00780614	0.837953
OSBPL3	3.07434e-05	0.00805744	1.33962
LGALS8	3.31052e-05	0.00822337	1.34286
CLIC1	3.41049e-05	0.00822337	1.14122
LONRF3	3.8603e-05	0.00894996	1.76136
SPRED1	4.01417e-05	0.00896201	1.3587
DUSP6	4.45579e-05	0.00929329	1.45633
RAB27B	4.57348e-05	0.00929329	2.32639
SP100	4.62506e-05	0.00929329	1.14917
S100A4	4.96383e-05	0.00965225	4.46494
RPS6KA3	5.37437e-05	0.010124	1.35511
NAT1	5.85059e-05	0.0105837	1.12274
TGFBR2	5.96959e-05	0.0105837	1.53651
SLC25A37	7.26419e-05	0.012511	1.24887
SYNJ2	8.17906e-05	0.0131424	1.45946
LGALS3BP	8.28327e-05	0.0131424	1.80513
AVL9	8.28487e-05	0.0131424	1.19277
NMI	9.54004e-05	0.0147455	1.40545
ARFIP1	0.000102623	0.0152046	1.19613
TSR2	0.000103415	0.0152046	0.785965
MYD88	0.000109452	0.015709	1.16731
MLEC	0.000114378	0.0160341	1.19393
MLPH	0.000126615	0.0173462	6.3038
COX17	0.000140145	0.0187732	0.805195
TRIM25	0.000146137	0.0191503	1.13839
TRIM38	0.000152458	0.0195535	1.083
LDLR	0.000158851	0.019949	1.33654
HMGA1	0.000176382	0.0216986	1.37826
TSPO	0.000181811	0.0219191	1.35806
PHC2	0.000211599	0.0247137	1.27241
CIB1	0.000218017	0.0247137	1.25366
LASP1	0.00021878	0.0247137	1.23048
SETD7	0.000224819	0.0247137	1.16637
MED27	0.00022549	0.0247137	0.833333
CTSC	0.000235566	0.0251165	1.28201
MICAL2	0.000241177	0.0251165	1.97938
GTF2E2	0.000241665	0.0251165	1.14989
NT5E	0.000251596	0.0257054	4
ACO1	0.00025595	0.0257145	1.21201
FUNDC2	0.000262896	0.0259793	0.877749
TMEM87B	0.000274394	0.0266781	1.21596
S100A6	0.000288747	0.027628	1.75741
FYTTD1	0.00030119	0.0283684	0.858247
ALS2	0.000330674	0.0306662	1.16279
CANT1	0.000359527	0.0328368	1.2
GALE	0.00038764	0.0342615	1.35676
ARHGAP12	0.000391477	0.0342615	1.23502
QSOX1	0.000400779	0.0342615	1.47541
C5ORF37	0.000401255	0.0342615	0.913043
REPIN1	0.000408412	0.0342615	1.24836
LOC158960	0.000414825	0.0342615	0.898936
UPF3B	0.000414912	0.0342615	0.850789
DCTN3	0.000479426	0.0390538	0.861352
ACY1	0.000486859	0.0391305	1.19255
IER3	0.000518722	0.0410551	1.76868
ELMO2	0.00052841	0.0410551	0.853383
ARHGAP18	0.000531237	0.0410551	1.49402
C8ORF38	0.000548462	0.0418075	0.847407
ZNF639	0.00055804	0.0418075	0.88254
SH3BGRL3	0.000561779	0.0418075	1.35253
SKA2	0.000570123	0.041911	0.783228
SEL1L3	0.000580345	0.041983	2.26776
PDRG1	0.000585031	0.041983	0.890026
NDUFB6	0.000615102	0.0436216	0.883515
BEX4	0.000623015	0.043669	0.354167
RASA1	0.000632544	0.0438273	1.31245
CREM	0.000652964	0.0440066	0.801887
PSMB8	0.000656461	0.0440066	1.42342
ACSL5	0.000657033	0.0440066	3.8913
AKAP11	0.000665074	0.0440557	1.11905
SMAD3	0.000692392	0.0453667	1.40385
GAK	0.000705193	0.0457086	1.16667
PIN4	0.000726272	0.0465741	0.874859
AKR1C3	0.000751211	0.0473159	3.25833
DMTF1	0.000762295	0.0473159	0.88588
COASY	0.000764446	0.0473159	1.20994
ABCC3	0.000770158	0.0473159	3.75926
FXYD5	0.000777086	0.0473159	1.23021
SNX2	0.000830183	0.0500434	0.871795
CORO1B	0.000850529	0.0507623	1.15207
TRIP12	0.000892656	0.0527542	1.12578
ZNF43	0.000903207	0.0528595	0.632
CBFA2T2	0.000943405	0.0546812	0.852
VBP1	0.000960794	0.0551588	0.894429
CLCN3	0.000976435	0.0555279	1.1802
LRP10	0.000999138	0.0562879	1.21142
MVP	0.00100929	0.0563332	1.74242
CDC14B	0.0010534	0.0582559	1.37991
HPCAL1	0.00107214	0.0585643	1.52347
VPS37B	0.00107841	0.0585643	1.45652
TNFRSF1A	0.00110886	0.0596807	1.3
MGAT4B	0.00113262	0.0604196	1.2443
NDUFA2	0.00115423	0.0606276	0.875951
PRAGMIN	0.00116498	0.0606276	1.48472
TIMM17B	0.00117021	0.0606276	0.845283
C6ORF129	0.00118111	0.0606276	0.78934
METAP1	0.00120603	0.0606276	1.06845
MDC1	0.00120797	0.0606276	0.805755
LAS1L	0.00121597	0.0606276	0.913183
PTPRJ	0.00121698	0.0606276	1.55924
CETN3	0.00123547	0.0610445	0.931269
GPN3	0.00126632	0.0620598	0.900114
STAMBPL1	0.00128272	0.0623568	1.55197
FOSL1	0.00131064	0.0632043	2.07914
SDCBP	0.00132653	0.0634631	1.14711
APEH	0.00135529	0.0642126	1.13474
C1ORF93	0.00136351	0.0642126	1.24681
TMSB15A	0.0013955	0.0652101	0.386667
C20ORF112	0.00140836	0.0653045	1.32653
FERMT1	0.00152327	0.0700937	1.68243
MDM1	0.00154063	0.0703555	0.873303
KIFC1	0.00157928	0.0711753	0.774194
SLC4A1AP	0.0015822	0.0711753	0.931323
ZCCHC10	0.00159768	0.0713392	0.876404
NKAP	0.00163733	0.0723281	0.897527
PAIP2	0.00164382	0.0723281	0.882353
HSD17B11	0.00167726	0.0729704	1.4359
KIAA0226	0.00168487	0.0729704	0.887446
PLEKHB2	0.00169473	0.0729704	1.05107
PRKCA	0.00172877	0.0734364	1.58159
STAG3L4	0.00172992	0.0734364	0.883721
RAC2	0.00175276	0.073681	2.60907
POLR2K	0.00176013	0.073681	0.933858
FTL	0.00177536	0.0738059	1.24565
CDKN2A	0.00187282	0.0767714	0.210084
CMTM7	0.00187735	0.0767714	1.26834
MYO5A	0.0018849	0.0767714	0.837209
NVL	0.0019229	0.0775009	0.889423
HDLBP	0.00192852	0.0775009	1.20393
TMSB10	0.00194791	0.0777615	1.11673
DZIP3	0.00202258	0.0801993	0.794872
BEX2	0.00205916	0.0801993	0.512821
ETV5	0.00206442	0.0801993	1.30811
SCPEP1	0.00207081	0.0801993	0.808989
KRCC1	0.0020755	0.0801993	1.23828
RETSAT	0.00208957	0.0802287	1.19072
TNRC18	0.0021426	0.0817442	1.24242
MTCP1NB	0.0021593	0.0818631	0.803526
PKM2	0.00229303	0.0859303	1.24254
PLEKHA2	0.00229509	0.0859303	1.35714
TRIM16	0.00232903	0.0863543	1.26446
BTF3L4	0.0023373	0.0863543	0.890261
IL8	0.00234939	0.0863543	3.10833
COX6C	0.00241044	0.0880615	0.890234
COMMD2	0.002446	0.0883809	0.869318
DAP	0.00244851	0.0883809	1.30515
ZDHHC20	0.00250962	0.0900476	1.28944
DHRS3	0.0025293	0.0902168	2.83333
ITGA6	0.00255265	0.0905141	1.44868
MAP3K5	0.00261204	0.0920782	1.5
DDX60	0.00271704	0.0946412	1.43902
HDGFRP3	0.0027402	0.0946412	0.763423
CTSB	0.0027455	0.0946412	1.47929
FAM114A2	0.00276742	0.0946412	0.907317
NAPEPLD	0.00277397	0.0946412	1.21154
C1ORF52	0.00278424	0.0946412	0.918782
SH3KBP1	0.00279465	0.0946412	1.1883
FIGN	0.0029492	0.099317	0.618705
PYGB	0.00297595	0.0996611	1.38312
FAM108C1	0.00299782	0.099839	1.34872
KHNYN	0.00307729	0.101922	1.14844
ZNF542	0.00313791	0.103363	0.265823
CP110	0.00317951	0.104163	0.842623
SERPINE2	0.00321465	0.104354	2.11679
S100A16	0.00321994	0.104354	1.61748
WDR47	0.00328817	0.10594	0.884444
LMO7	0.00331802	0.10594	1.80978
RALB	0.00332387	0.10594	1.15465
ZBTB10	0.00333919	0.10594	0.806452
TBK1	0.0034405	0.108583	0.946636
C2ORF76	0.00354239	0.111216	0.836634
C17ORF75	0.00363062	0.113396	0.865591
MRPL47	0.00367642	0.114231	0.885926
GSTP1	0.00370115	0.114231	1.01665
RPS24	0.0037142	0.114231	1.27027
VPS33B	0.00380978	0.116575	1.09913
NFE2L2	0.00387105	0.116875	1.21832
ELF1	0.0038772	0.116875	1.17778
SLC22A18	0.00390348	0.116875	1.24183
INPP1	0.00393828	0.116875	1.28794
ENTPD4	0.00394304	0.116875	1.13985
GSTK1	0.00395607	0.116875	1.16849
MAGOH	0.00397883	0.116875	0.861925
UXS1	0.00398342	0.116875	1.16759
ACADVL	0.00399409	0.116875	1.11345
ARPP19	0.00405216	0.118002	0.948328
VEGFA	0.00412317	0.119418	1.32959
TIMP1	0.00414041	0.119418	1.27041
SGTB	0.00418431	0.11966	0.760638
PDE12	0.00421668	0.11966	1.13454
ATP6V1C1	0.00421687	0.11966	0.810651
ZHX1	0.0042282	0.11966	0.869681
HEBP1	0.00426978	0.120272	1.28623
CYBA	0.00430056	0.120576	1.34075
PROCR	0.00440806	0.123018	1.61364
UBAC2	0.00446681	0.123669	1.10825
ANKHD1	0.00447243	0.123669	0.850694
DUSP4	0.00451394	0.124247	2.97945
SPTBN1	0.00454041	0.124407	1.2971
NDUFB5	0.00456679	0.124564	0.903946
MAEA	0.00462266	0.12552	1.06728
SIRT7	0.00464669	0.125607	1.07905
ZNF75A	0.00470884	0.126718	0.862348
ANAPC1	0.00488532	0.130883	1.09653
ZNF518B	0.00497743	0.132761	0.60804
PIP5K1A	0.00511093	0.135721	0.779221
MPG	0.00514121	0.135926	1.12635
CAB39	0.00518391	0.135935	1.12999
ACTR6	0.00518663	0.135935	0.940716
CENPA	0.00522598	0.136373	0.880583
ZBTB8OS	0.00527515	0.137063	0.981663
EML4	0.00532733	0.137305	1.21429
PPAP2C	0.00534426	0.137305	2.12162
NANOS1	0.00535281	0.137305	0.619632
SMAGP	0.00540173	0.137478	1.75107
MTERFD1	0.00540517	0.137478	0.892989
STMN1	0.00543466	0.137648	0.842907
IL10RB	0.00549693	0.138642	1.17192
MOCOS	0.00558388	0.140248	1.99242
CBL	0.00563237	0.140383	0.863158
MLX	0.00563583	0.140383	1.04927
GATA6	0.00571814	0.141783	1.45946
HSPA14	0.00573907	0.141783	0.910394
VPS4B	0.00582798	0.143345	1.18857
TUBA1A	0.0058935	0.143345	0.761517
SUCLG2	0.00590858	0.143345	1.20408
ABR	0.00592308	0.143345	1.40351
C16ORF87	0.00594461	0.143345	0.81
BICD1	0.00594496	0.143345	0.776256
GALNT7	0.00603242	0.144874	1.16299
GCC2	0.00609178	0.145719	1.11285
PVRL3	0.00620249	0.147493	1.76106
SERPINB5	0.00623356	0.147493	1.66667
RIOK1	0.00623933	0.147493	0.885093
S100P	0.00630053	0.148228	4.54545
SF3B14	0.0063196	0.148228	0.925667
PTTG1	0.00635503	0.148481	0.913903
CEP78	0.00640218	0.149005	0.887608
AMOTL1	0.00648226	0.149938	0.702929
KRT18	0.00649199	0.149938	1.62127
PIH1D1	0.00670193	0.154058	1.02375
MAD2L2	0.0067424	0.154058	0.843284
UGGT1	0.00674709	0.154058	1.08584
FAM57A	0.00682055	0.155148	1.34356
ZNF511	0.00690466	0.156471	1.21145
AFF1	0.0069774	0.157527	1.19493
TRAF3	0.00710136	0.158617	1.12994
GNB4	0.00710294	0.158617	0.860972
ACVR1	0.00712113	0.158617	1.14338
FBXO28	0.00713179	0.158617	1.11954
NUP153	0.00715724	0.158617	0.92813
C14ORF129	0.00731642	0.160921	1.0795
EPHA2	0.00734624	0.160921	1.44231
PARP12	0.00735664	0.160921	1.1989
HRAS	0.00736796	0.160921	0.9
C12ORF73	0.00743099	0.161598	0.898824
PSMD10	0.00745753	0.161598	0.840731
TMEM2	0.0074794	0.161598	1.52593
CTDSP1	0.00760009	0.163619	1.11297
MPDZ	0.00763057	0.163627	0.666667
CD44	0.00766523	0.163627	1.4381
PHLDA1	0.00768894	0.163627	1.93435
UBE2E2	0.00770903	0.163627	0.819121
IRF2BP2	0.00777441	0.164436	1.25455
KIAA1430	0.00788546	0.165783	1.10065
TMEM184C	0.00789312	0.165783	1.13962
FLNB	0.00796405	0.16602	1.55108
ANXA4	0.00798088	0.16602	1.11496
SMC4	0.007987	0.16602	0.878299
S100A10	0.00809187	0.167182	1.18537
SRA1	0.00811142	0.167182	0.836559
ITPRIPL2	0.00813175	0.167182	1.07362
SWAP70	0.00815385	0.167182	0.79661
PSME2	0.00820212	0.167315	1.10902
PRPS1	0.00831738	0.167315	0.848392
SLC16A3	0.00833523	0.167315	2.03361
WIPF2	0.0083412	0.167315	1.13165
SFRS3	0.00835356	0.167315	0.84434
USP1	0.00837638	0.167315	0.901068
IFI27	0.008393	0.167315	1.58333
KATNA1	0.00843657	0.167315	0.833333
KLF3	0.0084476	0.167315	1.34074
C5ORF62	0.00846855	0.167315	1.12409
ADAM9	0.00847443	0.167315	1.24299
CAPN1	0.00849343	0.167315	1.22917
SLC35D2	0.0085401	0.167686	1.11719
SCD	0.00863996	0.168178	1.18731
FAM76A	0.0086467	0.168178	0.892308
FOXK1	0.00864882	0.168178	1.19635
FZD7	0.00887653	0.172051	1.46789
AMIGO2	0.00913812	0.176553	2.3037
TAF7	0.00928284	0.178776	0.90998
TM4SF1	0.0093823	0.179044	1.42934
CRNDE	0.0094062	0.179044	0.843206
PLEKHF2	0.00942161	0.179044	0.797059
SSX2IP	0.0094483	0.179044	0.855297
C19ORF63	0.00947278	0.179044	1.14458
CAPG	0.00953847	0.179044	1.74766
SLK	0.00957206	0.179044	1.1226
GTF3C3	0.00957789	0.179044	1.08458
CDC25C	0.0096114	0.179044	0.896714
SNX9	0.00966507	0.179044	1.18062
NUB1	0.00967145	0.179044	1.05634
AK3	0.00967848	0.179044	1.05946
DNMBP	0.00970481	0.179044	1.47264
ELOVL6	0.00972913	0.179044	1.20719
TNFRSF10A	0.0097423	0.179044	1.35443
RHBDF1	0.00988061	0.181034	1.31373
NET1	0.00995776	0.181895	1.20991
CASP6	0.0103612	0.187341	1.14876
SEC24B	0.0104115	0.187341	1.10393
SMARCD2	0.0104401	0.187341	1.15169
OBFC1	0.0104411	0.187341	1.12955
FAM111A	0.0104914	0.187341	0.942254
NBN	0.0105114	0.187341	0.873646
MSRA	0.0105573	0.187341	1.29936
IFIT3	0.0105839	0.187341	1.35336
BAG3	0.0105956	0.187341	1.09664
ZDHHC4	0.0105959	0.187341	1.0198
C6ORF72	0.0106231	0.187341	0.859396
MRPL22	0.0106288	0.187341	0.887259
TNIP2	0.010698	0.18801	1.14655
CPD	0.0107346	0.188106	1.1604
SP140L	0.0108279	0.188682	1.199
EXOC1	0.0108594	0.188682	1.09385
GEM	0.0108614	0.188682	1.27059
ZRANB2	0.0109434	0.18956	0.879518
NBL1	0.0109997	0.189762	1.47368
MBOAT7	0.0110722	0.189762	1.14488
MYH10	0.0110743	0.189762	0.674983
DCTN6	0.011081	0.189762	1.1329
DSCC1	0.0111632	0.190628	0.748454
GMNN	0.011244	0.191466	0.887006
ALG5	0.0113092	0.191853	1.12611
HERPUD2	0.0113304	0.191853	1.09715
ENTPD6	0.0113925	0.192365	1.07282
CTBP2	0.0116165	0.195026	1.13298
TTC7B	0.0116819	0.195026	0.745223
CASC5	0.0116876	0.195026	0.854685
ANKMY2	0.0116931	0.195026	1.02525
RNF149	0.0117303	0.195026	1.30817
C2ORF29	0.0117443	0.195026	1.08117
NUF2	0.0117859	0.195138	0.86693
AGPAT2	0.0118489	0.195138	1.22414
ATP6AP2	0.0118758	0.195138	0.8671
AVEN	0.0119027	0.195138	1.09848
CTSD	0.0119129	0.195138	1.28966
OTUD6B	0.0119867	0.195569	0.944762
PURA	0.0120576	0.195569	0.947205
C15ORF48	0.0120713	0.195569	1.6
COX7B	0.0120963	0.195569	0.935834
FAM84B	0.0121014	0.195569	2.05215
NCOA3	0.0122359	0.197215	0.936073
RLF	0.012292	0.19759	0.866935
TMBIM1	0.0125852	0.201048	1.18245
RIOK2	0.0126631	0.201048	0.931129
AHNAK	0.0127095	0.201048	1.20212
ZFYVE21	0.0127189	0.201048	1.10353
EIF2B3	0.0127387	0.201048	0.924901
SLC30A1	0.0127477	0.201048	1.32677
HMGN3	0.012751	0.201048	0.870301
IBTK	0.0127739	0.201048	1.20546
SRD5A1	0.0129256	0.201751	1.19898
HTATSF1	0.0129694	0.201751	0.925743
CTNND1	0.0129735	0.201751	1.33242
C21ORF91	0.0130401	0.201751	0.79064
PHLDA2	0.0130566	0.201751	1.65911
ZMYND11	0.0130599	0.201751	1.01177
C8ORF76	0.0130951	0.201751	0.911111
XPNPEP1	0.0131108	0.201751	1.14099
FUCA2	0.0131198	0.201751	1.22848
CALM1	0.0132248	0.202547	1.18404
ZKSCAN1	0.0132388	0.202547	1.20235
LASS5	0.0132962	0.20291	0.946467
VKORC1	0.0134942	0.204988	0.855007
PCMT1	0.0135004	0.204988	0.82059
SCHIP1	0.0136164	0.206024	0.737265
CXCL1	0.0136652	0.206024	3.35714
TMEM66	0.0136899	0.206024	1.07522
UGDH	0.0137053	0.206024	1.30137
ZNF281	0.0138419	0.206997	0.852273
FYCO1	0.0138678	0.206997	1.16092
TMEM194A	0.0138964	0.206997	0.866667
SNX4	0.0139222	0.206997	0.96
THAP4	0.014006	0.206997	1.17708
HGS	0.0140087	0.206997	1.12139
PFDN4	0.0140104	0.206997	0.932151
WDFY1	0.0140571	0.207079	1.11569
POLR1C	0.0140847	0.207079	1.05277
FBXO34	0.0141346	0.207308	1.07895
CXORF40B	0.014337	0.209765	0.898947
CAND1	0.0144382	0.210489	0.908669
TCF7	0.0144639	0.210489	1.23264
SLCO4A1	0.0144912	0.210489	1.45513
TTK	0.0146283	0.21197	0.863905
DPYSL2	0.0147205	0.212284	1.33959
ASCC3	0.014727	0.212284	1.11986
EMP1	0.0147556	0.212284	1.6985
DPY19L1	0.0148318	0.212871	1.11032
ADD1	0.0148982	0.213099	1.16538
RNF144B	0.0149625	0.213099	0.626667
ZCCHC17	0.0150005	0.213099	0.897297
HEY1	0.0150121	0.213099	0.709677
GPNMB	0.0150244	0.213099	0.43038
CCDC25	0.0151749	0.214648	1.19481
ZNF138	0.015314	0.214648	0.941463
PTPRS	0.015332	0.214648	0.698347
ABCC10	0.0153464	0.214648	1.06439
MORF4L2	0.0153643	0.214648	0.813559
TSTA3	0.0153655	0.214648	1.16562
MYNN	0.0153924	0.214648	0.882075
PRPSAP2	0.0154185	0.214648	0.882852
NSF	0.0154803	0.214785	1.09596
FAT1	0.0154996	0.214785	1.31672
FOXQ1	0.0155702	0.215268	2.09524
ITM2C	0.0156425	0.215361	1.19658
PSIP1	0.0156483	0.215361	0.872663
MBNL2	0.0159268	0.217866	1.06098
ATL3	0.0159334	0.217866	1.10464
UNC119B	0.0159387	0.217866	1.11399
EGFR	0.0160615	0.218835	1.67832
EHF	0.0160823	0.218835	2.23077
DNAH14	0.0161342	0.219047	0.865471
LRBA	0.0162208	0.219111	1.19324
RIN2	0.0162924	0.219111	1.52267
TBC1D14	0.0163039	0.219111	1.12281
MYBL1	0.0163109	0.219111	0.75
TMEM181	0.0163206	0.219111	1.097
SRP19	0.0163868	0.219511	0.913405
TAF9	0.0164683	0.219633	0.903697
ATP6V0B	0.0165061	0.219633	0.896463
PPIE	0.016535	0.219633	0.891775
CCDC84	0.0165417	0.219633	0.852313
IMPDH2	0.016589	0.219777	1.11658
AGR2	0.0168502	0.222748	4.16667
ASXL1	0.0169774	0.223634	0.859327
TXNIP	0.0170032	0.223634	1.18608
ELK3	0.0170285	0.223634	1.23031
VSIG10	0.0170834	0.223867	1.22013
LGALS3	0.0171561	0.223999	1.77825
PHF5A	0.0171722	0.223999	0.871245
PLEK2	0.0172049	0.223999	1.8
PXMP2	0.0172963	0.224702	0.881579
C9ORF80	0.0174201	0.225824	0.920635
UGT8	0.0175588	0.226814	1.78095
RBM22	0.0175717	0.226814	0.877976
MTMR6	0.0176276	0.22705	1.18904
GM2A	0.0177468	0.227785	0.743073
ACAA2	0.0177603	0.227785	1.19076
UBQLN4	0.0178546	0.228062	1.16234
PIGF	0.0178581	0.228062	1.15645
CLOCK	0.0178954	0.228062	1.084
FANCG	0.017935	0.228085	0.885135
SCARNA15	0.0180301	0.228811	0.907317
R3HCC1	0.0181164	0.229423	1.04843
CMTM6	0.0182482	0.230609	1.14067
SPATS2	0.0183951	0.231979	0.854839
KIF22	0.0185692	0.233686	0.839552
RPL13A	0.0186786	0.234572	1.12213
IDH1	0.0187366	0.234622	1.26173
RAD21	0.0187604	0.234622	0.911142
NMB	0.0188455	0.234929	1.34375
SELT	0.018875	0.234929	0.919012
TMEM33	0.0189019	0.234929	1.07424
RAD51C	0.0189811	0.235027	0.898936
RFFL	0.0190143	0.235027	1.18885
ARL4C	0.0190409	0.235027	1.59609
RAD17	0.0190948	0.235027	0.93865
TTC35	0.0191047	0.235027	0.971326
COPS4	0.019217	0.235163	0.939347
PEG10	0.0192367	0.235163	0.909425
FAM129B	0.0192517	0.235163	1.30952
PROSC	0.0193191	0.235163	1.06997
CHFR	0.0193619	0.235163	0.8583
PTBP2	0.0193977	0.235163	0.900452
TMEM185B	0.0194272	0.235163	1.09524
ANKRD32	0.0194362	0.235163	0.961853
MRPL13	0.0195466	0.235163	0.926731
PRR14	0.0196498	0.235163	0.883249
ERAP2	0.0196605	0.235163	1.2268
PRPF38A	0.0196649	0.235163	0.877778
PDE7A	0.0196712	0.235163	0.808864
MCM8	0.019717	0.235163	0.862403
EFR3A	0.0197255	0.235163	1.08006
PODXL	0.0197749	0.235163	1.4
ETHE1	0.0198038	0.235163	1.16754
SGK269	0.019818	0.235163	1.06542
PDXP	0.0198954	0.235348	0.94382
PLOD3	0.0199302	0.235348	1.22749
CYTSA	0.0199669	0.235348	0.930435
C9ORF40	0.0200418	0.235348	0.925287
SPRY2	0.0200459	0.235348	1.28736
CNO	0.0201349	0.235348	1.12179
IGFBP6	0.0201388	0.235348	3.15068
TMEFF1	0.0201459	0.235348	0.773006
PRRG1	0.02033	0.23704	1.32061
ROCK2	0.0204847	0.237967	1.13667
EIF4EBP1	0.0205699	0.237967	1.16975
APC	0.0205991	0.237967	0.986755
SH3RF1	0.020613	0.237967	1.27526
SENP2	0.020635	0.237967	0.95
FOSL2	0.0206464	0.237967	1.21477
C16ORF61	0.0207835	0.238735	0.924297
SERPINB1	0.0207923	0.238735	1.63899
STK39	0.0209899	0.240546	1.16319
SLC6A6	0.0212592	0.24317	1.10526
MAD1L1	0.0213114	0.243305	1.36232
GOLPH3L	0.0215241	0.243796	1.16
NUDT6	0.0215364	0.243796	1.15026
VCL	0.0215499	0.243796	1.32557
TRIP6	0.0215694	0.243796	1.34141
OSGIN2	0.0215829	0.243796	0.921466
ERRFI1	0.021597	0.243796	1.59206
PIK3CA	0.021666	0.244117	0.906383
CHML	0.0217264	0.244144	0.837981
ARMC1	0.0217493	0.244144	0.9318
TRNT1	0.0217982	0.244237	1.0679
EIF4A2	0.0220579	0.246287	0.869318
PTPN1	0.0221123	0.246287	0.839357
HCG_2008140	0.022127	0.246287	0.815385
ESPL1	0.0221608	0.246287	0.820896
RAB11FIP1	0.0222001	0.246287	1.10326
BZW2	0.0222513	0.246287	1.05263
C18ORF45	0.0223127	0.246287	0.927757
FERMT2	0.0223735	0.246287	0.755889
ERLIN1	0.022407	0.246287	1.16087
SH3YL1	0.0224878	0.246287	1.41779
CDCP1	0.0224968	0.246287	2.42683
ZNF512B	0.0225218	0.246287	0.963087
STEAP1	0.0225262	0.246287	2.16364
LIN37	0.0225531	0.246287	0.889423
CLGN	0.0226132	0.246496	0.409639
PMS2L1	0.0227926	0.247665	0.938389
ITGB1	0.0228047	0.247665	1.18375
CEBPB	0.0228437	0.247665	1.1239
CES2	0.0229335	0.248192	1.17677
MFN1	0.0231289	0.249858	0.952909
EXOC6	0.0231773	0.249934	1.25146
RCN1	0.0232661	0.250418	1.13816
ELOVL1	0.0233871	0.250418	1.08103
C1ORF50	0.0234189	0.250418	0.991736
MINK1	0.0234595	0.250418	1.09283
RWDD3	0.0235035	0.250418	0.923913
TBC1D9	0.0235088	0.250418	1.0356
MALL	0.023513	0.250418	4.59091
CENPL	0.0239391	0.254289	0.904
GUK1	0.0239754	0.254289	1.09772
HBEGF	0.0240031	0.254289	1.35036
AREG	0.024116	0.254679	1.93182
PITRM1	0.0241603	0.254679	1.08205
S100A11	0.0241945	0.254679	1.12025
LAGE3	0.0242089	0.254679	0.921109
HLA-A	0.0243014	0.254698	1.30816
MRPS28	0.0243139	0.254698	0.922405
ORC6L	0.0243374	0.254698	0.903833
ABCE1	0.0245203	0.255418	1.0665
TM9SF3	0.0245461	0.255418	1.21463
SKI	0.0246769	0.255418	1.11688
KIAA1524	0.0246796	0.255418	0.935897
SERF1A	0.0246942	0.255418	0.87122
SUMF1	0.0247671	0.255418	1.18325
TNFRSF21	0.0247677	0.255418	1.55599
GPR172A	0.0247692	0.255418	1.06509
DHX32	0.024822	0.255418	1.06619
TAX1BP3	0.02483	0.255418	1.08548
DDX56	0.0249451	0.255544	1.12403
HDGF	0.0249557	0.255544	1.11165
GALNT10	0.0249771	0.255544	1.29231
HSD17B10	0.0250118	0.255544	0.848
FAM13B	0.0251587	0.25661	0.909091
LOC388796	0.0252649	0.257258	0.917808
CST3	0.0253661	0.257475	1.25267
AP1G2	0.0253716	0.257475	1.3617
PEX13	0.0254341	0.25759	1.08777
SLC39A11	0.025502	0.25759	1.11034
PCK2	0.0255588	0.25759	1.2375
PMS2L3	0.0255677	0.25759	0.93254
PRKD2	0.0256385	0.25759	1.05442
LTBR	0.0256394	0.25759	1.21875
GTF2H2	0.0257236	0.258007	0.91637
ZBTB5	0.0259859	0.260143	0.923372
TRAPPC4	0.0260229	0.260143	0.914286
YTHDC2	0.0262131	0.26161	0.89313
TTC4	0.026367	0.262264	0.936364
TBC1D22A	0.0263993	0.262264	1.11255
NAF1	0.0264092	0.262264	1.10256
ANXA1	0.0267396	0.265109	1.20802
LOC283267	0.0268017	0.265288	0.910506
TRIM52	0.0268688	0.265516	0.897849
JPH1	0.0269245	0.265632	1.89189
PCTP	0.0269714	0.265658	1.11468
HIPK2	0.0270153	0.265658	1.13146
RAC1	0.0270986	0.266043	1.10251
ATOX1	0.0272248	0.266679	0.919042
POLR2G	0.0272518	0.266679	0.904175
JARID2	0.027453	0.267696	0.739274
PPIA	0.0274704	0.267696	1.10012
PARL	0.027489	0.267696	0.875617
HSD17B12	0.0276634	0.268083	1.14755
DNAJC6	0.0276795	0.268083	0.863636
JUB	0.027723	0.268083	1.14846
DENND5A	0.027745	0.268083	0.805014
GALNT1	0.0277512	0.268083	1.14706
RPE	0.0278608	0.268712	1.0379
RBCK1	0.0280561	0.269967	1.15037
SEMA4B	0.0280805	0.269967	1.37226
ACTN4	0.0283608	0.271406	1.08731
LOC100131801	0.0283619	0.271406	0.926627
OSBPL9	0.0283653	0.271406	0.879276
PTPN12	0.0284551	0.27143	1.11277
DYNC1I2	0.0284578	0.27143	1.03758
TSEN2	0.0287142	0.273434	1.07487
PRKAB2	0.0287587	0.273434	0.921569
KAT2B	0.0288883	0.274234	0.818792
CBS	0.0289498	0.274386	0.705882
IRAK1	0.0290832	0.274692	1.10056
MYADM	0.0291606	0.274692	1.27372
ERI3	0.0291779	0.274692	0.902128
ZNF384	0.0292056	0.274692	1.06931
KIF4A	0.0292207	0.274692	0.912029
FUCA1	0.0292556	0.274692	1.20479
CDKN1A	0.0293059	0.274737	1.49091
PPP2CB	0.029508	0.275894	1.06839
PLAU	0.0295208	0.275894	1.96203
SIAE	0.0296741	0.276897	1.15476
PI4KA	0.0297239	0.276933	0.873684
RACGAP1	0.0298196	0.27711	0.941704
C11ORF49	0.0299067	0.27711	1.059
ZDHHC6	0.0299216	0.27711	1.06834
ZFP36L2	0.0299665	0.27711	1.21347
LRRC40	0.0300159	0.27711	0.934156
SCARB2	0.0300935	0.27711	1.13793
SIP1	0.0301312	0.27711	0.807074
HIBADH	0.0301348	0.27711	1.15992
PLA2G12A	0.0301634	0.27711	1.17621
MYBL2	0.0302026	0.27711	0.786408
PAK1IP1	0.0303209	0.277773	0.911357
CFDP1	0.0305374	0.278421	1.1812
CDC7	0.0305612	0.278421	0.882521
WHSC2	0.0305797	0.278421	1.06195
TIMM10	0.0306038	0.278421	0.93742
ZNF271	0.0306227	0.278421	0.873418
HIATL2	0.0307168	0.27877	0.915556
FAM120AOS	0.0308661	0.27877	0.891441
TDRD7	0.0308991	0.27877	1.08205
FAS	0.0309374	0.27877	1.1681
HNRNPH3	0.0309477	0.27877	0.882645
TAP1	0.0309746	0.27877	1.14765
GEMIN4	0.0309847	0.27877	1.14346
ZNF266	0.0310916	0.279273	0.897143
SH2B3	0.0311333	0.279273	1.32447
NACC2	0.0312532	0.279932	1.11207
C6ORF203	0.0314003	0.280832	1.03042
ATG12	0.0314568	0.280921	0.945946
PLSCR3	0.03158	0.281604	1.17083
SNAPIN	0.031679	0.28207	0.879121
TADA1	0.0317613	0.282385	0.941704
AGPAT9	0.0318579	0.282827	1.65584
BTBD7	0.0319319	0.283067	1.1617
MCC	0.0322012	0.285035	0.685393
RDH10	0.0323019	0.285507	1.42233
TRIP10	0.0324214	0.286144	1.21106
IGF2R	0.0324955	0.286379	1.12
CLDN12	0.0325671	0.286582	1.13651
LOC401504	0.0326745	0.286582	0.940848
GTF2A2	0.0326912	0.286582	0.954871
SLC7A11	0.0327087	0.286582	1.49915
EPS8	0.0329044	0.287878	1.5291
IMMP2L	0.0329964	0.288264	1.09292
LCOR	0.03306	0.288402	1.19205
C1ORF85	0.0332476	0.28952	1.19588
DPY30	0.0332842	0.28952	0.915267
VAMP3	0.0334186	0.29027	1.11622
DDIT4	0.0335116	0.290481	1.31915
DDB2	0.0335723	0.290481	1.16495
AKAP1	0.0336097	0.290481	1.11213
PJA2	0.0336745	0.290481	0.856263
PBX3	0.0337705	0.290481	0.871345
ETNK1	0.0337736	0.290481	1.15274
RPAP2	0.0337901	0.290481	0.987069
HMMR	0.0338661	0.290481	0.929304
CDC23	0.0338804	0.290481	0.935294
PHF15	0.0339248	0.290481	1.13889
GDI1	0.034063	0.290601	0.863014
TBCB	0.0340754	0.290601	0.894322
ACTL6A	0.0340834	0.290601	0.955626
CNOT7	0.0342075	0.291247	1.12603
CCNH	0.0343036	0.291252	0.895093
C17ORF81	0.0343465	0.291252	0.940397
APOOL	0.0343768	0.291252	0.904762
SLC20A1	0.0344014	0.291252	1.09766
NPC2	0.0345587	0.291508	1.07811
MPP5	0.0345791	0.291508	1.18945
PRPF18	0.0346012	0.291508	0.980392
MLLT6	0.0346321	0.291508	1.07071
C12ORF62	0.0347027	0.291508	0.87924
PCGF6	0.0347217	0.291508	0.904523
BRI3	0.0348149	0.291675	1.19849
GCN1L1	0.0348384	0.291675	1.07679
SLC25A14	0.0349448	0.291806	0.966981
PPT1	0.0349551	0.291806	0.96732
UBE2D2	0.0349993	0.291806	0.948052
RAD54B	0.0350735	0.29202	0.904545
FTH1	0.0352161	0.292804	1.14202
RNF26	0.0355367	0.294983	0.9
RBBP7	0.0355948	0.294983	0.873341
ITGA2	0.0356251	0.294983	2.48558
WDR36	0.0358667	0.296246	1.07937
COCH	0.0359191	0.296246	0.904977
TGFBI	0.0359249	0.296246	5.38351
ID4	0.0360371	0.296764	0.28169
SP4	0.0363089	0.298595	0.862816
HSCB	0.0363965	0.298687	0.951654
FEZ2	0.0365063	0.298687	1.08136
UBXN7	0.0365243	0.298687	0.945205
TST	0.0365289	0.298687	1.19048
SNRPC	0.0365887	0.298687	0.889381
C17ORF58	0.0366174	0.298687	0.911067
SRGAP2P1	0.0367387	0.299272	0.929851
QARS	0.0370016	0.301006	1.09148
OIP5	0.0370566	0.301048	0.824089
SLC43A3	0.0372764	0.30177	1.66204
LDOC1L	0.0372784	0.30177	1.19182
NUP43	0.0372958	0.30177	0.890833
TCF7L2	0.0375901	0.303745	1.15938
C11ORF73	0.037647	0.303796	0.873134
ZBTB26	0.0377913	0.304489	0.874346
TTC14	0.0378338	0.304489	0.941176
ELF3	0.038023	0.305468	2.74194
FKSG49	0.0380848	0.305468	0.967742
TRIM5	0.0381531	0.305468	1.01053
UBE2A	0.0382634	0.305468	0.9213
RNF14	0.0383044	0.305468	0.912145
RRM2B	0.0383139	0.305468	0.883495
GMPR2	0.0384489	0.305468	1.08815
TUBB3	0.0384663	0.305468	0.899263
ECHS1	0.0384971	0.305468	1.04977
AP1M2	0.0385342	0.305468	1.82474
SGCE	0.038537	0.305468	0.794483
NUSAP1	0.0385682	0.305468	0.940696
C15ORF52	0.0386143	0.305468	2.04688
KIF20A	0.0386774	0.305567	0.811944
TMEM45A	0.0388911	0.305898	0.598958
WDR8	0.0389398	0.305898	0.902256
TRA2B	0.0389618	0.305898	0.963234
ATE1	0.0390086	0.305898	1.06529
ITGB3BP	0.0390368	0.305898	0.955752
NCBP2	0.0390693	0.305898	0.953039
HK2	0.0390746	0.305898	1.13253
KDSR	0.0392935	0.307213	1.16185
NUP93	0.0395911	0.308635	0.89418
KIAA0317	0.0396248	0.308635	1.07925
SNRNP27	0.0396517	0.308635	0.932917
CDKN3	0.0396801	0.308635	0.936275
NT5C3	0.0397345	0.308659	1.14552
SOX9	0.039842	0.309096	2.02941
FUS	0.0399947	0.309882	0.948187
TMEM131	0.0400521	0.309928	1.0728
BASP1	0.0401554	0.310077	0.277961
VGLL4	0.0401742	0.310077	1.12549
GTPBP8	0.0404279	0.311516	0.906634
FNDC3A	0.040464	0.311516	1.16447
C9ORF89	0.0405526	0.311559	1.14468
TRIM8	0.0405804	0.311559	1.24189
SORD	0.0406247	0.311559	1.21948
ARL6IP5	0.0407151	0.311856	1.13457
IK	0.0407691	0.311873	0.908551
SPTAN1	0.0408485	0.312085	1.14356
SLC25A15	0.04111	0.313208	1.13393
TRIM14	0.0411599	0.313208	1.06079
HOXB3	0.0411639	0.313208	1.3352
NFKBIA	0.0412034	0.313208	1.13128
SEC11C	0.0413569	0.313806	0.884259
ZNF665	0.0413861	0.313806	0.772388
SPAG5	0.0415599	0.314728	0.911076
PIK3R3	0.0416403	0.314941	0.856287
TIPRL	0.0417542	0.315407	0.91598
UNK	0.0418218	0.315522	0.884393
FAM114A1	0.0419075	0.315773	1.28495
FLJ32065	0.042056	0.315843	0.931937
SEC61B	0.0424105	0.315843	0.925136
RFTN1	0.0424779	0.315843	0.855
IMMP1L	0.0424901	0.315843	0.904988
AAK1	0.0424968	0.315843	1.1464
CRK	0.0425012	0.315843	1.06021
VARS	0.0425244	0.315843	1.0625
HERC4	0.0425807	0.315843	1.04988
SLC30A7	0.0425972	0.315843	1.13817
EEF1E1	0.0427103	0.315843	0.942793
ROMO1	0.0428288	0.315843	0.96772
STK24	0.0428407	0.315843	1.08377
TAB2	0.0428649	0.315843	0.930556
RALA	0.0428705	0.315843	1.08024
CASC4	0.0428836	0.315843	1.08578
RDX	0.0428937	0.315843	0.930802
ADIPOR2	0.0429243	0.315843	1.11095
ZFP1	0.0429347	0.315843	0.913978
C2CD2	0.0429978	0.315843	1.45455
FASN	0.0430426	0.315843	1.11152
PEF1	0.0430677	0.315843	0.906874
TUBD1	0.0431012	0.315843	0.894472
CLTC	0.0431909	0.315843	1.07341
LRRC59	0.0432265	0.315843	1.08929
PPAPDC1B	0.0432267	0.315843	1.30208
GRPEL1	0.0433484	0.316349	1.08411
CSTF1	0.0440628	0.321127	0.933798
TNRC6A	0.0442338	0.321127	0.922857
KPNA6	0.0442356	0.321127	1.05426
COTL1	0.0443112	0.321127	1.14903
ZNF267	0.0443491	0.321127	0.896996
ATP6AP1	0.0443625	0.321127	0.90878
ZCRB1	0.0444249	0.321127	0.959527
ZFP36	0.0444293	0.321127	1.20098
RNF170	0.0446133	0.321567	0.981132
NCRNA00116	0.0446467	0.321567	1.14575
PITPNA	0.0446502	0.321567	1.04124
ETS2	0.0447546	0.321934	1.34783
PMF1	0.0448644	0.322014	0.908894
ATP8B1	0.0448725	0.322014	1.86047
TANK	0.0450205	0.322692	1.13645
ITPR3	0.0456245	0.325884	1.30341
AKT1	0.0456533	0.325884	1.0939
ACP6	0.0457125	0.325884	1.21017
FCHSD2	0.045763	0.325884	0.8
RNF128	0.0457696	0.325884	3.5625
ANKFY1	0.0457903	0.325884	1.05417
AP1S1	0.0460761	0.327532	1.17791
TWIST1	0.0462082	0.328084	0.192982
ARPC2	0.0463712	0.328294	1.09193
SLC35B2	0.0463934	0.328294	1.10321
SH3BP4	0.0464011	0.328294	1.28646
CSAD	0.0465677	0.32871	0.896907
RNF115	0.0465691	0.32871	0.916667
KLF4	0.0467232	0.329223	1.66154
CCDC152	0.0467722	0.329223	0.880274
TRIM4	0.0468768	0.329223	1.06167
NSUN5P2	0.0468942	0.329223	0.894608
MYH9	0.0469148	0.329223	1.18727
HAUS7	0.0472257	0.331019	0.902128
KLHL7	0.0473808	0.331721	0.895349
CLDN4	0.0475448	0.331982	2.53846
N4BP2L2	0.0476489	0.331982	1.13904
FBXW11	0.047693	0.331982	0.91358
NR3C1	0.0477382	0.331982	1.00362
CCDC124	0.0478023	0.331982	0.942568
MRPS35	0.0478256	0.331982	1.0457
RBM39	0.0478545	0.331982	0.912946
EID1	0.0478587	0.331982	0.901119
UQCRC1	0.0479288	0.332086	1.07438
ZBED5	0.0480528	0.332563	0.940405
ABCF2	0.0481578	0.332908	1.05882
NDUFS5	0.0482824	0.333054	0.939145
GLG1	0.0483192	0.333054	1.07692
C10ORF32	0.0483448	0.333054	1.10803
LOC729680	0.0484504	0.333401	1.14394
RRAS	0.0485162	0.333473	1.19262
PCNP	0.0488771	0.335571	0.908752
GBE1	0.048948	0.335676	1.12067
GSR	0.0491838	0.336776	1.09705
ATP6V1A	0.0492492	0.336776	0.921883
TTLL12	0.0493129	0.336776	1.06147
NUCB2	0.049332	0.336776	0.913732
UBR1	0.0495331	0.33744	1.04187
ACYP1	0.0495412	0.33744	0.898263
SMARCA4	0.0496659	0.337871	1.01127
ALAS1	0.0497842	0.337871	1.10453
PIGG	0.0498094	0.337871	1.04781
PDIA4	0.0498287	0.337871	1.17703
RNF20	0.0499088	0.338034	0.964432
SLC7A6OS	0.0501725	0.338819	0.907489
ZCCHC11	0.0501786	0.338819	0.893939
ALDH5A1	0.0502417	0.338819	0.745455
SPG21	0.0502495	0.338819	1.04
BANF1	0.050438	0.339609	0.882222
C12ORF41	0.0504793	0.339609	0.955343
TCEA2	0.0505595	0.339688	0.873494
NONO	0.0506038	0.339688	0.90581
ALDH1A3	0.0508071	0.340647	2.08
NDUFA6	0.0508598	0.340647	0.876923
GLCCI1	0.0509665	0.340859	0.917355
RPL7L1	0.0510331	0.340859	1.01721
ELOVL5	0.051061	0.340859	0.982747
SAP18	0.0512031	0.341335	1.06426
PIGX	0.0512455	0.341335	0.849421
AURKA	0.0513639	0.341746	0.892791
DDX17	0.0515546	0.342524	0.922567
KIAA1109	0.0516284	0.342524	1.10375
ACBD5	0.0516513	0.342524	1.08138
PTPRK	0.0517508	0.342648	1.44805
DBT	0.0517837	0.342648	0.916454
EID2	0.0519416	0.343316	0.88724
DCTD	0.0520291	0.343517	1.10671
SOX4	0.0521023	0.343624	1.05519
NNT	0.052349	0.344512	1.13067
CREBL2	0.0524393	0.344512	1.09767
HLA-G	0.0524447	0.344512	1.14085
MNAT1	0.0524655	0.344512	0.922794
BCAS2	0.0525379	0.344612	0.897181
IMPA1	0.0526353	0.344876	0.874884
LSM4	0.0528083	0.34543	0.907139
SPRED2	0.0528345	0.34543	1.10053
SSBP2	0.052985	0.34573	0.712766
TMOD3	0.0532209	0.34573	1.08604
IFRD2	0.0532491	0.34573	1.07246
IFITM3	0.0532517	0.34573	1.25636
SNN	0.0532696	0.34573	0.813953
LOC654433	0.0532743	0.34573	2.02632
BECN1	0.053282	0.34573	1.0638
C11ORF10	0.0533795	0.345817	0.93277
NFYB	0.0534211	0.345817	0.909953
GSTO1	0.0534674	0.345817	1.13424
LSM14A	0.053607	0.346348	0.902985
HAX1	0.0537633	0.346393	0.947992
IQCB1	0.0537809	0.346393	0.948339
CCDC99	0.0538353	0.346393	0.842031
IDE	0.0538481	0.346393	1.09685
GABARAPL2	0.0539012	0.346393	0.960958
NUDCD3	0.0539757	0.346465	1.11399
OAT	0.054029	0.346465	0.943489
NUDCD2	0.0541354	0.346465	0.904447
SLC39A14	0.0542103	0.346465	1.2021
FAM101B	0.0542463	0.346465	0.399093
FBXO5	0.0542573	0.346465	0.870162
TMEM68	0.0544328	0.346876	0.912023
KIAA0564	0.0544791	0.346876	1.07303
LAMB1	0.0545352	0.346876	1.38177
SUGT1	0.0545834	0.346876	1.07278
KRT80	0.0546094	0.346876	1.80851
PTP4A2	0.0547159	0.347187	1.12172
AACS	0.0547806	0.347196	1.08646
PCCA	0.0548325	0.347196	1.05229
MRPL28	0.0551224	0.348474	0.942857
ANAPC4	0.05515	0.348474	1.03578
MMD	0.0552721	0.34888	1.36164
NDUFA11	0.0555218	0.35009	0.901158
SNX6	0.0557618	0.35102	1.09783
JAK1	0.0558071	0.35102	1.18402
NCOR2	0.0558442	0.35102	1.22123
RPL26L1	0.0559127	0.351085	0.936147
CCDC23	0.0559884	0.351195	0.889908
NGFRAP1	0.0561344	0.351744	0.933907
C14ORF119	0.0562616	0.351833	1.0834
DOCK9	0.0562785	0.351833	1.13839
PRPF4B	0.0563468	0.351833	0.892473
MUT	0.0564384	0.351833	0.942408
HLA-C	0.056507	0.351833	1.00802
WEE1	0.056541	0.351833	0.942857
MTIF3	0.0565571	0.351833	1.09609
APP	0.0566327	0.351899	1.10303
SNUPN	0.0567298	0.351899	1.08025
PLA2G4A	0.0567429	0.351899	1.62069
HUS1	0.0569266	0.352052	1.07171
MAPK1IP1L	0.056964	0.352052	1.09259
C18ORF10	0.0570084	0.352052	0.936527
PUS1	0.0571044	0.352052	1.08095
CCNE2	0.0571148	0.352052	0.853428
HSPG2	0.0571179	0.352052	1.42308
TMSB15B	0.0571812	0.352082	0.648
ZCCHC7	0.0572615	0.352217	0.946429
CCDC34	0.0573786	0.352577	0.895833
PRKD3	0.0576438	0.353846	0.928344
UQCRH	0.0577674	0.353932	1.031
POLA1	0.0577753	0.353932	0.832215
CIAO1	0.058126	0.355618	1.17051
MARVELD1	0.0581684	0.355618	1.18129
MAK16	0.0584799	0.357116	1.12
TBCCD1	0.058581	0.357116	0.90393
S100PBP	0.0586287	0.357116	0.897849
M6PR	0.0586504	0.357116	1.06443
LEPROTL1	0.0588327	0.357542	1.10526
MRPL37	0.0588391	0.357542	0.894793
FHL1	0.0590566	0.358138	0.458054
CCNB2	0.0591145	0.358138	0.938531
OCIAD1	0.0591676	0.358138	1.09368
CKS2	0.0591748	0.358138	0.965242
GRB10	0.059299	0.358265	1.4854
CDCA7L	0.0593352	0.358265	1.08092
HIRIP3	0.0594605	0.358265	0.948864
UHRF1BP1	0.0594776	0.358265	0.919521
BACE2	0.0594929	0.358265	1.55181
STAM	0.0596133	0.358632	1.07158
BRD7	0.0596734	0.358635	0.934084
SMAP1	0.0599627	0.359586	0.93844
KIF18A	0.0600344	0.359586	0.889313
CRIP1	0.0600645	0.359586	2.96875
BNIP3	0.0600702	0.359586	0.842402
NRD1	0.0606908	0.362865	0.896552
IL18	0.0607384	0.362865	1.73016
HLTF	0.0608232	0.363012	0.840637
ZBTB4	0.0611302	0.364443	1.07759
SYTL2	0.0611839	0.364443	1.40777
CDK2	0.0613571	0.365114	0.916667
COMT	0.061505	0.365633	1.08115
SQRDL	0.0617658	0.366267	1.63889
ACSL4	0.0617664	0.366267	0.986486
NAPA	0.0618104	0.366267	0.919149
GPR108	0.061882	0.366267	0.984848
NSMAF	0.0619155	0.366267	1.05604
LSM6	0.0620823	0.366623	1.05717
YWHAB	0.0620972	0.366623	1.05568
DUSP3	0.0624092	0.367843	1.03846
COX8A	0.062426	0.367843	0.921501
MGST2	0.0624993	0.367916	1.23551
COPS5	0.0631246	0.371234	0.916862
SYNJ2BP	0.0634958	0.373053	1.10284
LPXN	0.0638372	0.374694	1.38043
GFPT1	0.0639436	0.374954	1.11935
NIN	0.0641171	0.375288	0.919771
CBX1	0.0642346	0.375288	0.887623
ZNF711	0.0642816	0.375288	0.685484
PCOLCE2	0.0643089	0.375288	0.604396
ELP3	0.064312	0.375288	1.06472
LOC440983	0.0644724	0.375621	0.976431
TUBGCP2	0.0644937	0.375621	1.07843
WDR67	0.0647538	0.376036	0.887387
GGH	0.0647551	0.376036	0.907459
FAM117A	0.0647726	0.376036	0.790323
RUVBL2	0.0648534	0.376036	1.04524
PAK1	0.0648769	0.376036	1.03553
RNF6	0.06507	0.376558	1.0525
POLR1D	0.0650919	0.376558	1.1437
SLC37A3	0.0652664	0.377206	1.17376
FAM85A	0.0656087	0.37834	1.05742
P4HTM	0.0656648	0.37834	1.205
PIN1	0.0656875	0.37834	0.867863
FAM36A	0.065802	0.37834	1.14299
DHTKD1	0.0658368	0.37834	0.926471
KLHL5	0.0658391	0.37834	1.03461
FAM192A	0.0659716	0.37874	0.867925
LASS2	0.0665496	0.381646	1.07833
SLC1A5	0.0666044	0.381646	1.07193
ZMIZ2	0.0668076	0.382268	1.08861
TCF19	0.0669641	0.382268	0.91954
WDR54	0.0669902	0.382268	0.905455
FUBP1	0.0670435	0.382268	0.945946
PQBP1	0.0670948	0.382268	0.884993
CHD1L	0.067161	0.382268	0.823834
DRAM1	0.067201	0.382268	1.11348
KRT19	0.0672203	0.382268	13.0962
RPRD1B	0.067341	0.382593	0.909091
TAB3	0.0674557	0.382725	0.939759
ZNF238	0.0675414	0.382725	1.14384
TDG	0.0676179	0.382725	0.918782
SLC26A2	0.0676182	0.382725	0.893617
CCND1	0.0678668	0.383292	1.10784
MAPKAPK3	0.0679044	0.383292	1.17606
RNASEH2A	0.0679091	0.383292	0.949416
LIN52	0.06805	0.383728	0.90795
SRPK1	0.0683722	0.385185	1.02385
NDUFB4	0.0684756	0.385366	0.933394
RBM4	0.0685322	0.385366	0.970495
NDUFA1	0.0688275	0.386666	0.927577
TUBB2A	0.0692676	0.388776	0.801834
PSMD5	0.0695756	0.390141	1.02828
KCTD18	0.0697096	0.390436	1.04727
TMEM170A	0.0698211	0.390436	1.07558
HOXA10	0.0698225	0.390436	1.93671
MYL12A	0.0701366	0.391829	1.10151
LYN	0.0704687	0.393307	1.26389
ENSA	0.0705664	0.393307	1.10303
KIAA1797	0.0706831	0.393307	0.901408
CDCA8	0.070704	0.393307	0.909091
PPWD1	0.0707275	0.393307	0.918635
RBM33	0.0708338	0.393536	1.03084
ADORA2B	0.071001	0.394101	1.63534
NRP1	0.0711039	0.394309	1.46237
XPO4	0.0712757	0.394899	1.07373
RNMTL1	0.0713413	0.394899	1.04294
STX16	0.0715127	0.395183	0.890351
BNIP2	0.0715237	0.395183	0.888646
IKBKAP	0.0716016	0.395224	0.929972
HOXB7	0.0716925	0.395224	1.37445
UBE2H	0.0717278	0.395224	1.13189
ALDH2	0.0718574	0.395577	1.53646
NAA40	0.071927	0.395598	0.96875
LZIC	0.0720372	0.395844	0.918987
TBL2	0.0721393	0.396043	1.10745
SLC12A2	0.0723554	0.396868	1.12629
WDSUB1	0.0726369	0.397843	0.938776
C6ORF192	0.0726651	0.397843	1.36402
CCDC111	0.0727743	0.398079	1.08696
LOC152217	0.0729816	0.398851	0.961774
SFRS1	0.0730899	0.39903	0.865724
VTI1B	0.0732203	0.39903	1.09137
UCHL1	0.0732515	0.39903	0.272059
TGFA	0.0733196	0.39903	2.52083
TMEM106C	0.0733983	0.39903	0.862093
KAT5	0.0734115	0.39903	0.923767
DCLRE1B	0.0736493	0.399749	0.972477
CCDC85C	0.0736763	0.399749	1
NDUFB11	0.0738168	0.39996	0.910878
PKD2	0.0739106	0.39996	1.1592
CAMK2D	0.0739289	0.39996	1.15854
ESCO1	0.0739806	0.39996	0.892857
SHPRH	0.0741751	0.400652	0.870722
SYNE2	0.0743499	0.401236	0.805369
AP4B1	0.0751212	0.405036	0.877743
SOAT1	0.0753721	0.406026	1.006
LSG1	0.0756211	0.406702	0.881967
C19ORF42	0.0756325	0.406702	0.948276
ANKRD49	0.0758805	0.407582	0.921986
PHF14	0.0759314	0.407582	1.08538
SLC25A24	0.0762267	0.408803	1.05419
SCNM1	0.0765246	0.409818	0.930754
RPL22L1	0.0765519	0.409818	1.30137
ZMYM6	0.0767537	0.410534	1.06798
LOC221710	0.0769108	0.411009	0.883858
C17ORF91	0.0770087	0.411168	1.35928
KIAA1731	0.0771467	0.41154	0.924444
CKLF	0.0774481	0.41229	1.05309
GCLC	0.0775621	0.41229	1.0203
ZNF567	0.0775948	0.41229	0.867347
TAGLN2	0.0775971	0.41229	1.10802
HNRNPA0	0.0776612	0.41229	0.950842
ATAD2	0.0777318	0.41229	0.848214
RB1CC1	0.077833	0.41229	0.909465
TGS1	0.0778344	0.41229	1.10556
B3GALNT2	0.0779325	0.412436	1.08104
SLPI	0.0780264	0.412436	4.08333
SUV39H2	0.07811	0.412436	0.893443
YIPF3	0.0781358	0.412436	1.00904
MUTED	0.0782116	0.412476	0.944046
INTS6	0.0783755	0.412645	1.07975
SND1	0.0783806	0.412645	1.11059
IPO4	0.0785253	0.412715	1.20818
ITGA5	0.0785309	0.412715	1.36905
L1CAM	0.0786099	0.412771	0.343284
DR1	0.0788035	0.413362	0.855971
RANBP6	0.0788596	0.413362	0.889205
RWDD4A	0.0789468	0.413405	1.08935
HP1BP3	0.0790051	0.413405	0.906077
PHYH	0.079345	0.413834	1.07157
CD2AP	0.0793663	0.413834	1.18072
ZMYND19	0.0794263	0.413834	0.96463
JMJD1C	0.0794888	0.413834	0.910714
PPP1R15A	0.0795166	0.413834	1.06977
TNFRSF12A	0.0795644	0.413834	1.18868
VPS41	0.0795677	0.413834	1.06667
FAM126A	0.0796735	0.414006	0.847403
ZBTB8A	0.0797739	0.414006	0.858086
RPS19BP1	0.0798068	0.414006	0.920455
NUP107	0.0799899	0.414425	0.939324
SPAST	0.0800453	0.414425	0.937695
SVIP	0.0801913	0.414425	1.12245
PSMB9	0.0802351	0.414425	1.18676
COQ4	0.0802811	0.414425	0.912052
CBR1	0.0803308	0.414425	1.24938
NOP2	0.0803687	0.414425	1.125
CIAPIN1	0.0804975	0.414734	0.88172
CCDC21	0.0808566	0.415223	0.846995
GSTA4	0.0808776	0.415223	0.723577
SCYL2	0.0809447	0.415223	0.979188
ENPP4	0.0810317	0.415223	1.35294
DGKA	0.0810428	0.415223	1.21311
MYST1	0.0811182	0.415223	0.920455
CARKD	0.0811235	0.415223	1.04313
CDCA5	0.0811434	0.415223	0.887273
CMPK1	0.0812991	0.415444	1.1082
APRT	0.0813246	0.415444	1.06344
EPAS1	0.0815396	0.416046	1.27715
PRIM1	0.0816621	0.416046	0.908257
YAP1	0.0816674	0.416046	1.03648
C20ORF30	0.0817184	0.416046	0.925086
PRR11	0.0818125	0.416174	0.952644
GPRC5A	0.0824846	0.419239	2.48739
ROBO1	0.0827369	0.419702	0.843284
HIST1H1C	0.0828624	0.419702	0.789366
CMTM8	0.0828894	0.419702	1.42222
SSSCA1	0.0829086	0.419702	0.937255
KBTBD2	0.0829484	0.419702	1.05263
PEX7	0.0829935	0.419702	1.01778
HMOX2	0.0831448	0.420028	1.04013
SLC25A1	0.0831974	0.420028	1.076
UBE2V2	0.0834447	0.420579	0.952279
LIPA	0.0834768	0.420579	1.08023
TMX3	0.0835867	0.420579	1.14359
BRD9	0.0836419	0.420579	1.05236
G3BP1	0.0838063	0.420579	0.963178
CCDC6	0.083878	0.420579	1.2079
HEATR1	0.083955	0.420579	1.03723
PLSCR1	0.083965	0.420579	1.29483
SERPINH1	0.0839804	0.420579	0.931034
DYNC2LI1	0.0840124	0.420579	1.09957
FAM162A	0.084074	0.420579	1.14573
ADAMTS1	0.0841823	0.420752	0.4375
NSL1	0.0843088	0.420752	0.9566
TAPBP	0.084351	0.420752	1.14685
H2AFY	0.0843878	0.420752	1.07595
GPD1L	0.0844757	0.420842	1.17949
RPA3	0.0847311	0.421766	0.949909
LYRM4	0.0848862	0.42219	0.982955
FXR1	0.0851744	0.422982	0.987879
DBF4	0.0852335	0.422982	0.951707
TAF2	0.085256	0.422982	0.920036
NDC80	0.0854003	0.423146	0.873606
C7ORF42	0.0854294	0.423146	1.07205
TMEM218	0.0855665	0.423477	0.895765
PPFIA1	0.0856949	0.423764	0.972179
SNX10	0.0857655	0.423766	0.655779
PSMD8	0.0859639	0.424379	0.938294
USP11	0.0860304	0.424379	0.952715
ZNF544	0.086165	0.424695	0.918567
NCOR1	0.0863219	0.425121	1.05145
DYNLT1	0.0865647	0.425735	1.05101
CAPN7	0.0865887	0.425735	0.971098
ATP6V1B2	0.0867096	0.425735	1.1097
AHR	0.086729	0.425735	1.44118
PCYOX1	0.0869638	0.426389	1.04059
EMP3	0.0870038	0.426389	2.12903
E2F7	0.0871402	0.426711	1.03966
UBXN2A	0.0874315	0.427145	0.96162
C1ORF198	0.0874555	0.427145	1.1875
SCNN1A	0.087483	0.427145	2.63158
AP2B1	0.0875124	0.427145	1.11826
AGPS	0.0876902	0.427329	1.08898
LOC100272216	0.08773	0.427329	0.881818
C4ORF34	0.0877627	0.427329	1.2963
GRK5	0.0878791	0.427551	1.07692
PTGFRN	0.0883315	0.428047	1.23596
C11ORF51	0.0883601	0.428047	0.982517
P4HB	0.0884631	0.428047	1.03959
TPM4	0.0884823	0.428047	1.1771
C20ORF111	0.0885243	0.428047	0.882952
USP13	0.0886531	0.428047	0.918699
BCL2L13	0.0887195	0.428047	1.05405
RMI1	0.0887328	0.428047	0.917279
MSRB3	0.0887967	0.428047	0.509317
RPS2	0.088847	0.428047	1.06504
KIAA2018	0.0889492	0.428047	1.05904
GLE1	0.0890514	0.428047	0.920091
NQO1	0.0890833	0.428047	1.35516
CEP152	0.0891013	0.428047	0.965333
NDE1	0.0891081	0.428047	0.834071
VASP	0.0891643	0.428047	1.15
KIAA0664	0.0891884	0.428047	1.0463
AHSA2	0.0892687	0.428092	1.21481
C20ORF177	0.0895148	0.428446	0.953441
SFT2D1	0.0895929	0.428446	1.01955
ASL	0.0896101	0.428446	1.23457
FBXO22	0.0896268	0.428446	1.09535
IRX3	0.0897783	0.428519	0.770408
EBPL	0.0898166	0.428519	1.07345
GTF2F1	0.0901201	0.428519	1.03644
GLOD4	0.0902385	0.428519	1.03716
SGMS2	0.0903006	0.428519	1.35263
ANKRD17	0.0903323	0.428519	1.02473
RUNX2	0.0903718	0.428519	1.34375
SMEK2	0.0904246	0.428519	1.04826
DCAF13	0.0904699	0.428519	0.954733
DBI	0.0905446	0.428519	1.04301
C1GALT1	0.0905959	0.428519	1.13163
NUMBL	0.0908105	0.428519	0.966279
ACTR1A	0.0908793	0.428519	0.914439
PRR3	0.0909268	0.428519	0.878981
PDCD6	0.091142	0.428519	1.09423
LOC400027	0.0911554	0.428519	0.892308
TRMT112	0.0911736	0.428519	0.928785
TFPI	0.0912326	0.428519	4.02151
PXMP4	0.0912916	0.428519	0.926829
NIPAL2	0.0913962	0.428519	1.17986
TPRG1L	0.0914389	0.428519	0.996198
YEATS2	0.0914547	0.428519	0.938389
KLHL15	0.0915453	0.428519	0.835227
GNA11	0.0915671	0.428519	0.986207
CENPM	0.0916006	0.428519	0.862816
FANCD2	0.0916512	0.428519	0.866438
C12ORF23	0.0916956	0.428519	0.876008
PNKD	0.0917813	0.428519	0.898964
SLC39A9	0.0918941	0.428519	1.09524
PRR13	0.0919099	0.428519	1.05426
SPC25	0.0919535	0.428519	0.856153
RHOT1	0.0921072	0.428519	0.950266
ABT1	0.0921324	0.428519	0.959596
GPX1	0.0921433	0.428519	1.08433
DDX50	0.0921463	0.428519	0.948864
GPHN	0.0922404	0.428519	0.988439
PAPD4	0.0922724	0.428519	0.948413
EIF5B	0.0923859	0.428716	1.08042
RAE1	0.0925594	0.428868	0.941946
DPF2	0.092561	0.428868	0.888631
DPH5	0.0926426	0.428917	0.97992
POLR3K	0.0928356	0.42948	0.893873
TMEM43	0.0933554	0.431554	1.14286
PHF6	0.0936832	0.432436	0.898763
TMEM208	0.0936896	0.432436	0.935543
ACSL3	0.0937741	0.432494	1.09886
SGSH	0.0939945	0.433179	1.04878
SCO1	0.09427	0.434117	1.02174
INPP5A	0.094377	0.434125	1.08834
ACAT2	0.0944613	0.434125	0.84796
DRG1	0.0944878	0.434125	0.93696
NSMCE2	0.0945695	0.43417	0.973684
GPKOW	0.09471	0.434484	0.906716
CTPS	0.0948965	0.435009	0.941176
PPM1K	0.0950551	0.435404	0.78169
IKBKB	0.0951564	0.435537	1.00962
TMEM164	0.0955219	0.436879	1.1
SAMD12	0.0957491	0.437331	1.40741
GPN1	0.0957659	0.437331	0.936261
EXOSC2	0.0959213	0.437709	0.952703
VAT1	0.0959984	0.43773	1.25275
CLDND1	0.0963102	0.438668	0.882353
SLC25A17	0.0963498	0.438668	0.886473
RAB9A	0.0965973	0.439077	0.96875
STUB1	0.096638	0.439077	1.04245
NEDD1	0.0966581	0.439077	0.918506
NSUN5P1	0.0974114	0.441994	0.919308
LMNB2	0.0975524	0.441994	1.10303
CCBL2	0.0975784	0.441994	1.05946
LBR	0.0976169	0.441994	1.16186
RAB25	0.0976668	0.441994	2.33333
ANLN	0.0977568	0.442069	1.03884
SPG11	0.0981316	0.443431	1.03319
MCAM	0.0982103	0.443455	0.619718
TMBIM4	0.0983537	0.443647	1.06468
WASL	0.0985547	0.443647	1.09146
GATC	0.0985889	0.443647	1.11419
SSU72	0.098647	0.443647	0.953154
LSM3	0.0986641	0.443647	0.928488
CDC37	0.0988134	0.443647	1.0866
IKBIP	0.098814	0.443647	0.82866
SLC25A33	0.0989762	0.443647	0.827471
YIF1A	0.0991704	0.443647	0.960426
UBE2T	0.0991772	0.443647	0.906107
PPIL3	0.0992018	0.443647	1.05334
CASP7	0.0992188	0.443647	1.05
CENPF	0.0992412	0.443647	0.933029
ANKIB1	0.0992832	0.443647	1.06308
GIPC1	0.099543	0.444478	1.15789
TXNDC15	0.0997316	0.444661	0.915493
CBX6	0.0997597	0.444661	1.03188
SSBP4	0.0998052	0.444661	1.15068
UBA6	0.0999192	0.444762	1.10695
ASPH	0.0999755	0.444762	1.54975
GJC1	0.100178	0.445099	0.864929
ELF4	0.100199	0.445099	1.0303
BZW1	0.100409	0.445689	1.03315
ERP29	0.100491	0.445689	0.925023
ANAPC11	0.100577	0.445689	0.915906
MRPS36	0.10063	0.445689	0.956938
NIPSNAP3A	0.100702	0.445689	0.892308
ARL3	0.101015	0.446748	0.859238
C1ORF135	0.101154	0.447033	0.973404
MED30	0.101276	0.447245	0.871622
SNAPC3	0.101707	0.448823	0.903346
PSMB10	0.101859	0.448944	1.12044
C7ORF55	0.101884	0.448944	0.857143
MED13	0.102154	0.449807	1.0995
CKB	0.102315	0.450185	0.706806
TOPBP1	0.102696	0.451366	0.94338
ELOVL7	0.102733	0.451366	0.675325
PRTFDC1	0.102823	0.451432	1.85535
ACTR10	0.103104	0.452337	0.932591
ZBTB11	0.103396	0.45276	0.955854
EIF6	0.103396	0.45276	1.10756
AIM1	0.103426	0.45276	1.14085
MED19	0.103877	0.454354	0.93346
B4GALT6	0.103991	0.454354	1.08228
HERC2	0.104061	0.454354	1.08091
UBP1	0.104091	0.454354	1.06953
PRKACB	0.104315	0.454672	0.9681
LOC400657	0.104315	0.454672	1.0823
MIS12	0.104886	0.456757	0.94831
CECR5	0.104945	0.456757	1.05234
POLR1B	0.105082	0.456782	1.12158
AK3L1	0.105134	0.456782	0.858824
TBCK	0.105178	0.456782	1.04235
FTO	0.105351	0.456981	0.929236
ZNF721	0.105403	0.456981	0.958133
UBR7	0.105451	0.456981	0.874576
CSTB	0.105574	0.457183	1.25515
ORC3L	0.105918	0.458031	0.936877
NFKB1	0.105922	0.458031	1.11071
NDUFB1	0.106002	0.458041	0.917085
LDOC1	0.106076	0.458041	0.276786
NCEH1	0.106217	0.458205	1.16744
CSE1L	0.106332	0.458205	0.953191
ITGB4	0.106342	0.458205	1.95833
PPP1R7	0.106535	0.458693	0.997468
WDR6	0.106646	0.458693	1.01262
MLH1	0.106765	0.458693	0.933221
KIF5B	0.106833	0.458693	1.08327
KIAA0494	0.106849	0.458693	1.06628
RNASEH2C	0.106924	0.458693	0.90939
EXOC4	0.107129	0.458693	1.1
ALG3	0.107132	0.458693	0.934156
ETF1	0.10714	0.458693	0.919397
ZDHHC17	0.107218	0.458702	0.927027
ZAK	0.107422	0.458839	1.02554
GCNT2	0.107647	0.458839	0.764368
SAR1B	0.107656	0.458839	0.939189
SMC2	0.107704	0.458839	0.872
APOO	0.107819	0.458839	0.914179
CCDC138	0.107823	0.458839	0.831395
P4HA1	0.107825	0.458839	1.10976
ISCA1	0.107859	0.458839	0.928367
SLU7	0.108061	0.459213	0.973934
C5ORF33	0.1081	0.459213	1.06787
RPS21	0.108523	0.460576	0.94537
WARS	0.108641	0.460576	1.2209
RPIA	0.108649	0.460576	1.1263
MGLL	0.108918	0.46086	1.35036
MPRIP	0.108928	0.46086	1.11077
GYG1	0.108946	0.46086	0.906845
SMPDL3A	0.109057	0.461008	1.30081
ZNHIT1	0.109151	0.461079	1.04736
SSNA1	0.109241	0.461139	0.987234
NDUFS8	0.109533	0.462046	0.955215
ZNF184	0.109736	0.462581	0.910377
PEX11B	0.110191	0.463473	1.06429
GPC6	0.110266	0.463473	0.5
NMU	0.110272	0.463473	1.58553
TMEM14B	0.110303	0.463473	0.945055
MED8	0.110365	0.463473	0.863636
ADO	0.110409	0.463473	1.08011
HNRNPH2	0.110501	0.463534	0.957597
C3ORF26	0.110786	0.464204	0.902582
EFEMP1	0.110814	0.464204	0.492754
ANXA2	0.111067	0.464938	1.09402
SLC35A1	0.111267	0.465202	1.08486
TMEM188	0.111329	0.465202	0.945233
PPP3CA	0.111426	0.465202	1.09584
RAB10	0.111565	0.465202	1.07002
RANBP9	0.111678	0.465202	0.931548
ZNF720	0.111742	0.465202	0.921348
OXA1L	0.111776	0.465202	1.07615
PRPF38B	0.111803	0.465202	0.879668
HES1	0.111824	0.465202	1.23077
ANXA2P2	0.112037	0.465508	1.24642
DNAJC19	0.112052	0.465508	0.944238
CMC1	0.112722	0.467788	1.04303
STRADA	0.112817	0.467788	0.92987
SERINC3	0.112834	0.467788	1.06967
FXN	0.113038	0.468312	0.883495
SAT2	0.113273	0.46867	1.01266
HIC2	0.11328	0.46867	1.02941
NUFIP1	0.113747	0.470281	1.08779
HMGN2	0.114048	0.470485	0.983919
PDCD10	0.114093	0.470485	0.927146
ARMC10	0.114129	0.470485	1.01302
SEC14L1	0.114302	0.470485	0.921788
LRP8	0.114318	0.470485	1.125
NFKBIZ	0.114489	0.470485	1.23656
ZNF326	0.114521	0.470485	0.932432
TMEM160	0.114551	0.470485	0.965517
PSMB6	0.114609	0.470485	0.884396
HADH	0.11474	0.470485	0.997619
DPM1	0.1148	0.470485	0.939759
HEATR2	0.114826	0.470485	1.09762
AKT2	0.114893	0.470485	1.08718
B3GNT5	0.114941	0.470485	1.27143
IFITM1	0.115017	0.470485	1.45935
SYPL1	0.115107	0.470485	1.04466
CARHSP1	0.115129	0.470485	0.855714
HAGH	0.115336	0.470485	0.938389
GPR177	0.115354	0.470485	1.43523
DHRS7	0.115358	0.470485	0.968335
THSD4	0.11546	0.470583	1.26882
DNAJB1	0.115619	0.470671	1.11663
PARVA	0.115692	0.470671	1.2236
PPCS	0.115767	0.470671	1.11017
KIAA1429	0.115794	0.470671	0.959391
ELAVL1	0.116023	0.470748	1.00499
HAT1	0.116086	0.470748	0.91036
HNRNPUL1	0.116176	0.470748	1.04946
TAF11	0.116268	0.470748	0.924125
FTHL5	0.116277	0.470748	1.05116
GAL	0.116281	0.470748	2.82609
CKAP5	0.116408	0.470944	0.927273
F2RL1	0.116557	0.471231	1.675
CDH2	0.116952	0.472511	0.207547
ANXA3	0.117166	0.473041	2.59394
DPH3	0.117307	0.473041	0.903678
PEX5	0.117319	0.473041	1.05502
MT1E	0.117549	0.473654	2.53241
KIAA1671	0.117786	0.474218	1.23596
GNL2	0.117847	0.474218	0.908982
PYCARD	0.118028	0.474633	1.57292
DCP1A	0.118145	0.474787	1.06135
S100A2	0.118629	0.475963	1.60556
LYSMD3	0.118659	0.475963	0.923358
ZNF550	0.118809	0.475963	0.970588
MAPK13	0.118858	0.475963	1.16667
HSPA8	0.118873	0.475963	1.03166
NCAPG	0.118912	0.475963	0.856392
SNRNP40	0.11916	0.476639	0.893365
SMS	0.119539	0.477451	0.922078
PIGY	0.119564	0.477451	1.0292
KCTD5	0.119643	0.477451	1.02138
SHFM1	0.11968	0.477451	0.970806
COX6A1	0.120106	0.478731	0.940789
LOC150381	0.120159	0.478731	1.04469
SERPINB6	0.120253	0.478788	1.15712
UBAP2L	0.120391	0.478819	0.991202
UIMC1	0.12042	0.478819	0.888889
MFHAS1	0.120658	0.478856	1.0989
CD99	0.121014	0.478856	1.17979
CADM1	0.121081	0.478856	0.495495
DSN1	0.121132	0.478856	0.940439
ABHD11	0.121135	0.478856	1.11494
ZMAT2	0.121278	0.478856	0.917172
C11ORF67	0.121294	0.478856	0.837321
MAN1A1	0.121315	0.478856	1.44068
SGOL2	0.121321	0.478856	0.911058
TNS3	0.121365	0.478856	1.00525
RHOF	0.121525	0.478856	1.3125
NOTCH2	0.121612	0.478856	1.06542
LUC7L3	0.121624	0.478856	0.94388
VDAC1	0.121626	0.478856	1.03895
KLF6	0.12166	0.478856	1.15052
KDELR2	0.1217	0.478856	1.15979
IFT52	0.12213	0.480071	0.978648
PDGFA	0.122168	0.480071	1.18182
FAM158A	0.122601	0.481091	0.913242
CHKB	0.122615	0.481091	1.14692
KIF2C	0.122667	0.481091	0.976861
MINPP1	0.122889	0.481371	1.00691
STIL	0.122898	0.481371	0.928571
MRPS10	0.123066	0.481715	1.03549
IGFBP7	0.123155	0.481752	0.38
N4BP2	0.123621	0.4831	0.87037
SEC23A	0.12395	0.4831	1.05181
SS18L1	0.124027	0.4831	0.971989
HLA-E	0.12408	0.4831	1
DNAJB11	0.124208	0.4831	0.910737
MRPS6	0.124315	0.4831	1.09835
BCL2L2	0.124367	0.4831	1.01579
ABCB7	0.12446	0.4831	0.94362
C4ORF27	0.124468	0.4831	0.925976
NOB1	0.124575	0.4831	1.0777
C15ORF23	0.124597	0.4831	0.986951
BYSL	0.124616	0.4831	0.979769
TIPARP	0.124622	0.4831	1.11148
SEC24D	0.124622	0.4831	1.07168
MRPS30	0.124858	0.483703	1.06731
DHX36	0.125159	0.484559	0.961864
COL12A1	0.125386	0.485125	0.641509
VAV3	0.125488	0.485211	0.55
HCCS	0.125906	0.486179	0.955017
NUDT4	0.125952	0.486179	1.19101
FNTA	0.125981	0.486179	1.00839
C1ORF109	0.126134	0.486458	0.977941
VPS13B	0.126236	0.486514	0.94362
MDH2	0.12631	0.486514	1.03535
SCD5	0.126492	0.486907	0.946237
OSBPL11	0.126988	0.488502	0.923706
BAG4	0.127201	0.48901	1.06522
POPDC3	0.127442	0.489622	0.425676
HLA-J	0.127567	0.489627	1.10108
DNM1L	0.127605	0.489627	0.939206
DUSP23	0.128064	0.490285	1.10526
C5ORF43	0.128096	0.490285	1.06321
KIF23	0.128131	0.490285	0.926415
GTF2H3	0.128169	0.490285	1.03479
UBE3C	0.128183	0.490285	1.03686
NEK9	0.128313	0.490344	1.07857
SDF2L1	0.128395	0.490344	0.854772
HERC1	0.128443	0.490344	0.929368
MMS19	0.128772	0.491022	1.025
FPGT	0.128834	0.491022	0.897297
MRPL40	0.128865	0.491022	0.863967
C9ORF16	0.129048	0.491409	1.03462
PFKFB3	0.129331	0.492076	0.929032
CDK2AP2	0.129386	0.492076	0.943925
ESYT1	0.12962	0.492655	1.06008
FBL	0.129721	0.492726	1.05657
LOC641298	0.130071	0.493503	0.84127
TSSC1	0.130092	0.493503	1.04384
ARF3	0.130171	0.493503	0.844937
AGAP1	0.130397	0.494049	1.07203
SEC23B	0.130612	0.494554	1.08834
CSDA	0.130855	0.495164	1.04429
C7ORF59	0.130992	0.495371	0.983516
EIF2S3	0.131531	0.497079	0.871645
INSIG1	0.131609	0.497079	1.05286
PIGK	0.132085	0.498566	0.93931
GAS5	0.13223	0.4986	0.890244
KPNA2	0.132278	0.4986	0.952959
HMGN1	0.132584	0.4986	0.850958
SIAH2	0.132602	0.4986	0.902344
TCEAL1	0.132668	0.4986	0.819121
KDELR3	0.132758	0.4986	1.20963
ACPL2	0.132816	0.4986	1.11966
ABLIM1	0.132828	0.4986	1.22814
CXORF26	0.132891	0.4986	1.00903
METTL11A	0.132921	0.4986	0.934363
ATP5D	0.133085	0.498691	1.0541
OXSR1	0.133147	0.498691	1.10428
TACC1	0.133337	0.498691	1.21569
TYW3	0.133491	0.498691	0.870155
TOMM34	0.133515	0.498691	1.02632
NBPF10	0.13354	0.498691	0.932817
ITM2B	0.133646	0.498691	1.05557
NUDT22	0.133649	0.498691	1.03396
C9ORF6	0.133695	0.498691	1.07803
PMEPA1	0.133773	0.498691	1.36628
TMEM203	0.133931	0.498972	0.963432
DCTN2	0.134066	0.499168	0.931966
SH3D19	0.134152	0.499178	1.24046
ZNF45	0.134373	0.499691	0.906883
REEP4	0.13448	0.499783	1.06468
PRDX4	0.134893	0.500627	0.926805
ACADM	0.13505	0.500627	0.856397
ALDH3A2	0.135057	0.500627	1.36058
RBPMS	0.135187	0.500627	1.15563
IQGAP1	0.135193	0.500627	1.05882
SLC25A32	0.135228	0.500627	0.950113
STK10	0.13532	0.500627	1.08553
YIF1B	0.135372	0.500627	0.92953
PHTF2	0.135627	0.501262	0.875959
ZYG11B	0.135717	0.501289	0.93586
TRADD	0.136299	0.503128	1.04891
DEPDC1B	0.136495	0.503545	0.917313
SFRS7	0.136786	0.504309	0.891447
THEM4	0.137146	0.505329	1.17961
ANKRD46	0.137325	0.50568	0.891626
CBX5	0.137476	0.505925	0.935185
EFHA1	0.138171	0.508116	1.02993
GPI	0.138274	0.508116	1.03831
TUBB2B	0.138324	0.508116	0.740741
HMGB3L1	0.138585	0.508457	0.955357
FUT8	0.138586	0.508457	1.17727
C14ORF147	0.138943	0.509313	0.97709
STRADB	0.138988	0.509313	1.08815
SEC62	0.139119	0.509484	0.913043
PEX2	0.139348	0.509876	0.989437
CCNB1IP1	0.139511	0.509876	1.09153
NR2F2	0.139583	0.509876	1.02849
SGK3	0.139886	0.509876	0.873418
NEK1	0.139929	0.509876	1.01176
CDC42BPA	0.140048	0.509876	1.23553
SAC3D1	0.140083	0.509876	0.89372
PCGF3	0.140107	0.509876	1.03462
C12ORF24	0.140142	0.509876	0.85623
LOC728153	0.140243	0.509876	0.841463
PATL1	0.14034	0.509876	1.02632
HSF2	0.140356	0.509876	0.924883
MRRF	0.140382	0.509876	1.07116
FAM120A	0.140411	0.509876	1.00196
TMEM167B	0.140586	0.510205	0.927711
KCTD9	0.140727	0.510412	1.05236
TOPORS	0.141109	0.511488	0.908163
SNHG5	0.141247	0.511682	1.13916
SDC4	0.141548	0.512464	1.34942
NUDCD1	0.141992	0.513278	0.96129
EIF2B1	0.142149	0.513278	0.977362
ARPC3	0.142169	0.513278	0.958836
KARS	0.14218	0.513278	1.02962
SOCS5	0.142199	0.513278	1.02676
EBP	0.142808	0.514676	0.880763
XPNPEP3	0.142829	0.514676	1.12349
CSK	0.142842	0.514676	1.11656
DMXL1	0.143014	0.514816	0.923077
PAPSS2	0.143052	0.514816	1.40304
TMBIM6	0.143708	0.516622	1.05908
APTX	0.143792	0.516622	0.912536
TSPAN5	0.143836	0.516622	1.54945
ARPC1B	0.143896	0.516622	1.15447
SFRS11	0.14399	0.516628	0.992671
MORF4L1	0.14407	0.516628	1.01085
MYO5C	0.144525	0.517951	1.71329
MPHOSPH9	0.144861	0.517968	0.886207
CROCCL1	0.144889	0.517968	0.912234
TNKS	0.144958	0.517968	1.08374
WDR77	0.145018	0.517968	0.895879
NCL	0.145037	0.517968	1.04011
GLS	0.145045	0.517968	1.22778
FBXO8	0.145346	0.518421	1.01515
DDRGK1	0.145443	0.518421	0.928889
ESD	0.14559	0.518421	1.09448
EEF1B2	0.145649	0.518421	1.08794
CRLS1	0.145726	0.518421	1.10227
LIX1L	0.145846	0.518421	0.877119
ARRDC4	0.145853	0.518421	1.11724
ADD3	0.14586	0.518421	1.16184
MED7	0.146019	0.51868	0.932773
C12ORF44	0.146258	0.518947	0.890443
GMPS	0.146316	0.518947	0.918286
RPAP3	0.146352	0.518947	0.988691
PAQR3	0.146579	0.519447	0.981366
FLJ10357	0.146767	0.519804	1.44628
ODF2	0.146852	0.519804	0.883333
E2F3	0.147092	0.519822	0.924528
ZFP64	0.147099	0.519822	0.973494
C17ORF79	0.147282	0.519822	0.920981
NDUFA9	0.147291	0.519822	1.05365
STOM	0.147461	0.519822	0.840404
CCNG1	0.147478	0.519822	1.11222
JAG1	0.147523	0.519822	1.58464
TRIB1	0.147816	0.519822	1.27114
MYL6B	0.14782	0.519822	0.938751
RPA2	0.147885	0.519822	0.963323
NUCKS1	0.147904	0.519822	0.893775
ARL4A	0.147921	0.519822	1.13636
COX18	0.148134	0.519822	1.10909
TMEM11	0.148151	0.519822	0.959559
PLXNA1	0.148151	0.519822	0.98538
CHORDC1	0.148328	0.52014	0.884252
F3	0.14843	0.520194	1.37168
LPHN2	0.148553	0.520323	0.457447
WDR45L	0.148916	0.520992	1.09416
MEAF6	0.148916	0.520992	0.988871
BACH1	0.149185	0.521193	1.12109
DCPS	0.14921	0.521193	0.92691
RELL1	0.149233	0.521193	1.04076
CCDC117	0.149439	0.521608	0.849558
RNH1	0.149563	0.52174	1.05327
PSRC1	0.14965	0.521741	0.868502
TIMM8B	0.149814	0.522012	0.936737
SUCLA2	0.150049	0.522241	1.05229
EIF2AK3	0.150053	0.522241	0.9775
FBXL12	0.150322	0.522873	0.978495
CAMK2N1	0.150654	0.523726	1.35052
ZDHHC9	0.15094	0.524419	1.05014
C20ORF43	0.151534	0.52618	0.904709
IGBP1	0.151716	0.526509	1.06437
C16ORF80	0.15202	0.527203	0.902361
PHF10	0.152119	0.527203	0.849057
RRM1	0.152179	0.527203	0.92619
COPS3	0.152765	0.528652	0.952749
MUS81	0.152829	0.528652	0.935897
YY1	0.15286	0.528652	1.09841
MLF2	0.15331	0.528946	1.09954
FTSJD1	0.15336	0.528946	1.12088
LCMT1	0.153387	0.528946	0.971374
PRNP	0.153485	0.528946	1.17196
ARL5A	0.153538	0.528946	1.06306
FBLIM1	0.153581	0.528946	1.65693
INO80E	0.153648	0.528946	0.986301
SUDS3	0.153657	0.528946	1.12366
MTDH	0.153767	0.528946	1.0398
ASPM	0.153823	0.528946	0.917595
EPS15	0.154003	0.529266	0.940741
CPOX	0.154831	0.531704	1.10089
SEMA3A	0.154966	0.531704	1.15873
PANK2	0.154986	0.531704	0.939607
CD46	0.155145	0.531704	1.17602
DTNBP1	0.155248	0.531704	0.858779
EDEM1	0.155291	0.531704	1.1087
GRHPR	0.155333	0.531704	0.968637
ACACA	0.155418	0.531704	1.10108
UBR3	0.155867	0.532563	1.07419
OGFRL1	0.155917	0.532563	0.73065
CPNE2	0.155986	0.532563	1.04386
KCTD10	0.156032	0.532563	1.00356
BAD	0.156111	0.532563	0.906736
MEST	0.156313	0.532911	1.47076
ERCC6L	0.156498	0.532911	0.895928
IGFBP4	0.156563	0.532911	1.45333
EMD	0.156567	0.532911	0.906736
WIPF1	0.156735	0.533127	1
PER2	0.156807	0.533127	1.09718
FAM38A	0.156992	0.533347	1.17219
PQLC3	0.157049	0.533347	1.06047
FAM161B	0.157332	0.53369	0.953069
CDK13	0.157341	0.53369	1.01978
RNF4	0.157416	0.53369	1.05326
PCGF5	0.157972	0.535275	1.04823
MAP4	0.158079	0.535336	1.08
SHMT2	0.15818	0.535378	1.07738
EBAG9	0.158273	0.535393	0.964782
C19ORF33	0.158473	0.53577	8.96875
MRPS18C	0.158662	0.535925	0.93865
SNRPA1	0.158815	0.535925	0.933702
SC5DL	0.158822	0.535925	0.954089
AMFR	0.159044	0.535925	0.856322
C4ORF14	0.159119	0.535925	1.11315
FH	0.159239	0.535925	0.907801
LPP	0.159369	0.535925	1.1604
NOL9	0.159388	0.535925	0.943966
FBXO21	0.1595	0.535925	1.00238
ATP13A1	0.159505	0.535925	1.09464
MECOM	0.159601	0.535925	2.18667
ZFAND2A	0.159681	0.535925	1.14829
PLXNB2	0.15972	0.535925	1.3363
PFKP	0.159969	0.535925	1.12568
ZNF274	0.160004	0.535925	0.832898
IFI6	0.160016	0.535925	0.865497
LSM10	0.160031	0.535925	0.916832
PDE8A	0.160269	0.536424	1.05147
USPL1	0.160361	0.536436	1.09926
TRNP1	0.160657	0.537128	1.23077
CDIPT	0.160828	0.537202	0.955363
SLC37A4	0.160936	0.537202	0.926407
HAUS1	0.160947	0.537202	0.933257
LOC203107	0.161092	0.53739	0.863636
MTR	0.161321	0.537708	1.06338
DLG1	0.161366	0.537708	0.9375
CLUAP1	0.16168	0.537872	1.02941
KIAA1267	0.161719	0.537872	1.025
PTCD2	0.161795	0.537872	0.934932
ACTR2	0.161856	0.537872	1.05538
HIPK1	0.161948	0.537872	0.906344
LOC285812	0.162003	0.537872	0.848101
TNFAIP1	0.16204	0.537872	1.02602
SEMA3F	0.162159	0.537965	0.778626
TBC1D9B	0.162246	0.537965	1.04474
FMNL2	0.162405	0.538007	1.05176
PDCD4	0.162438	0.538007	0.874214
NCOA7	0.162636	0.53837	1.27764
EEF1D	0.16273	0.538384	1.04223
WWOX	0.163277	0.539494	0.856164
ATP1A1	0.163304	0.539494	1.05232
OCIAD2	0.163334	0.539494	1.26788
KDELC2	0.163433	0.539526	1.17623
DAB2	0.1636	0.539782	1.51852
ZC3HAV1L	0.163738	0.53994	1.12224
RIT1	0.163837	0.539971	1.03595
MTRR	0.164179	0.540642	1.05505
DCXR	0.164219	0.540642	0.898403
POLE2	0.164609	0.541043	0.901852
FOXN3	0.164754	0.541043	0.779141
DALRD3	0.165217	0.541043	1.1
TM9SF1	0.165234	0.541043	1.09391
UCA1	0.165302	0.541043	1.48148
MAP2K1	0.165386	0.541043	1.11481
CDK5RAP2	0.165482	0.541043	0.941581
CTCF	0.165589	0.541043	0.950752
C20ORF20	0.165595	0.541043	1.08936
BBS4	0.165631	0.541043	0.943128
PHB	0.165745	0.541043	1.04401
C14ORF179	0.165771	0.541043	1.03743
ACER3	0.165786	0.541043	1.0142
C1ORF106	0.165907	0.541043	1.20879
ACAA1	0.166025	0.541043	1.00952
PARP1	0.166125	0.541043	0.887446
PON2	0.166401	0.541043	1.21288
TP53BP2	0.166451	0.541043	1.06367
SUMO2	0.166459	0.541043	0.974563
RAB32	0.166545	0.541043	1.21053
MAFK	0.166638	0.541043	1.06667
LXN	0.16676	0.541043	1.51376
MAPRE1	0.166815	0.541043	0.928833
APOBEC3G	0.166867	0.541043	1.64557
DPCD	0.166955	0.541043	1.23305
PPIH	0.166988	0.541043	0.929221
GOLM1	0.167007	0.541043	1.15545
ATP5L	0.167057	0.541043	0.894813
TMX4	0.16706	0.541043	1.09018
MAN2A1	0.167117	0.541043	1.07983
MAP1B	0.167174	0.541043	0.982955
XPOT	0.167257	0.541043	0.941392
CDK5RAP1	0.167303	0.541043	0.973941
SFRS9	0.167745	0.542182	0.928763
C2ORF79	0.1679	0.542277	0.964066
KCTD15	0.167968	0.542277	0.767544
WNK1	0.168045	0.542277	0.931559
LAMB3	0.168141	0.542299	2.13462
GNG12	0.168405	0.542859	1.22897
SRP9	0.168571	0.543103	0.968081
ATP6V0E2	0.16885	0.543207	0.893701
CMTM3	0.168867	0.543207	1.09268
PLAT	0.168874	0.543207	2.12821
TMEM199	0.169209	0.543439	0.928571
MGST3	0.169213	0.543439	1.08455
H2AFV	0.169216	0.543439	0.924115
C21ORF57	0.169543	0.5442	0.901961
SGCB	0.169977	0.545302	1.1206
TAF1	0.170342	0.545613	0.926036
ZNF93	0.170461	0.545613	0.753846
ALKBH6	0.170539	0.545613	0.948276
CSGALNACT2	0.17055	0.545613	0.944751
ARHGAP1	0.170555	0.545613	1.04934
BHLHE40	0.170617	0.545613	1.2119
RDH11	0.170775	0.545828	1.05777
NDUFS7	0.171078	0.546414	0.929047
FUNDC1	0.17128	0.546414	0.897059
SAP30BP	0.171297	0.546414	0.96129
CSRP2	0.171321	0.546414	0.679283
SEC23IP	0.171499	0.546691	1.10508
LMAN1	0.171772	0.547273	1.00977
SMARCAD1	0.171924	0.547392	1.05585
MREG	0.172135	0.547392	0.9
LOC220906	0.172289	0.547392	1.04305
ASH2L	0.172358	0.547392	1.0514
CHIC2	0.172536	0.547392	0.909396
DHX15	0.172574	0.547392	1.02799
TBC1D7	0.172581	0.547392	0.994681
ACTR1B	0.172586	0.547392	1.08264
ZNF146	0.172626	0.547392	0.950112
ERI2	0.172772	0.547463	1.0098
SULT1A1	0.17283	0.547463	1.11268
HMGCR	0.173335	0.548773	0.870912
RFK	0.173925	0.550351	1.1082
CA2	0.174078	0.550548	0.448276
STAU2	0.174289	0.550925	0.893536
PFN1	0.174931	0.552399	1.02706
SAMD9	0.174946	0.552399	1.18699
IVNS1ABP	0.17503	0.552399	0.951777
RAG1AP1	0.175137	0.552446	1.05727
FGFR1OP	0.175354	0.552843	0.902579
YKT6	0.175503	0.553022	1.12745
CHMP2B	0.175629	0.553132	1.03333
RNPS1	0.175959	0.553881	1.01204
RAD23B	0.176607	0.555251	0.927617
POGZ	0.176641	0.555251	0.882353
LIAS	0.176772	0.555251	1.09406
INSIG2	0.176873	0.555251	1.0514
DERL1	0.176898	0.555251	0.931109
TMEM38B	0.176947	0.555251	0.94186
ERI1	0.177165	0.555323	1.11594
CUTA	0.177268	0.555323	0.948304
RAP1A	0.177371	0.555323	0.979787
CSNK1G1	0.177398	0.555323	1.0597
DDX18	0.177431	0.555323	1.06776
GPR89A	0.17756	0.555368	0.978516
TERF1	0.177629	0.555368	0.955497
TP53	0.178082	0.556196	1.12033
RPL39	0.178107	0.556196	0.985265
PRSS23	0.178171	0.556196	1.28264
EIF2AK1	0.178408	0.556464	1.04986
RNF38	0.178441	0.556464	0.958333
C5ORF25	0.178642	0.556801	1.04467
RPS7	0.17876	0.556865	0.946563
C6ORF173	0.178938	0.556865	0.937147
PARN	0.178939	0.556865	0.969199
CUL2	0.179227	0.557471	0.947896
TMEM54	0.179394	0.557621	1.22388
MAFG	0.17946	0.557621	1.06468
C22ORF32	0.179639	0.557631	0.979914
SNAPC5	0.179709	0.557631	0.974269
IL1R1	0.179825	0.557631	1.65574
PARK7	0.179862	0.557631	0.981873
LOC100129387	0.179926	0.557631	0.911538
SNRNP25	0.180297	0.558495	0.973941
HNRNPA3	0.180436	0.558637	0.891192
SNRPE	0.180649	0.55898	0.943338
CYB561	0.180891	0.55898	1.42241
POLRMT	0.180897	0.55898	1.21429
C1ORF63	0.180988	0.55898	0.935484
USP34	0.181013	0.55898	0.912752
NFX1	0.181103	0.55898	0.968937
TMEM186	0.181505	0.559898	0.952991
RAB5A	0.181782	0.559898	1.02217
HLA-B	0.181811	0.559898	1.12691
PCBP2	0.181843	0.559898	0.893103
TSPAN1	0.181919	0.559898	2
CCDC14	0.181958	0.559898	0.998165
RECQL	0.182305	0.56068	0.880785
CD320	0.182674	0.561531	1.00664
SAE1	0.183011	0.562107	0.878706
NUMB	0.18308	0.562107	1.10048
ZNF207	0.183248	0.562107	0.925816
NXF1	0.183321	0.562107	0.976415
MCCC2	0.183332	0.562107	1.06855
CHMP5	0.183421	0.562107	0.957571
QKI	0.184007	0.563468	0.803571
MSN	0.184117	0.563468	0.913664
RING1	0.184146	0.563468	0.908642
NARG2	0.184299	0.56365	0.938596
DUS1L	0.184393	0.563652	0.98513
KRT7	0.184542	0.563715	1.15217
EXT1	0.184601	0.563715	1.11633
MRPL35	0.184758	0.563804	1.06667
MICB	0.184817	0.563804	0.913386
ELP4	0.184965	0.56397	0.985507
SPG20	0.185284	0.564657	0.963542
LSM1	0.185431	0.564818	1.00316
TAP2	0.18569	0.565046	0.960961
HSD17B4	0.185851	0.565046	1.02004
NT5DC2	0.185882	0.565046	1.06832
VPS26A	0.185956	0.565046	1.08811
EIF4B	0.186038	0.565046	0.968037
C2ORF56	0.186111	0.565046	0.944664
SMAD5	0.186161	0.565046	0.93722
HMBOX1	0.1863	0.565183	1.01027
PJA1	0.186451	0.565355	0.92437
PMS2L5	0.186624	0.565596	1.06292
NUP160	0.187118	0.566807	1.10036
AIP	0.187265	0.566884	0.941964
C1ORF156	0.187331	0.566884	0.955017
C17ORF42	0.187457	0.566981	0.990148
TUBB6	0.187603	0.567137	0.73849
MRPL52	0.187822	0.567354	1.11925
ISG20	0.187863	0.567354	1.53846
EIF1B	0.188068	0.567689	0.97241
CNIH	0.188323	0.568174	1.04547
[truncated: 4,030 more rows]

## Sheet: Data S3 GREP model classifier
Logistic regression classifier using significant ratios as features
Ratios	coefficients
intercept	-0.035354
BID/RBX1	0.251688
BID/DEDD	0.394674
CASP8/CFLAR	0.718185
CASP8/PSMC5	-0.155449
CASP8/XIAP	0.534598
CASP8/PTMA	0.11362
CDKN2A/PARP4	-0.140463
EGR1/TNFRSF10B	-0.1186
FAS/TNFRSF10B	-0.12476
MSN/TNFRSF10B	-0.132907
PSMC5/PARP4	-0.194918
TNFRSF10B/XIAP	0.368318
TNFRSF10B/NGFRAP1	0.0630232
CASP4/DEDD	-0.00767654
TNFRSF10B/PTMA	NA
XIAP/PARP4	NA
PTMA/PARP4	NA

## Sheet: Data S4 In-vivo data
primary tumor Xenografts	Model	Lineage	T/C (%)	Sensitivity	GREP prediction probability	GREP prediction class	ARHGDIA	ATF3	BAX	BCL2	BCL2L1	BID	BIRC2	BIRC3	BTRC	CASP10	CASP8	CDKN2A	CFLAR	CUL3	CYLD	EGR1	EZR	FADD	FAS	FASLG	FBXW7	GALNT14	HUWE1	IL8	ITCH	MADD	MAPK8	MCL1	MDM2	MSN	MYC	PEA15	PRKCD	PSMC5	PTGS2	RAB7A	RARA	RBCK1	RBX1	RFFL	RHOA	RIPK1	RIPK3
X-1317Hpancreas-P0M1-P1M3-re-P2M1-P3M3-6-P4M1	X-1317	pancreas	-100	regression	0.896648	sensitive	133.739	4.08305	317.052	6.78094	262.178	760.784	2591.03	873.626	101.154	98.1217	1054.27	53.5241	909.203	215.633	127.108	77.11	138.844	693.343	321.038	9.26752	156.871	431.965	17.47	553.829	398.028	186.695	338.478	1979.54	30.772	590.676	1405.8	98.3083	138.304	1986.07	143.595	776.124	4.5555	1154.04	2113.22	802.792	1487.06	46.4612	86.9029
X-2046Hpancreas-P0M1-P1M1	X-2046	pancreas	-66	regression	0.73901	sensitive	92.3458	38.7263	154.556	46.1918	667.733	583.692	1880.16	565.587	114.21	141.802	724.387	9.37363	622.061	250.076	194.92	416.321	73.2761	448.888	93.8283	22.9291	129.752	420.394	24.4615	2649.81	329.772	125.327	235.617	2512.75	27.9655	842.224	992.294	271.554	238.69	1218.35	1300.93	942.987	26.6841	1079.88	1988.96	594.692	4040.55	189.552	125.29
X-2198Hpancreas-P0M1-P1M4-P2M1-P3M1-P4M1	X-2198	pancreas	-57.4	regression	0.62963	sensitive	61.1198	7.79343	246.43	35.9272	423.483	977.54	2113.74	1132.08	90.0008	77.2261	621.284	246.768	222.927	109.694	83.1075	201.955	98.4329	248.697	62.9829	15.2722	220.968	2.04553	66.5161	2638.41	335.696	230.825	353.946	3370.25	42.4069	381.961	972.793	109.485	174.025	665.653	458.931	573.098	1.32286	1182.68	1014.56	396.658	755.504	86.9591	166.013
X-2633Hpancreas-P0M1-P1M3-P2M7-P3M1-P4M1	X-2633	pancreas	-2.6	stasis	0.555962	sensitive	99.4259	6.29553	273.967	18.9039	210.278	953.075	2163.21	1203.14	114.615	114.099	647.884	1.1251	646.997	186.619	106.097	79.5957	134.507	285.493	529.91	17.9154	322.39	377.951	60.0069	1273.85	313.469	130.875	399.247	2195.73	45.4998	2084.21	1387.75	114.781	46.4029	1192.39	473.646	880.639	2.43297	1038.84	2013.63	1006.91	937.877	84.996	133.059
X-2428Hpancreas-P0M2-P1M3-P2M5-P3M1-P4M1	X-2428	pancreas	29.3	no activity	0.216817	resistant	115.86	4.86223	251.363	32.0322	564.986	298.744	2886.72	669.782	131.5	65.6783	569.098	2.38639	562.1	130.4	93.3346	66.4936	142.208	498.504	194.327	15.5835	282.029	634.396	19.6967	1939.38	482.18	199.064	374.658	2468.46	40.2429	51.0782	891.802	164.81	96.3518	1930.01	364.812	394.985	5.749	646.13	2085.91	1161.82	944.605	162.76	228.224
X-2043Hpancreas-P0M1-P1M1	X-2043	pancreas	41.3	no activity	0.144969	resistant	160.857	3.78719	203.421	50.4225	530.25	162.894	1871.43	236.141	90.1276	85.9561	681.612	22.154	825.868	128.896	141.113	479.517	51.5557	570.474	740.175	28.243	65.962	12.8386	33.3296	69.354	199.929	142.752	276.439	3146.11	18.6391	1125	982.381	1568.3	80.9157	1366.21	362.49	1458.2	27.6404	413.519	1919.55	519.767	4761.72	158.171	246.881
X-2406Hpancreas-P0M1-P1M4-P2M1-P3M2-P4M1	X-2406	pancreas	53.8	no activity	0.367388	resistant	119.865	20.5985	304.822	16.488	367.062	445.955	1837.63	984.558	122.609	118.243	551.16	701.857	707.017	201.647	185.061	297.682	250.409	320.183	138.422	30.7248	221.819	1079.41	25.9136	944.099	401.984	185.701	344.738	2349.42	16.8808	300.254	2662.25	71.8722	175.561	1571.09	117.722	732.581	11.1453	1118.76	1162.32	886.838	1154.75	69.407	125.192
X-1948Hpancreas-P0M1-P1M1-Re-P2M1-P3M1	X-1948	pancreas	54	no activity	0.456342	resistant	104.267	17.7598	189.311	20.2458	302.082	428.317	1565.93	271.736	110.583	141.509	960.768	572.667	723.615	263.47	172.7	260.215	51.3337	324.781	539.811	22.891	388.161	486.385	67.8775	169.223	313.178	188.845	306.932	3168.85	30.5078	64.0147	1405.59	128.851	98.1171	1102.47	636.303	875.861	6.32926	1538.43	1081.21	1763.68	959.94	121.748	159.832
X-2026Hpancreas-P0M2-P1M3-P2M3-P3M4	X-2026	pancreas	58.6	no activity	0.275289	resistant	99.4774	18.1481	318.687	3.48764	255.443	278.665	2174.69	155.629	174.553	115.382	1069.03	503.52	429.684	307.88	196.934	23.3676	63.5399	584.539	676.448	13.4634	253.198	34.5484	50.7733	36.9387	315.719	209.281	291.547	4005.23	22.7566	1535.14	830.25	216.288	144.358	715.572	54.5883	1065.67	1.63967	591.253	1376.05	1385.05	1032.69	213.666	239.317
X-1633Hpancreas-P0M1-P1M2-P2M4-P3M2-P4M1	X-1633	pancreas	75	no activity	0.286734	resistant	119.267	6.87913	273.01	15.221	622.044	386.517	1611.24	130.318	157.204	86.4535	521.905	16.2293	654.221	252.193	117.176	765.517	40.873	455.536	96.5929	18.8311	96.7983	247.12	48.4156	442.896	243.081	218.709	245.113	2208.75	21.6897	573.375	1621.39	297.088	529.784	1372.43	268.778	1024.02	1.92404	703.445	1164.28	1054.17	3121.55	228.083	287.032
X-1362Hpancreas-P0M1-P1M1	X-1362	pancreas	140	no activity	0.0368947	resistant	93.039	10.4314	134.289	18.1915	362.612	264.264	1087.64	155.629	173.479	92.5663	658.683	1051.72	639.286	225.821	170.17	748.702	61.7335	566.495	820.482	27.5175	99.5794	94.6469	105.183	1178.14	339.376	135.949	418.122	2172.95	43.0003	2088.16	1153.86	273.557	135.499	1301.04	550.565	968.735	16.9463	759.003	2675.64	926.835	1506.48	123.139	102.474
[truncated: 24 more columns]
